# Supplementary material for: Kresoxim-methyl primes Medicago truncatula plants against abiotic stress factors via altered reactive oxygen and nitrogen species signalling leading to downstream transcriptional and metabolic readjustment
Source: PubMed Central journal article supplement (PMC4762377; doi:10.1093/jxb/erv516), 2015-12-27

**Kresoxim-methyl primes against abiotic stress factors via altered reactive oxygen and nitrogen species signalling leading to downstream transcriptional and metabolic readjustment in *Medicago truncatula***

Panagiota Filippou, Chrystalla Antoniou, Toshihiro Obata, Katrien Van Der Kelen, Vaggelis Harokopos, Loukas Kanetis, Vassilis Aidinis, Frank Van Breusegem, Alisdair R Fernie and Vasileios Fotopoulos

**Supplementary Material**

The following supplementary materials are available.

**Supplementary Table S1.** Sequences for gene-specific primers.

|              |                             |
|--------------|-----------------------------|
| Mt7g111060-F | 5'-TGGCTTCTTGCAAATCAGTG-3'  |
| Mt7g111060-R | 5'-AACACCAGCATCAACATCCA-3'  |
| Mt7g111050-F | 5'-AAACACCCCGAAGTGAAGTGA-3' |
| Mt7g111050-R | 5'-ACCAAATGCCCAACAAGAAC-3'  |
| Mt7g093100-F | 5'-TGTGCAGCTCGCAATAAAAAG-3' |
| Mt7g093100-R | 5'-GGAGTTACATCACGGCCACT-3'  |
| Mt3g070860-F | 5'-CCACAATCTTGCAGGGAAGT-3'  |
| Mt3g070860-R | 5'-AATGTCAATTCTGGCCTTGG-3'  |
| Mt1g074950-F | 5'-GGCTTTGCTGAAACGAGTTC-3'  |
| Mt1g074950-R | 5'-AAGTTCAAAGCAGGAACGA-3'   |
| Mt7g024750-F | 5'-GGCGCAGGCTATAAGTTTGA-3'  |
| Mt7g024750-R | 5'-ATGGCTGTGGTGAGAAATCC-3'  |
| Mt4g077470-F | 5'-CTTTTGCCCGAGAGGGTATT-3'  |
| Mt4g077470-R | 5'-CAGGGGTGGTGACAGAGTTT-3'  |
| Mt5g061690-F | 5'-TGGCTGTTGGTGTCTTCTG-3'   |
| Mt5g061690-R | 5'-CCCTCTTAGGCCATGATTGA-3'  |

**Supplementary Table S2.** Parameters used for metabolite peak annotation.

**Supplementary Table S3.** Gene ID of different clusters from Fig 5: Gene ID (column B), gene description (column C) median centered expression values for each sample (column D-M). (B) Overview of GO enrichment for each cluster from Fig. 5.

**Supplementary Table S4.** (A) List of differentially expressed transcripts (FDR;  $p < 0.05$ ) in drought-stressed samples vs. samples pretreated with KM followed by drought (D\_KM vs D) and salt-stressed samples vs. samples pretreated with KM followed by salt (S\_KM vs S) with a  $\log_2$  FC  $> 1$ . (B) GO enrichment of differentially expressed transcripts (FDR;  $p < 0.05$ ) in drought-stressed samples vs. samples pretreated with KM followed by drought (D\_KM vs D) (C) List of differentially expressed transcripts (FDR;  $p < 0.05$ ) in drought-stressed samples vs. samples pretreated with KM followed by drought (D\_KM vs D) and salt-stressed samples vs. samples pretreated with KM followed by salt (S\_KM vs S) with a  $\log_2$  FC  $< -1$ . (D) GO enrichment of differentially expressed transcripts (FDR;  $p < 0.05$ ) in drought-stressed samples vs. samples pretreated with KM followed by drought (D\_KM vs D) with a  $\log_2$  FC  $< -1$ .

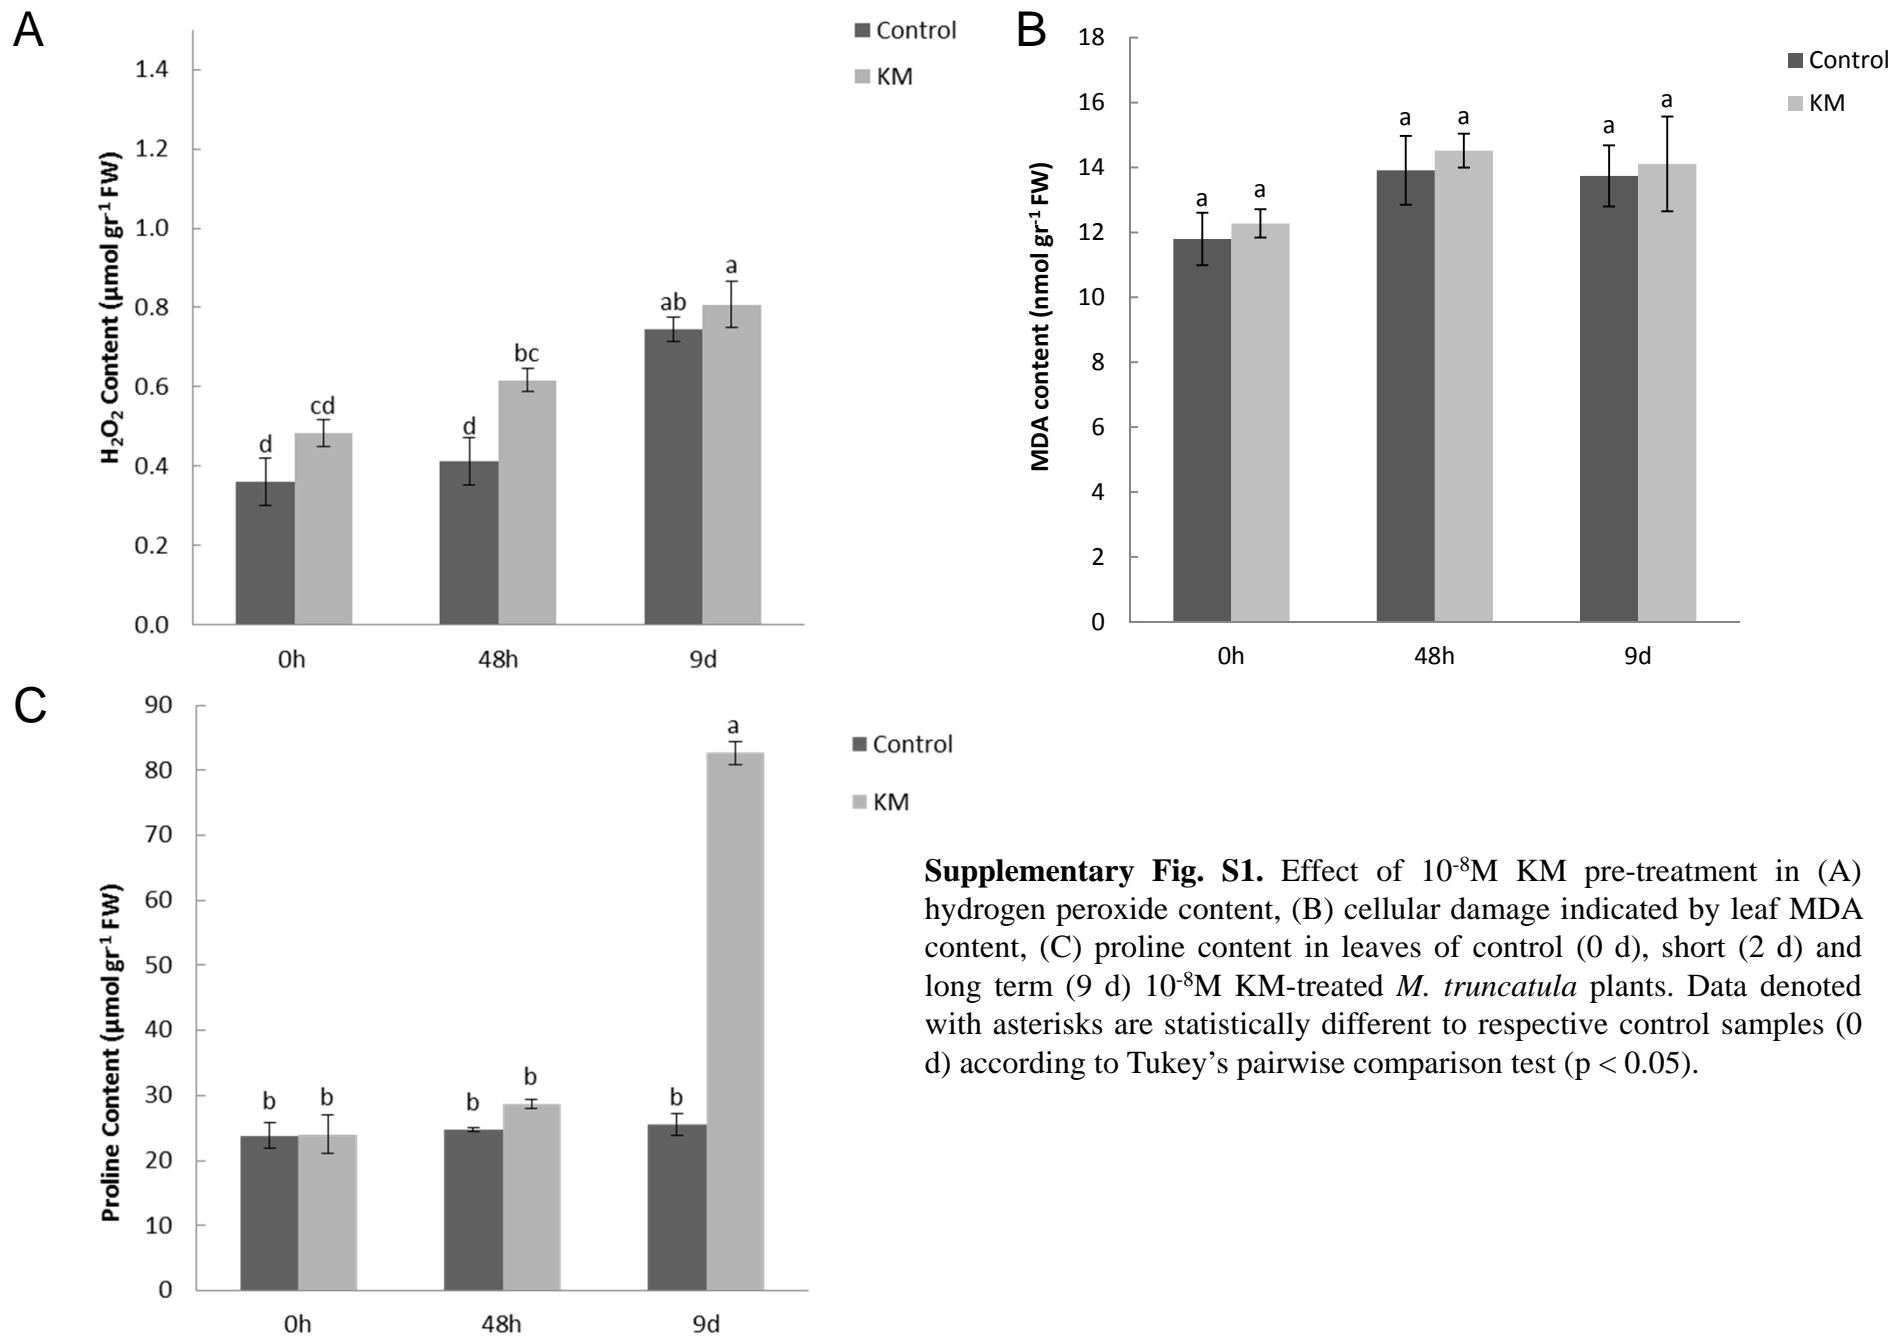

**Supplementary Fig. S1.** Effect of  $10^{-8}\text{M}$  KM pre-treatment in (A) hydrogen peroxide content, (B) cellular damage indicated by leaf MDA content, (C) proline content in leaves of control (0 d), short (2 d) and long term (9 d)  $10^{-8}\text{M}$  KM-treated *M. truncatula* plants. Data denoted with asterisks are statistically different to respective control samples (0 d) according to Tukey's pairwise comparison test ( $p < 0.05$ ).

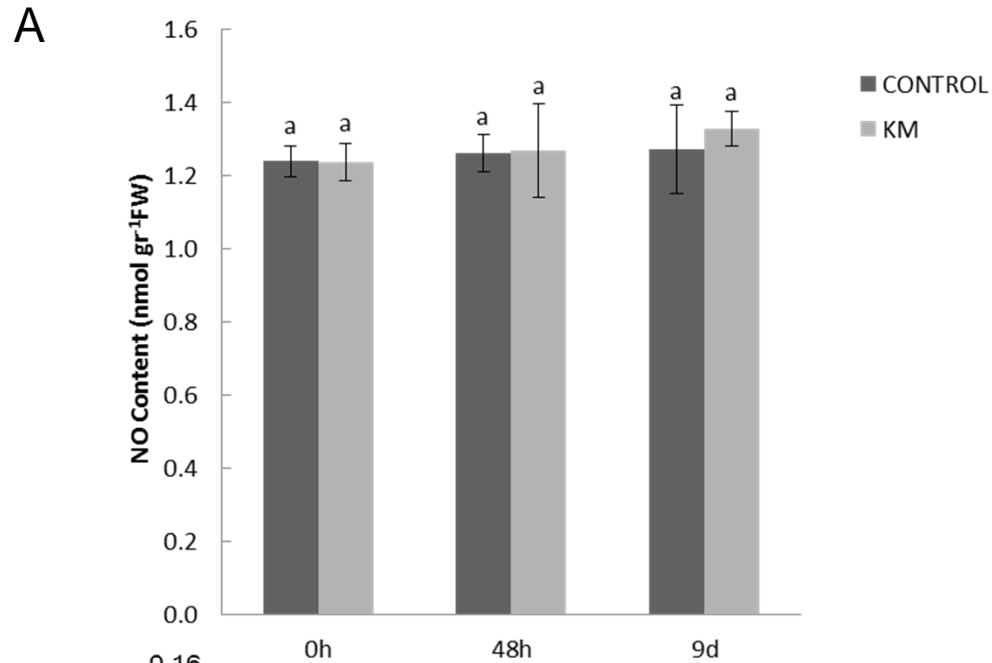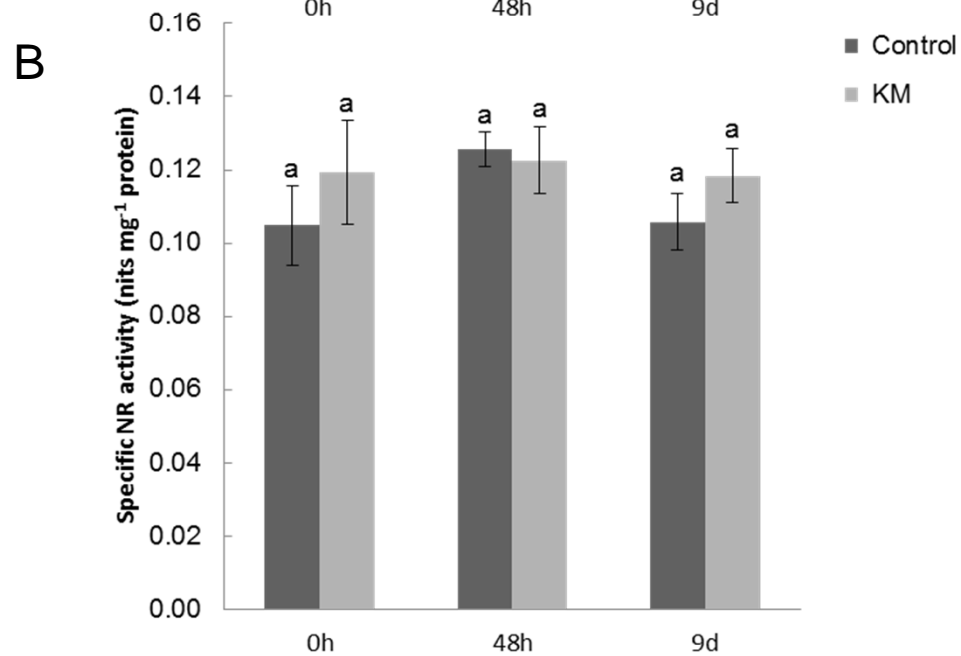

**Supplementary Fig. S2.** Effect of  $10^{-8}$ M KM pre-treatment in (A) NO content and (B) nitrate reductase (NR) activity measurements in leaves of control (0 d), short (2 d) and long term (9 d)  $10^{-8}$ M KM-treated *M. truncatula* plants. Data denoted with asterisks are statistically different to respective control samples (0 d) according to Tukey's pairwise comparison test ( $p < 0.05$ ).

D\_KM vs. D

S\_KM vs. S

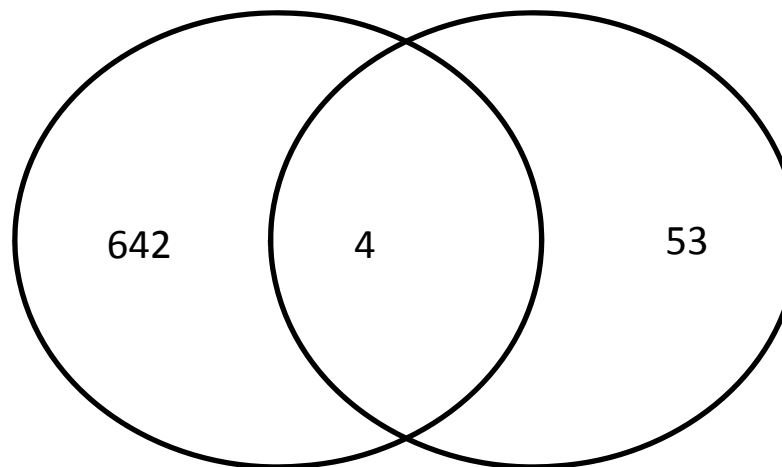

**Supplementary Fig. S3.** Venn diagram showing number of significantly regulated transcripts in drought-stressed samples vs. samples pre-treated with KM followed by drought (D\_KM vs D) and salt-stressed samples vs. pre-treatment with KM and subsequent salt stress (S\_KM vs S). Overlap signifies commonly regulated transcripts (FDR:  $P < 0.05$ ).

**Supplementary Fig. S4.** Metabolite profiling of drought (A) and salinity (B) stressed samples compared with respective drought and salinity stressed samples following  $10^{-8}$  M KM pre-treatment in leaves of *M. truncatula* plants. (C) Metabolite profiling of pre-treated KM plants after 0 d (control), 2 d (short-term) and 9 d (long-term) KM foliar application in *M. truncatula* plants growing under normal conditions.

## Alanine

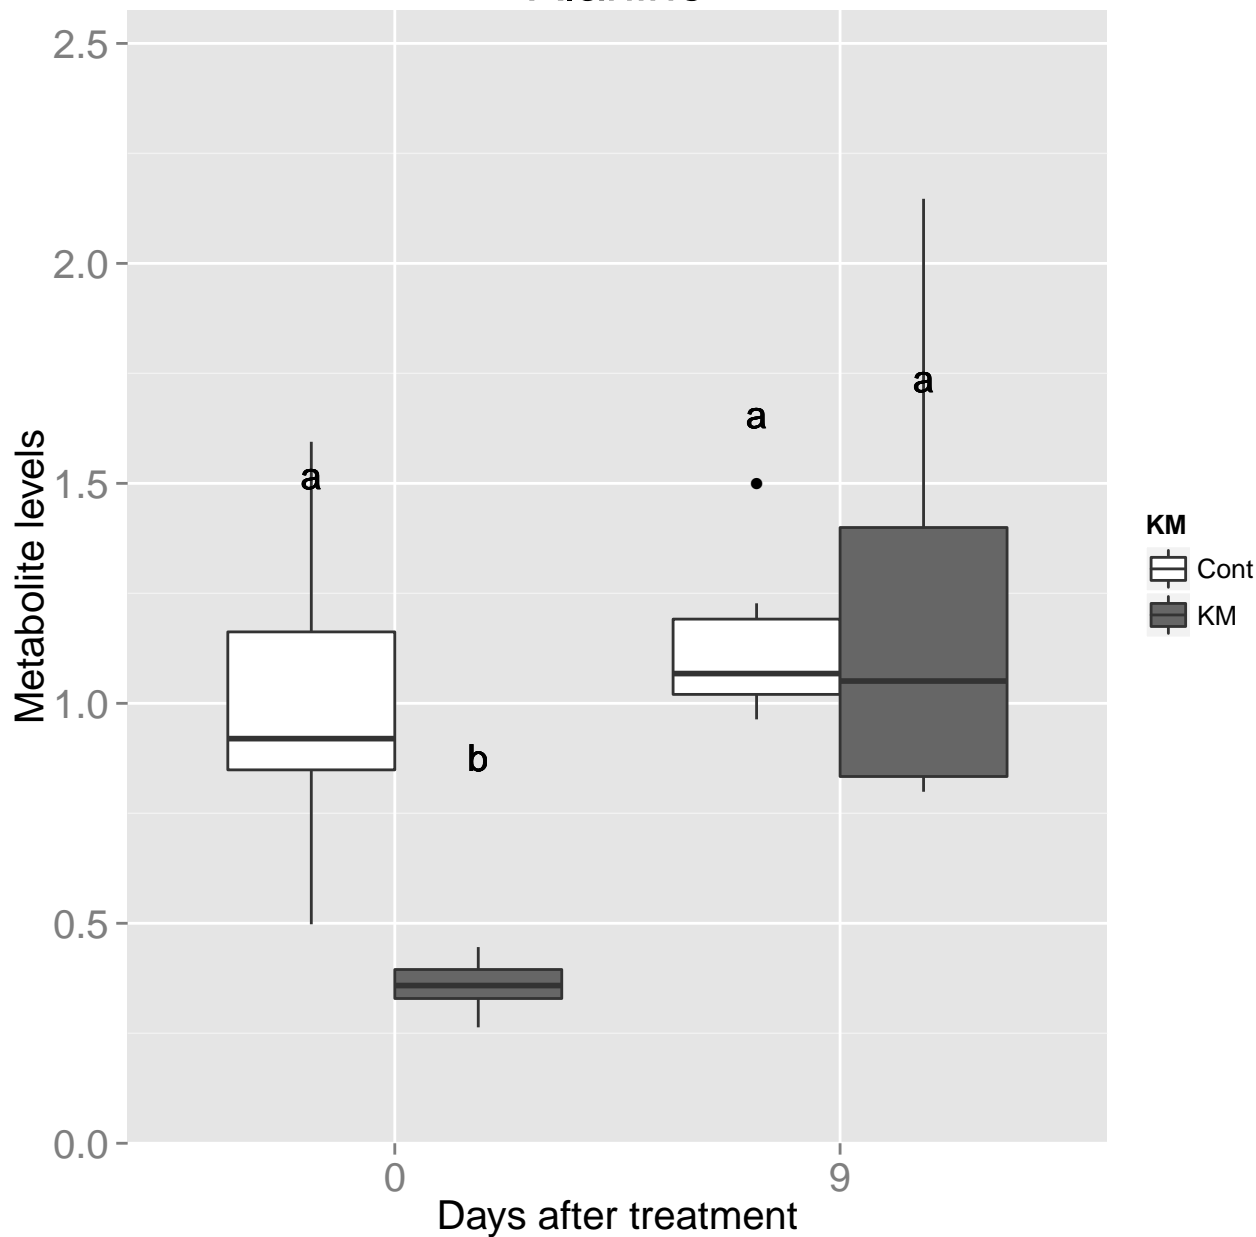

# Pyruvate

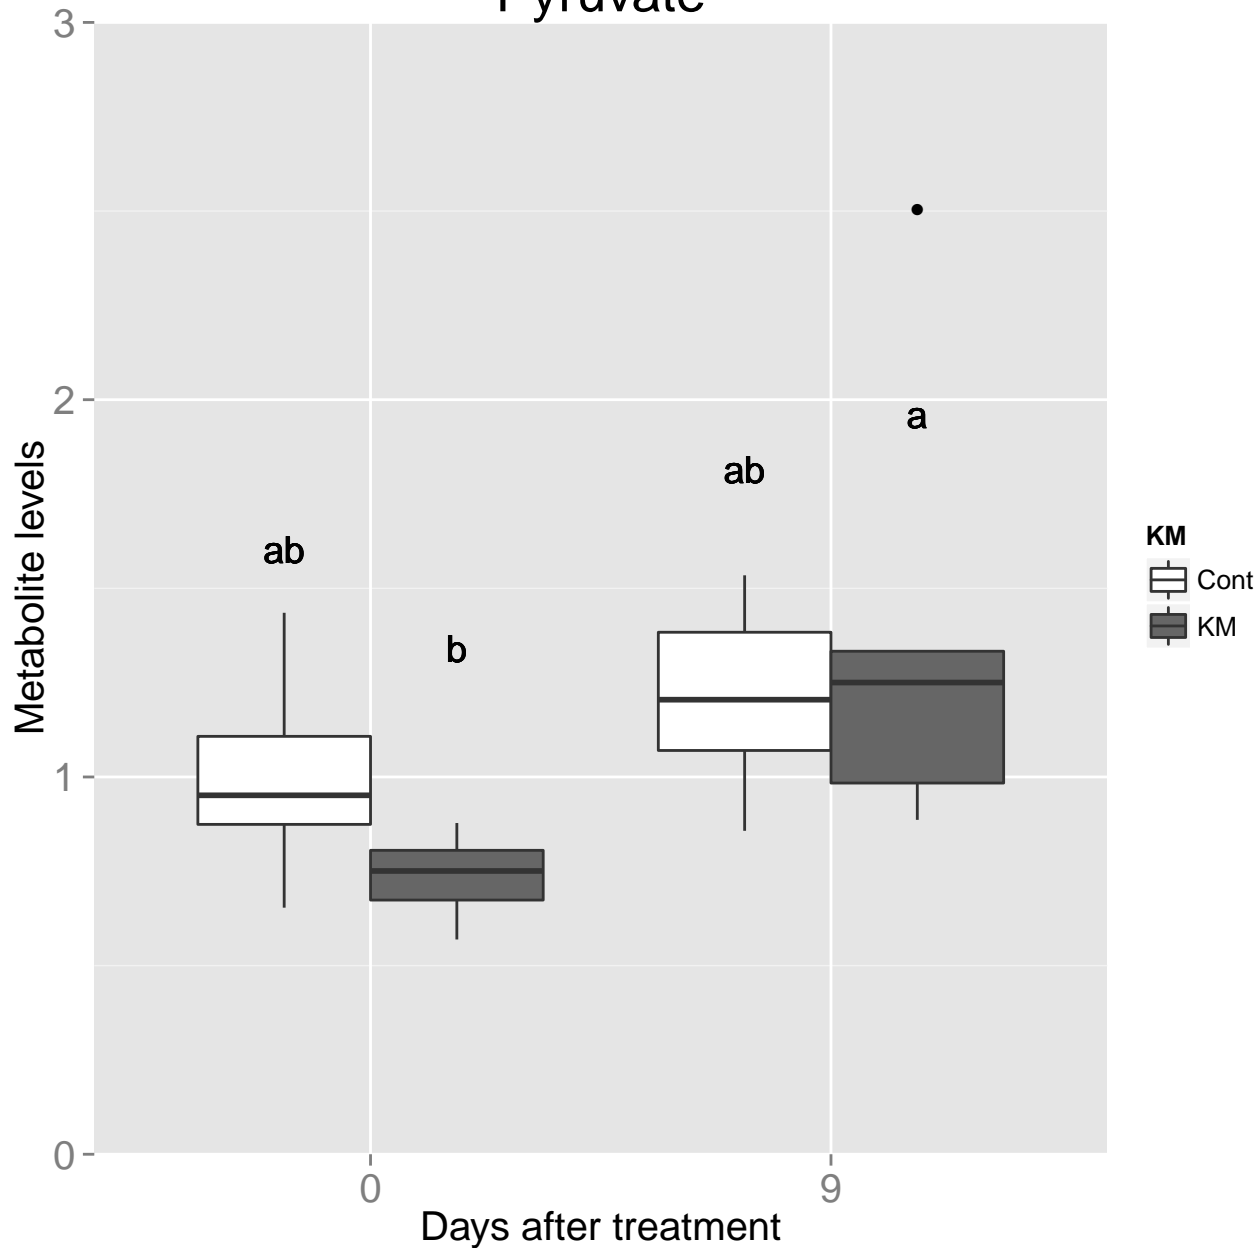

# Valine

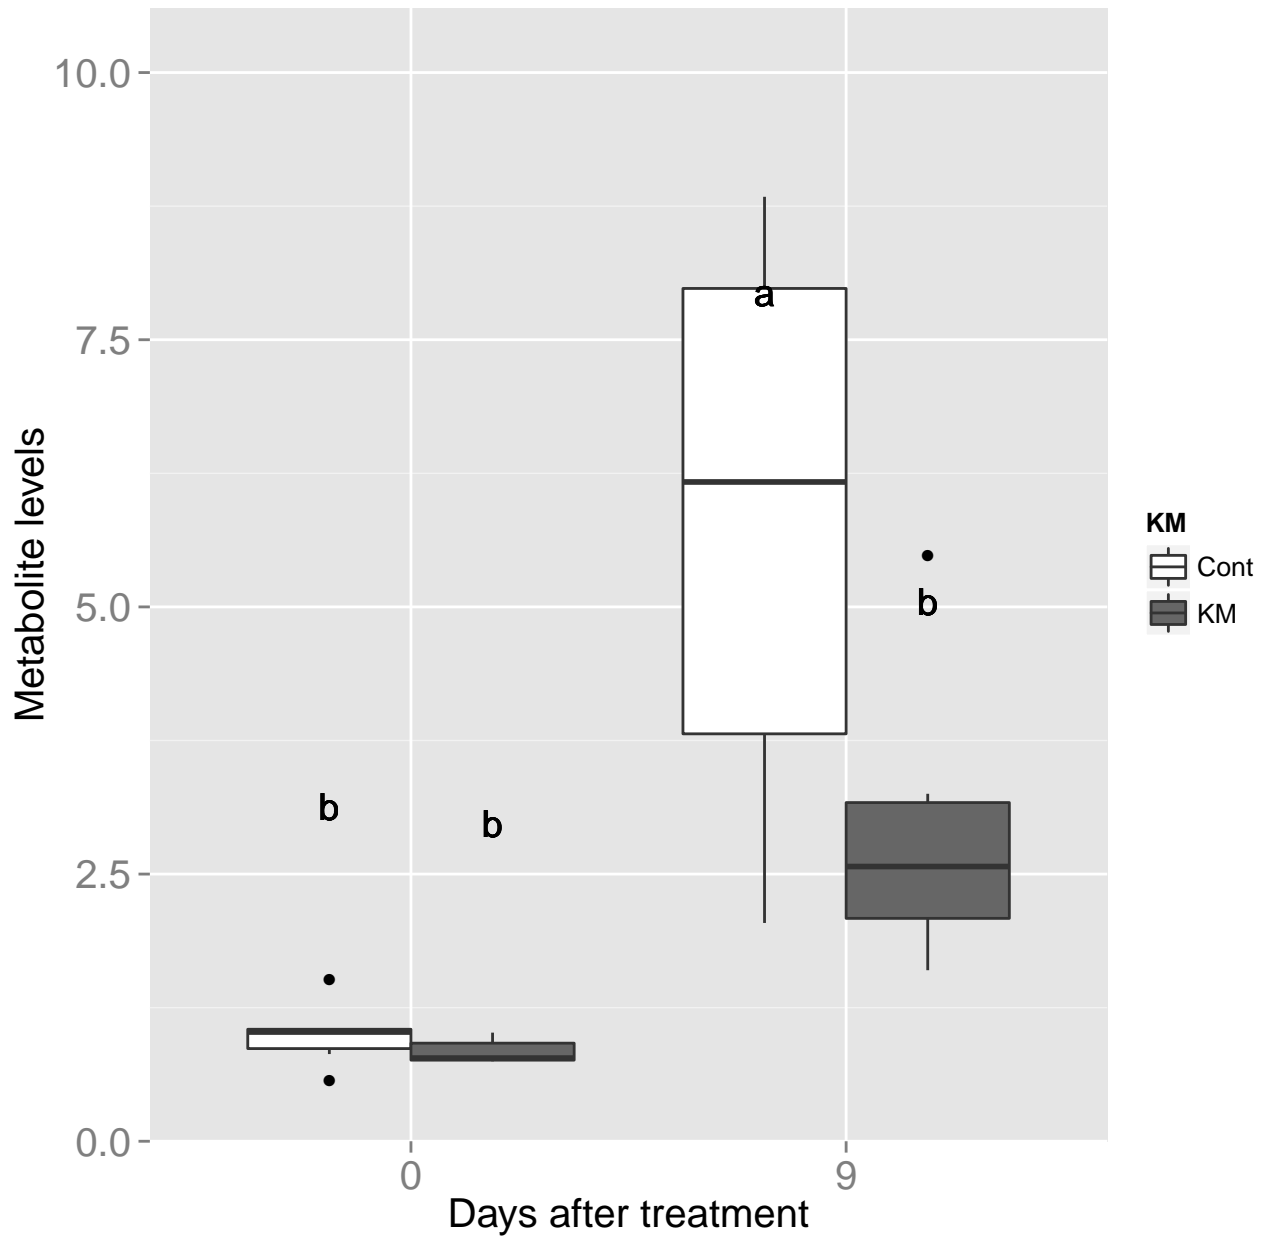



# Glycerol

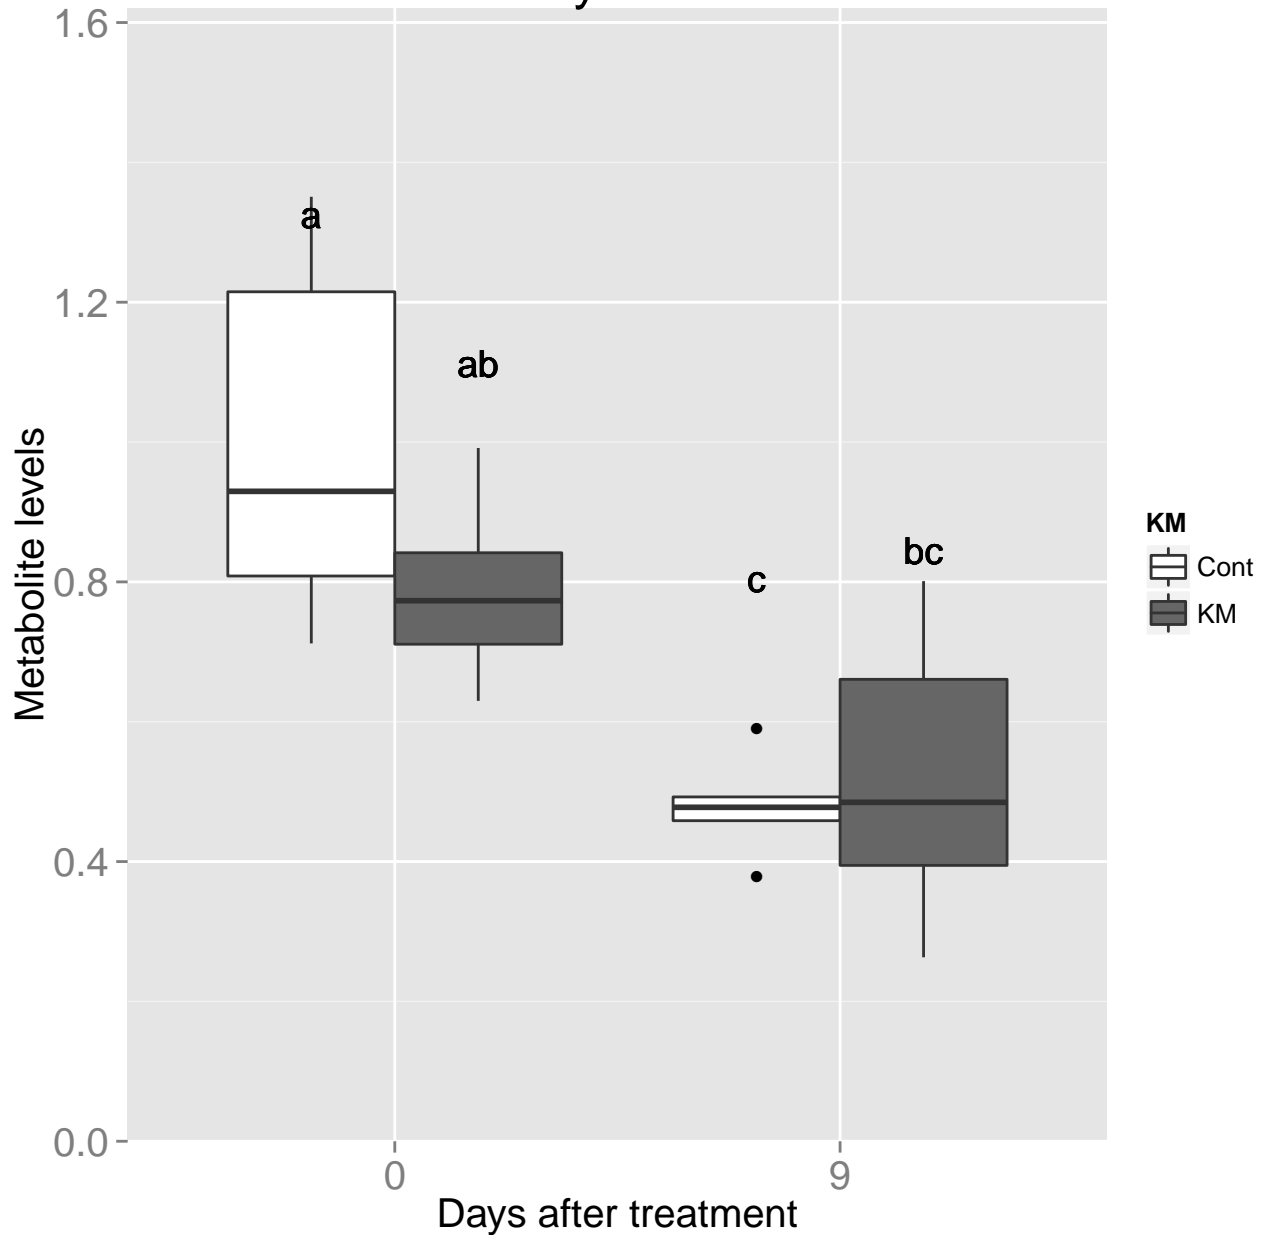

# Malonate

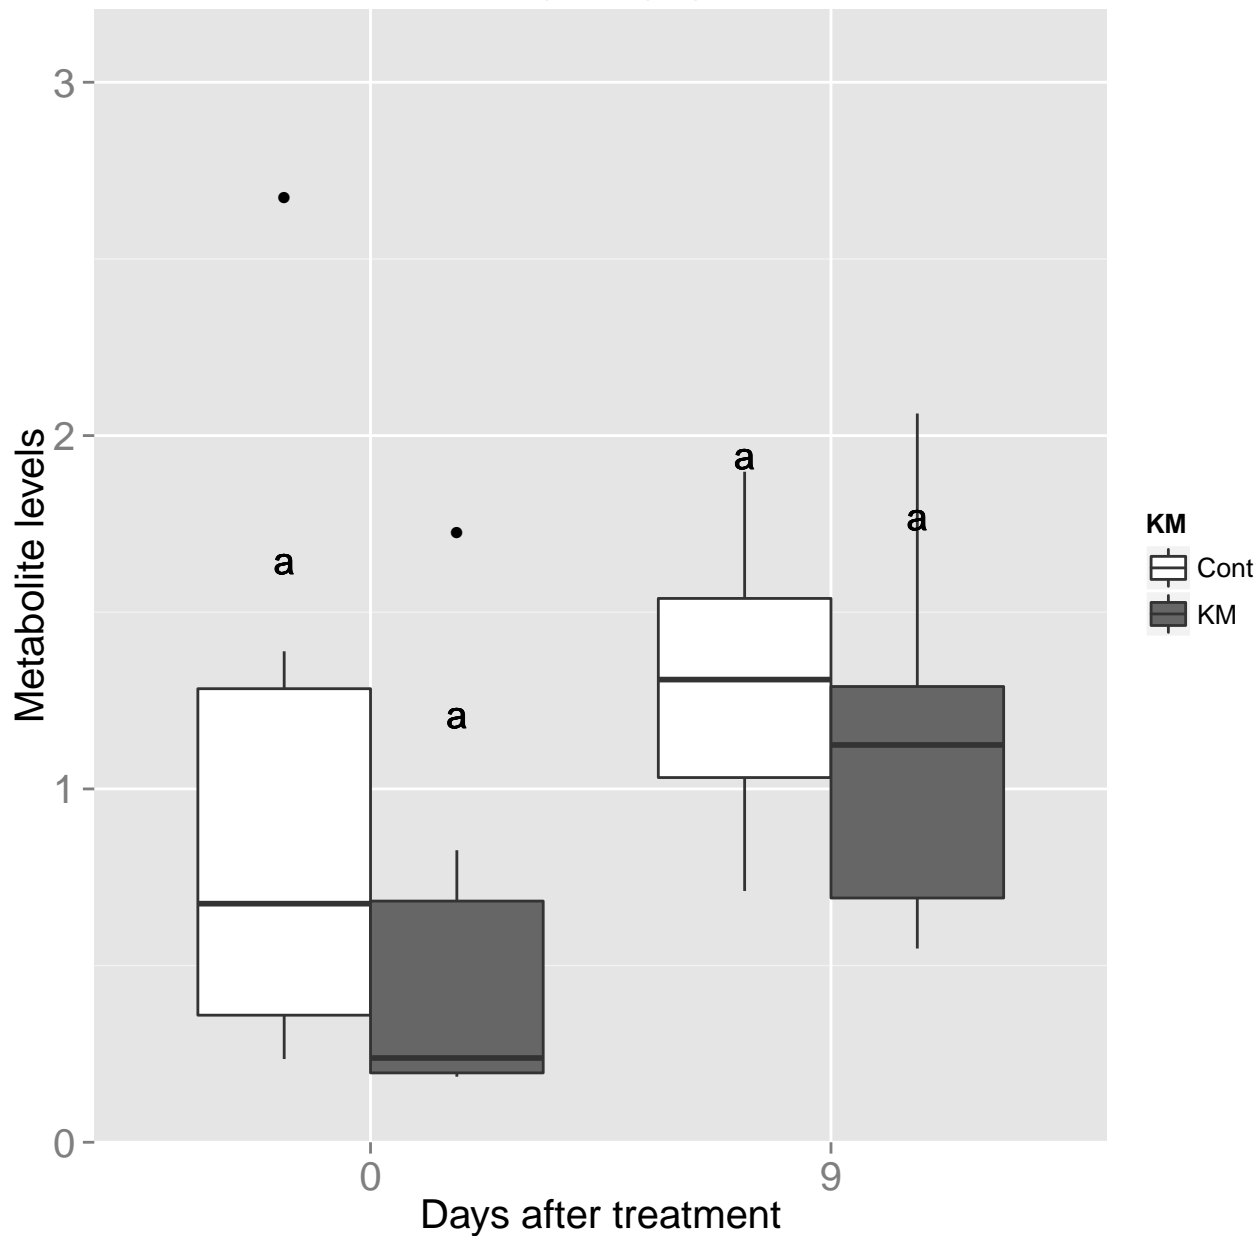

# Isoleucine

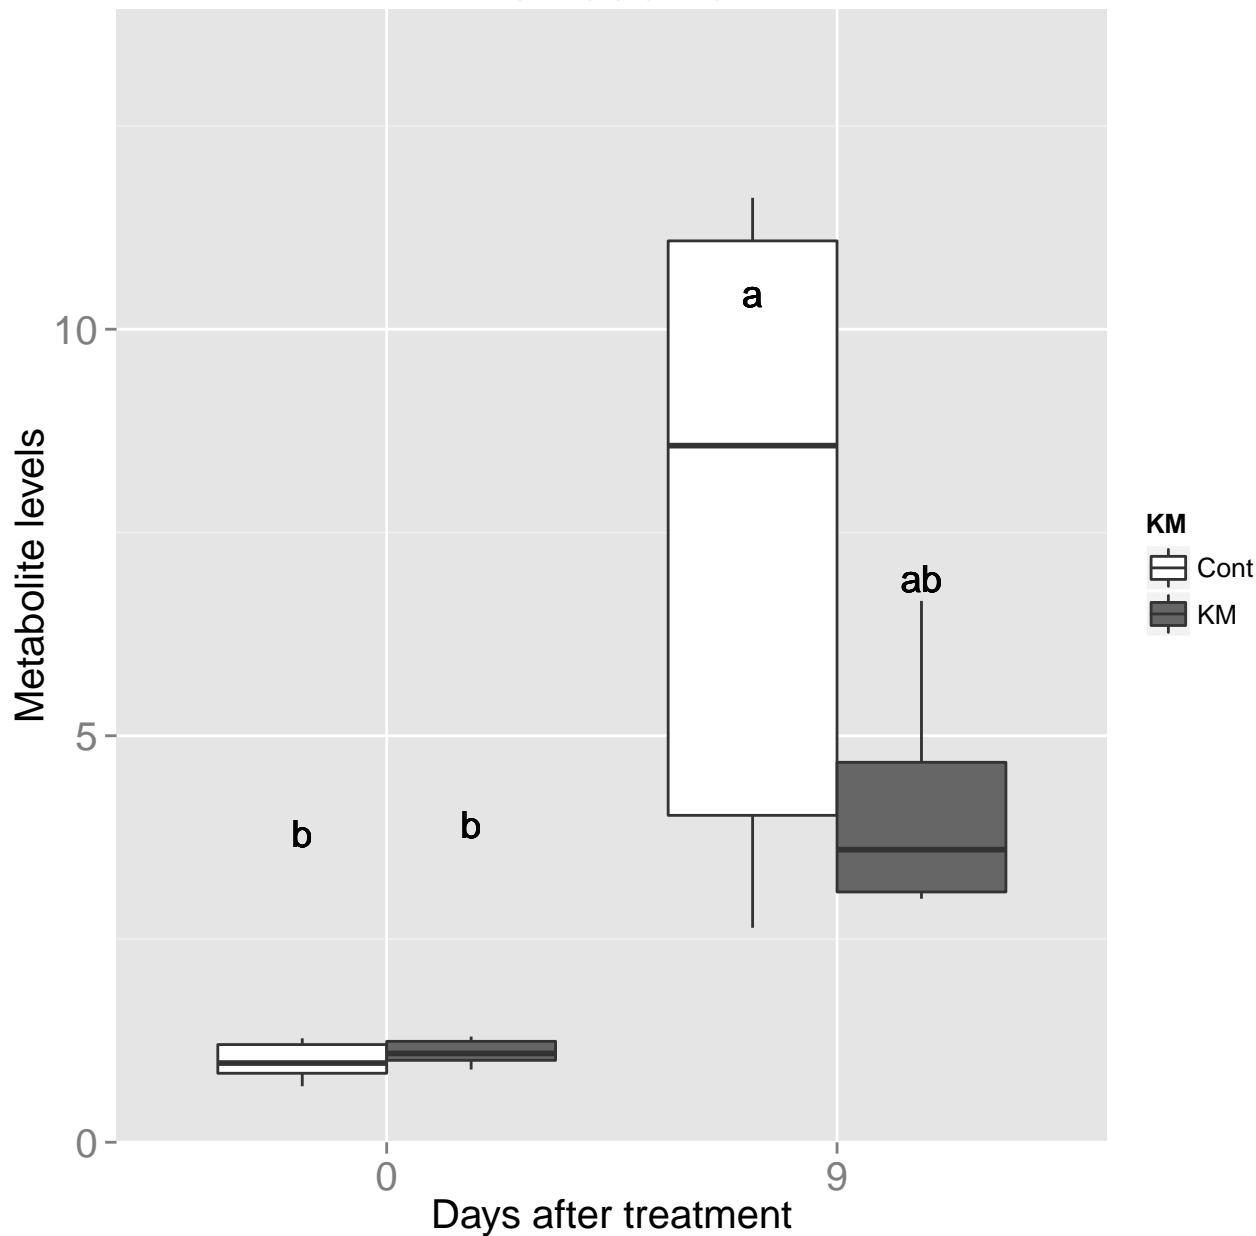

# Glycine

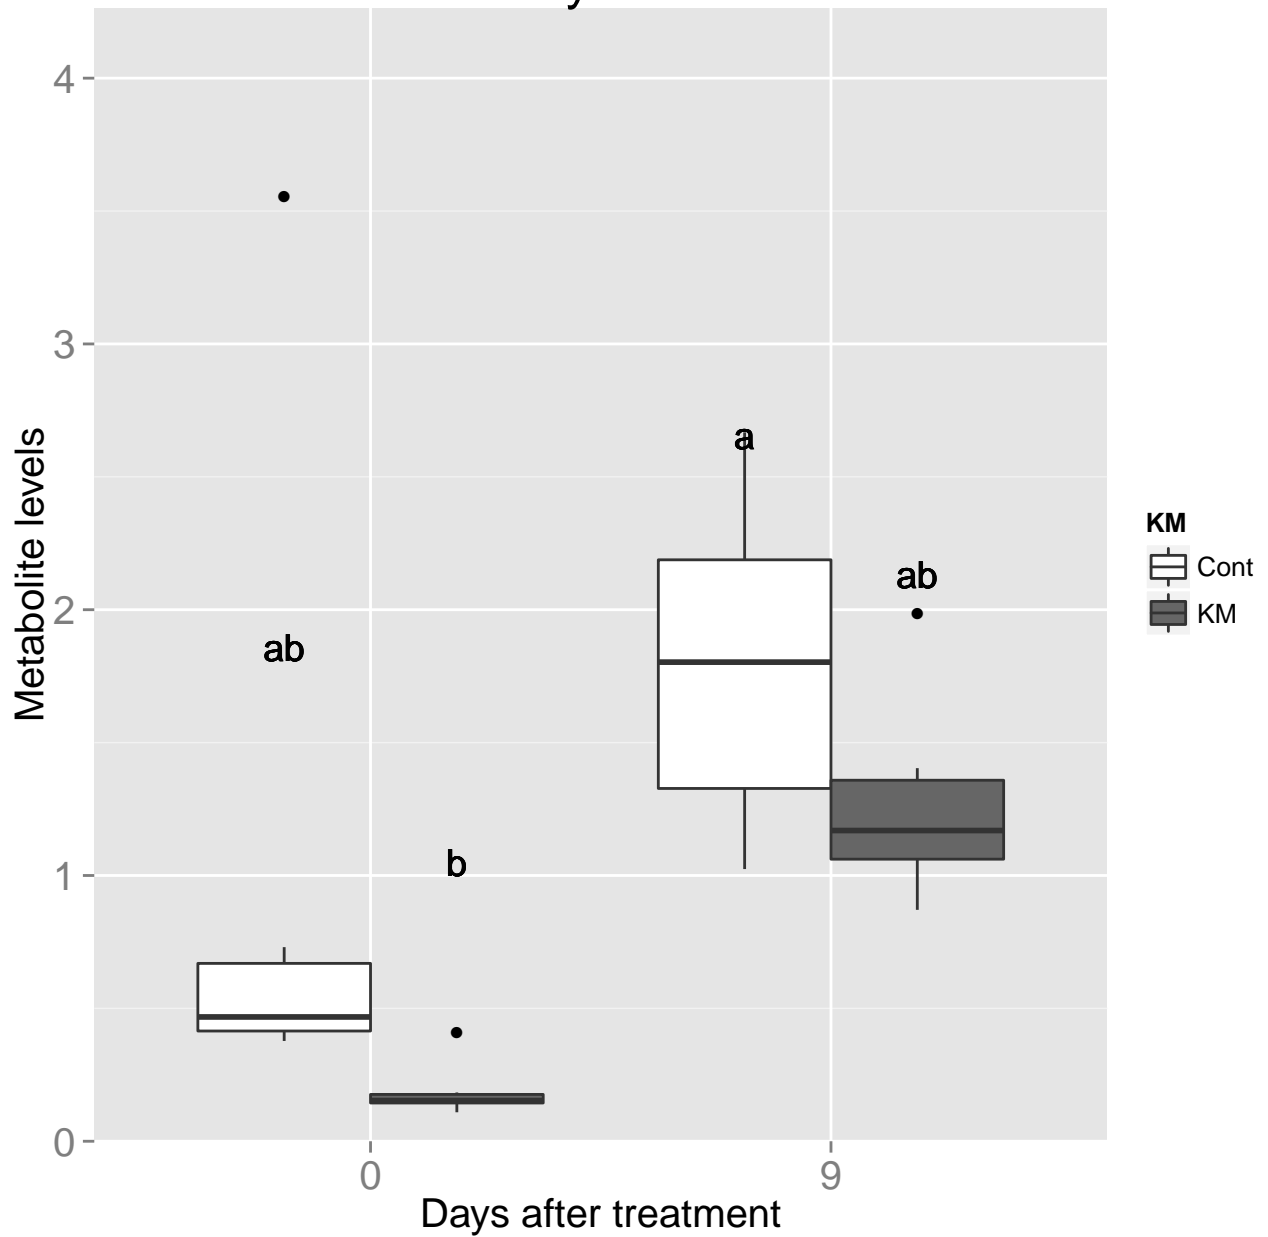

# Phosphate

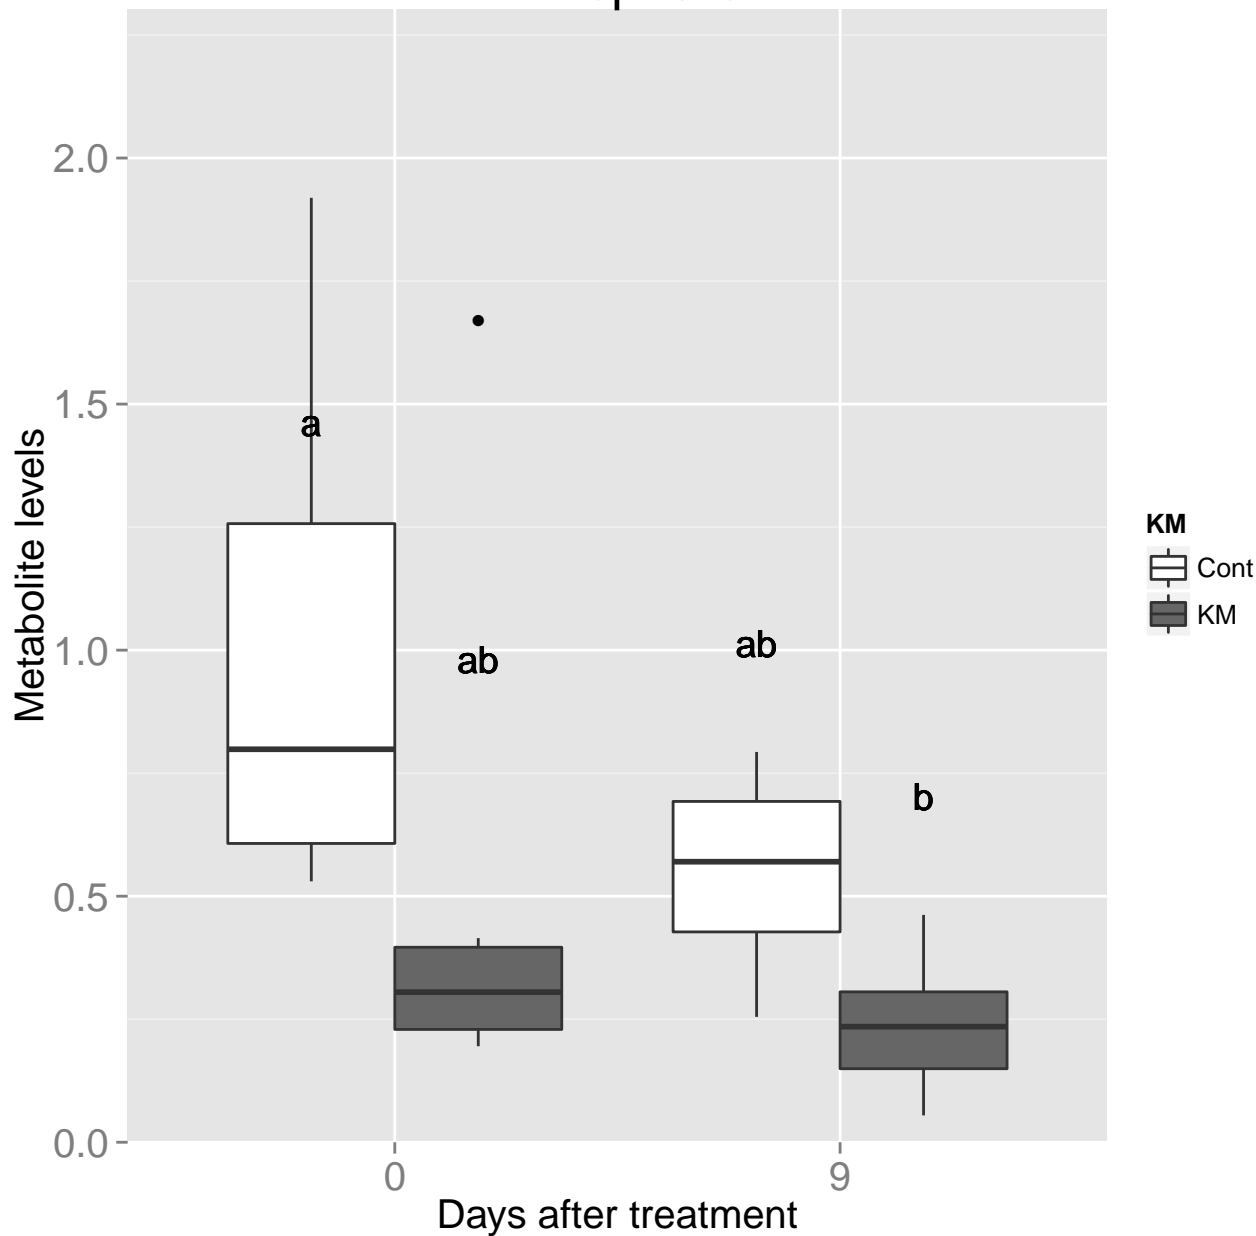

# Proline

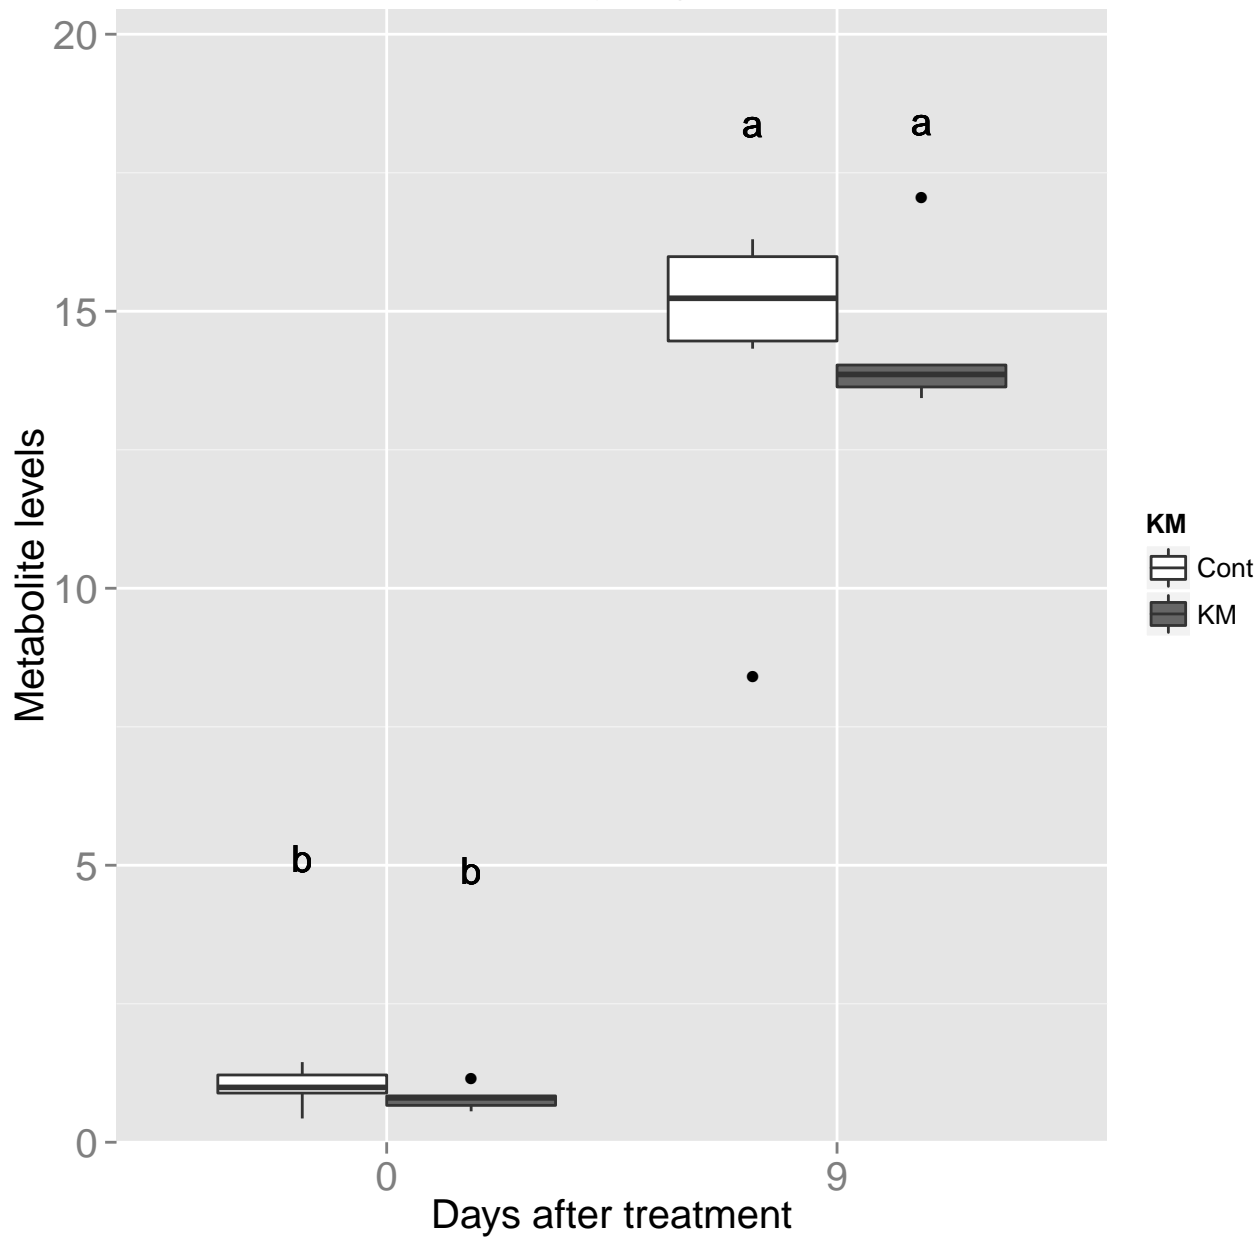

# Glycerate

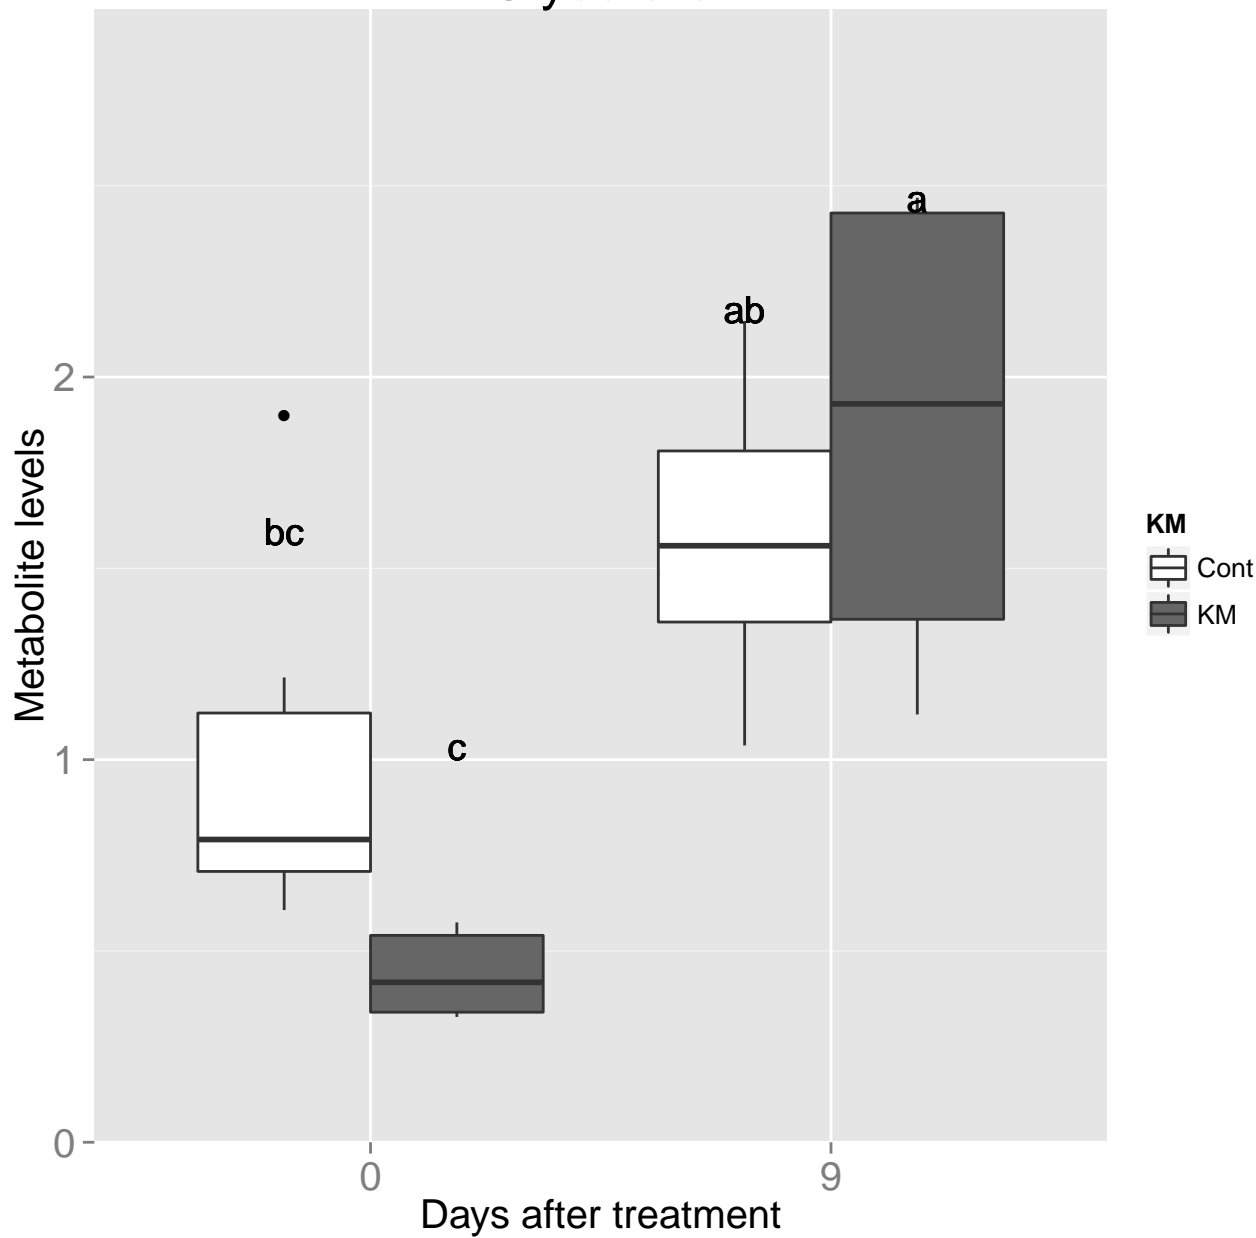

# Benzoate

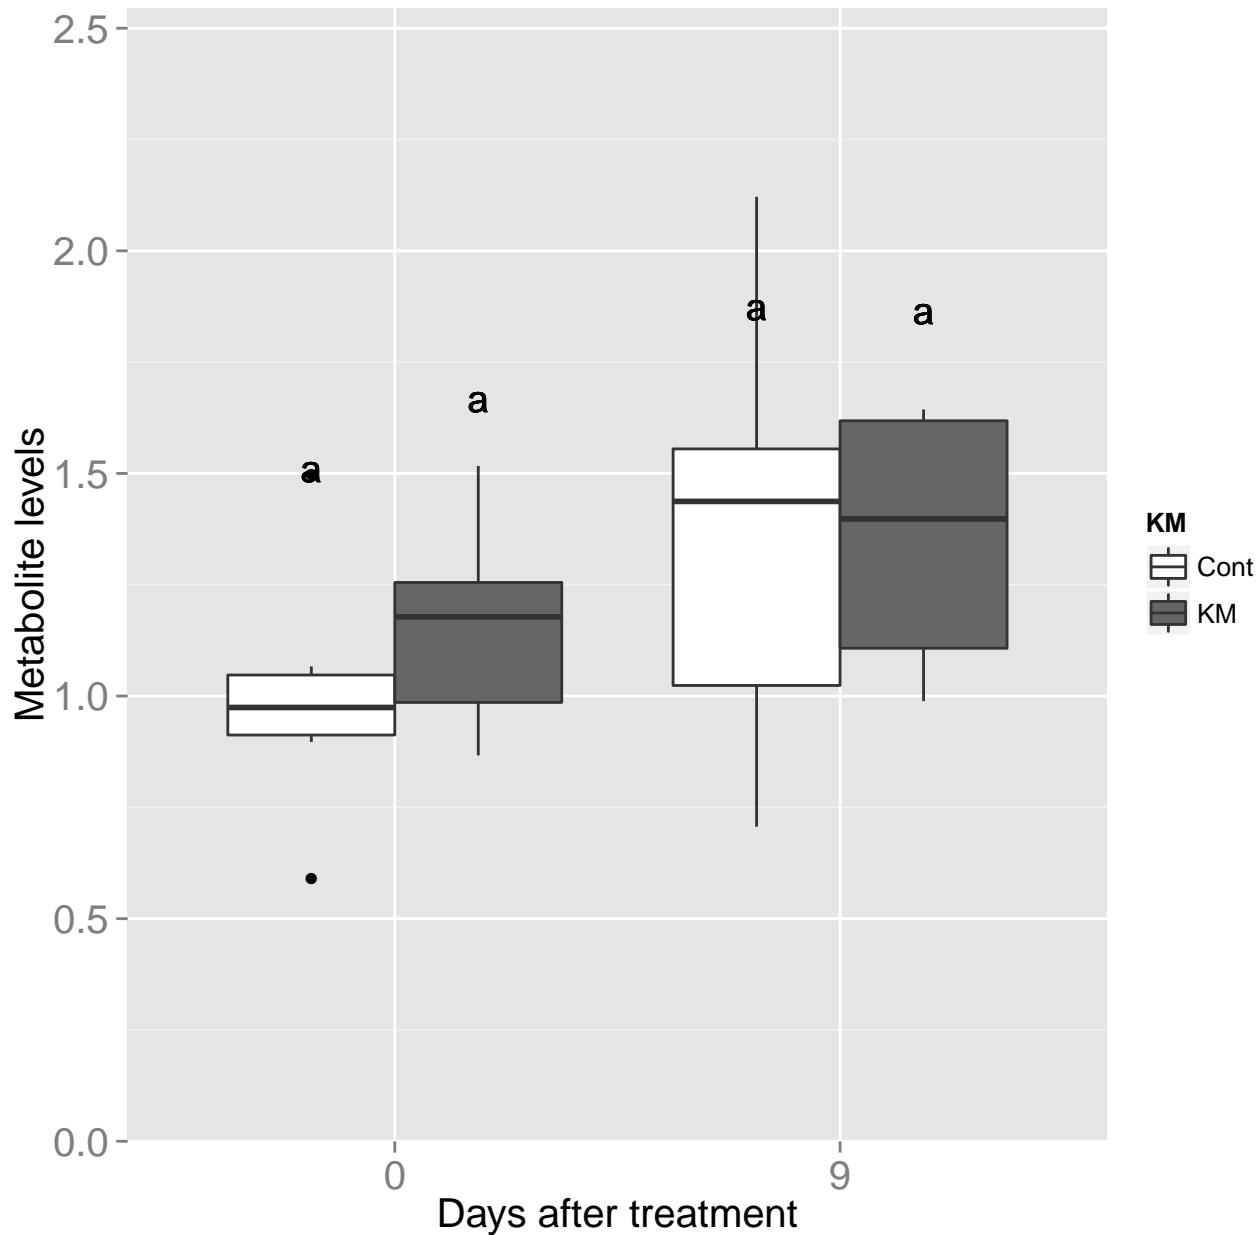



# Serine

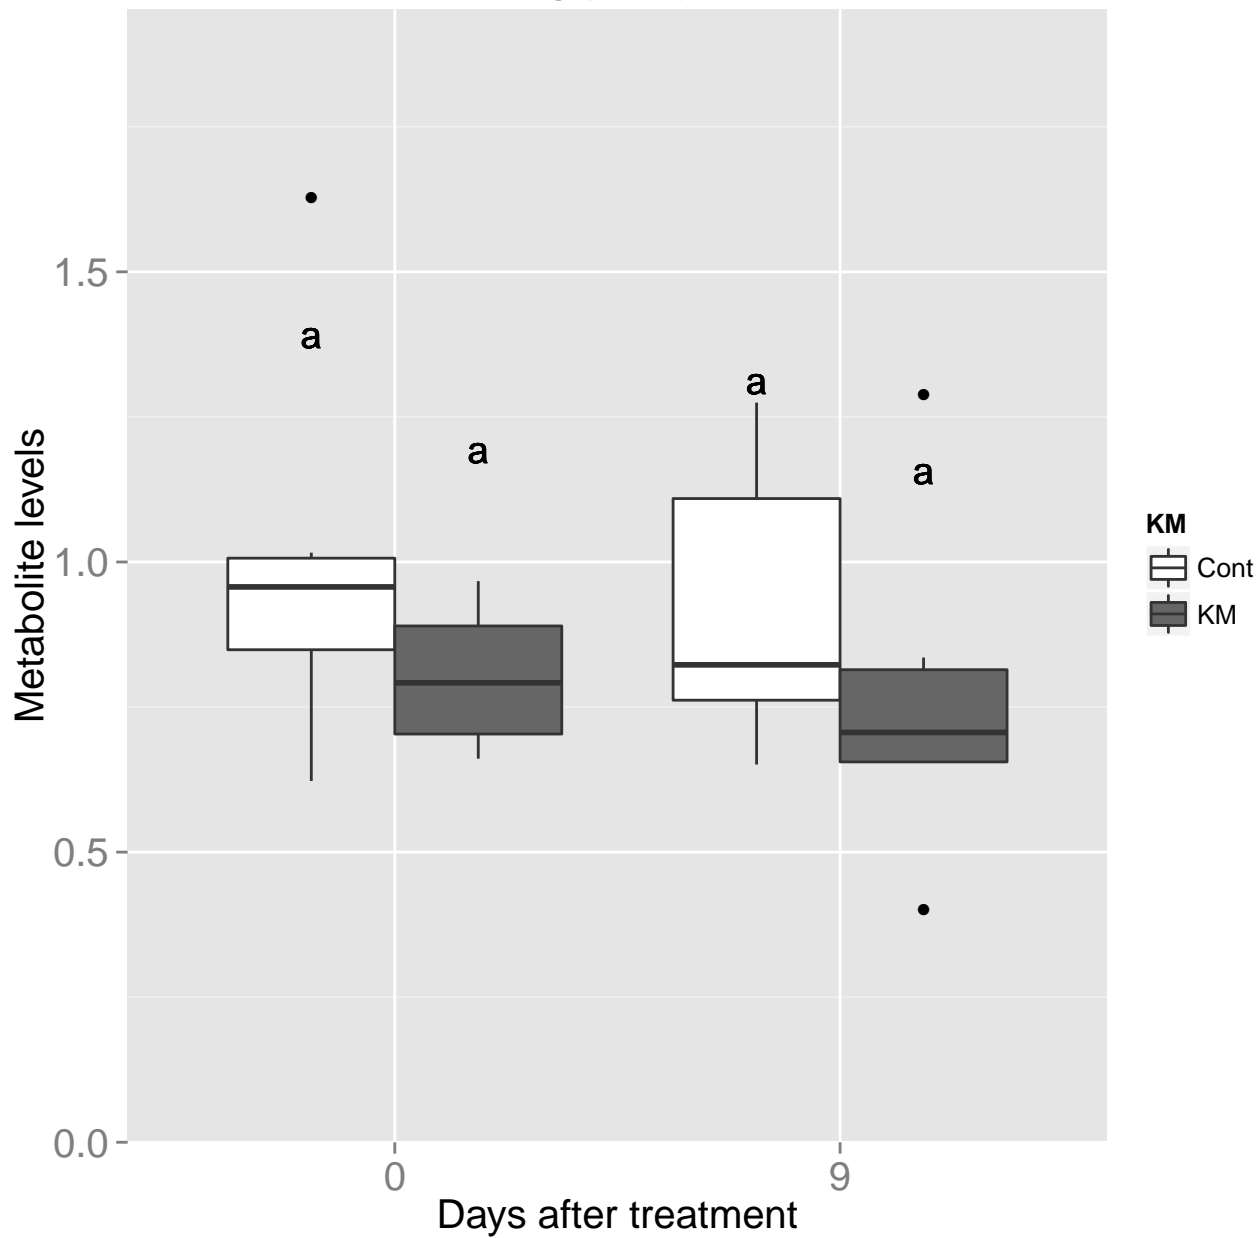

# Succinate

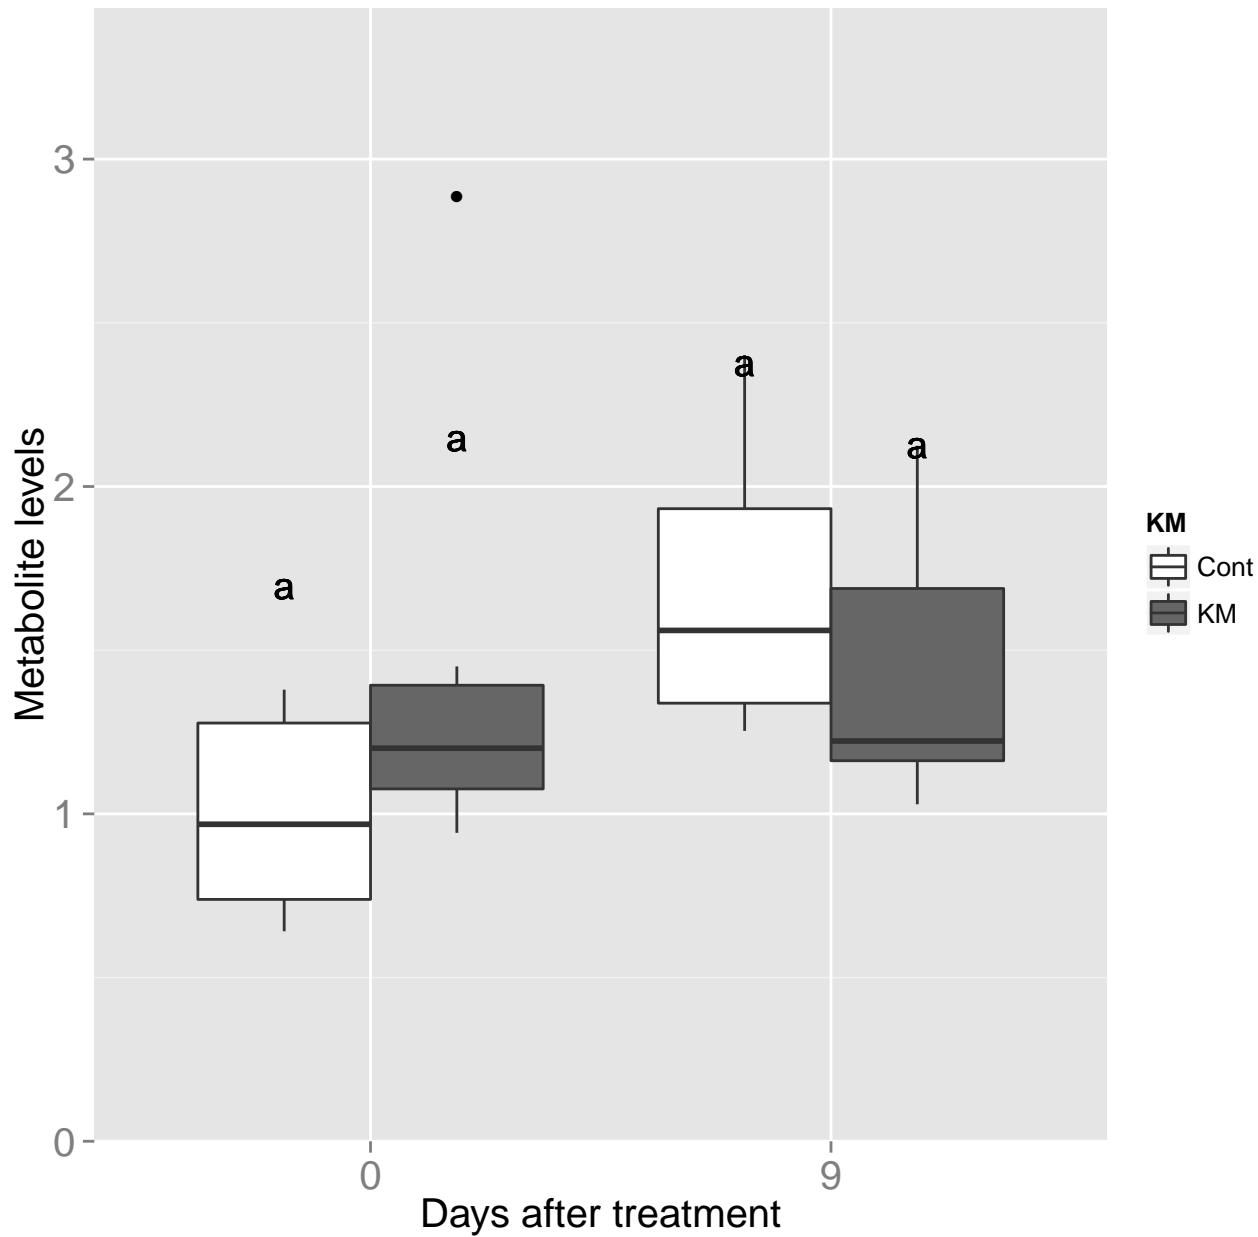

# Threonine

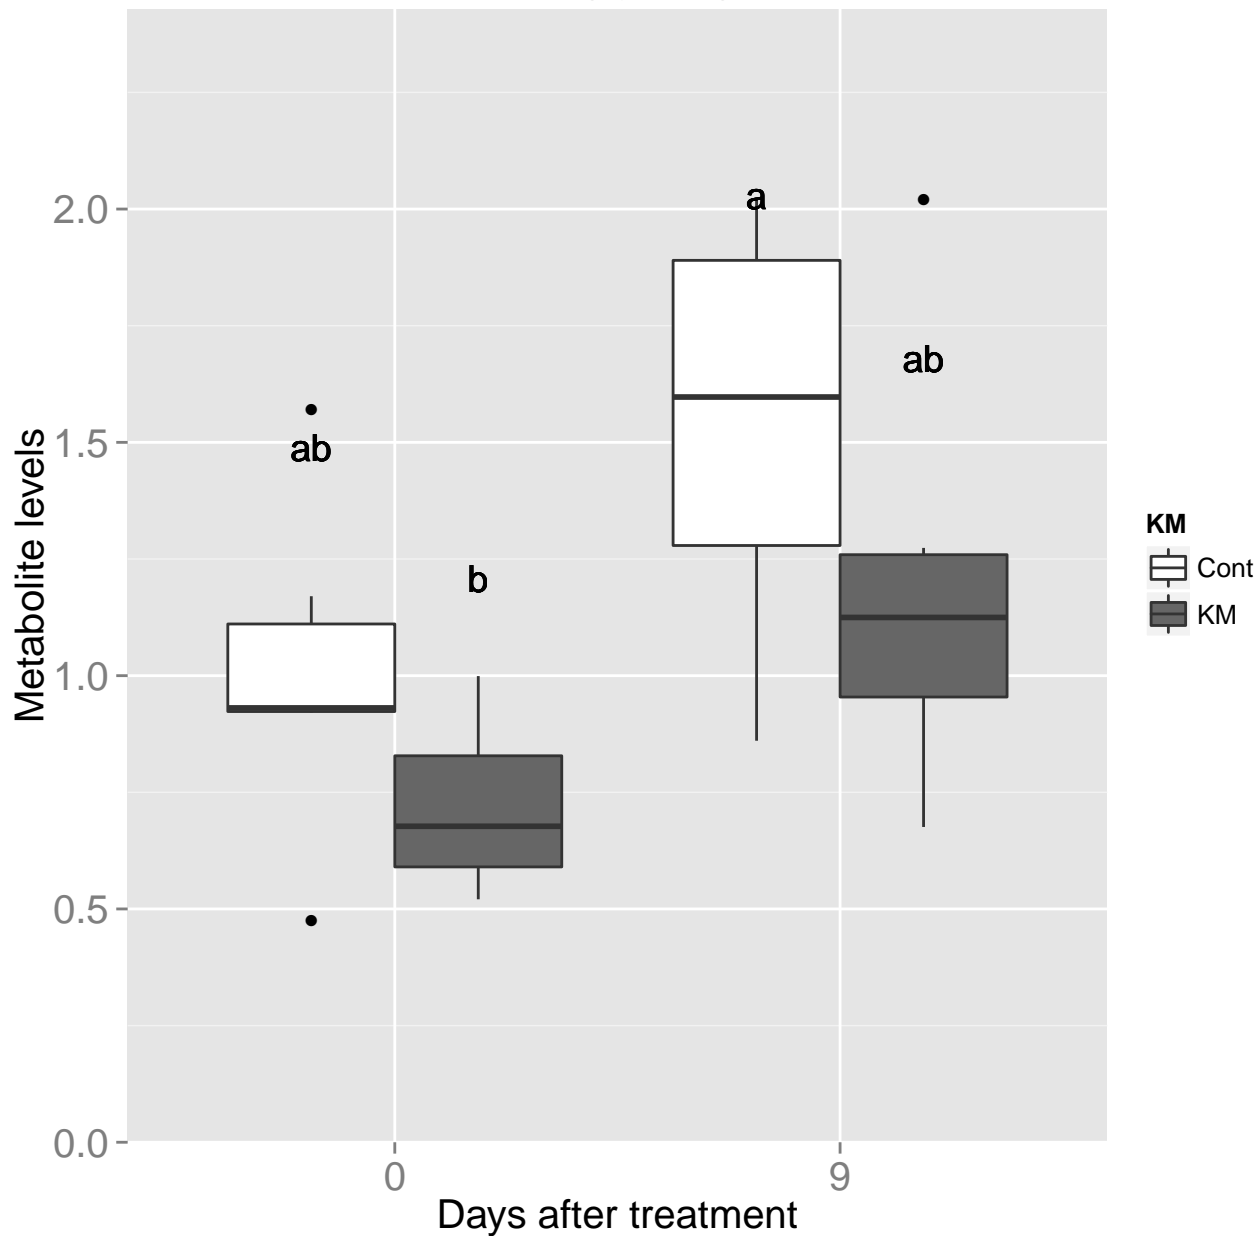

# Nicotinate

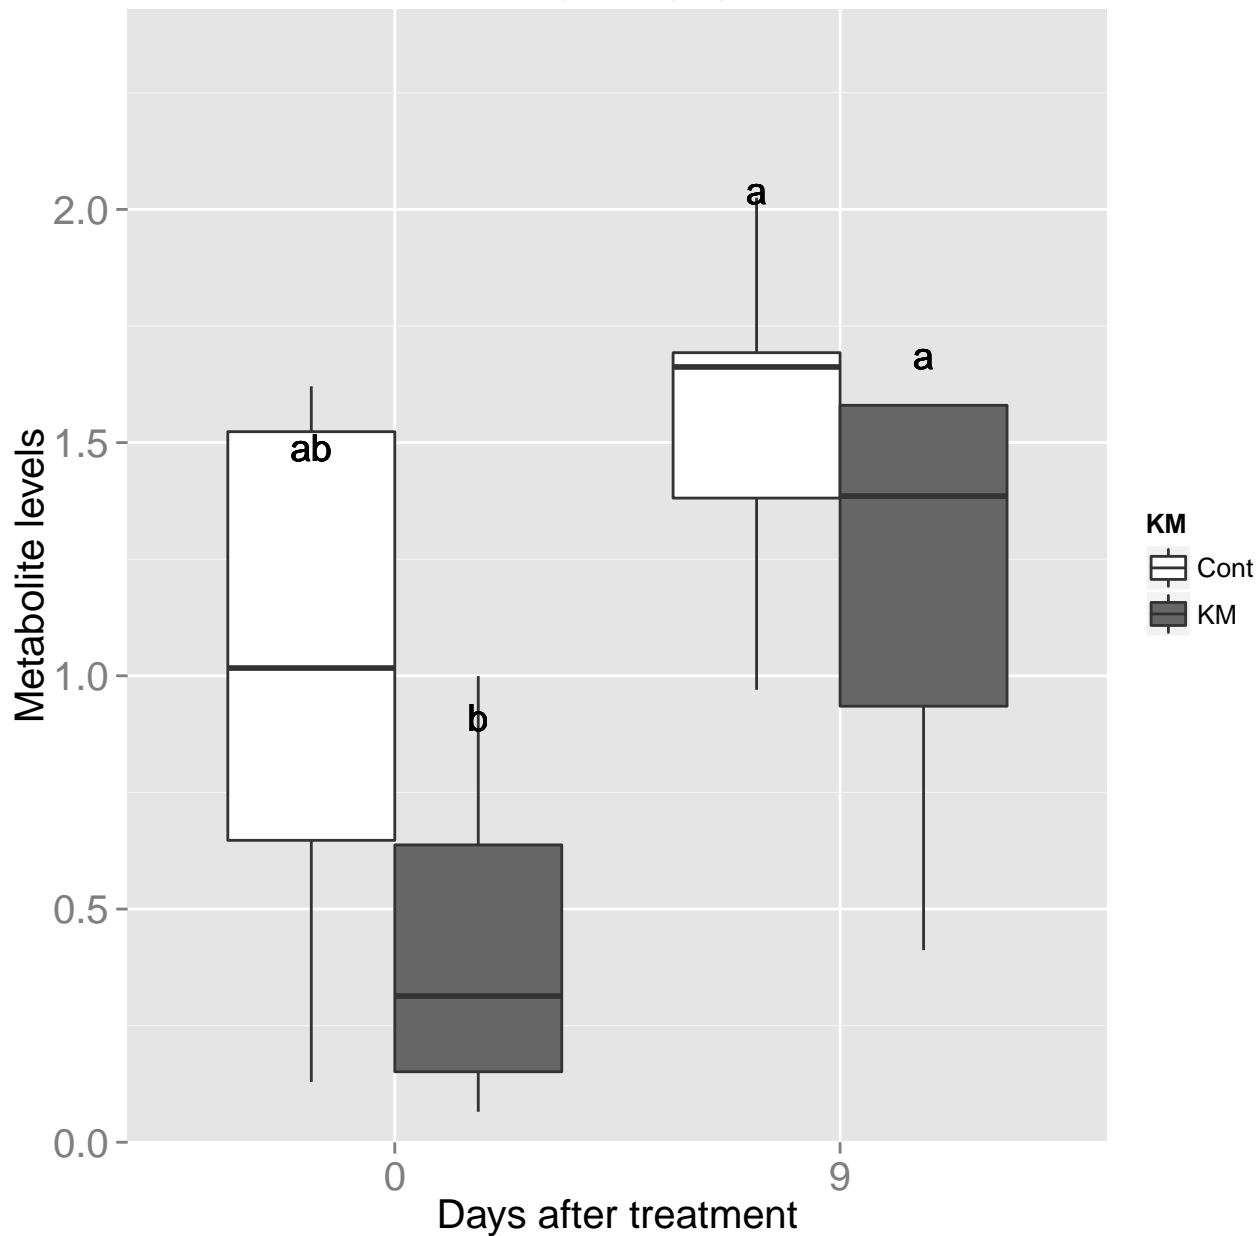

# beta.alanine

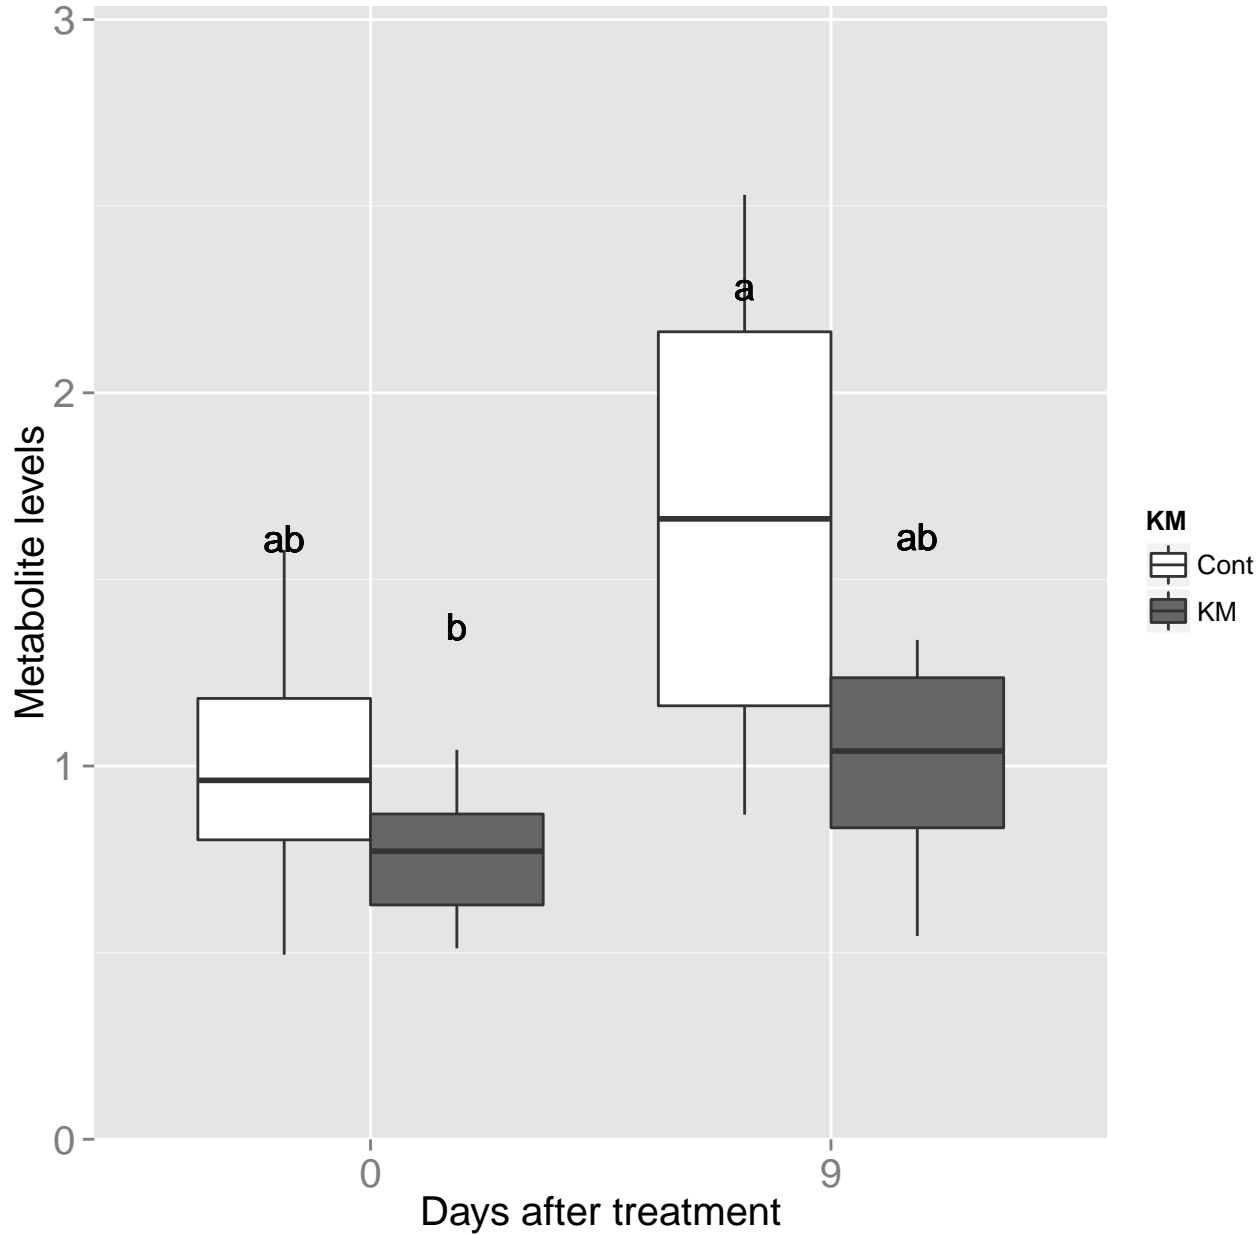

# Erythritol

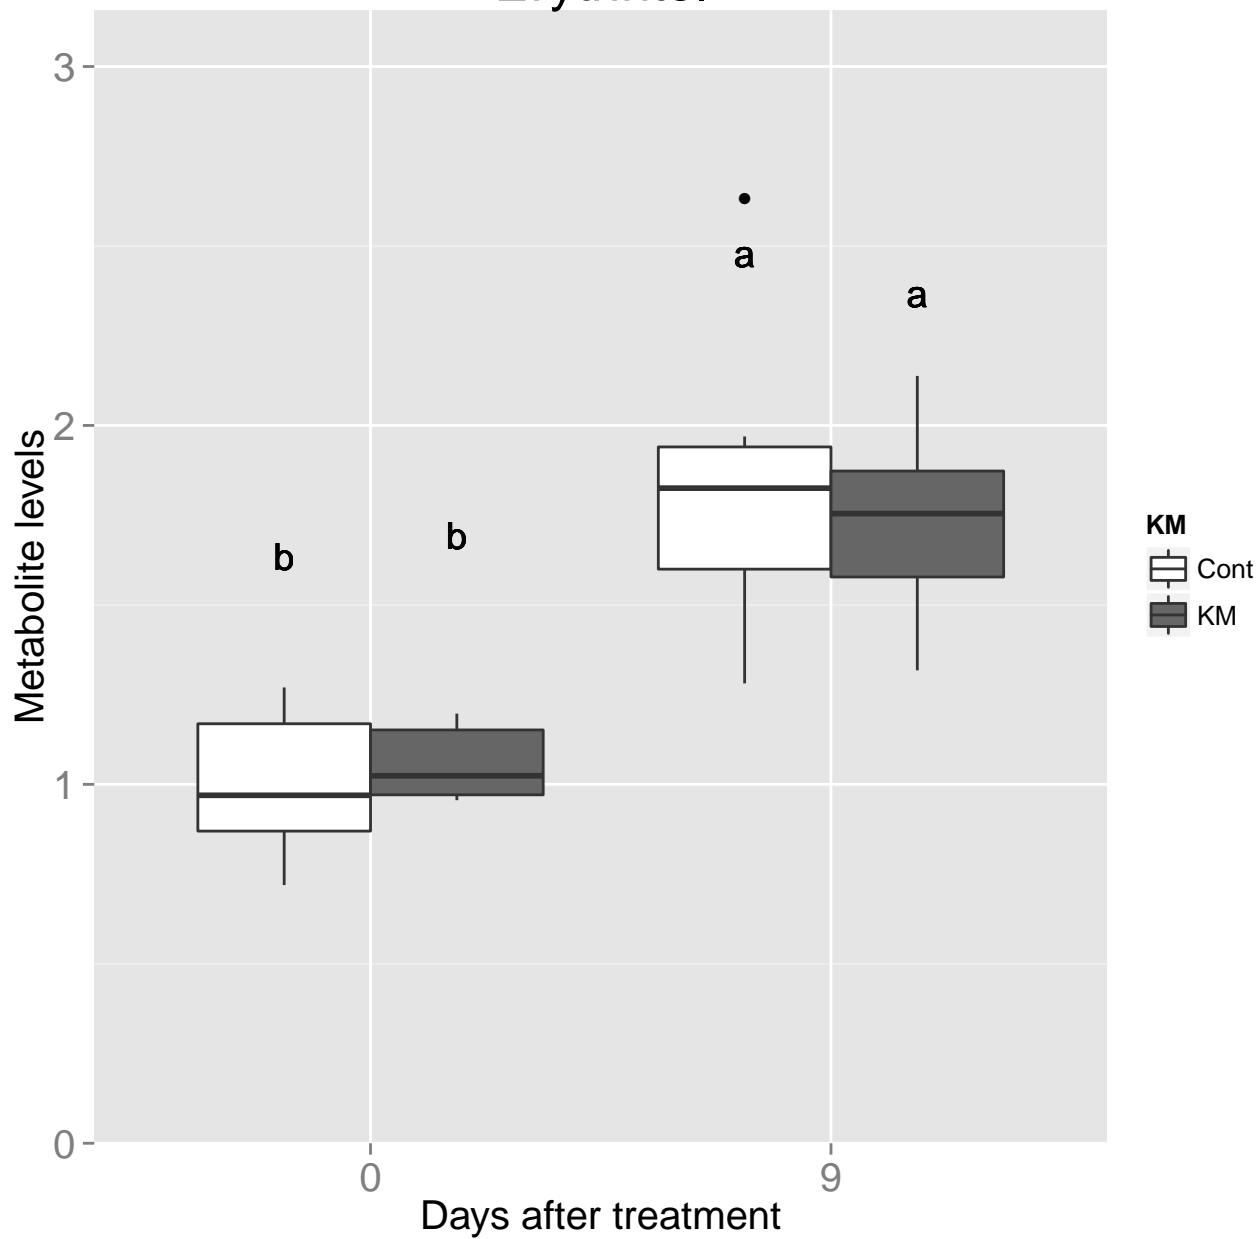

# Malate

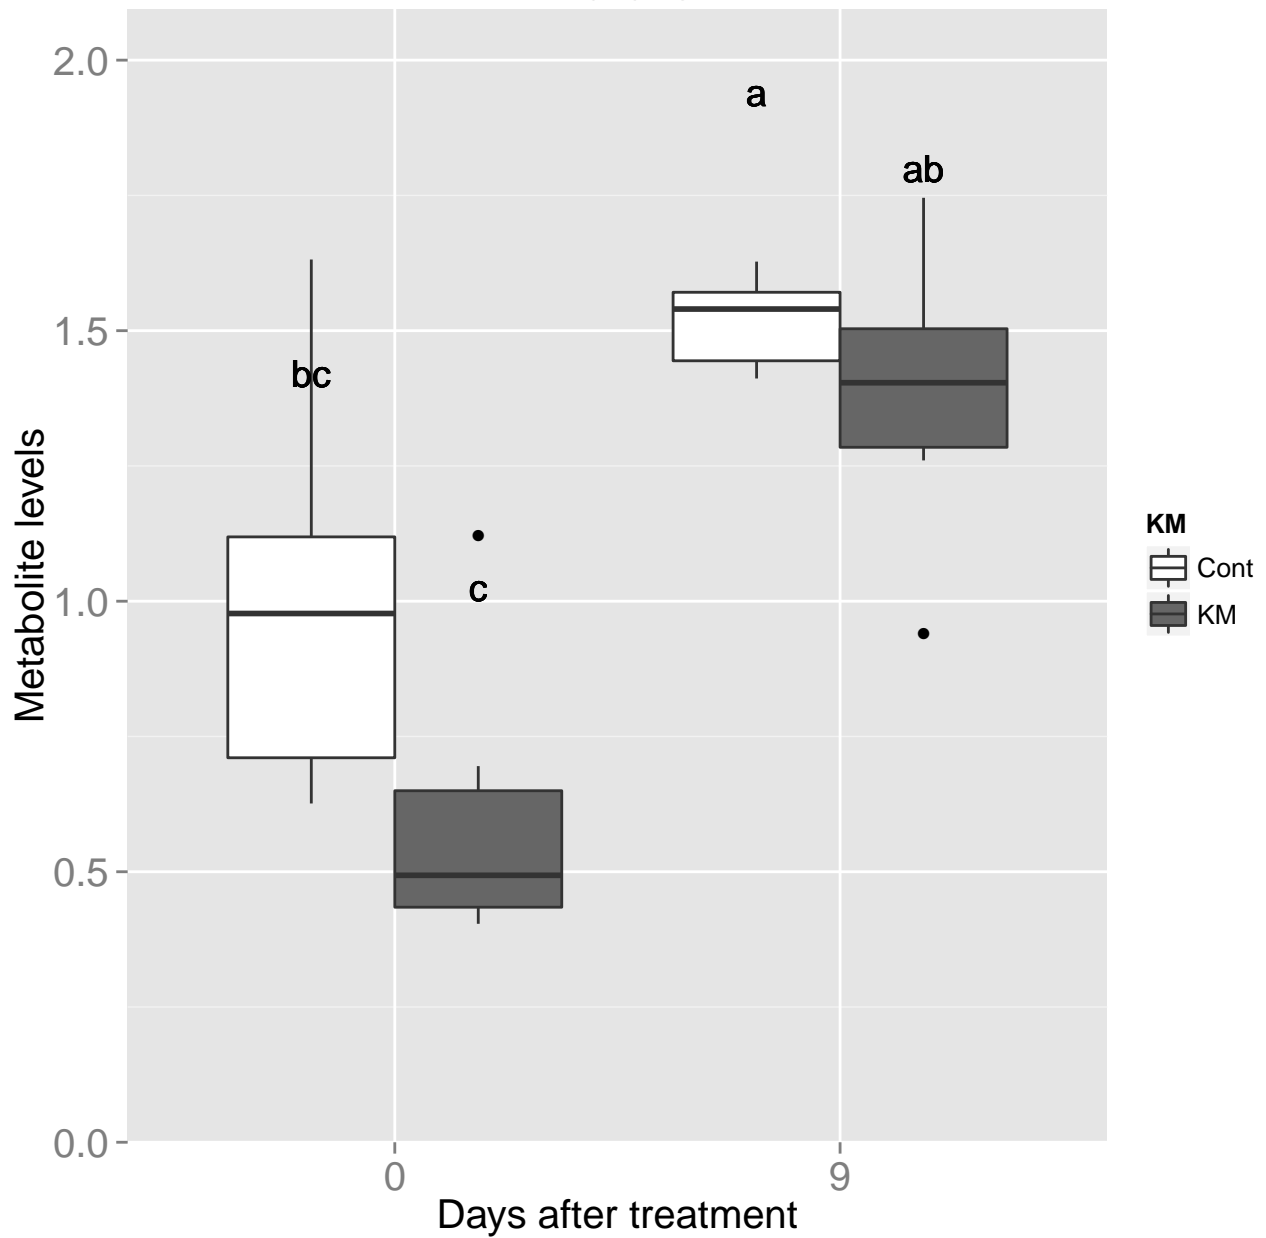

# Erythronate

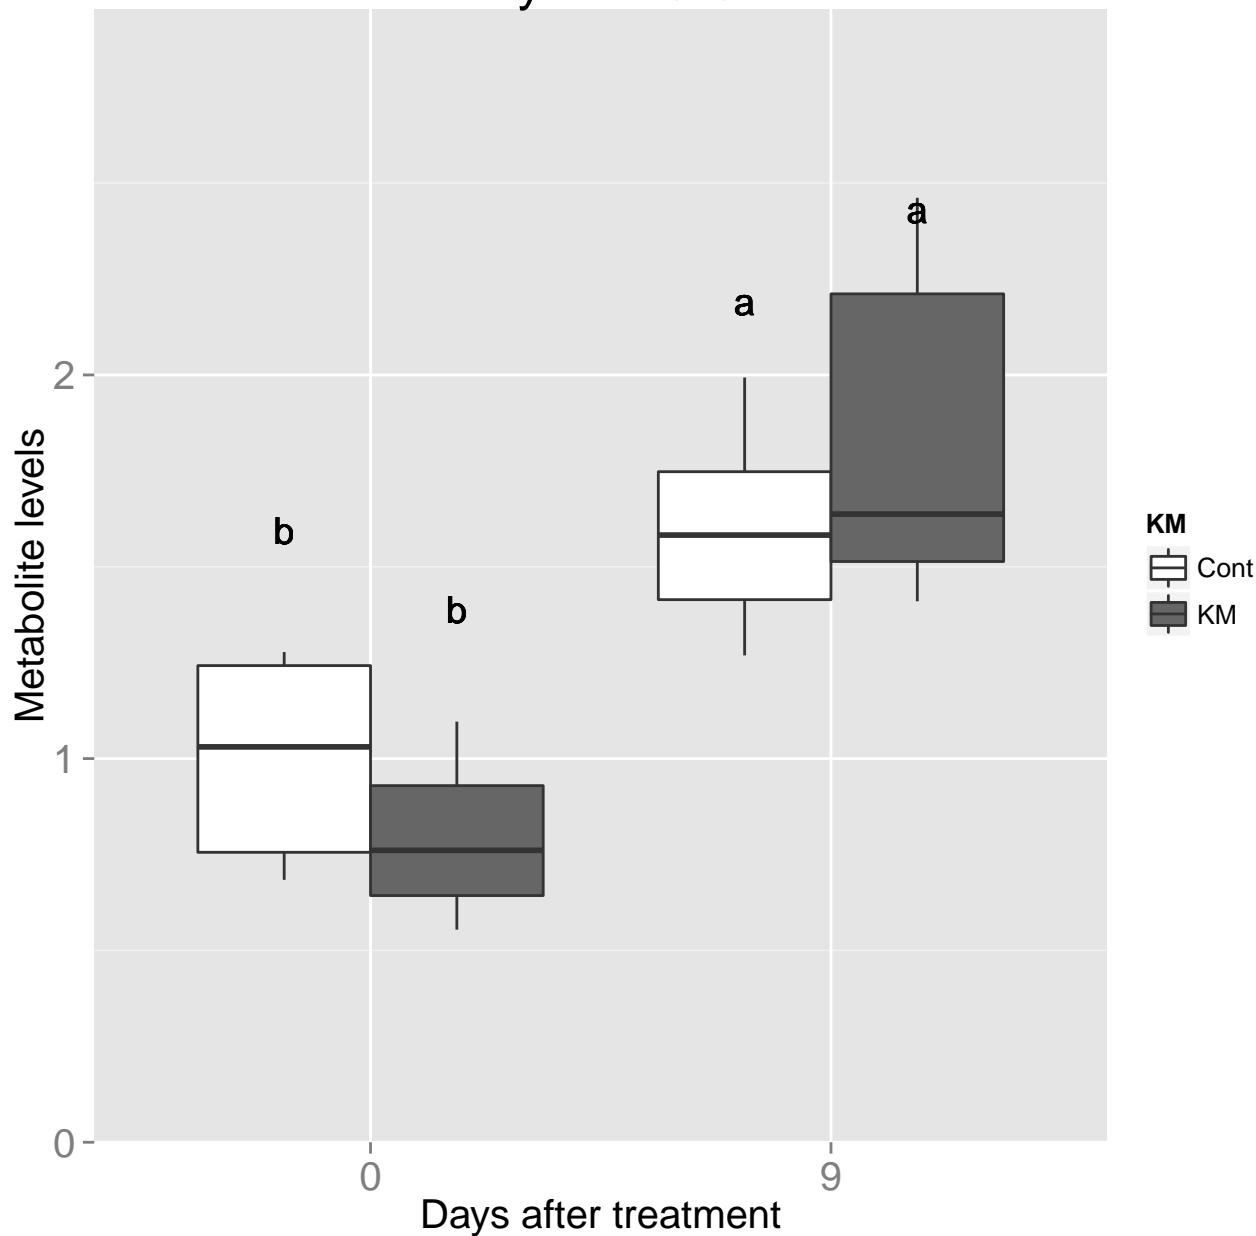



# GABA

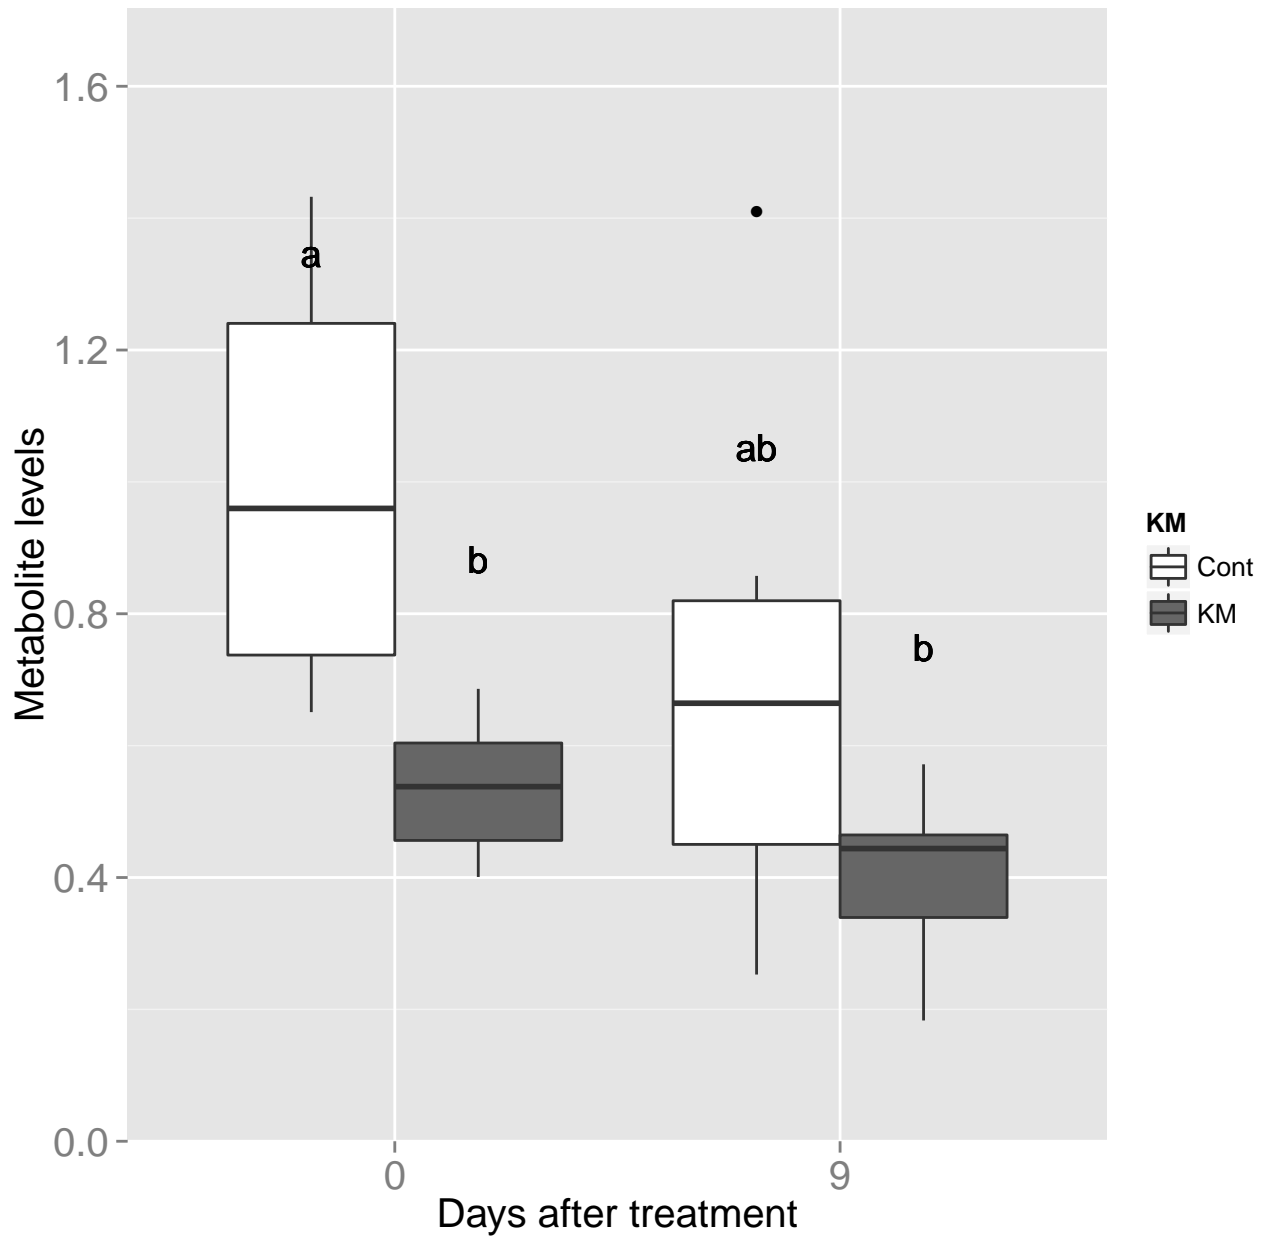

# Aspartate

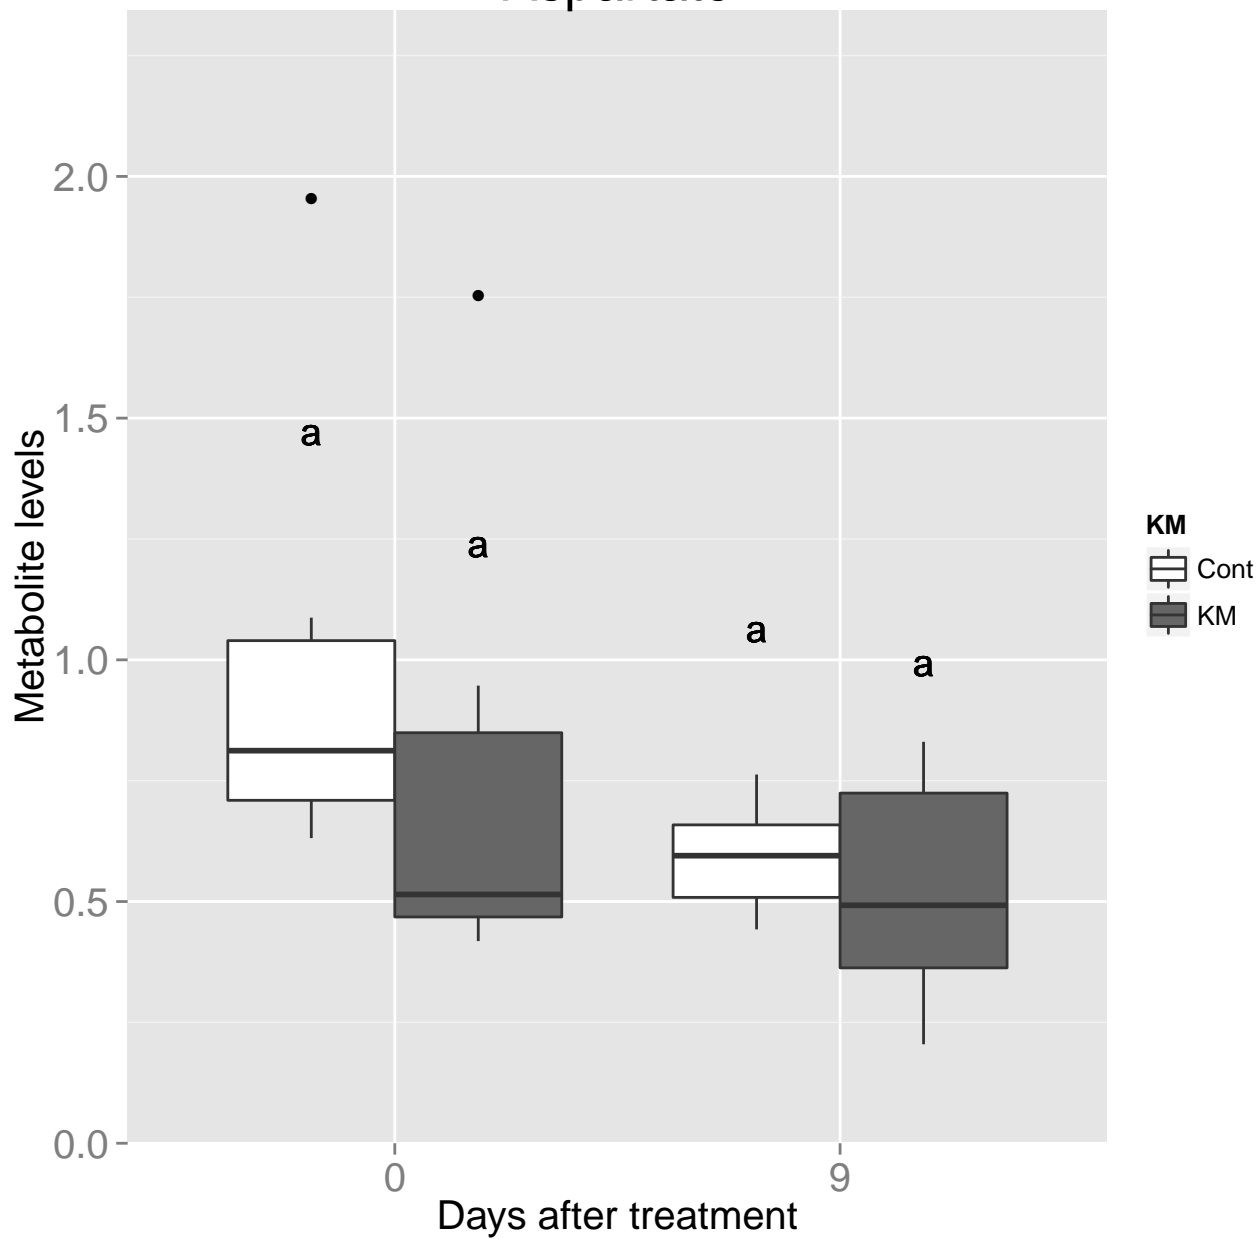

# Methionine

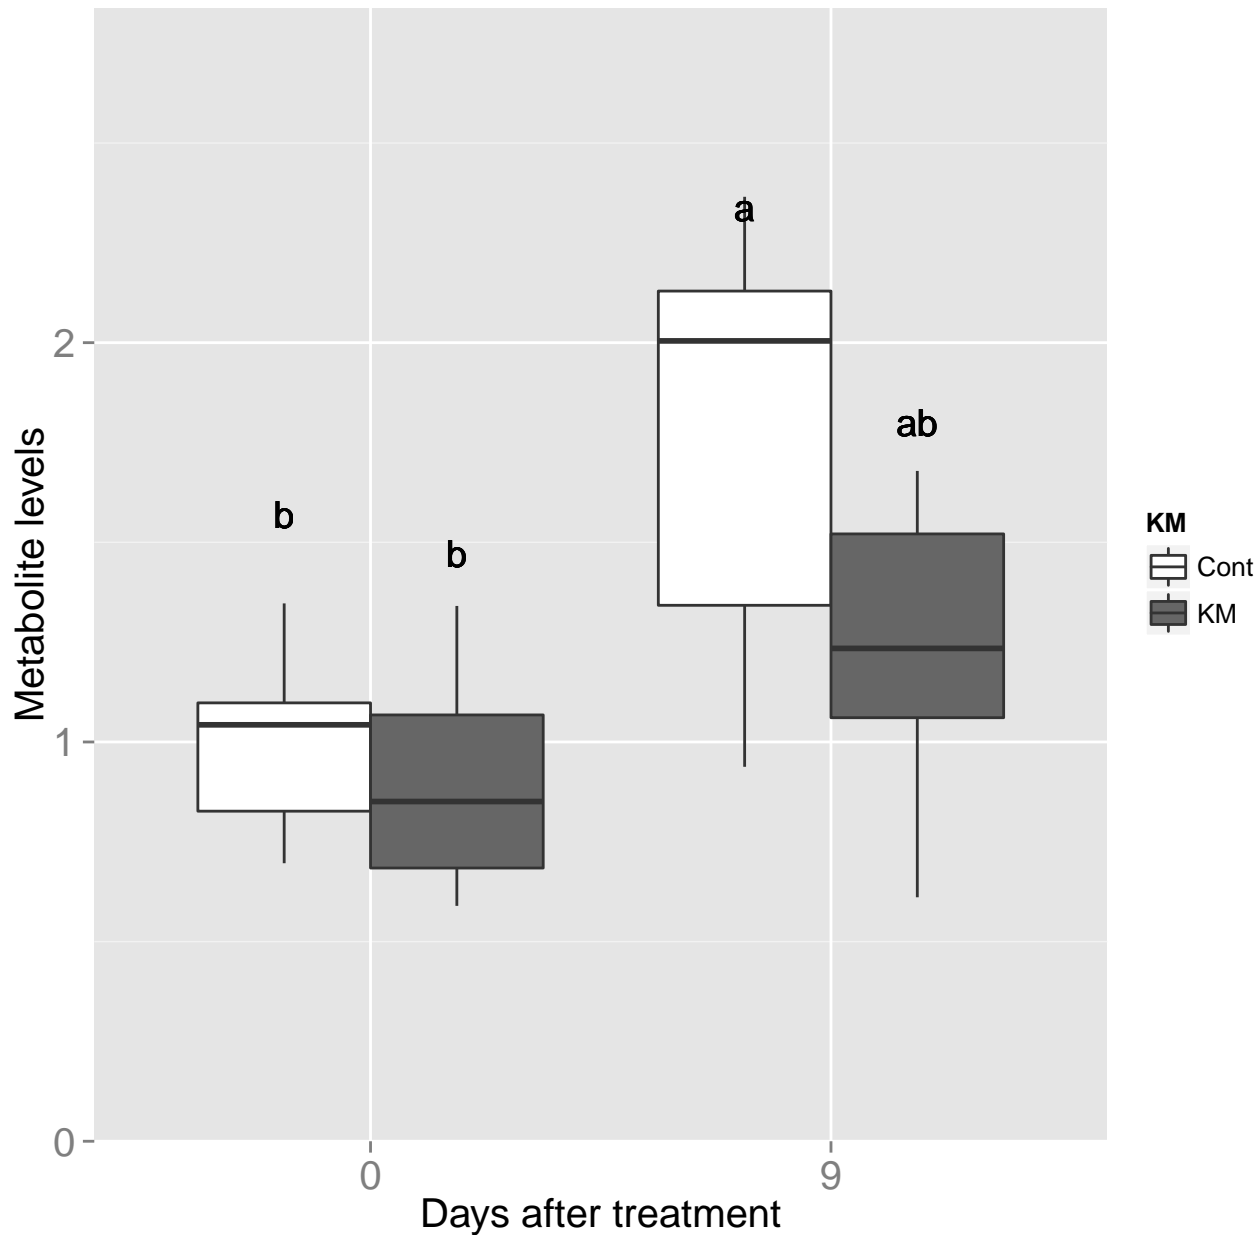

# Xylose

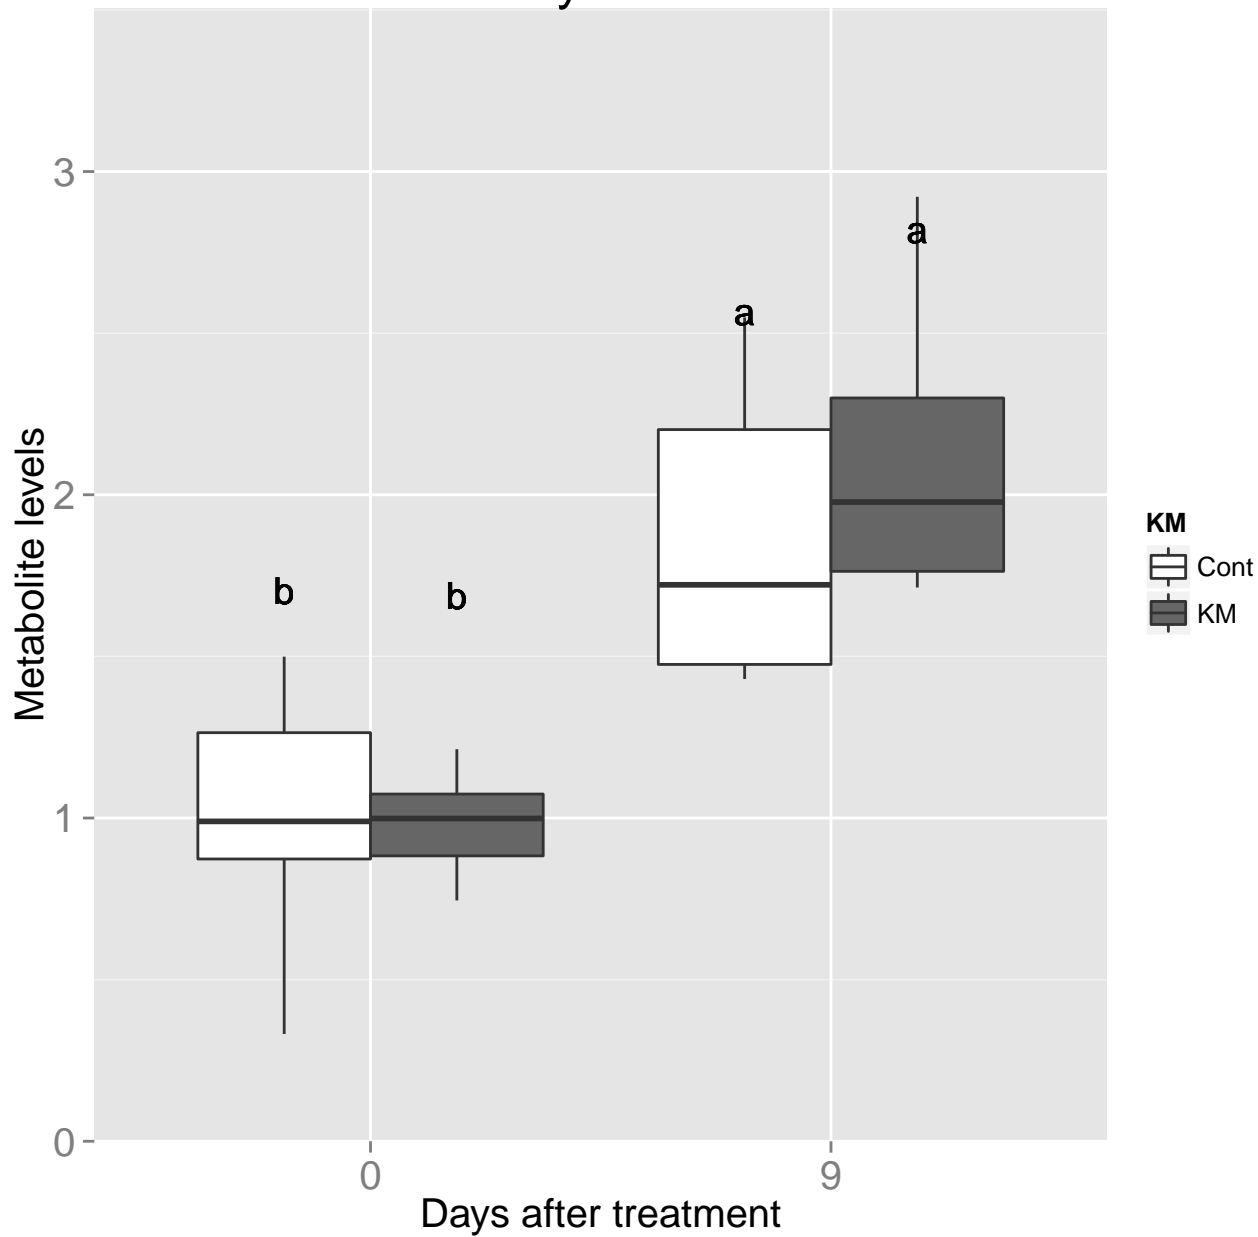

# Pyroglutamate

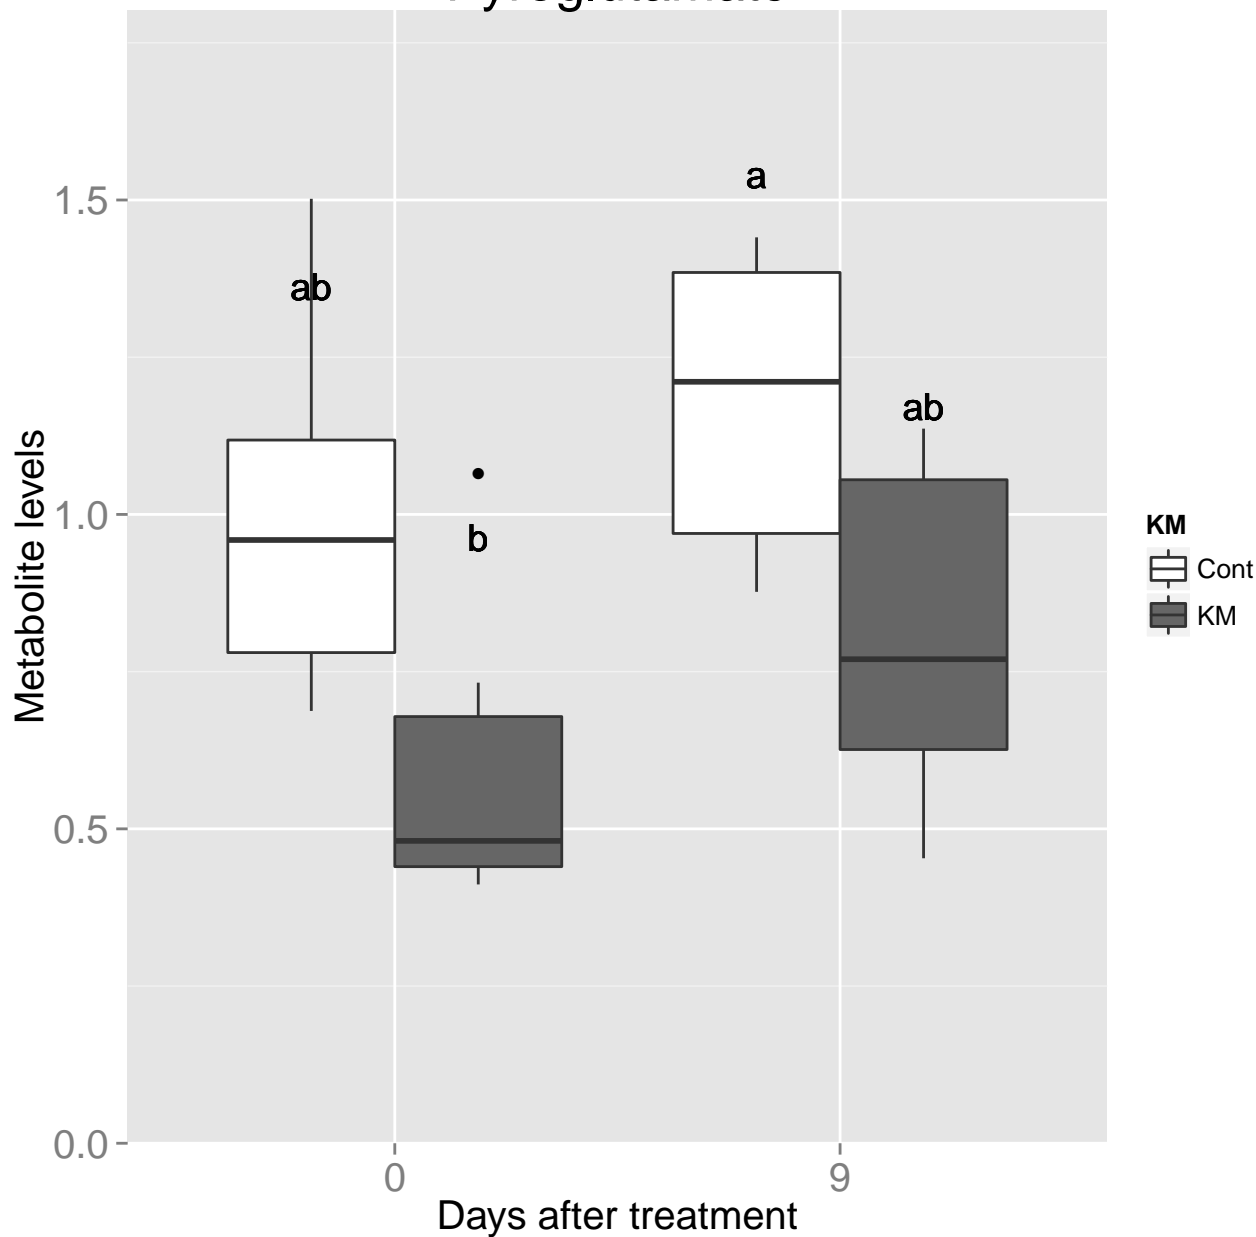

# Glutamate

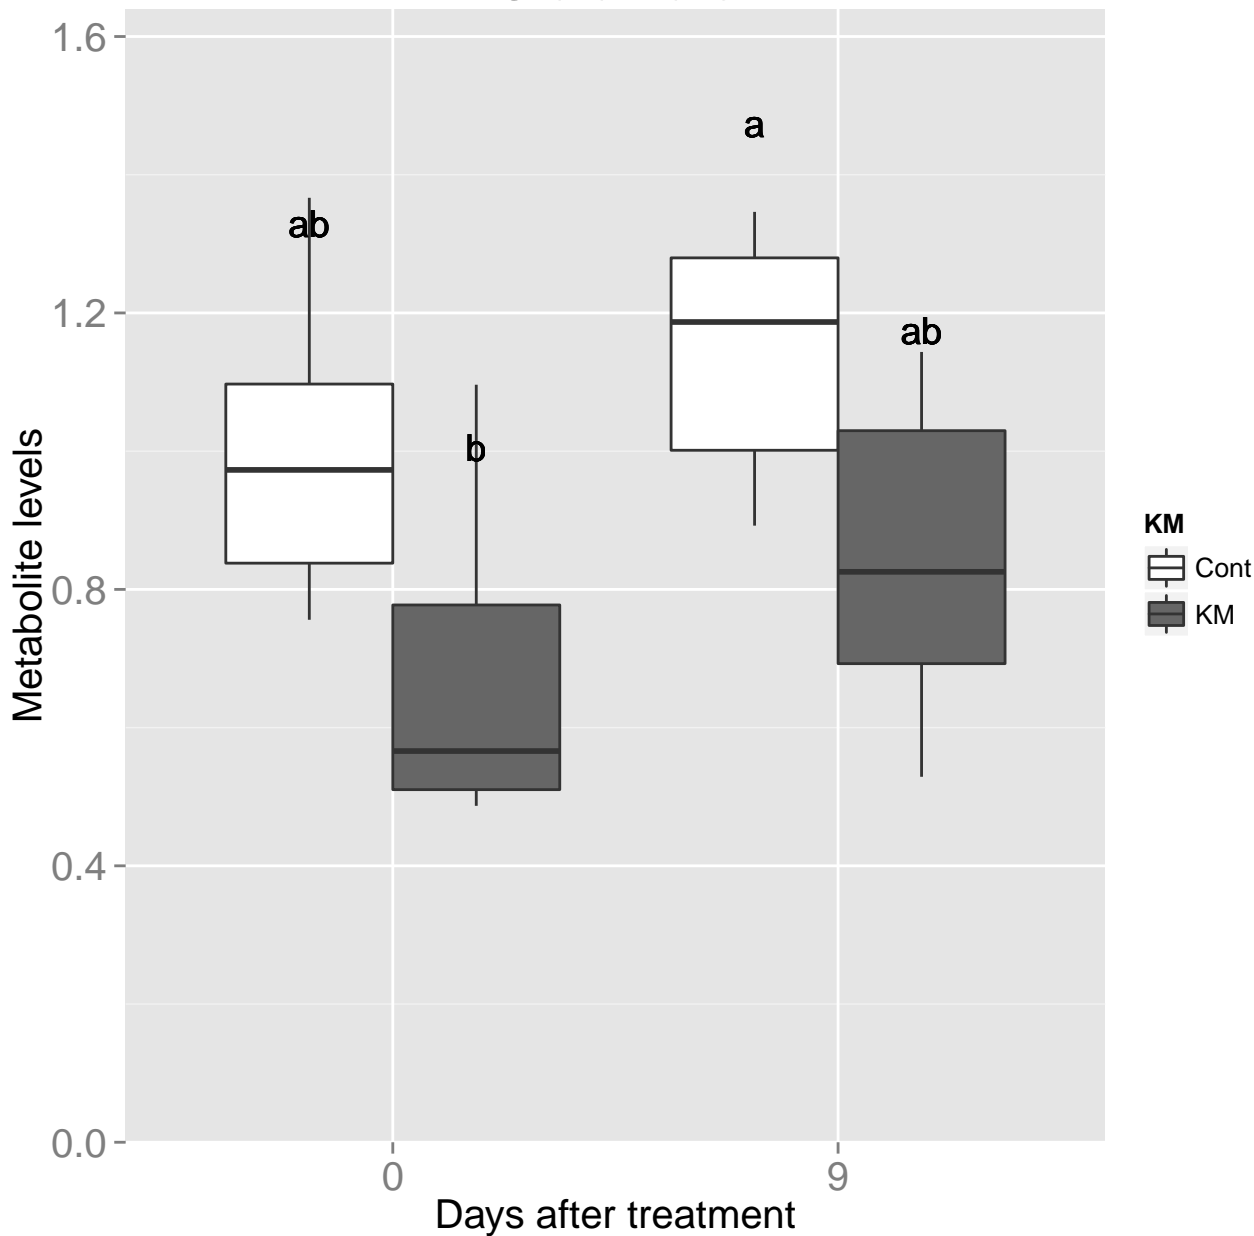

# Rhamnose

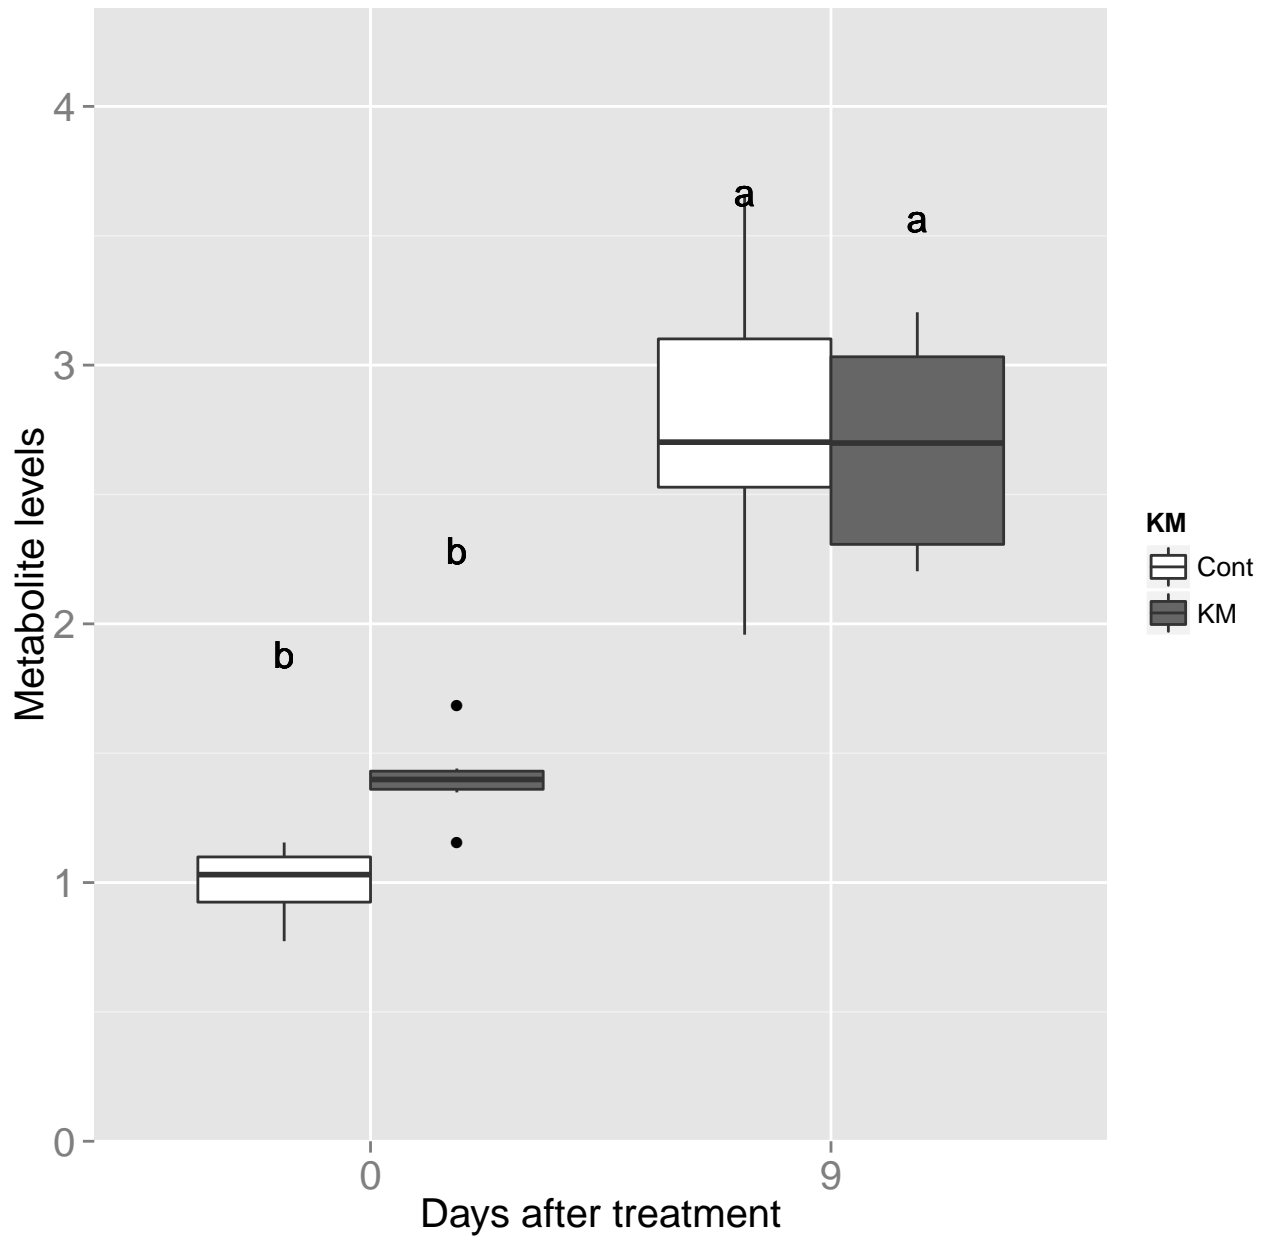

# Putrescine

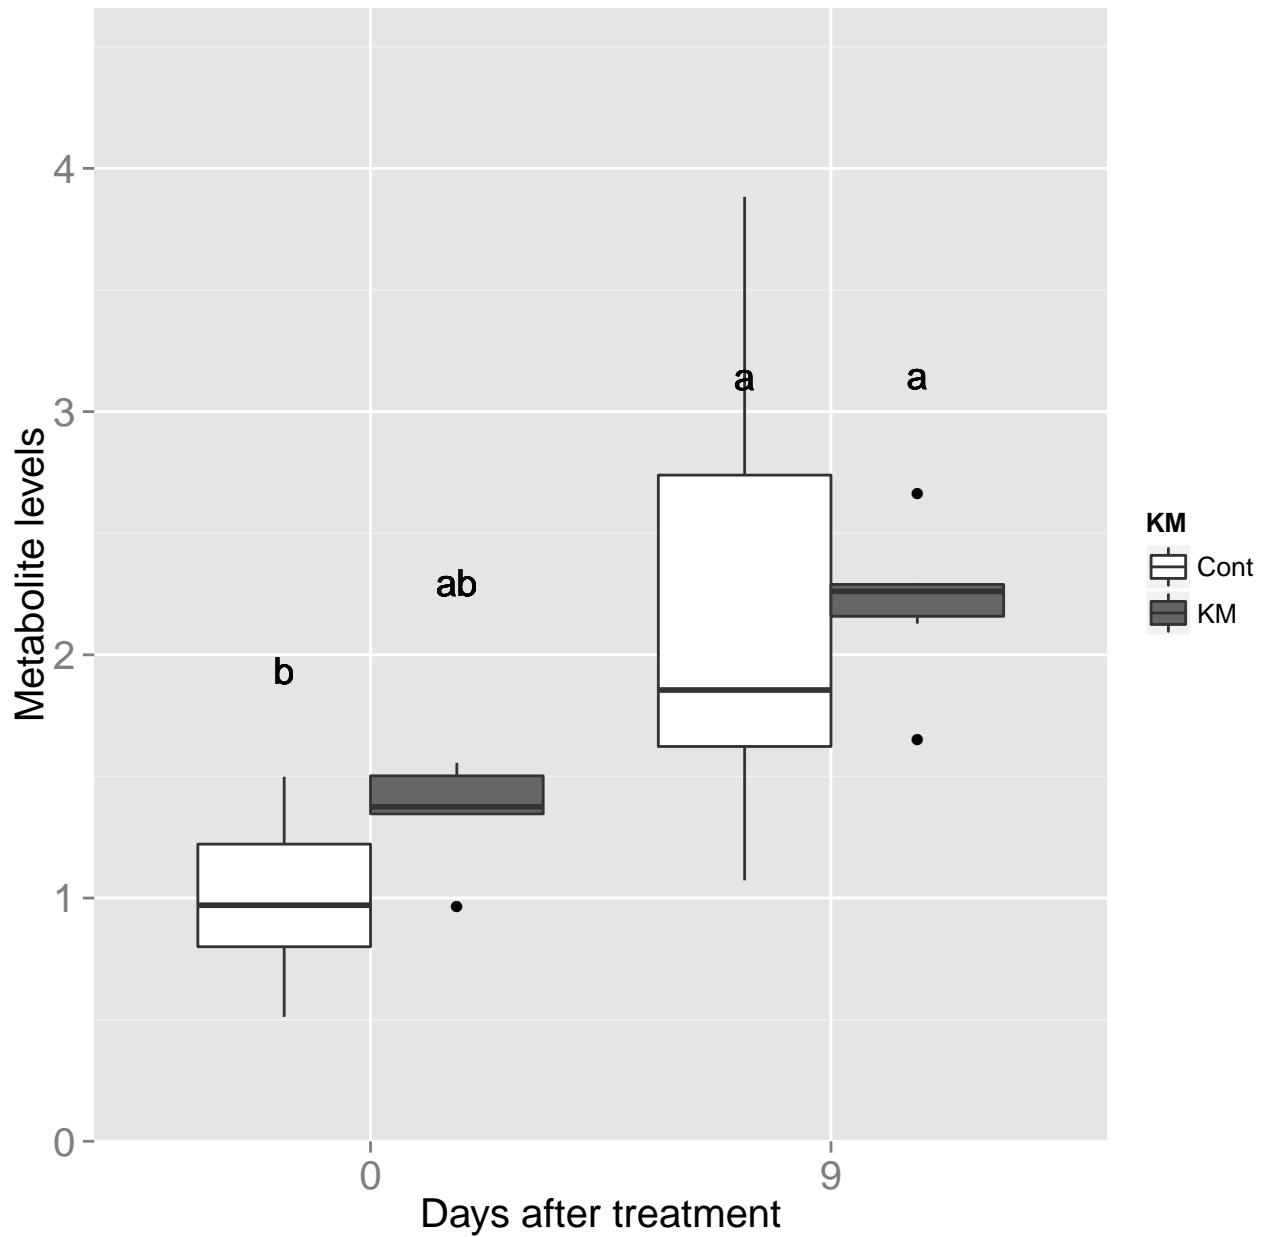



# Fucose

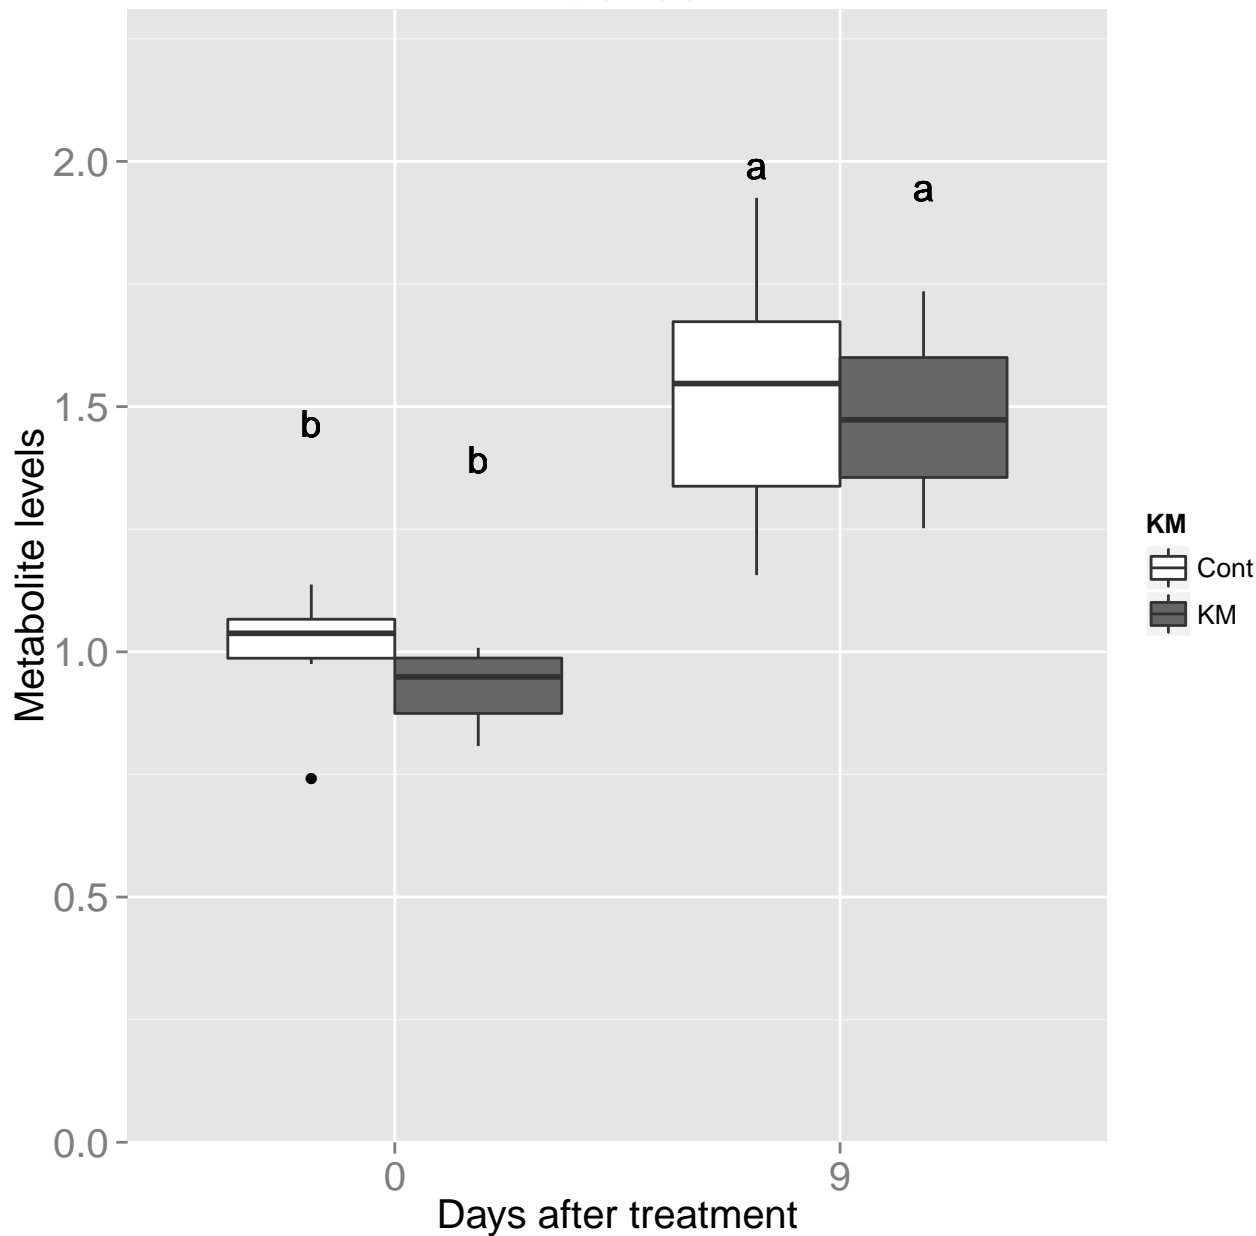

# X2OG

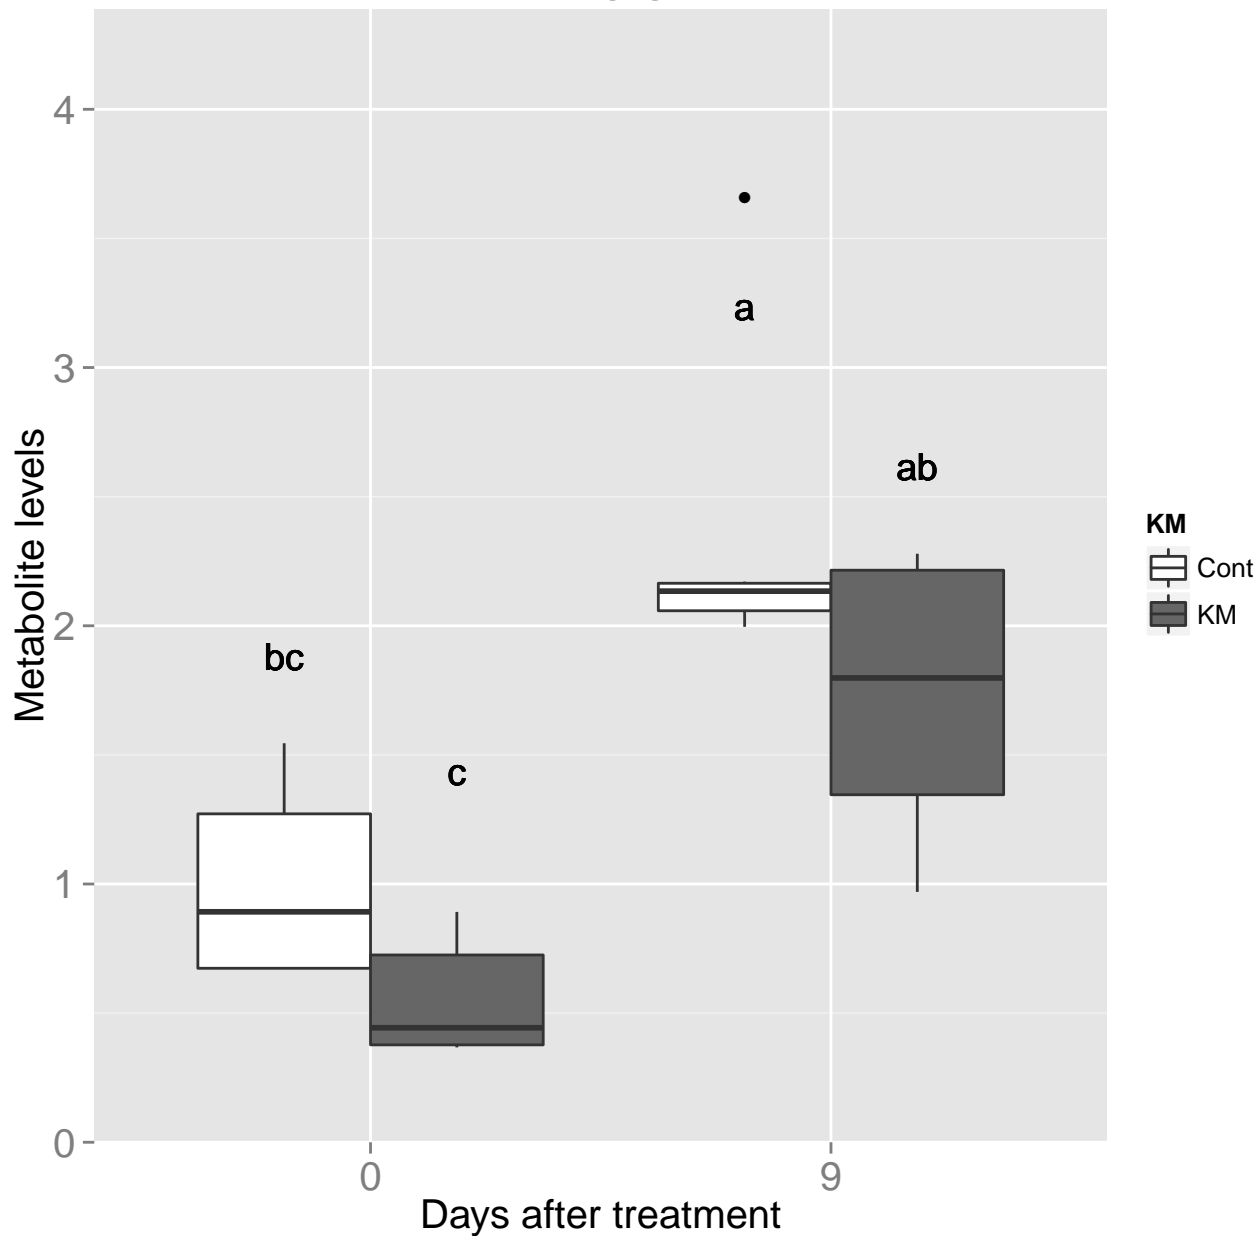

# Phenylalanine

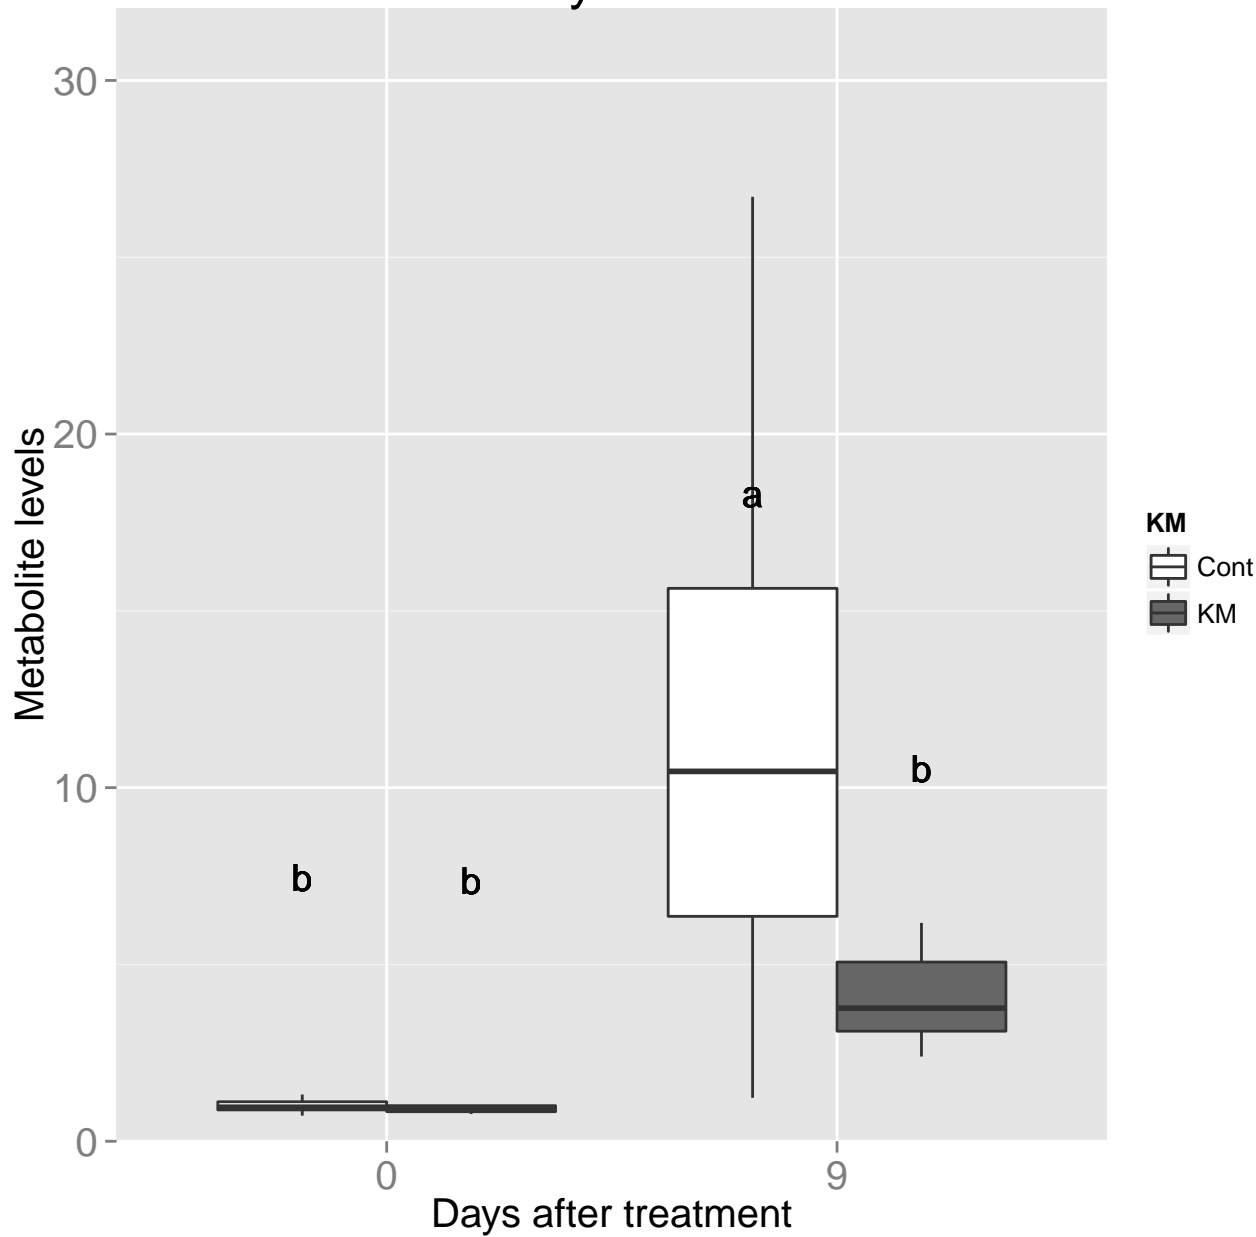

# Asparagine

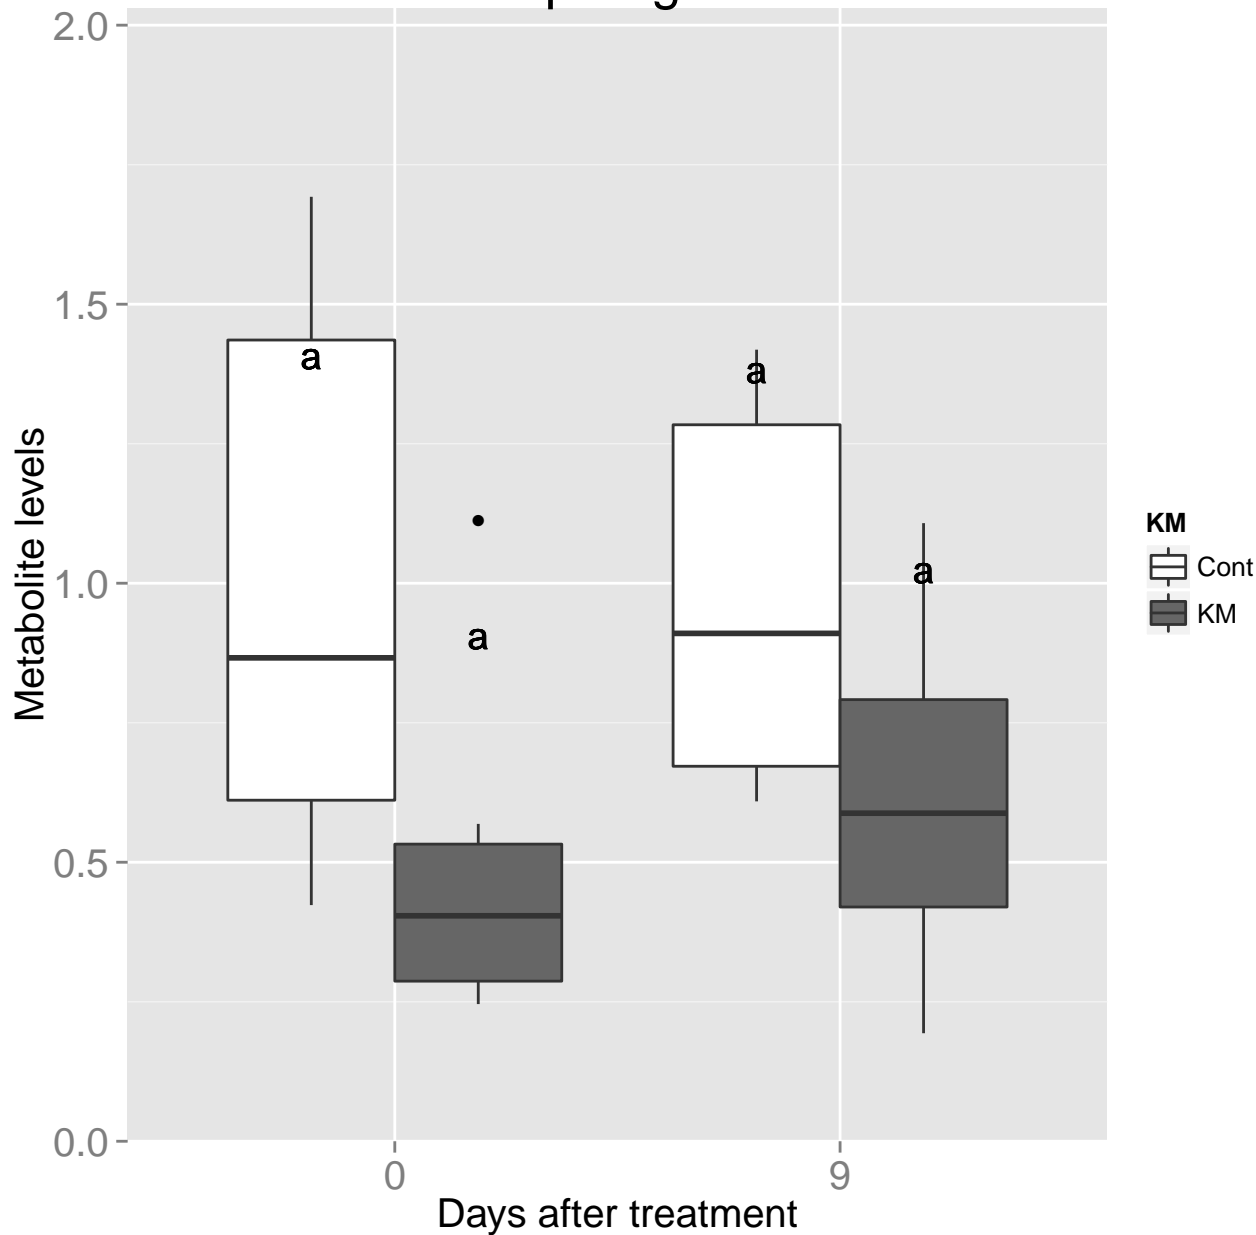

# Glyceraldehyde.3.phosphate

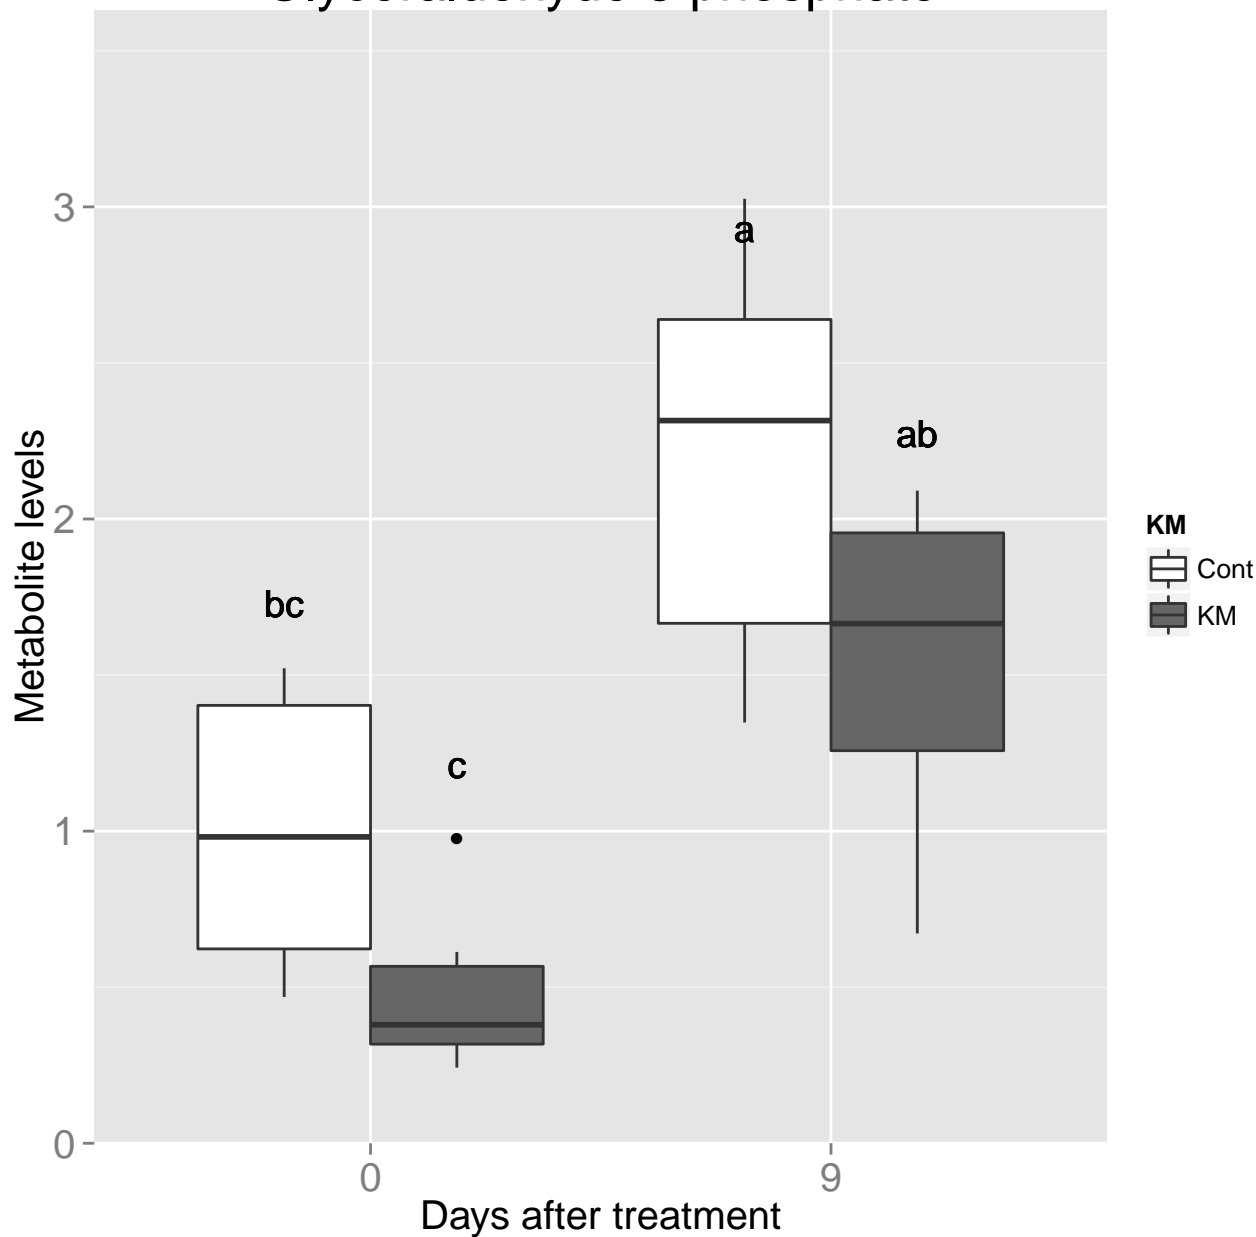

# Fructose

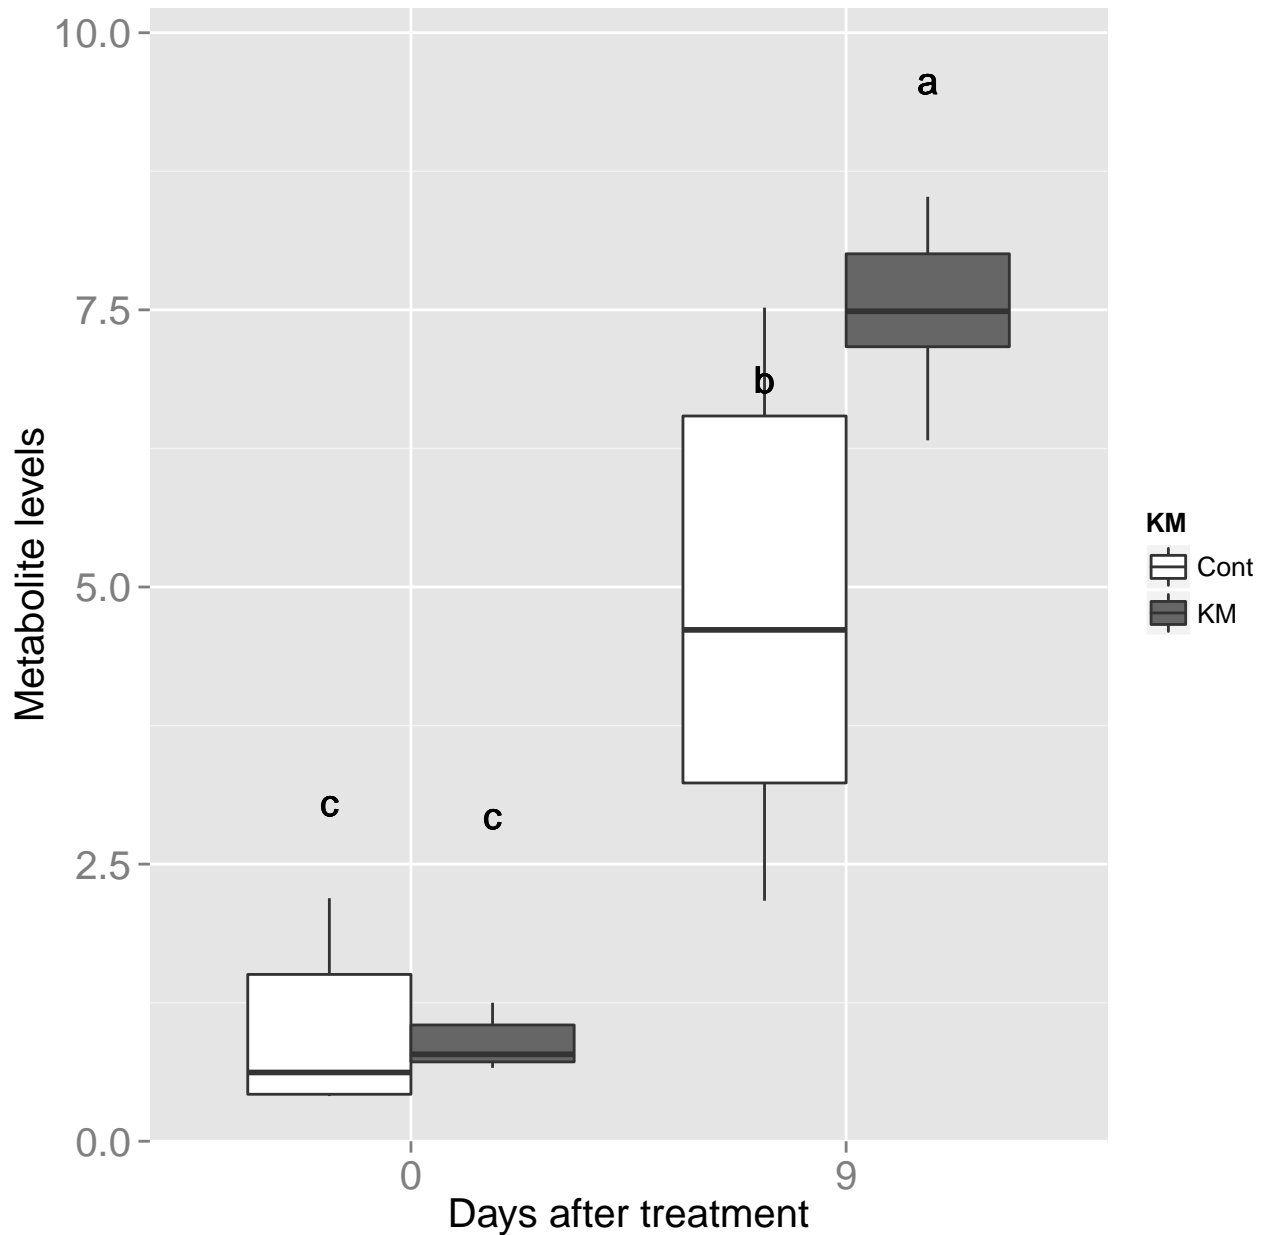

# Sorbitol

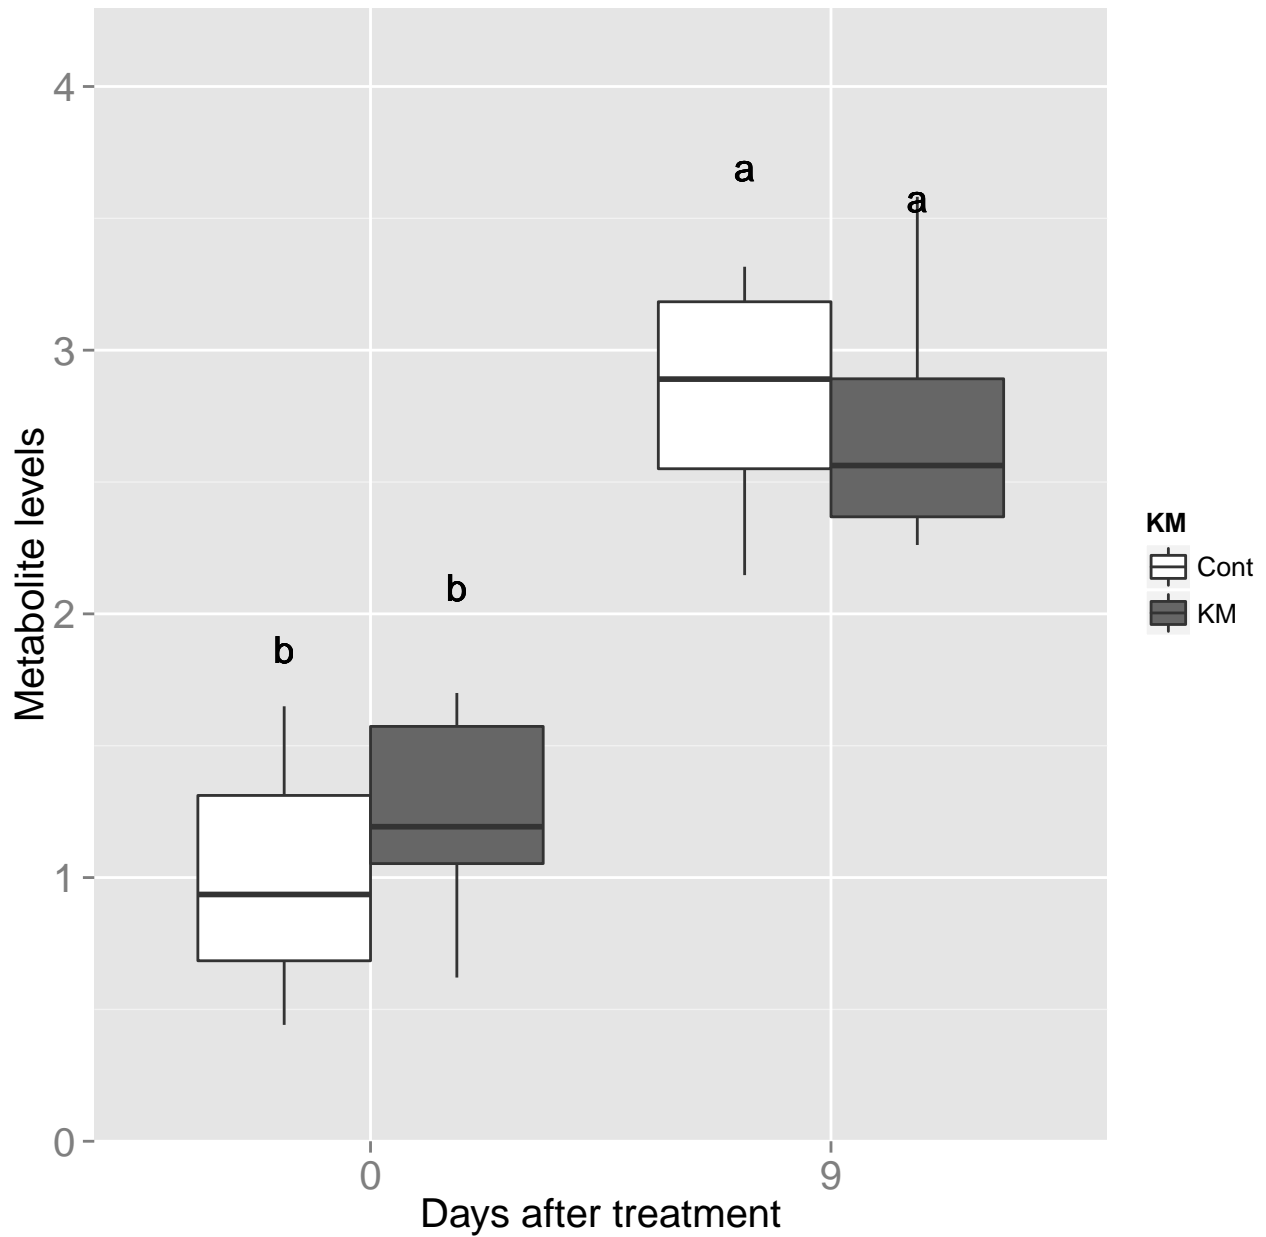

# Glucose

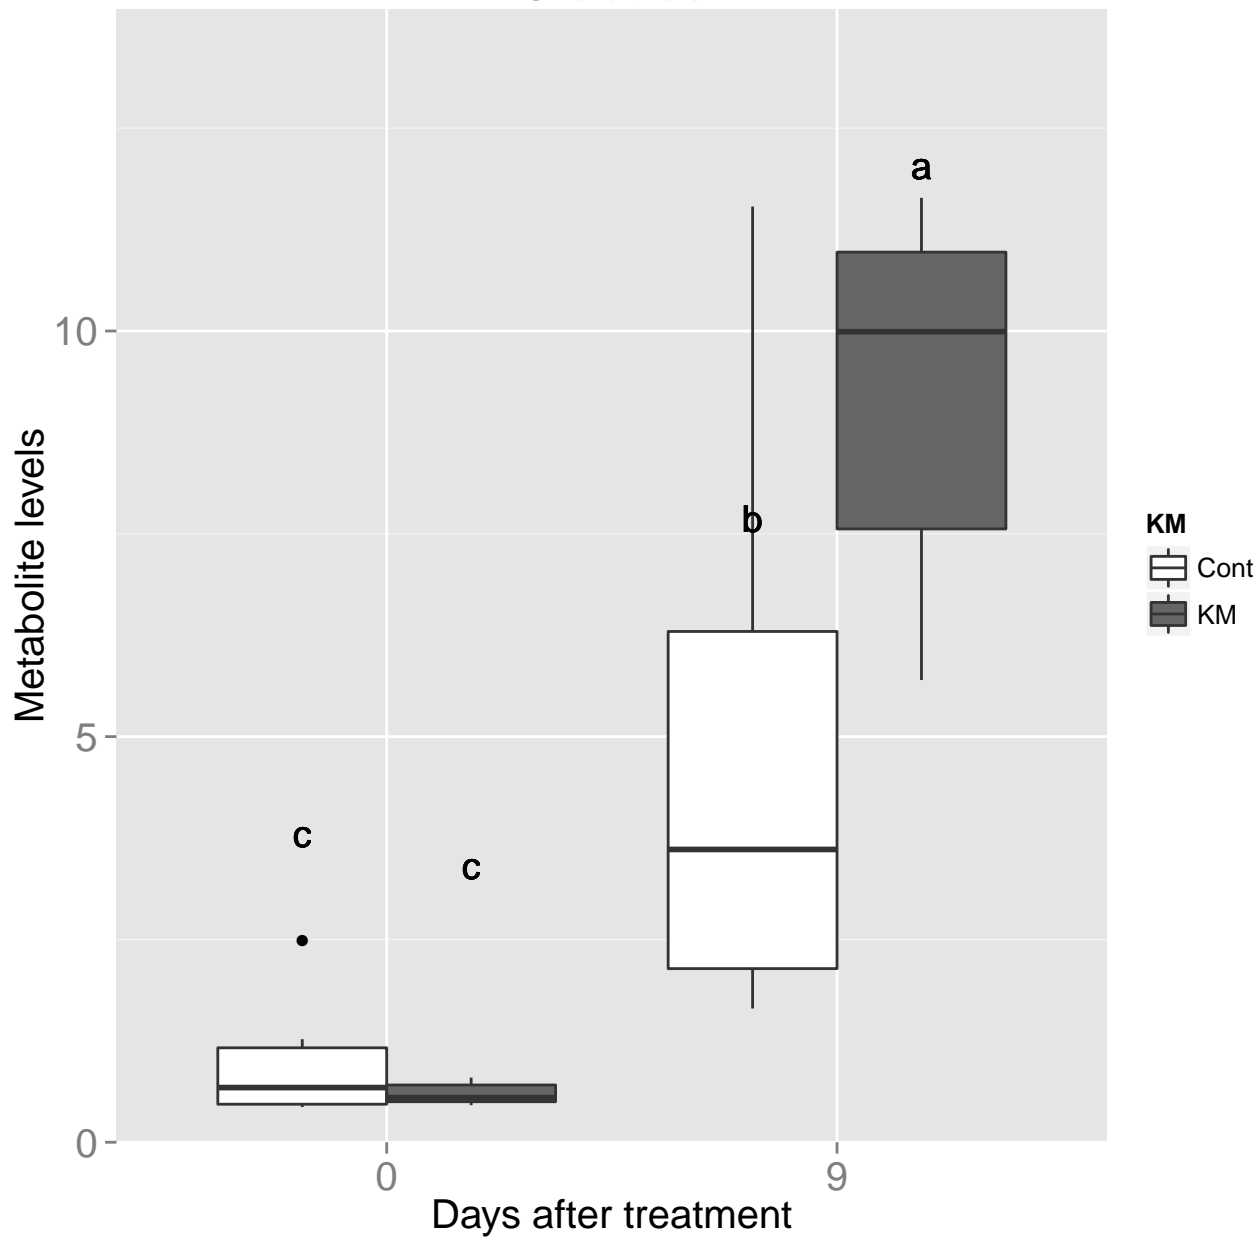



# Citrate

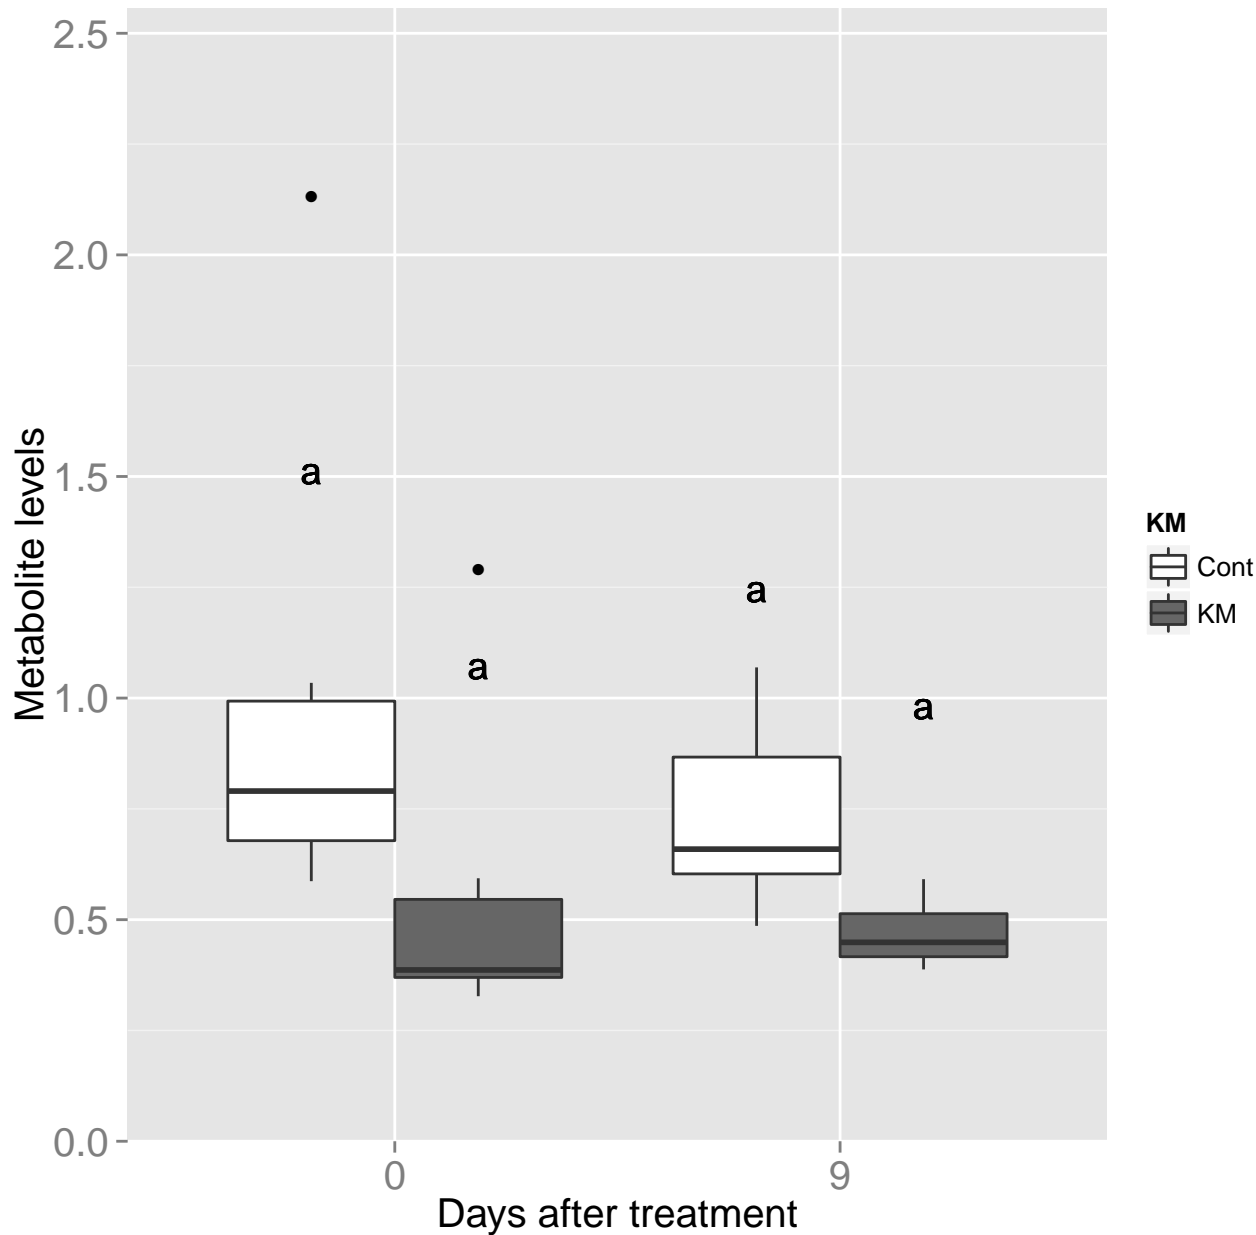

# Glutamine

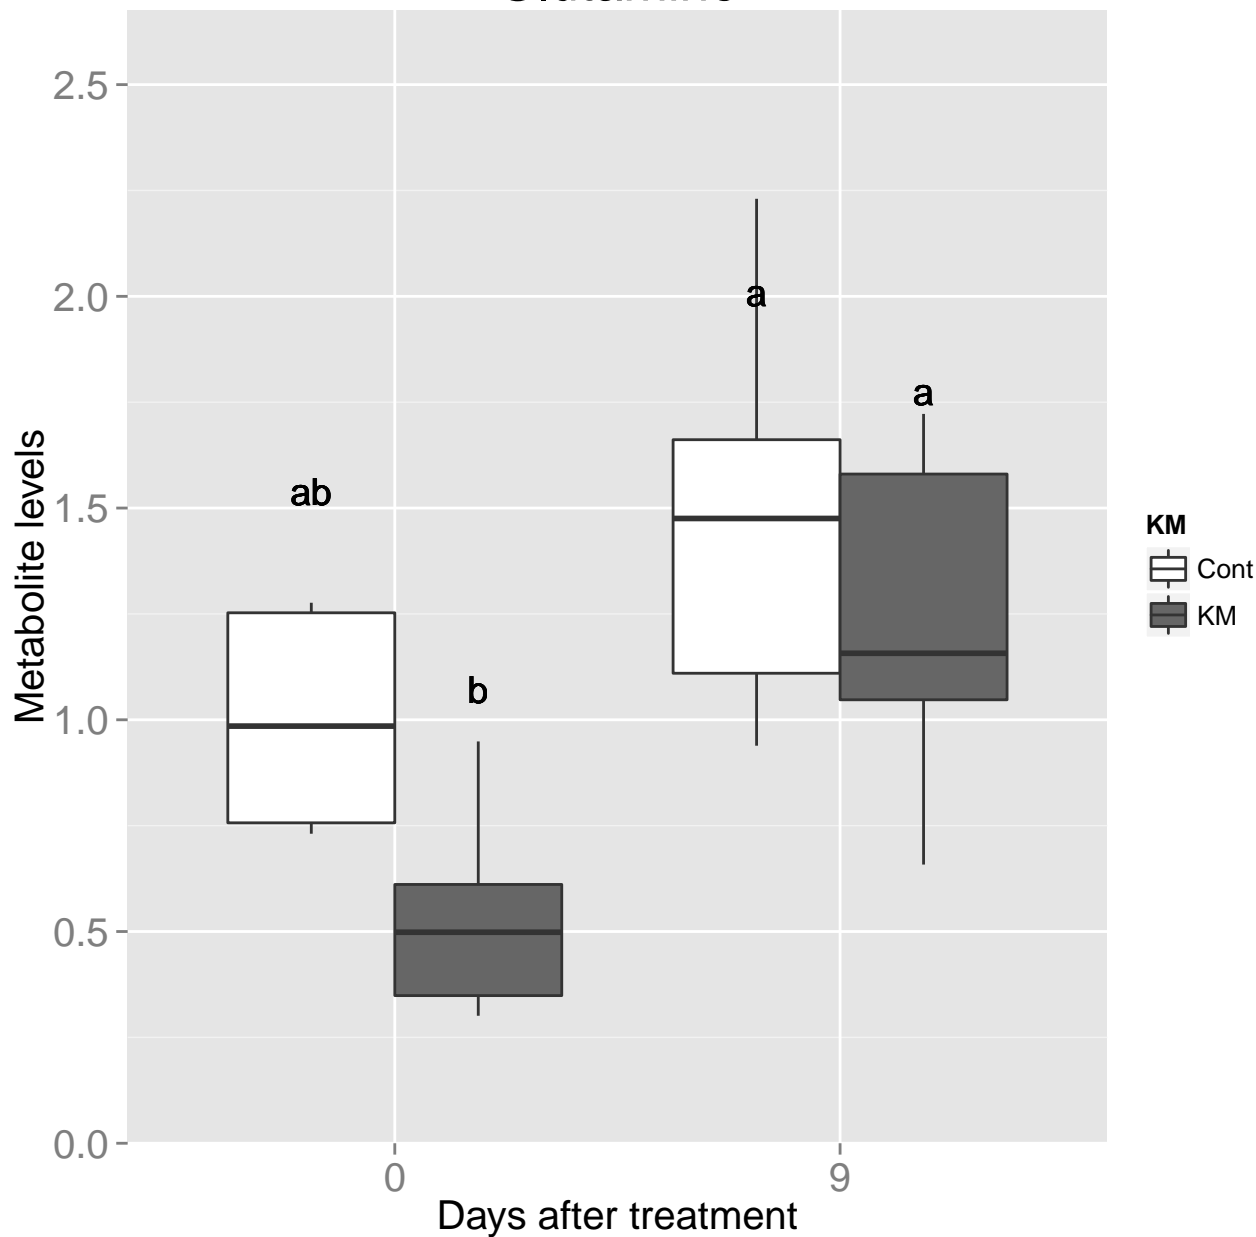

# X2.oxogulonate

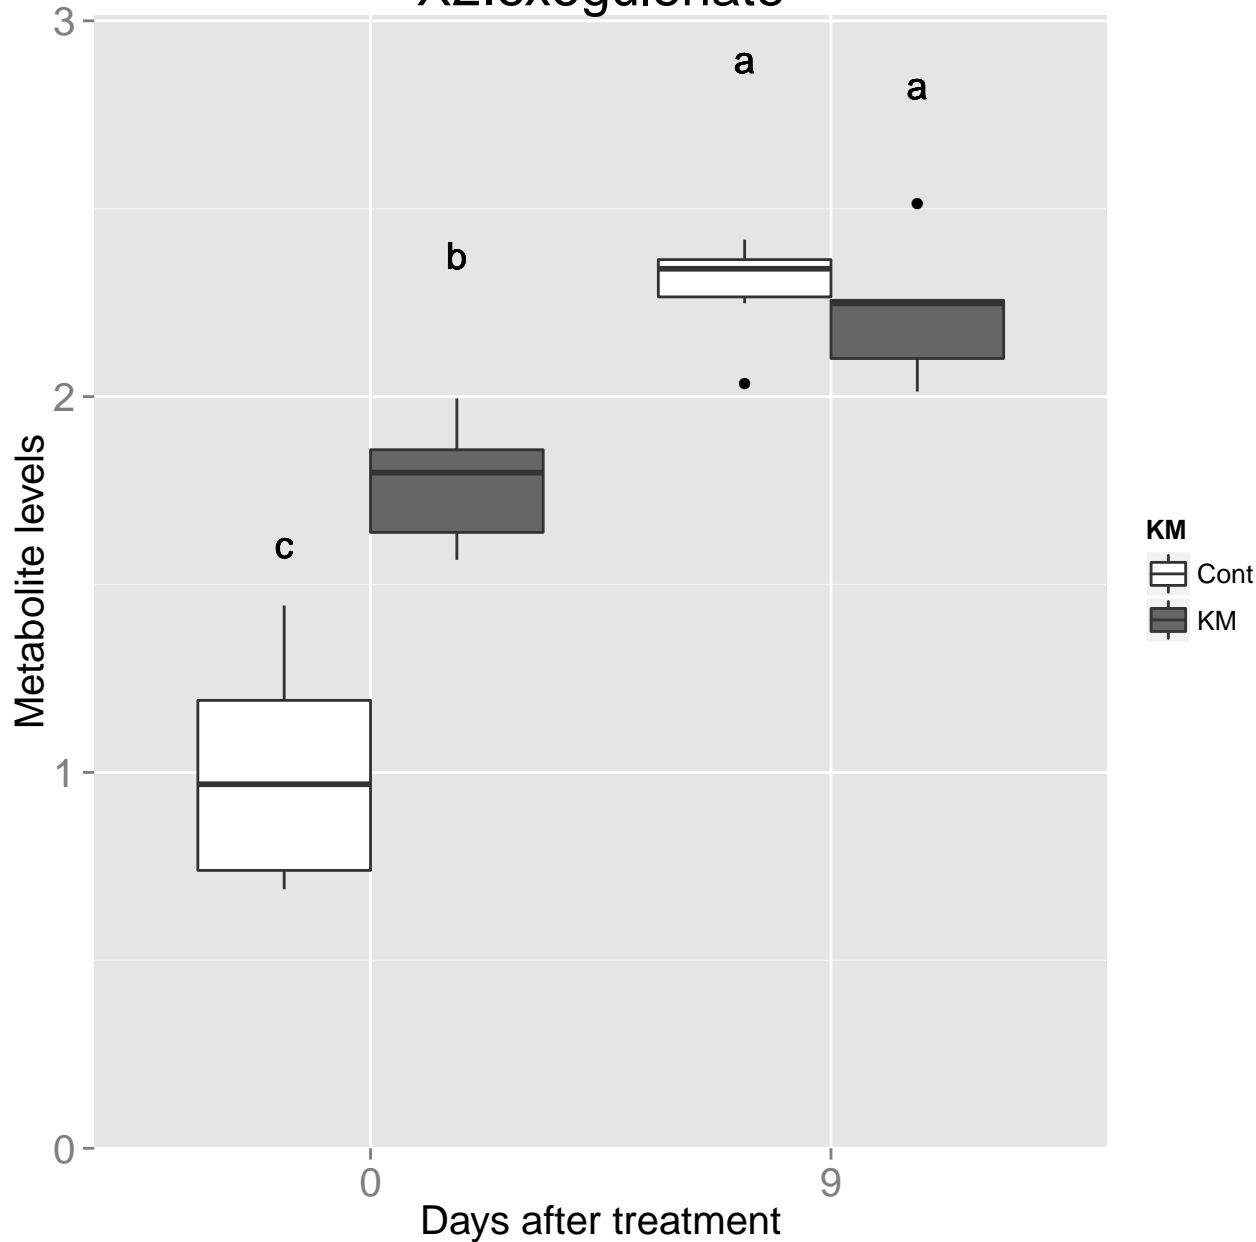

# Glucopyranoside

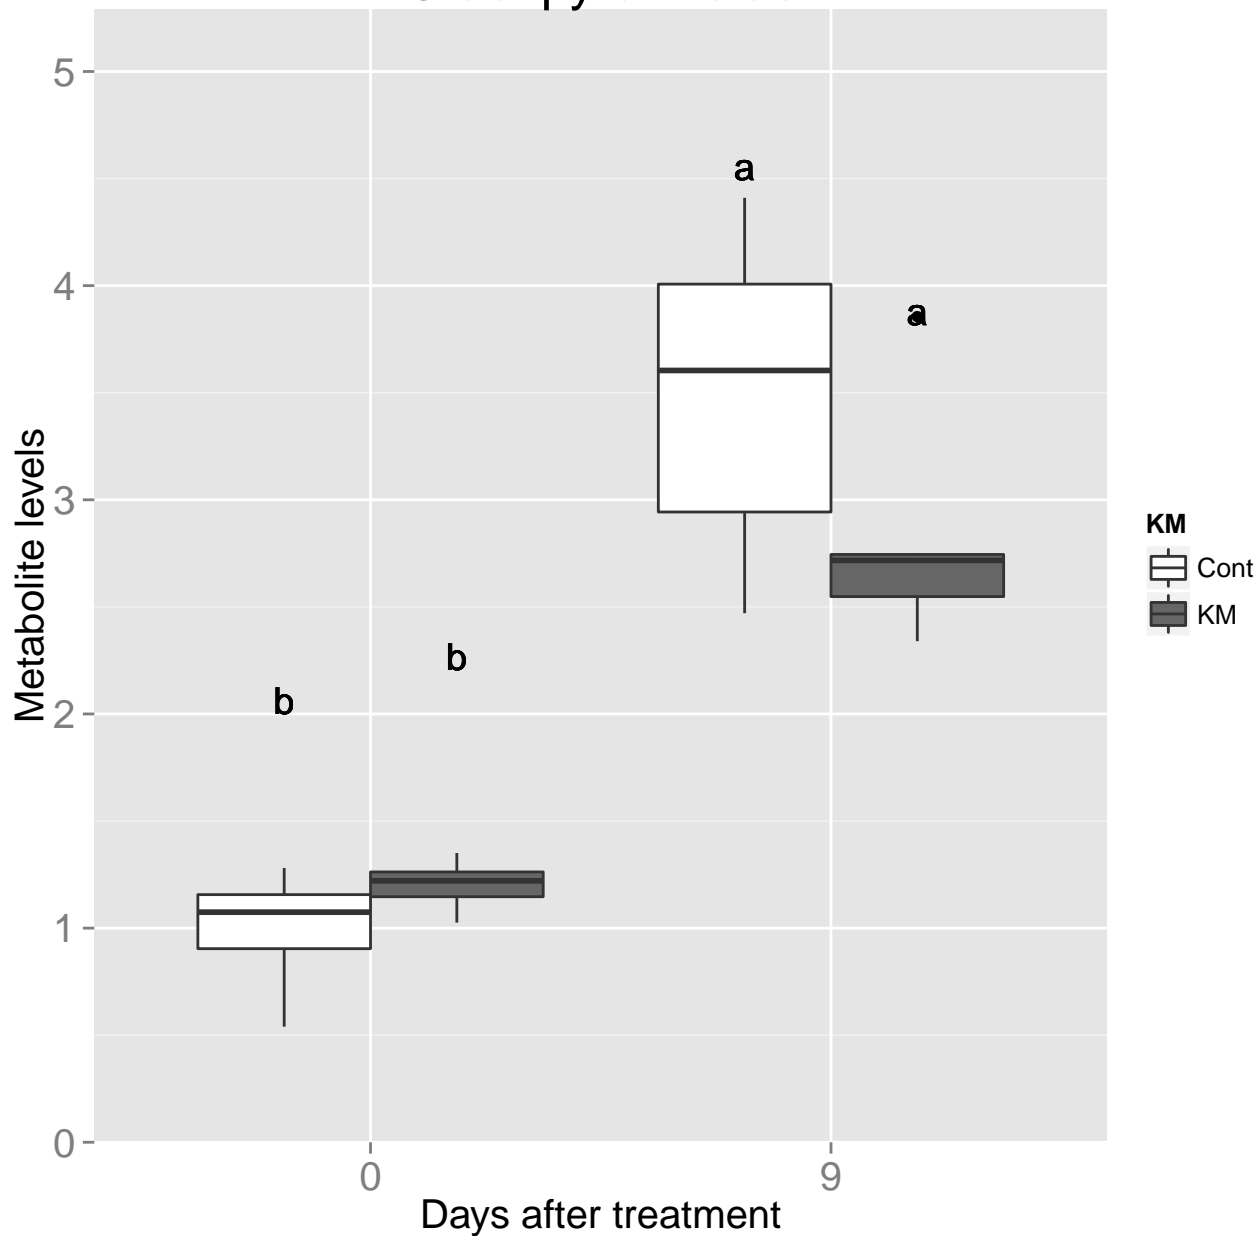

# Galactonolactone

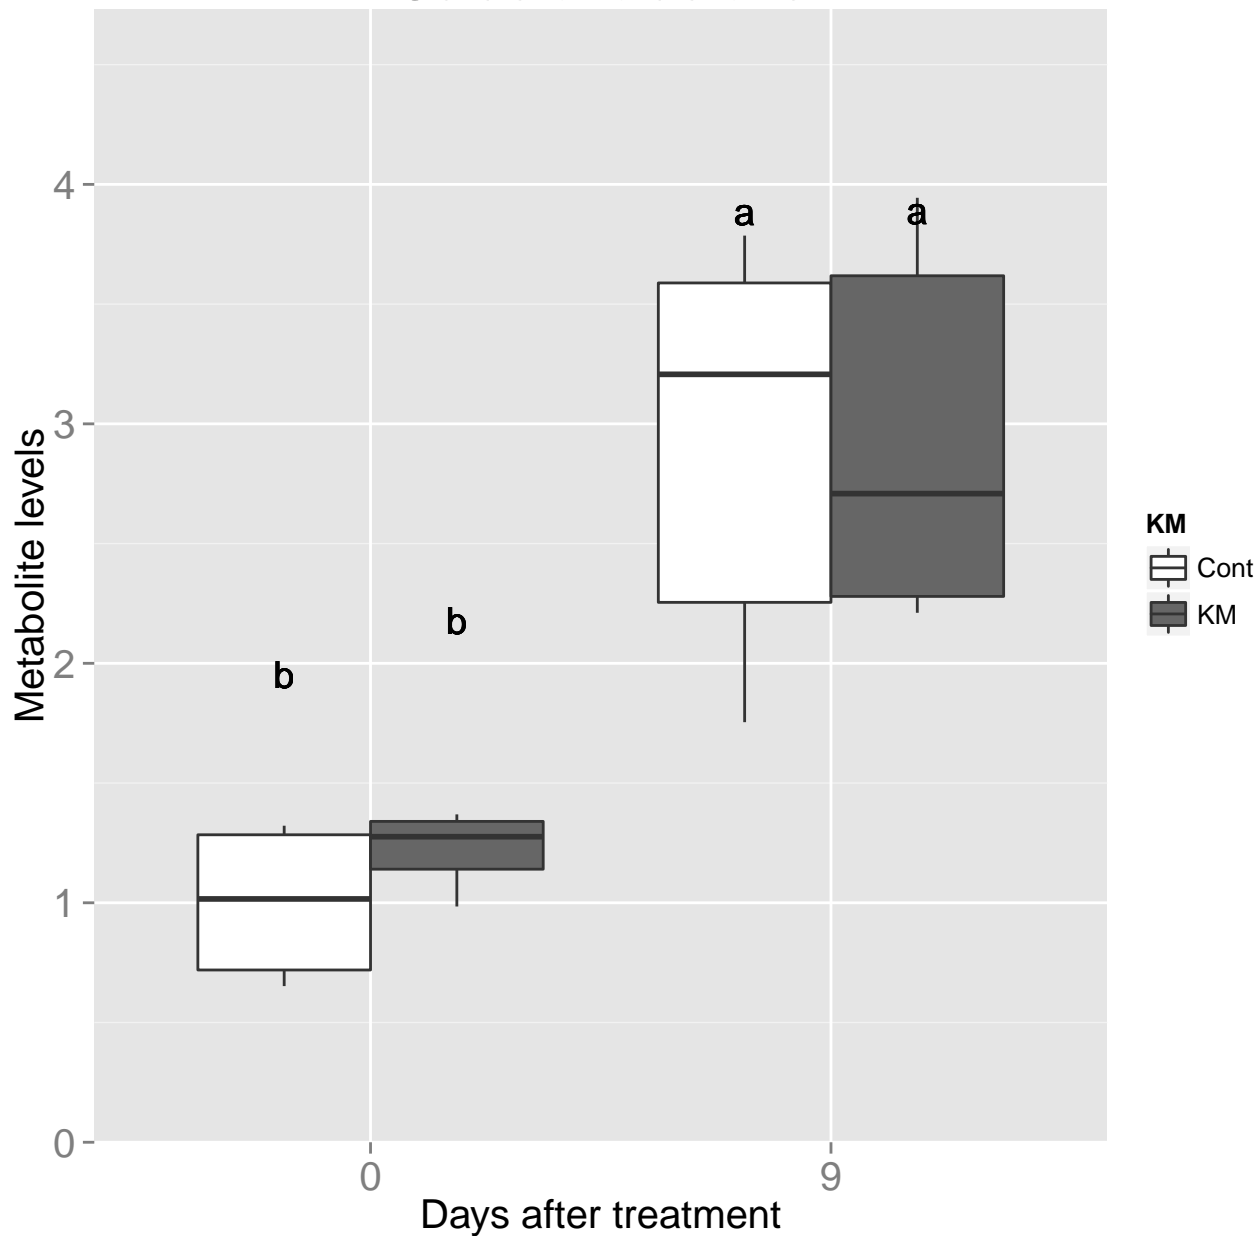

# Dehydroascorbate

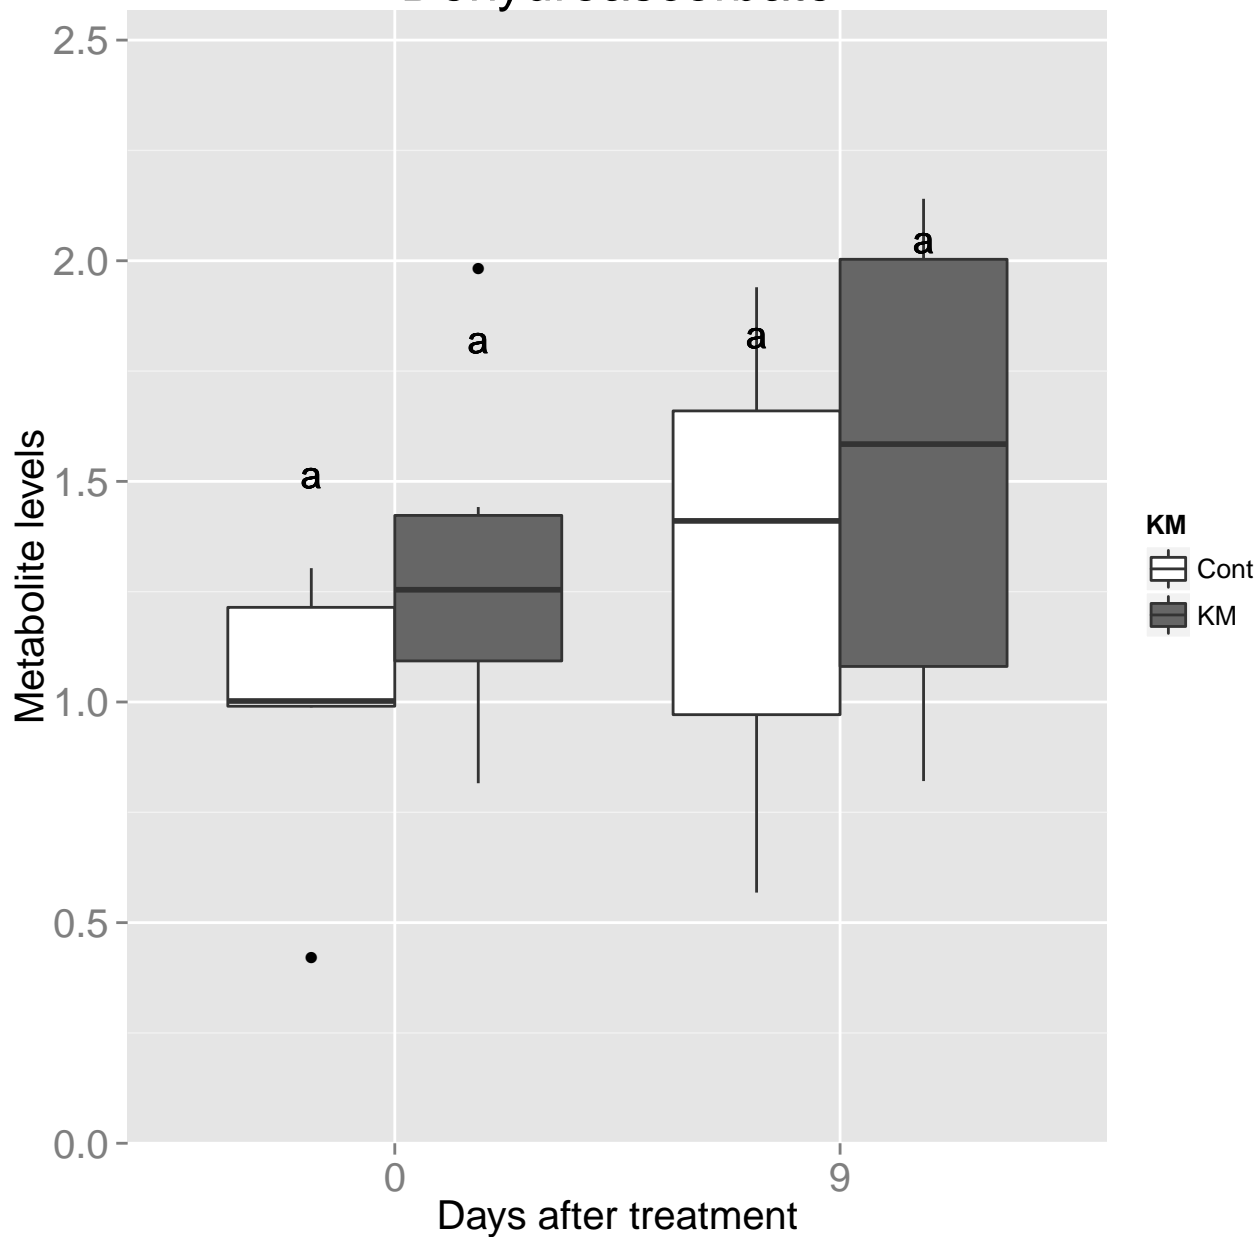

# Galactonate

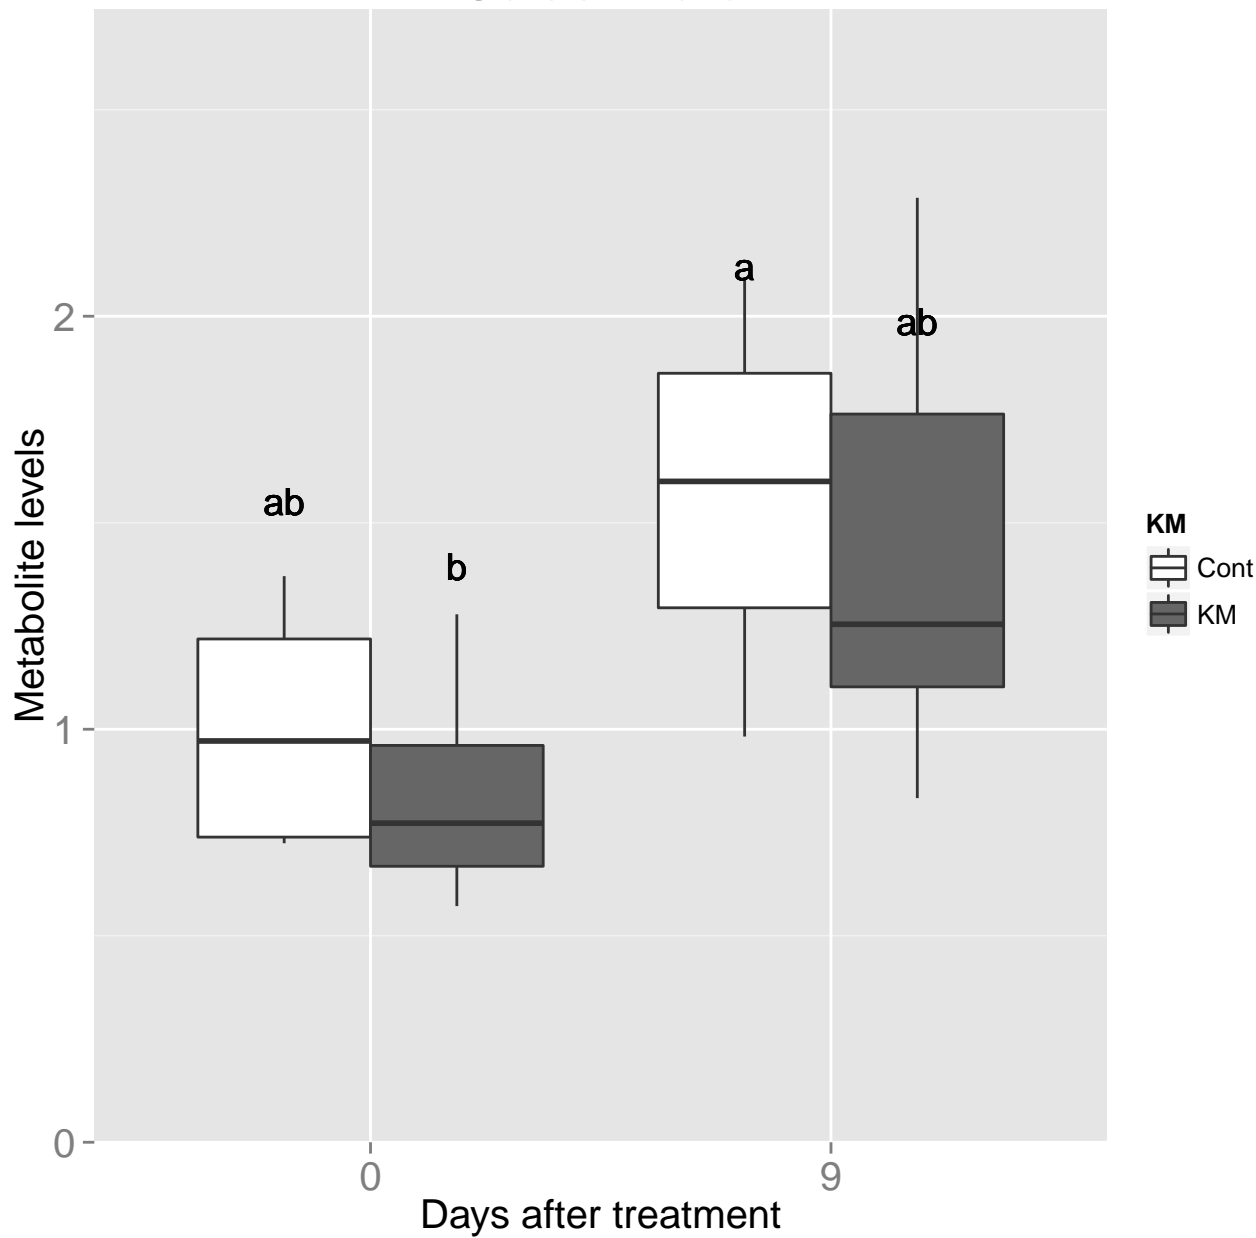

# Tyramine

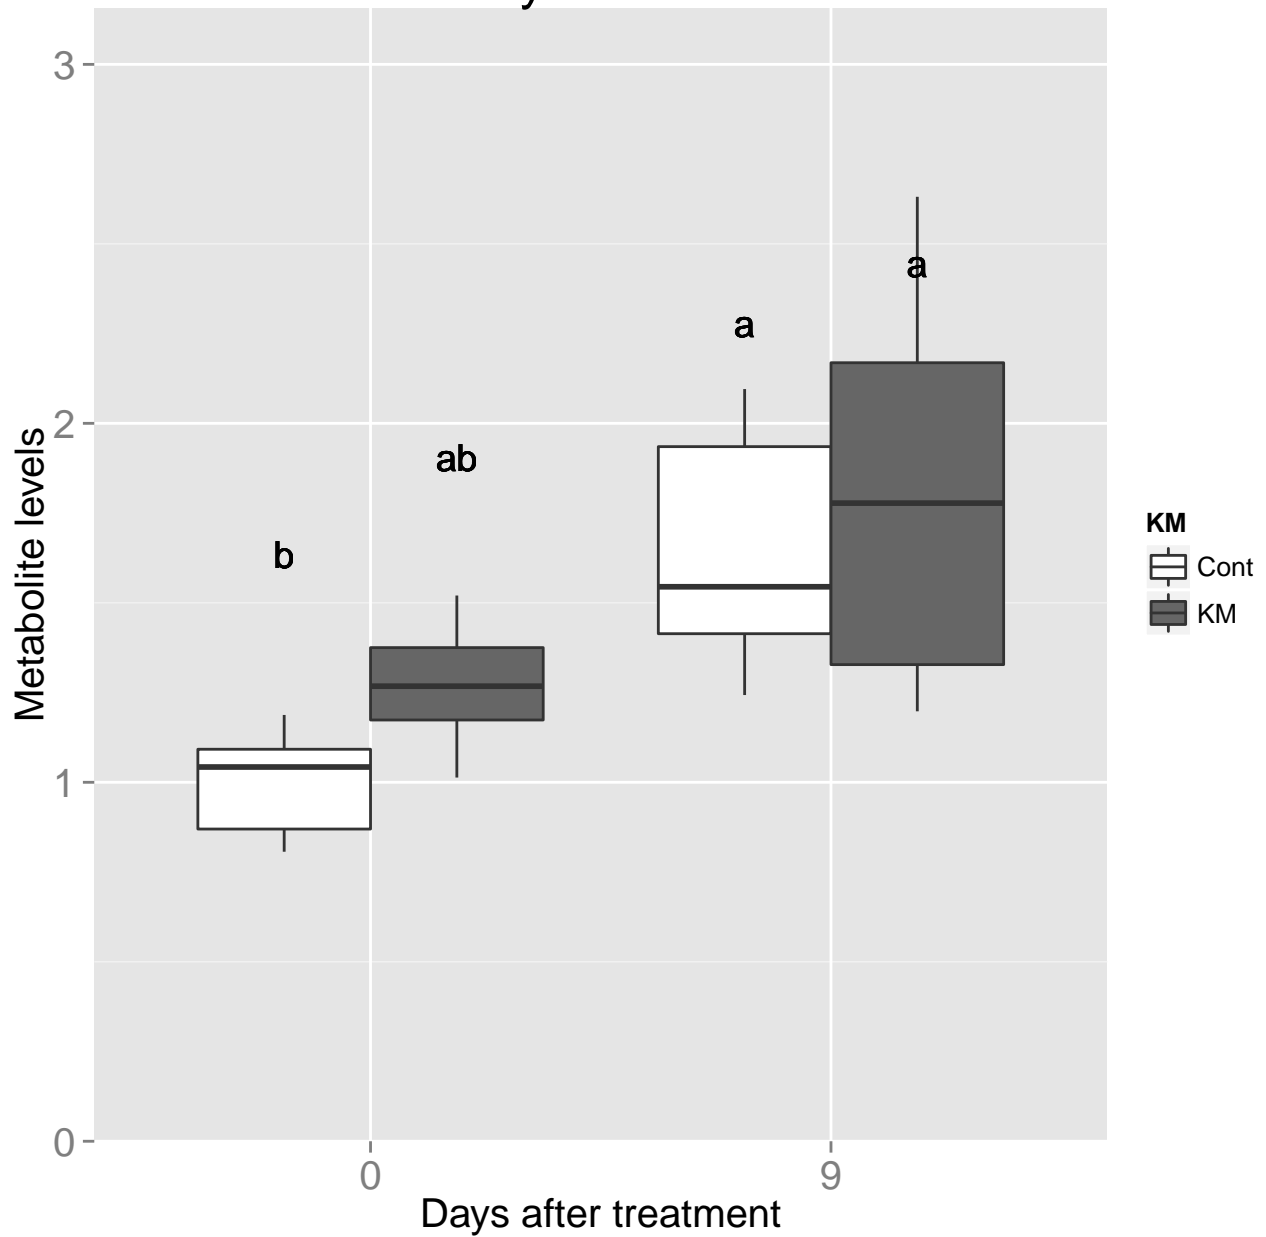



# myo.inositol

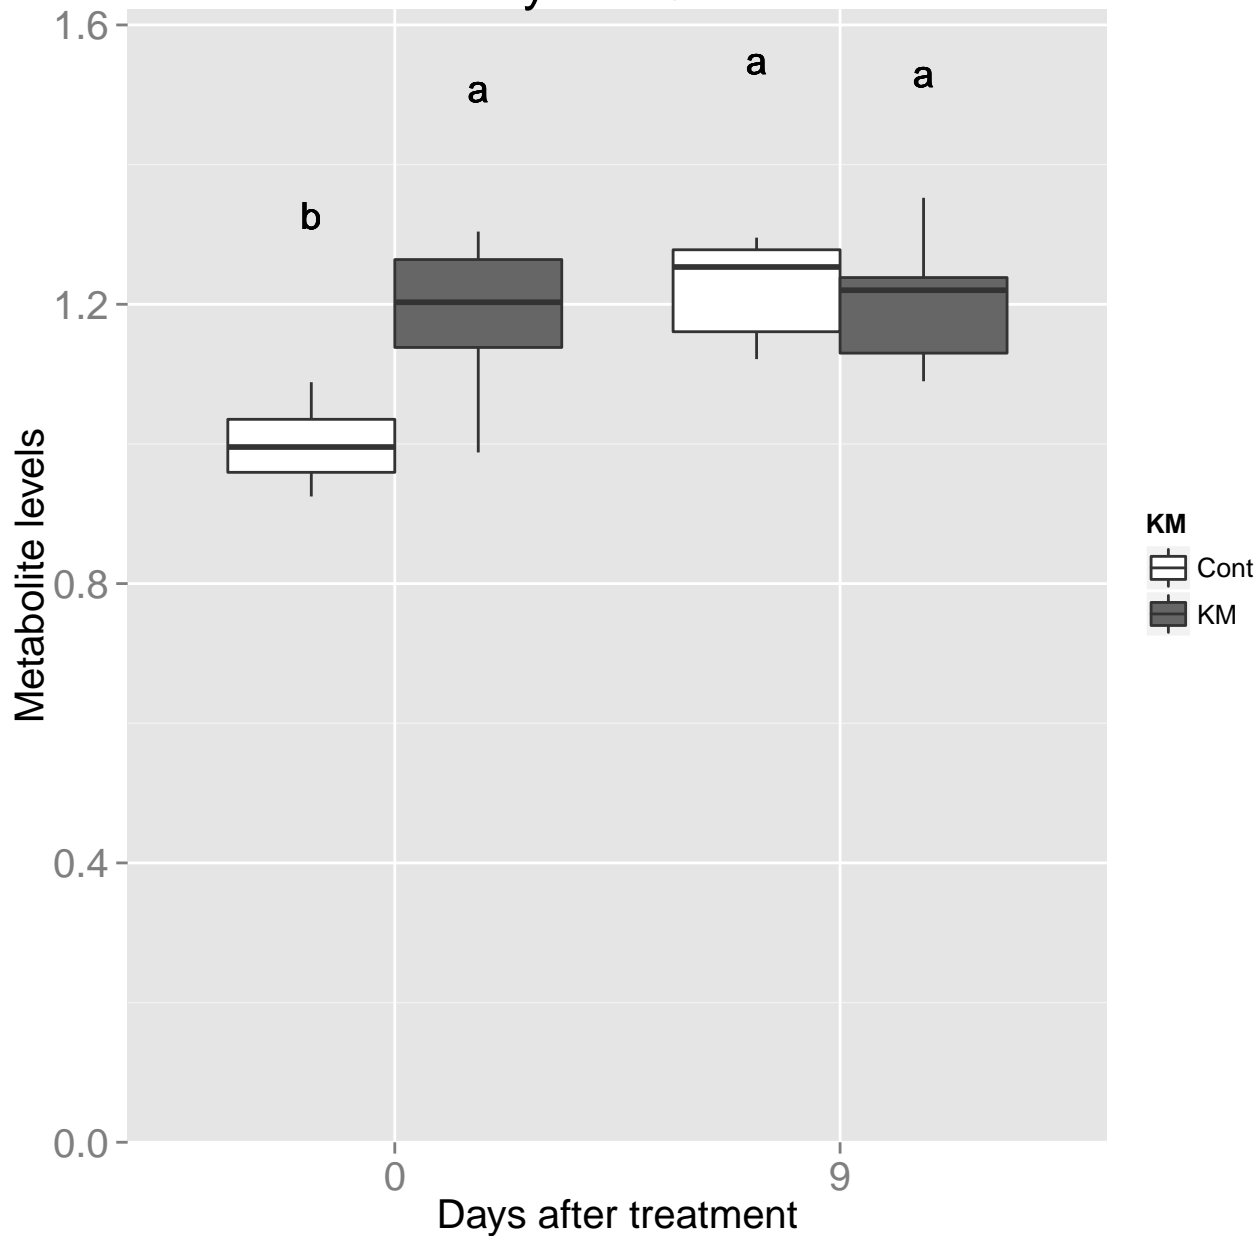

# Tyrosine

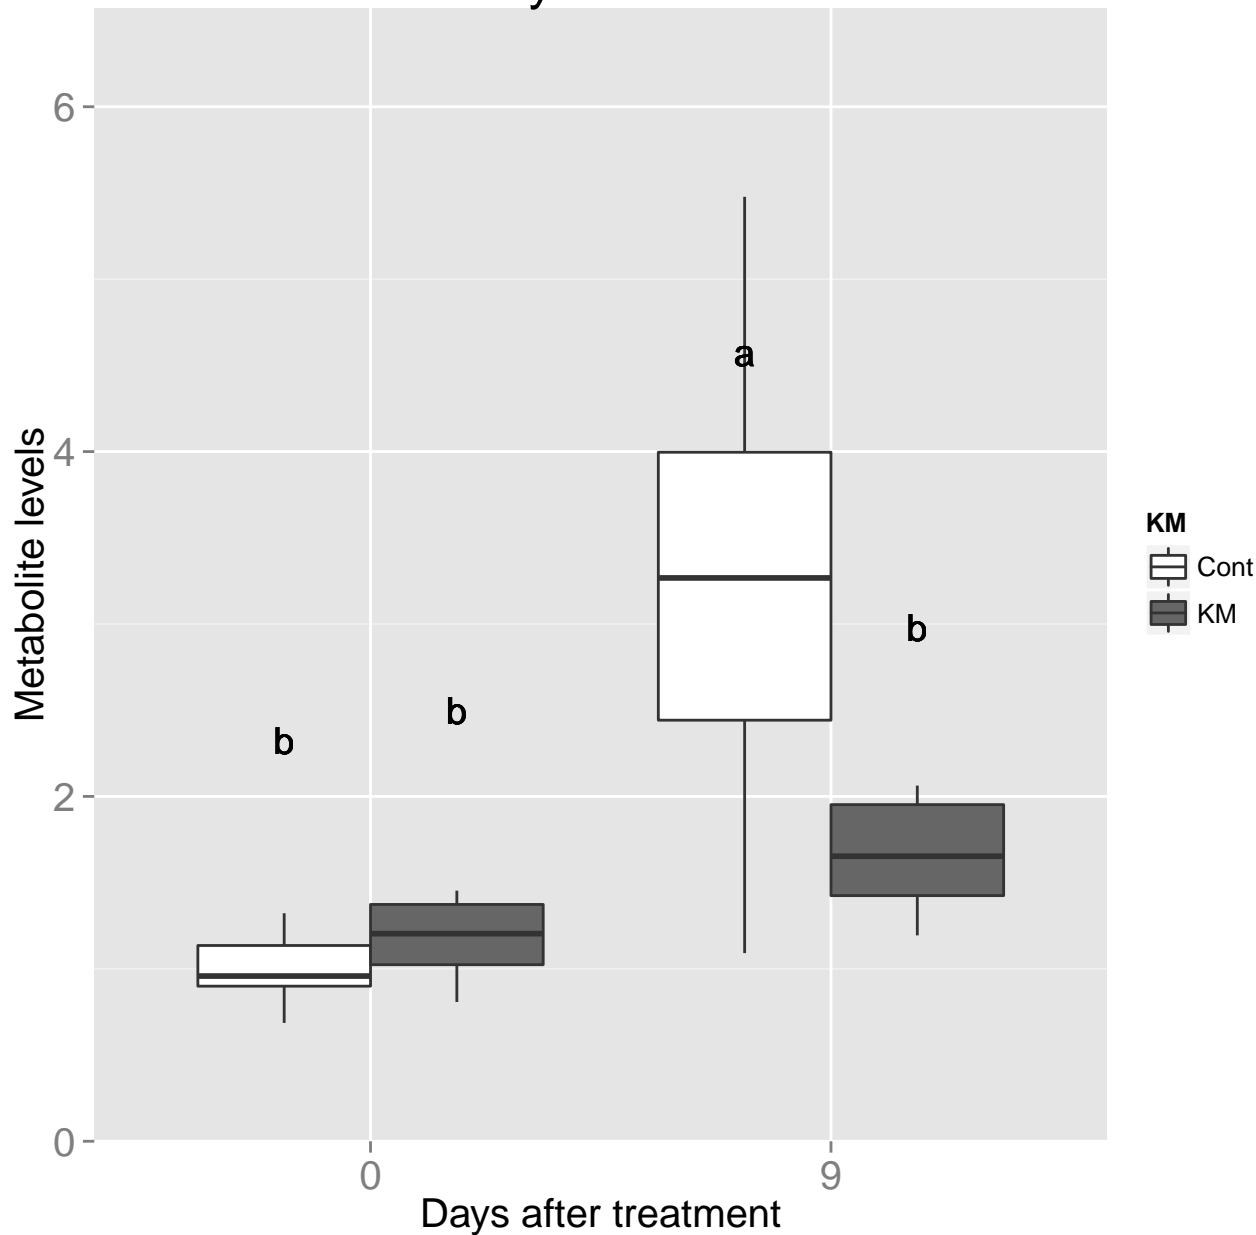

# Histidine

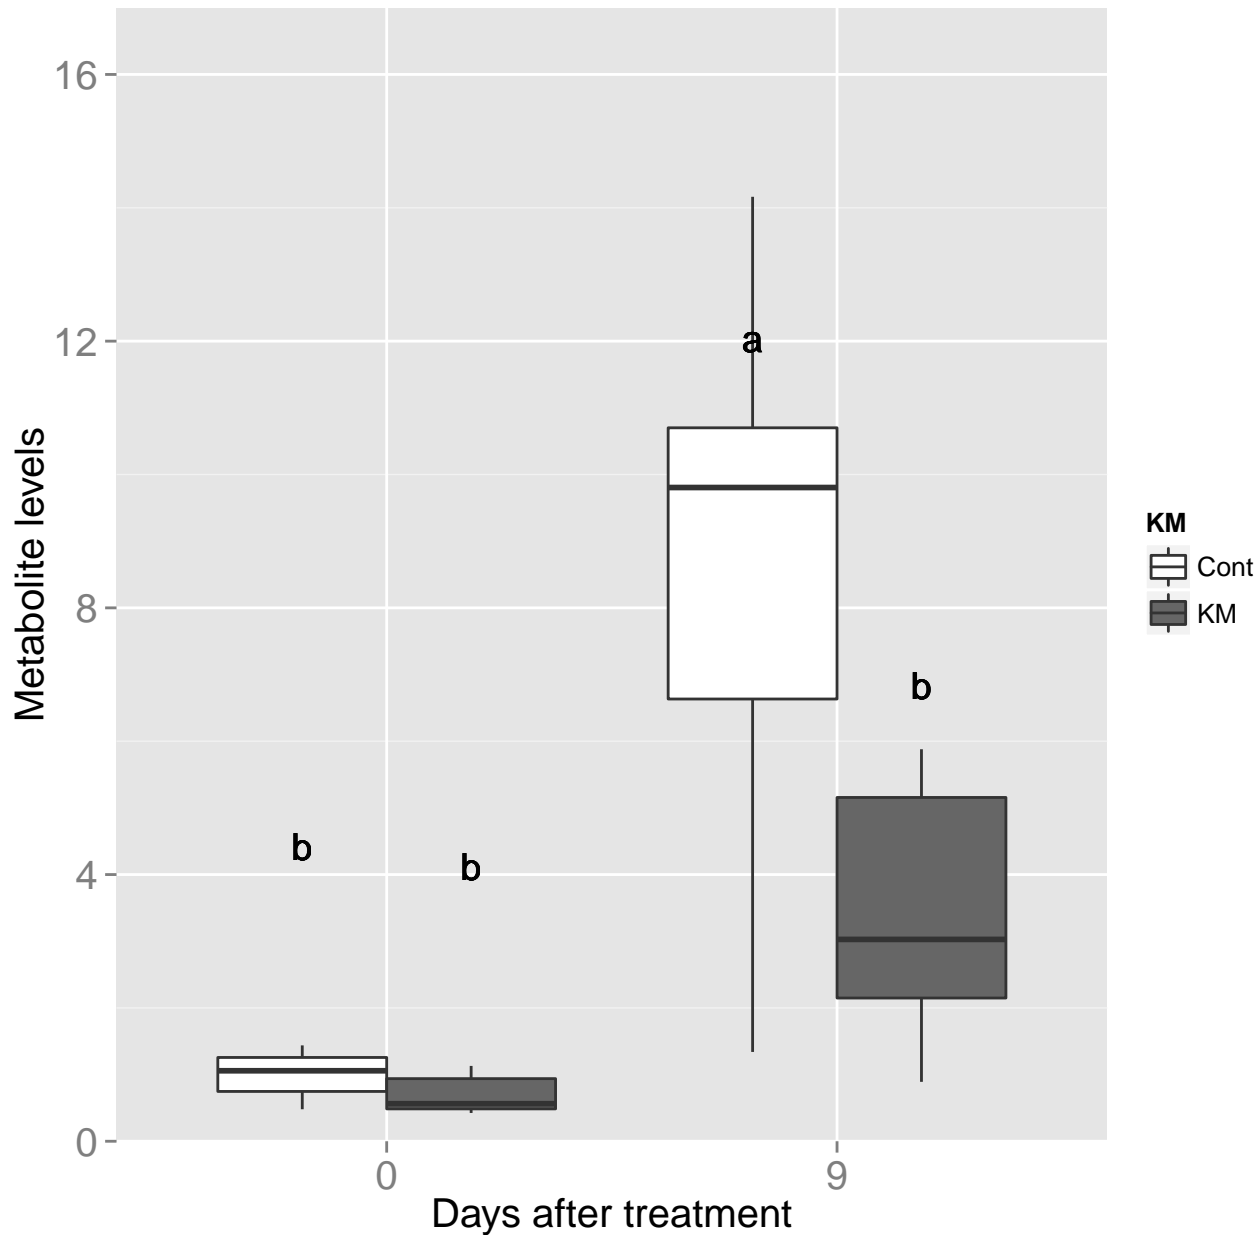

# Adenine

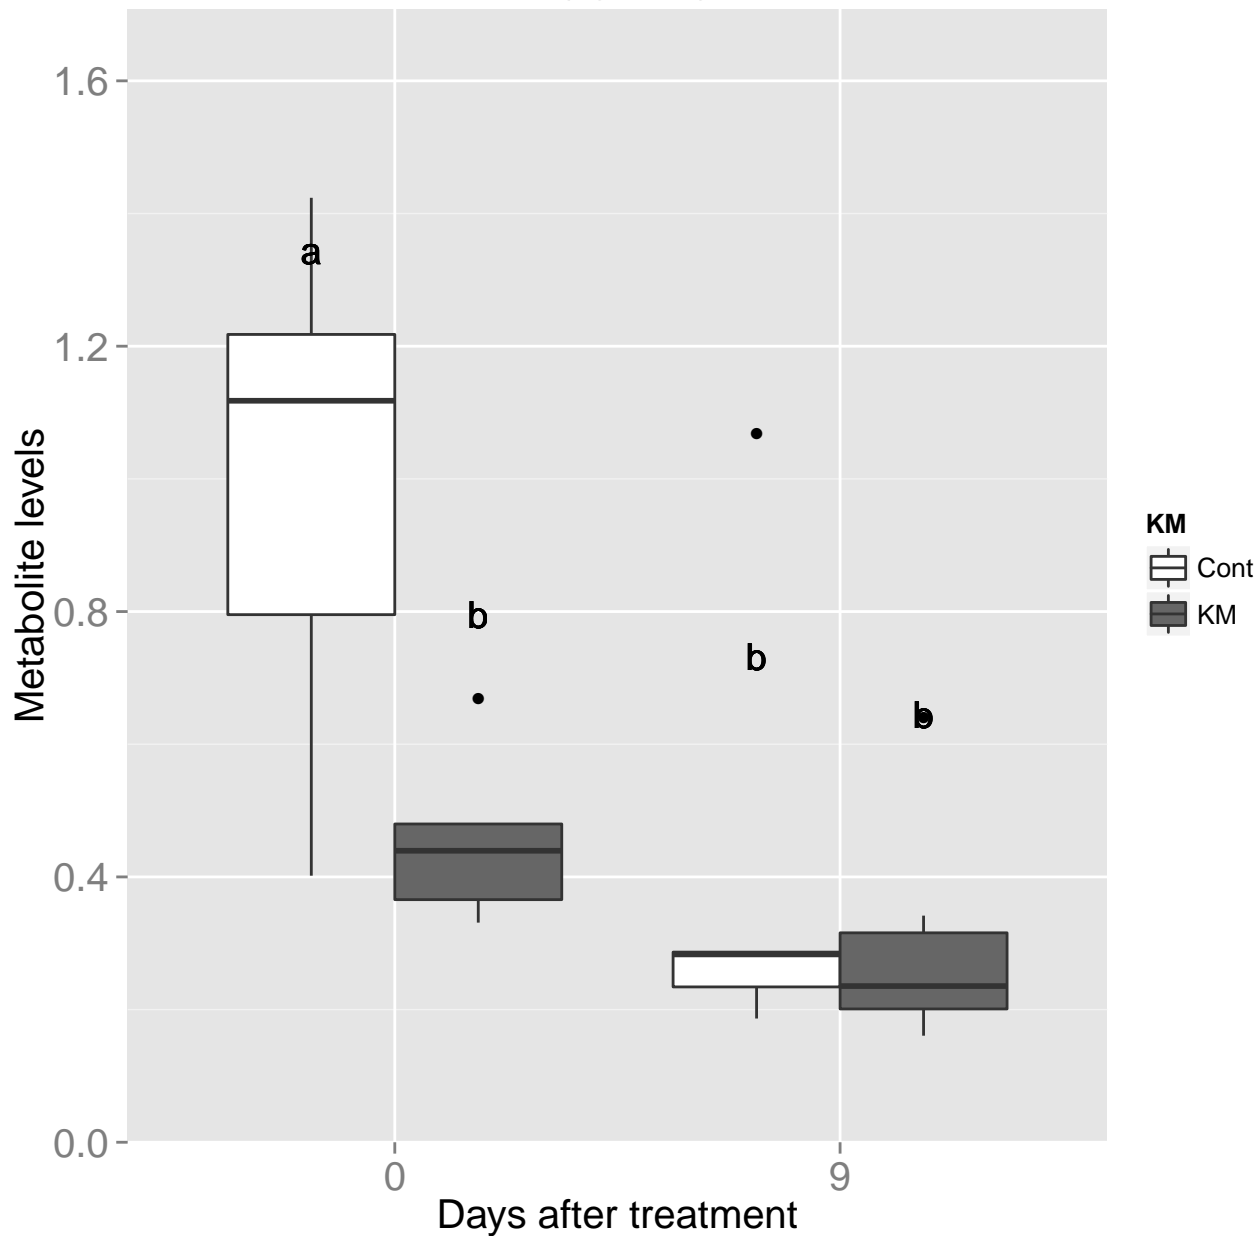

# Tryptophane

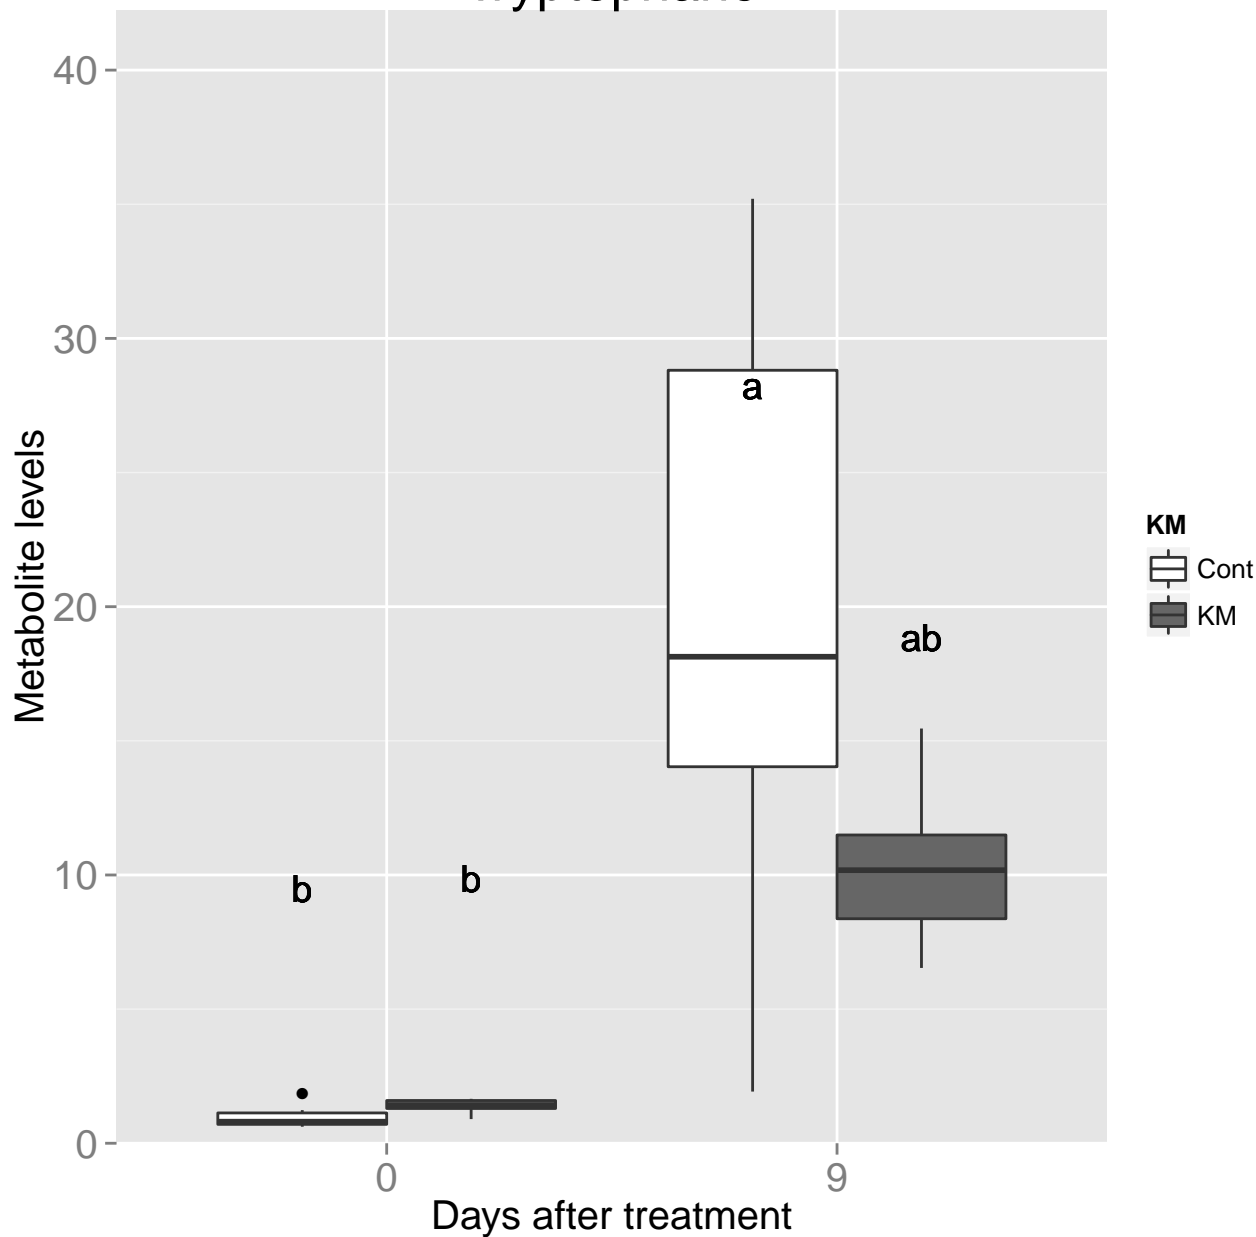

# Sucrose

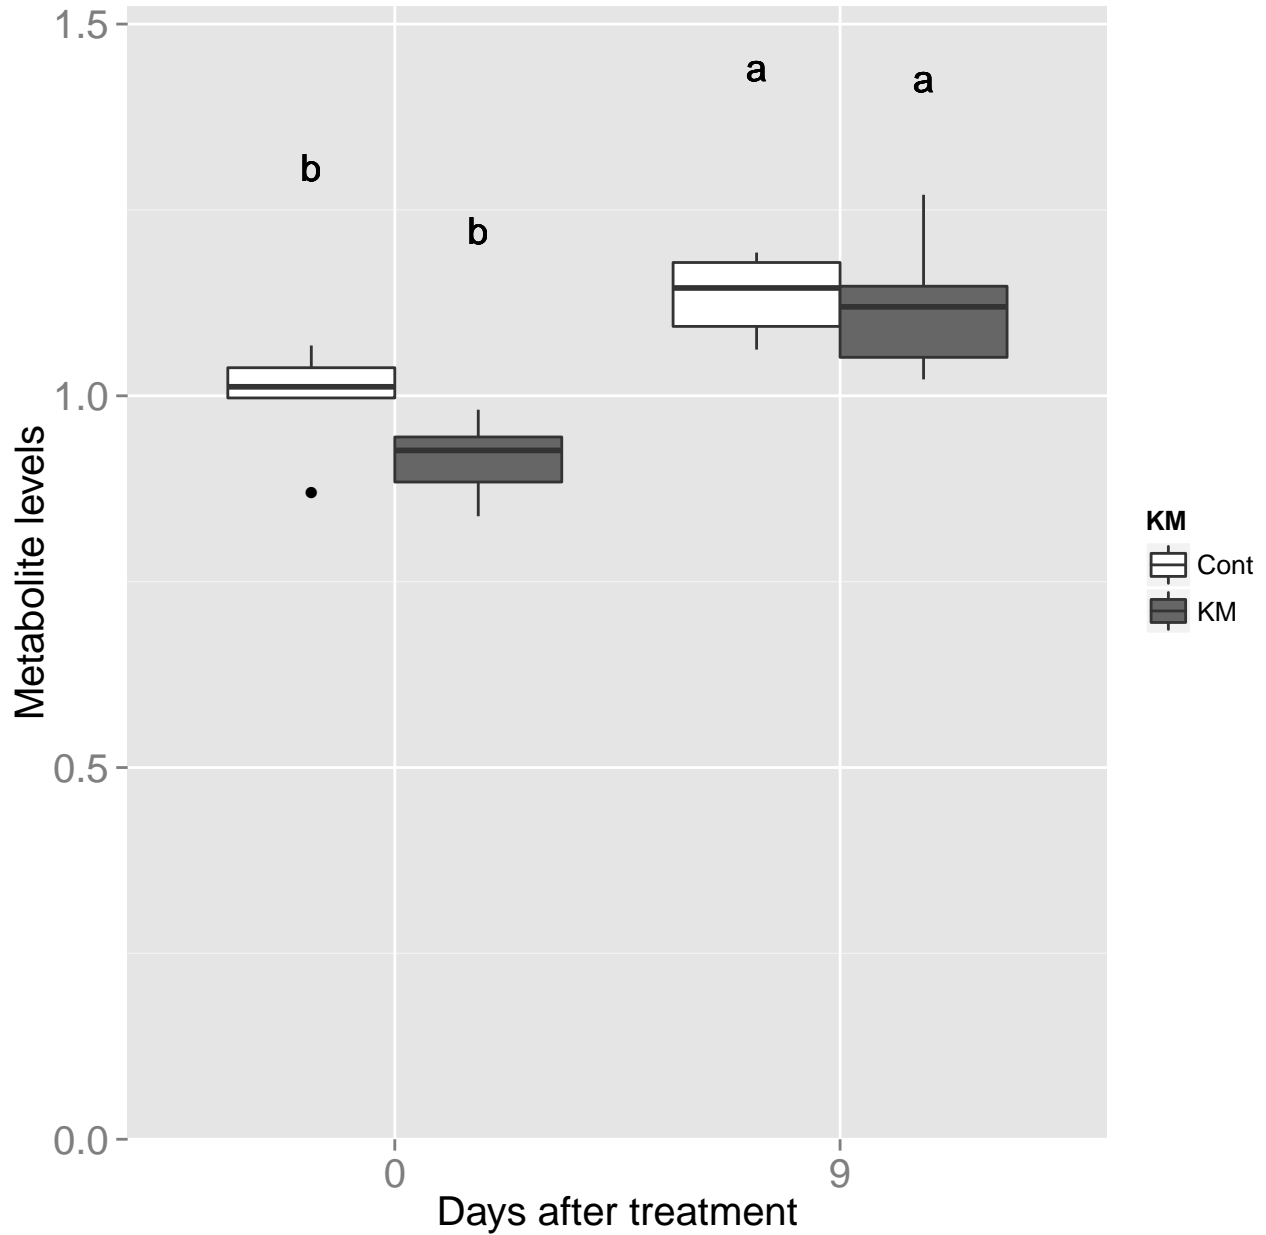

# Cellulose

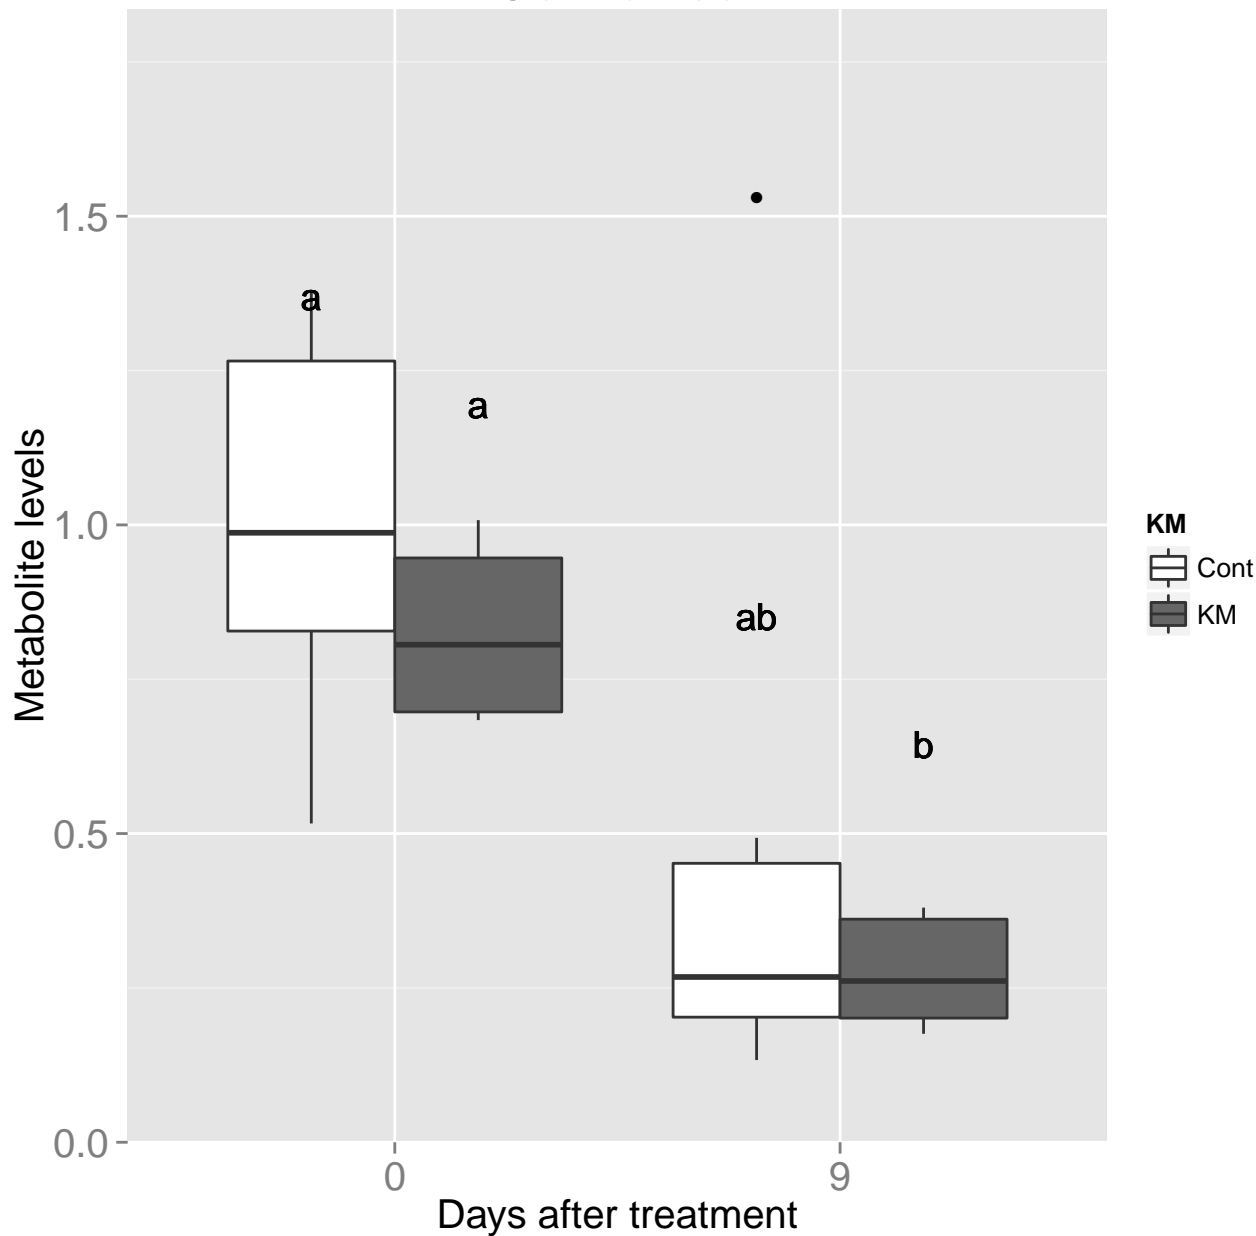

# Maltose

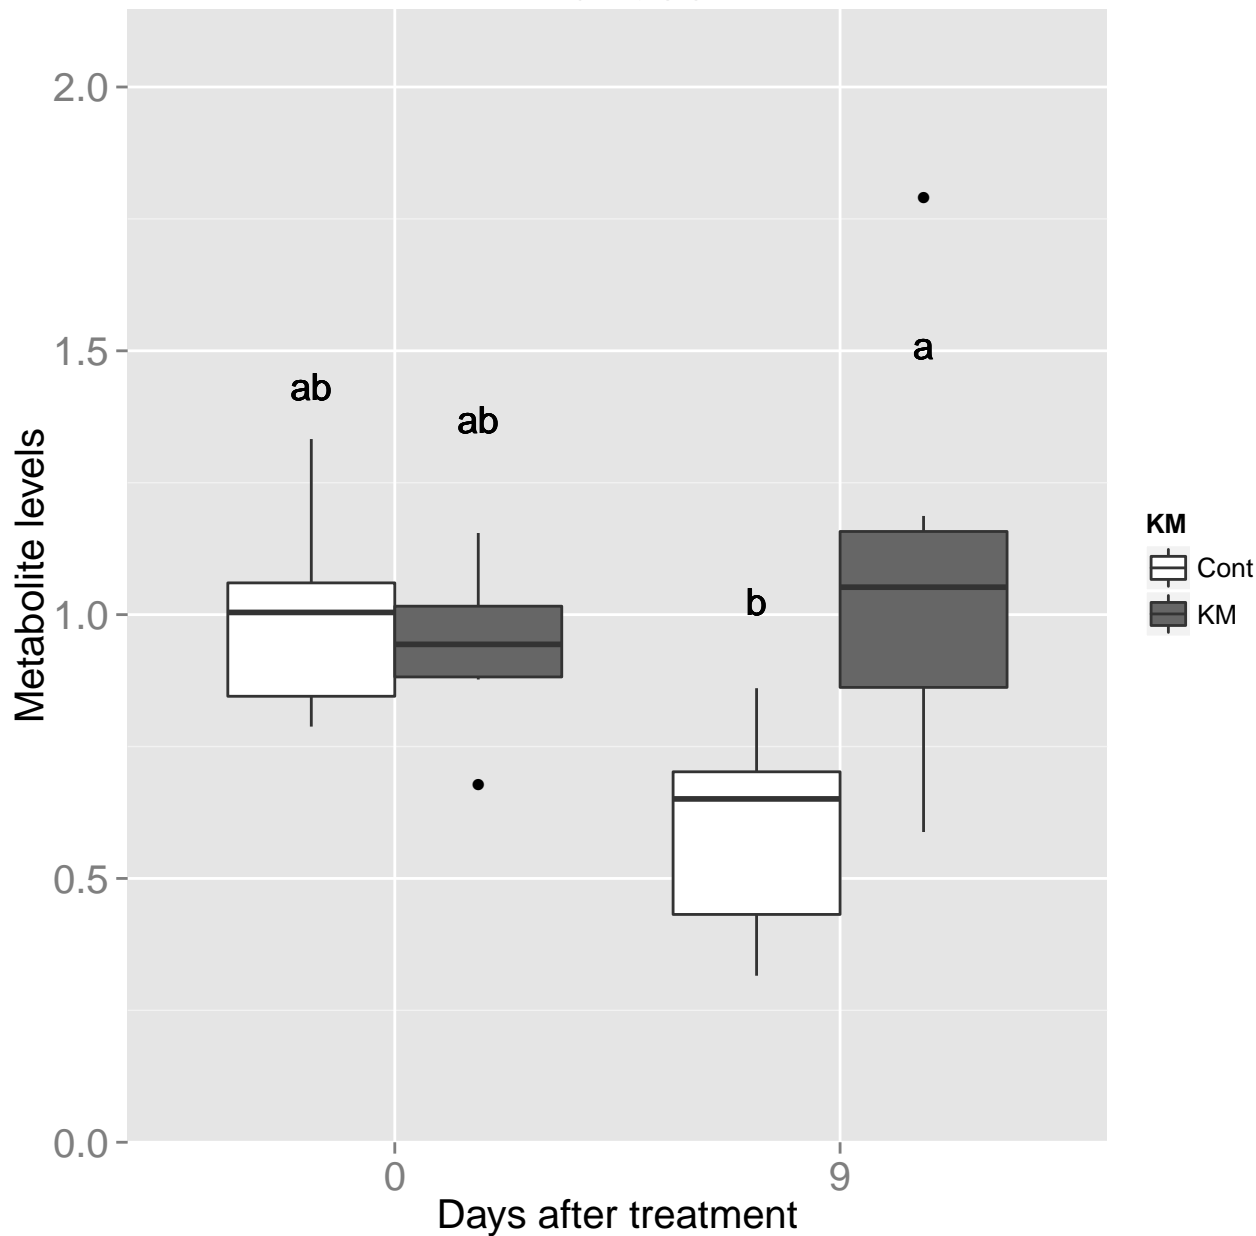



# Trehalose

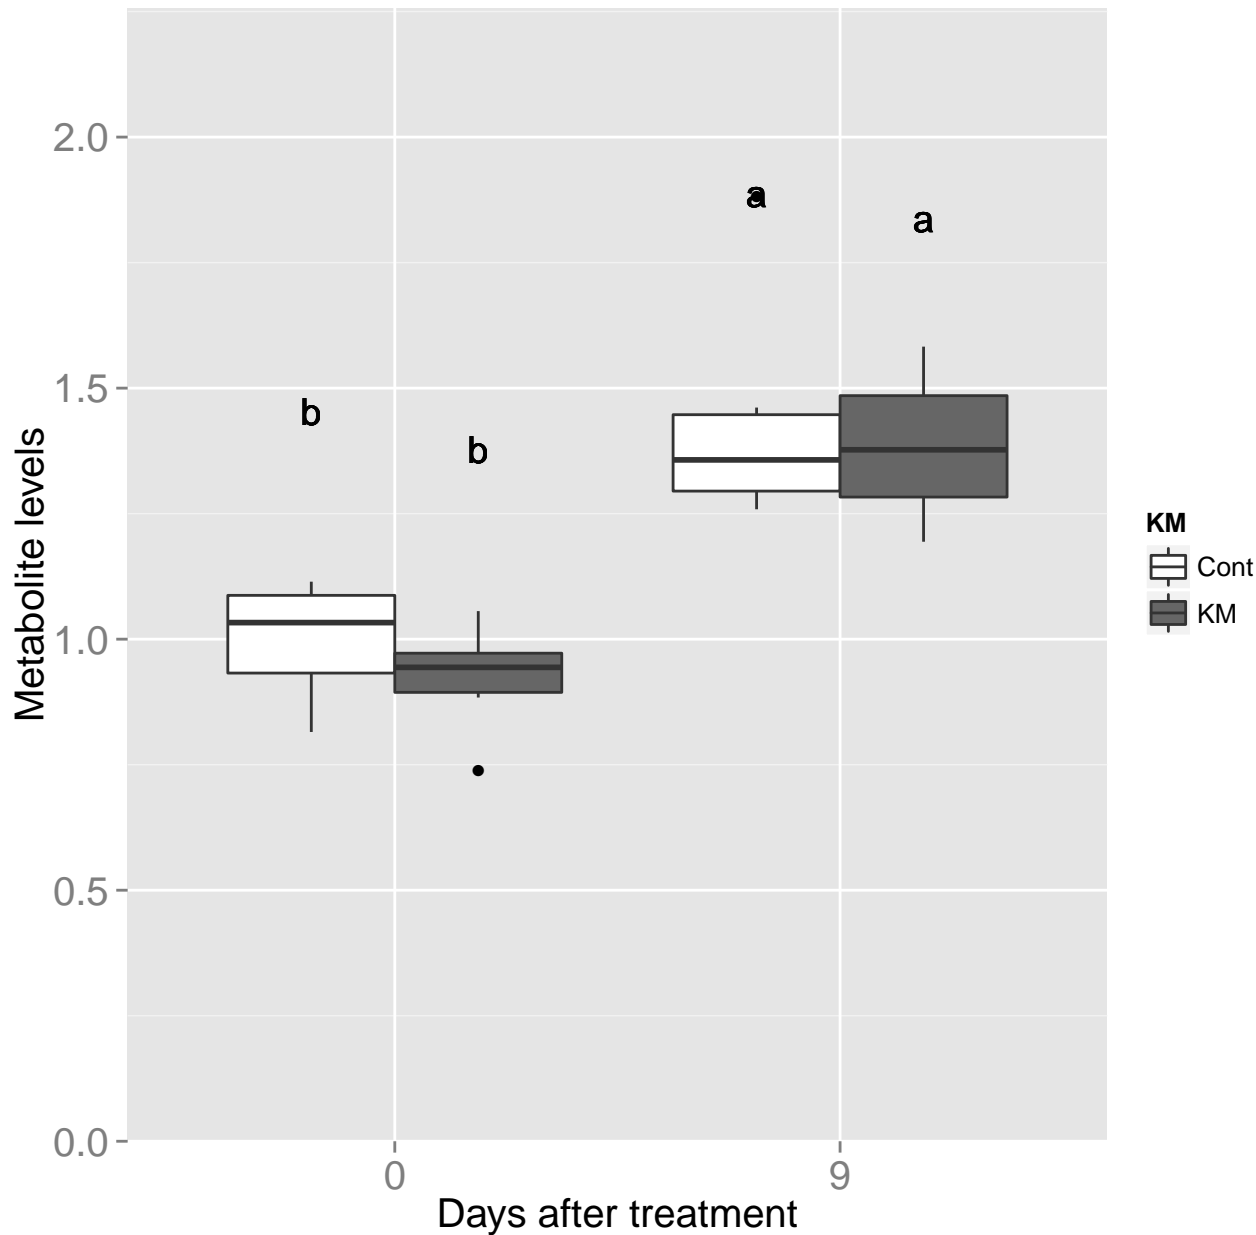

# Galactinol

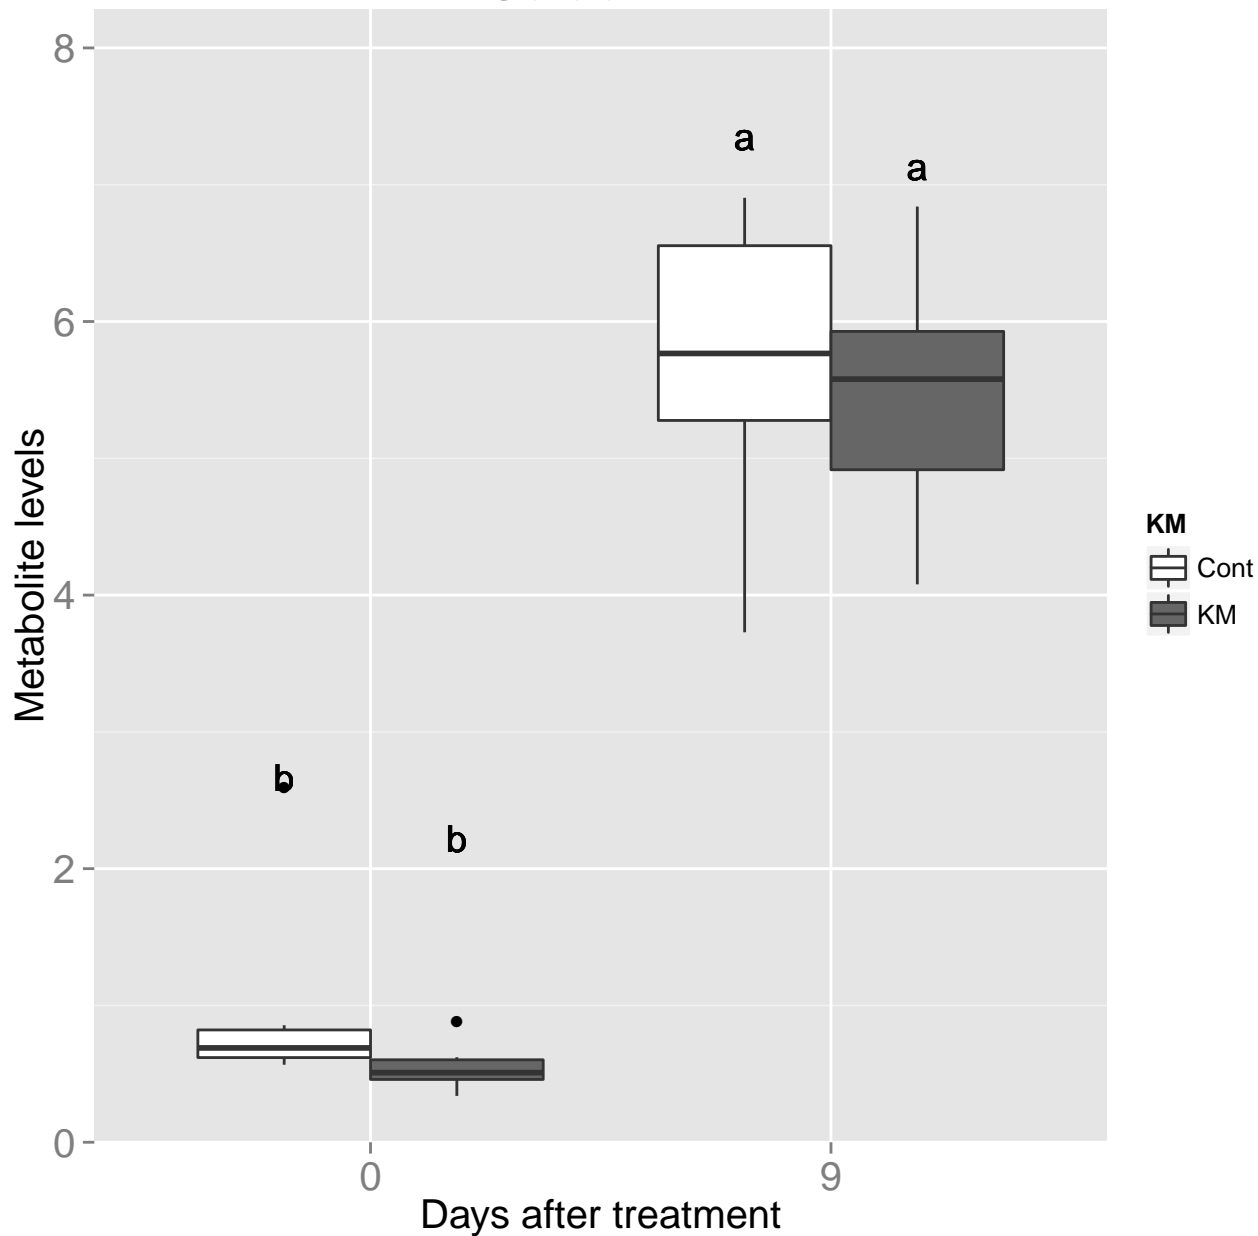

# Raffinose

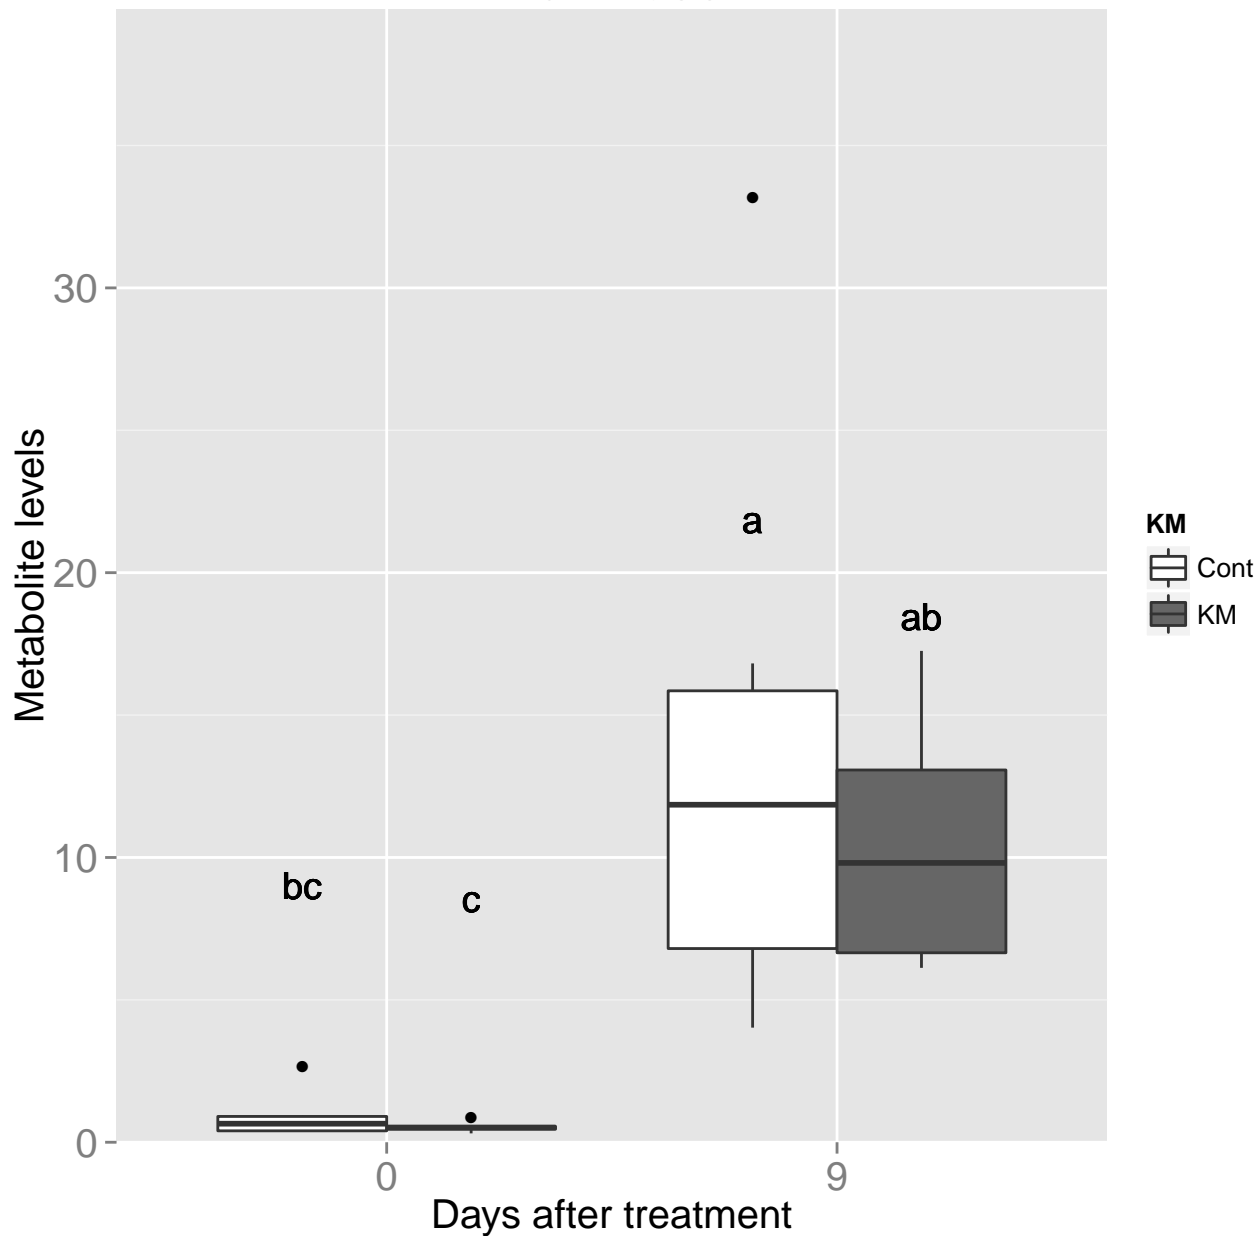

## Alanine

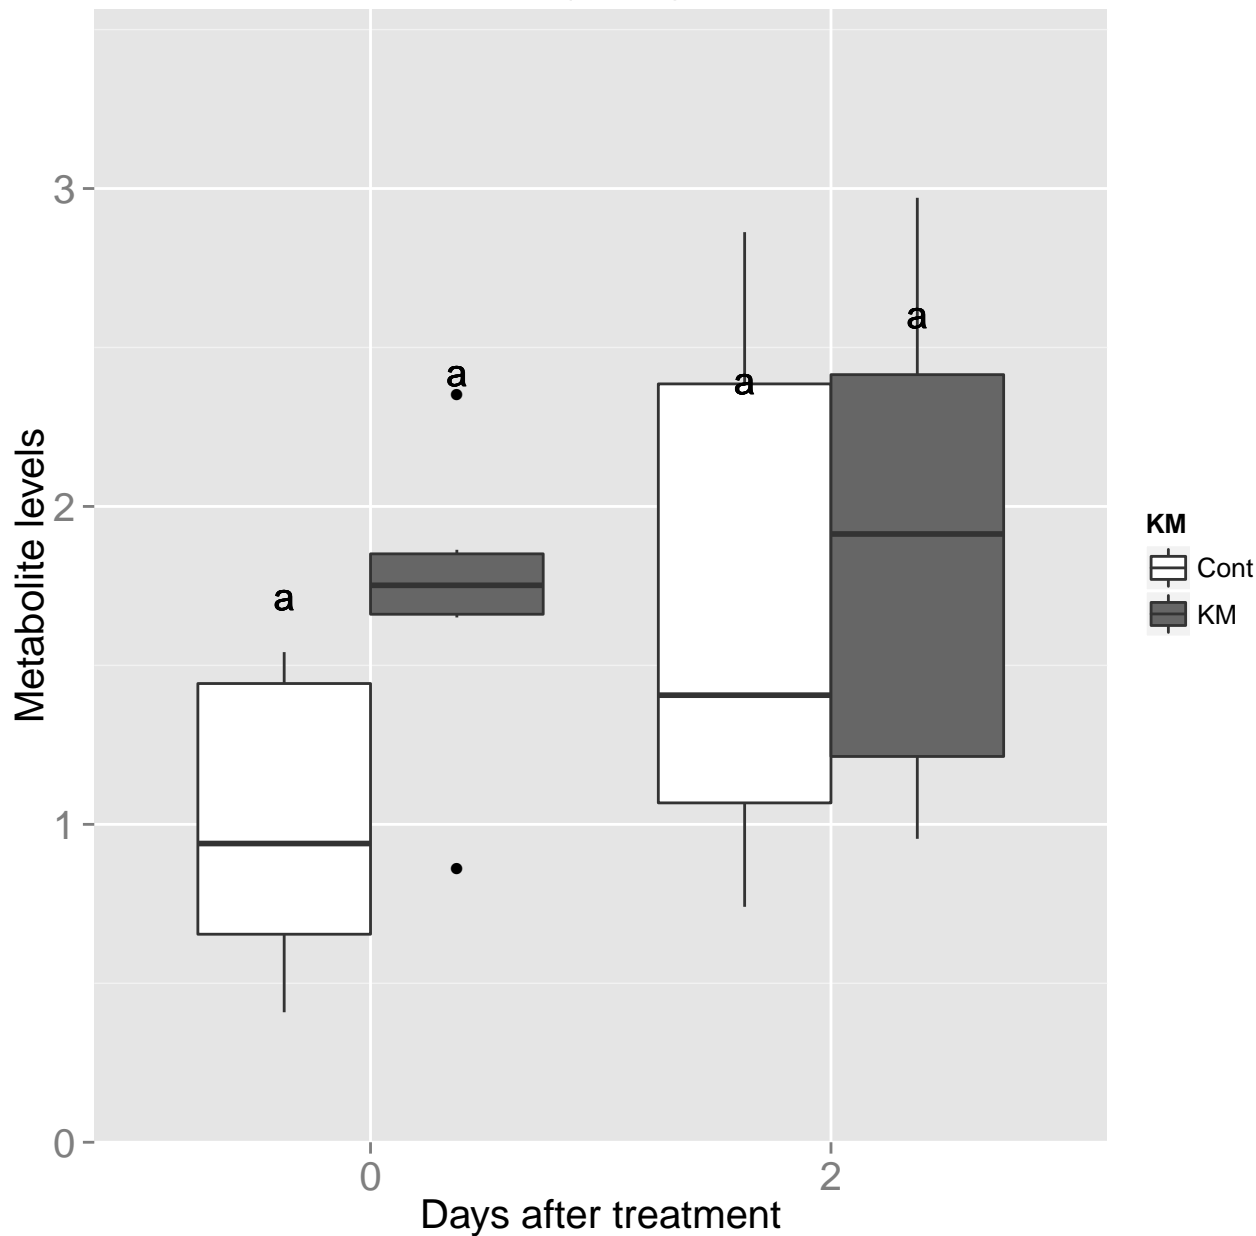

# Pyruvate

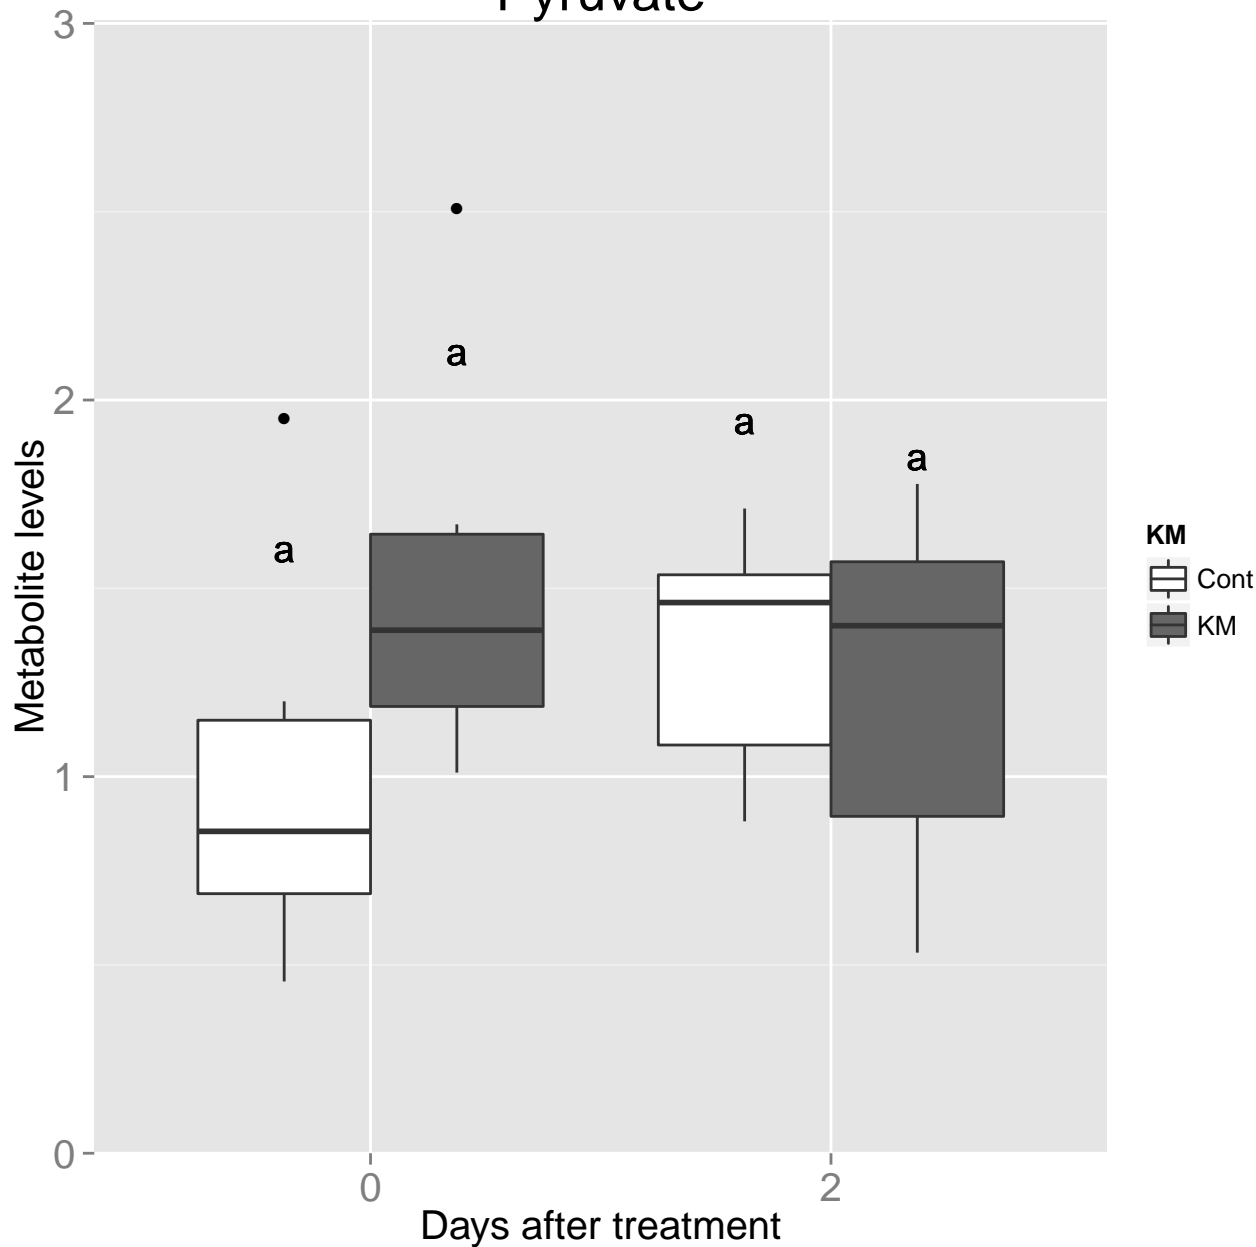

# Valine

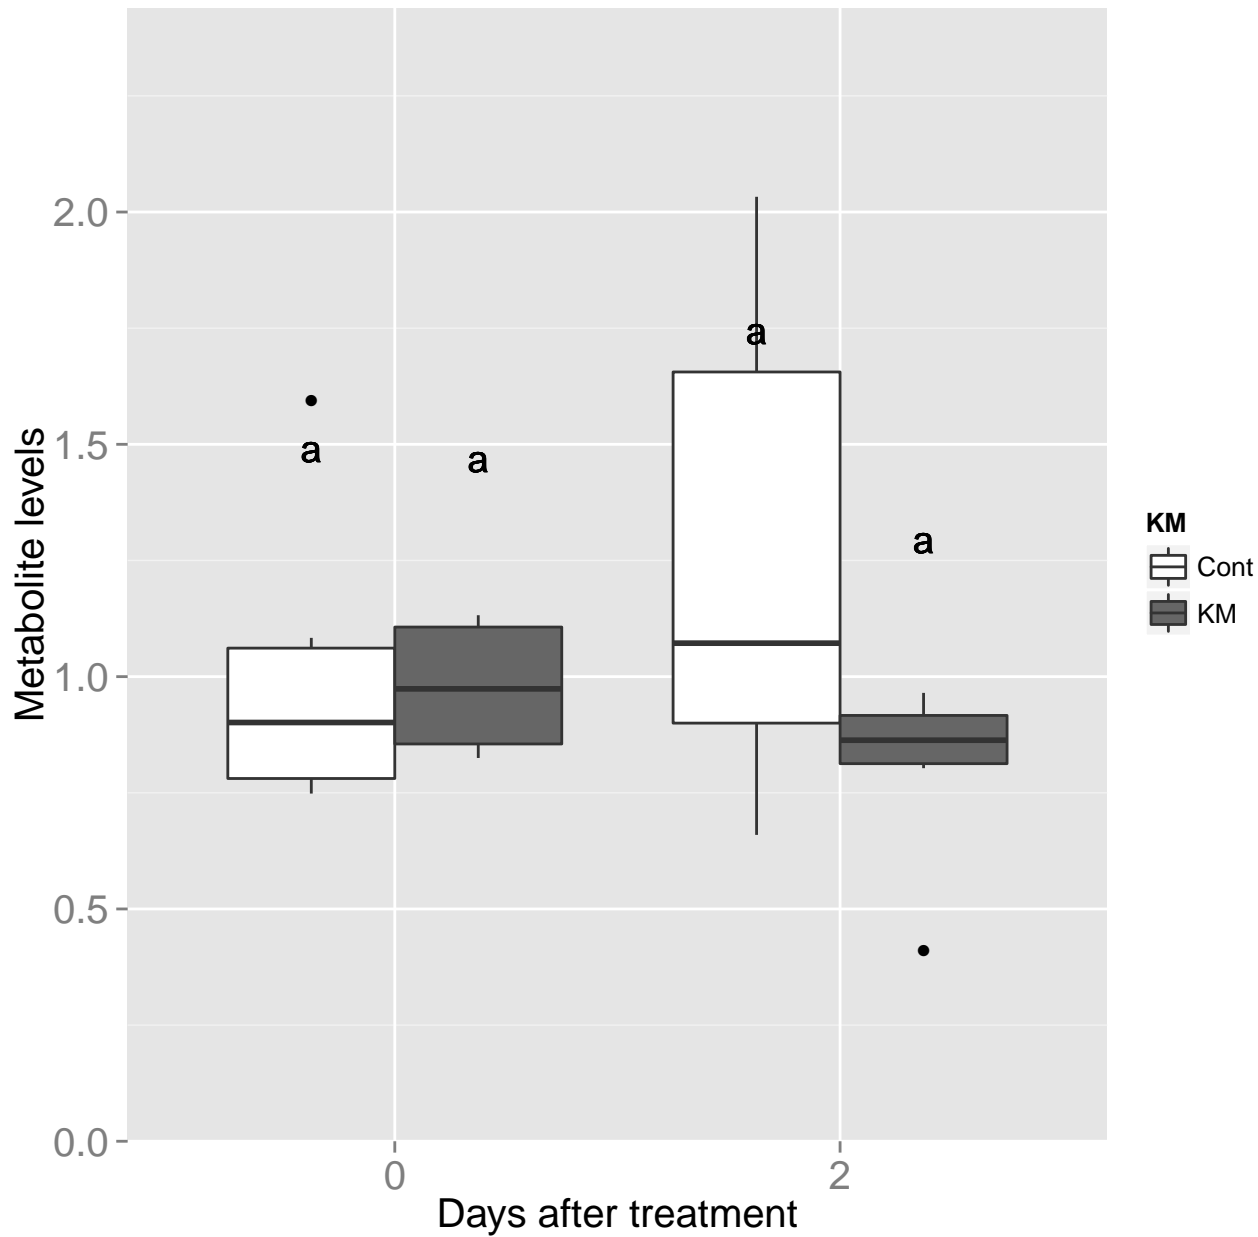

# Glycerol

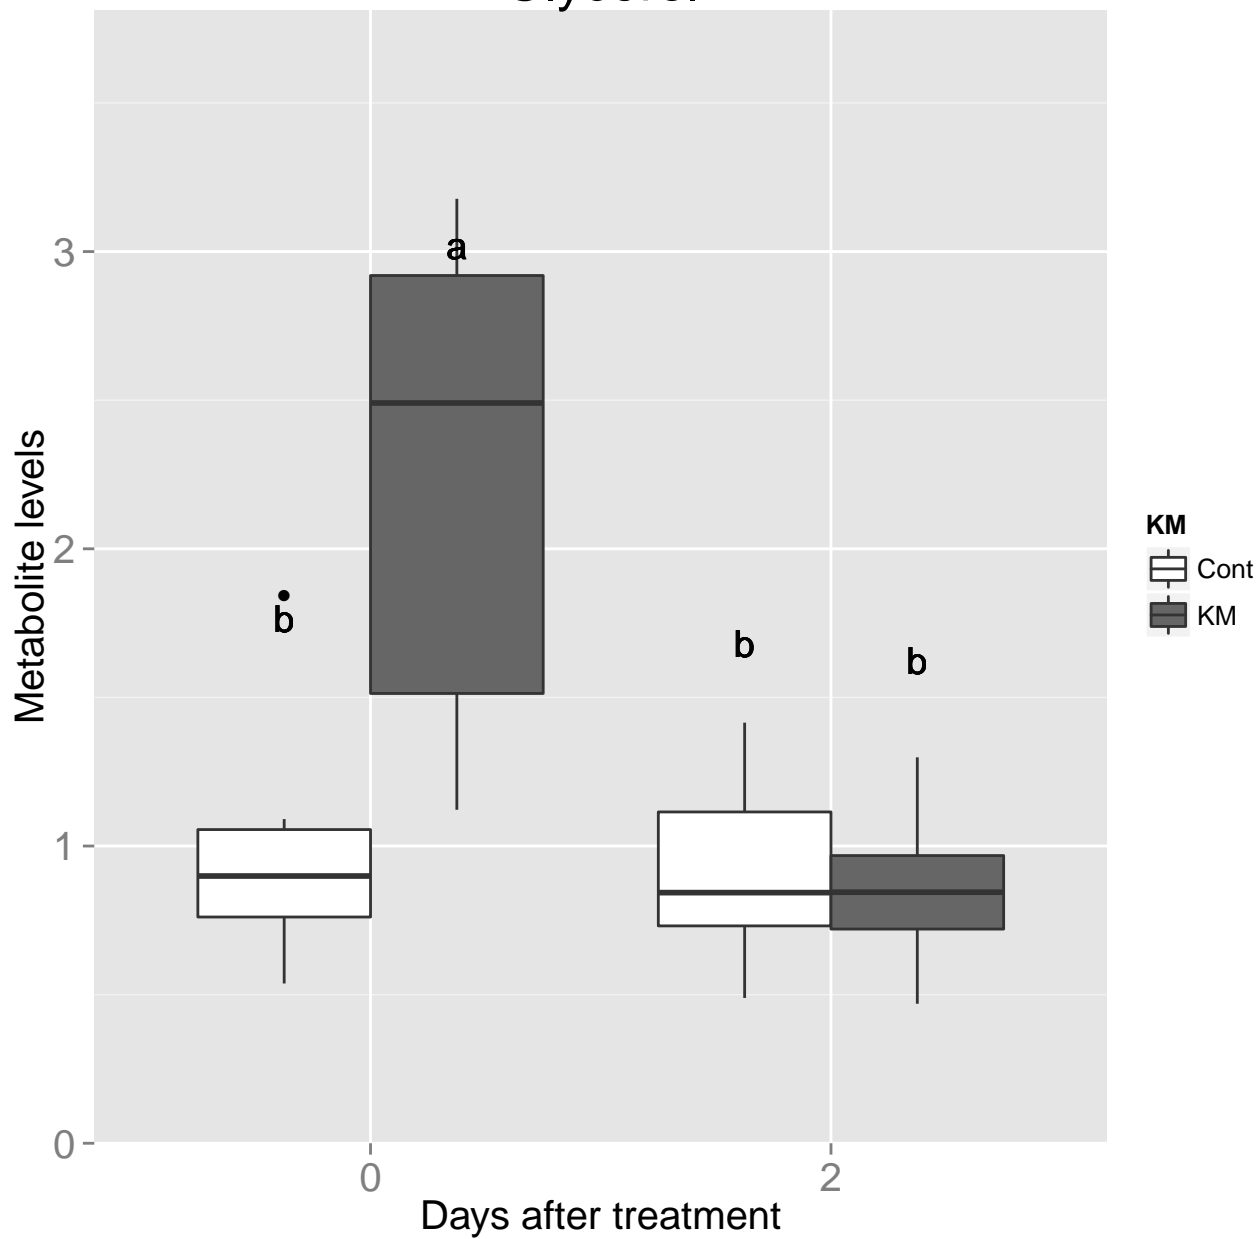

# Malonate

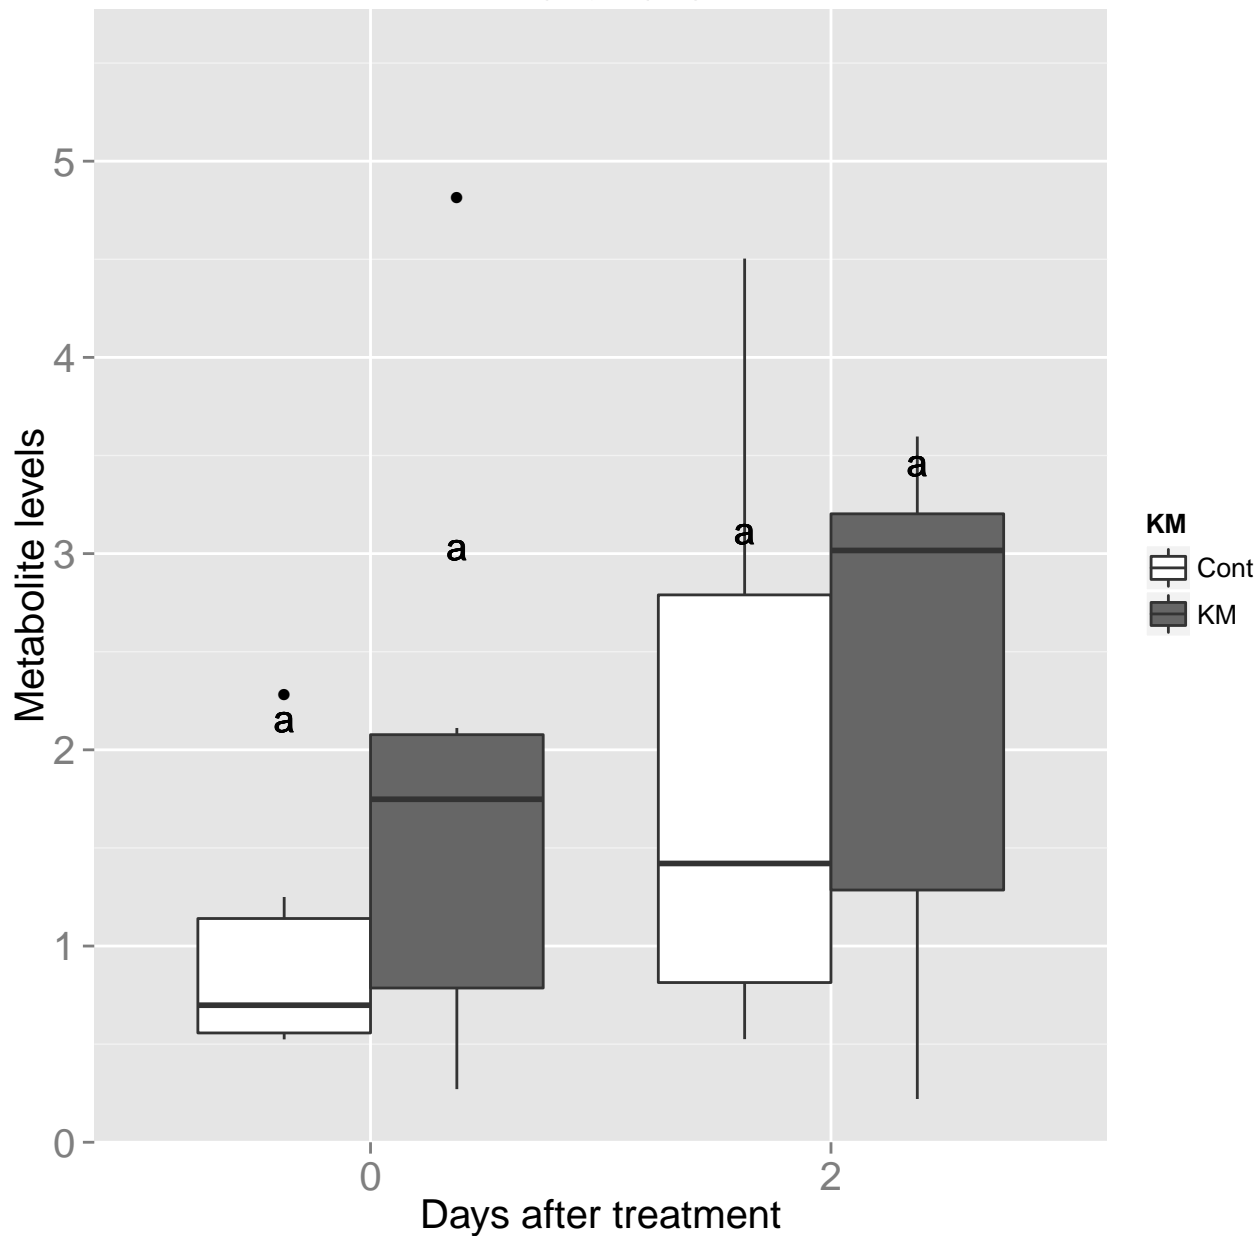



# Isoleucine

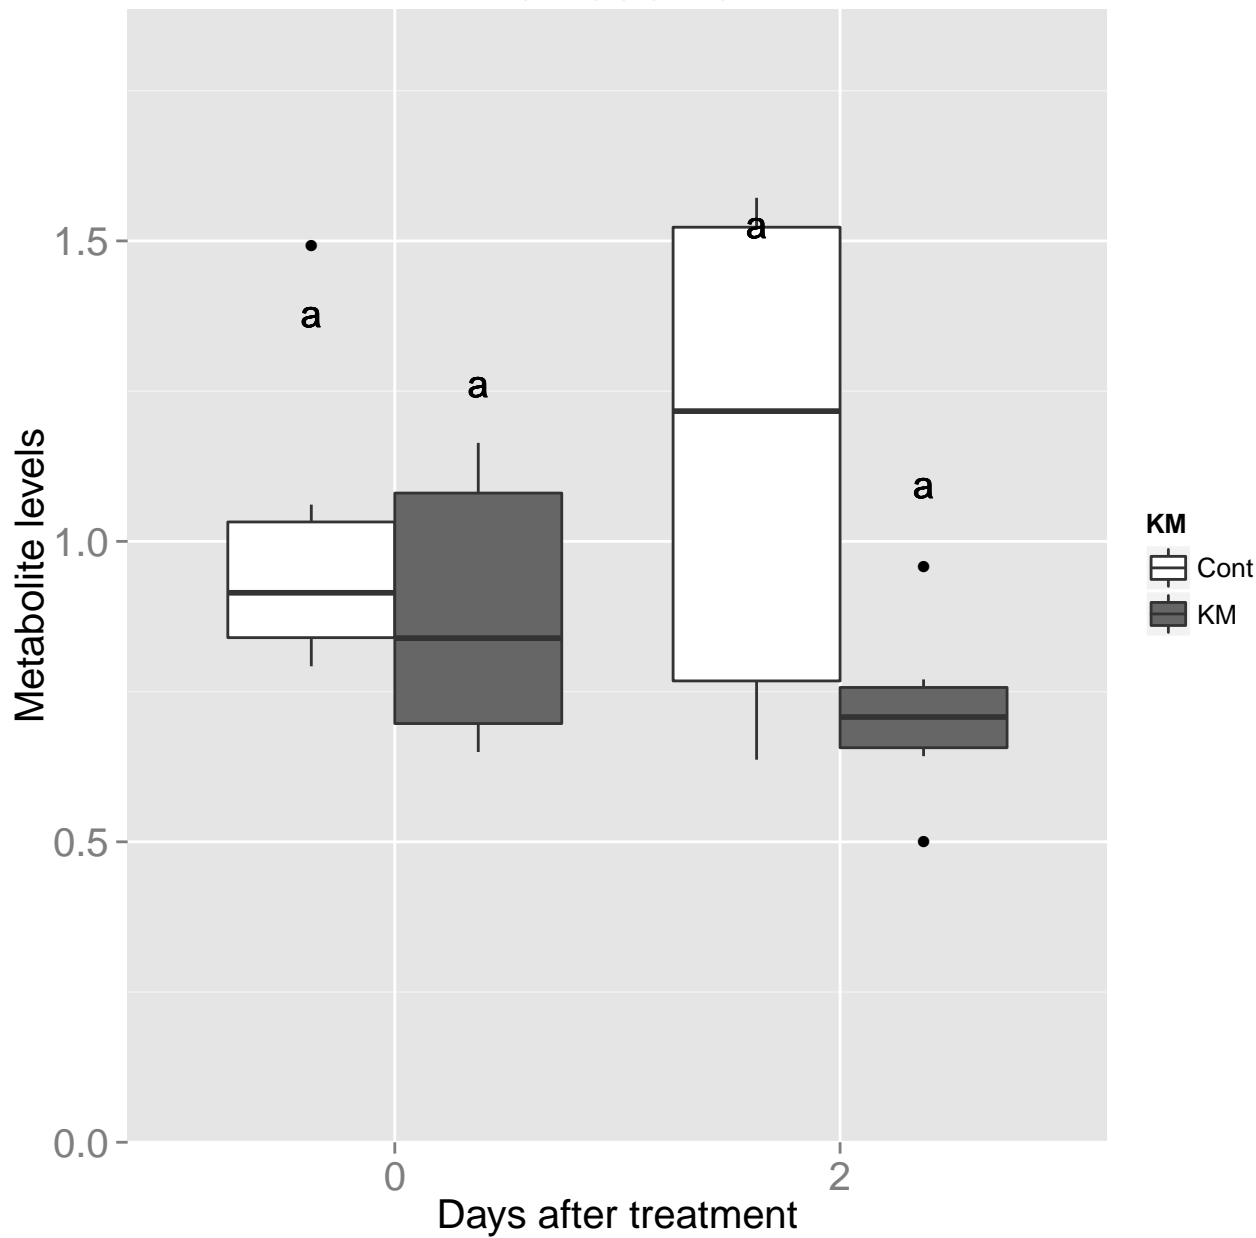

# Glycine

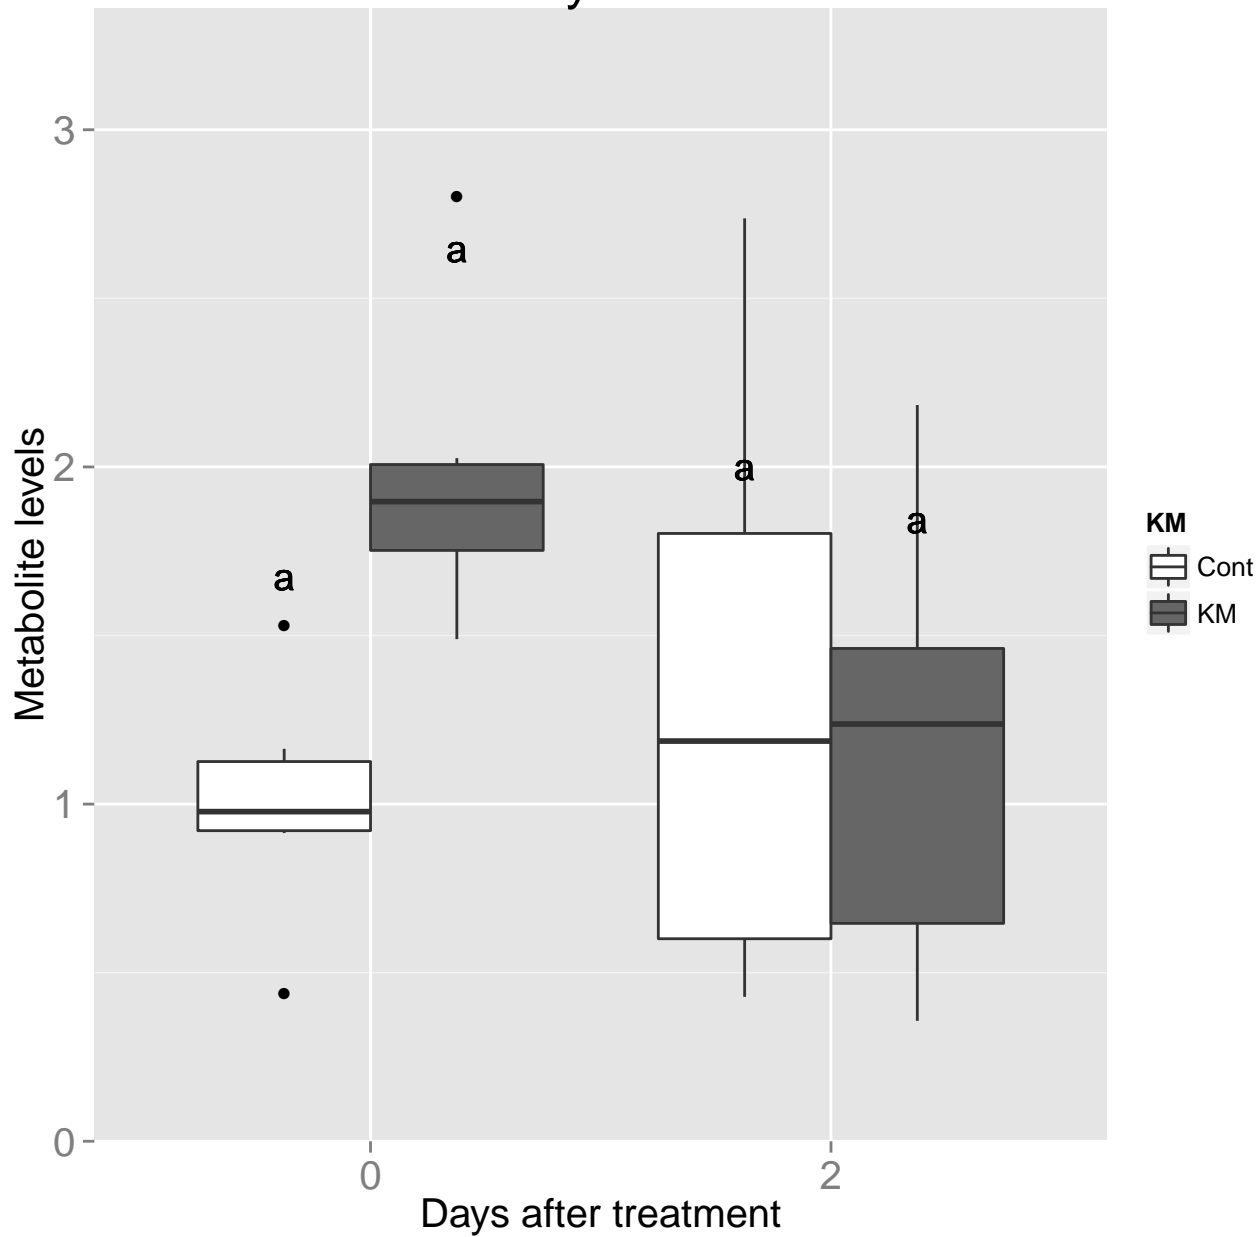

# Phosphate

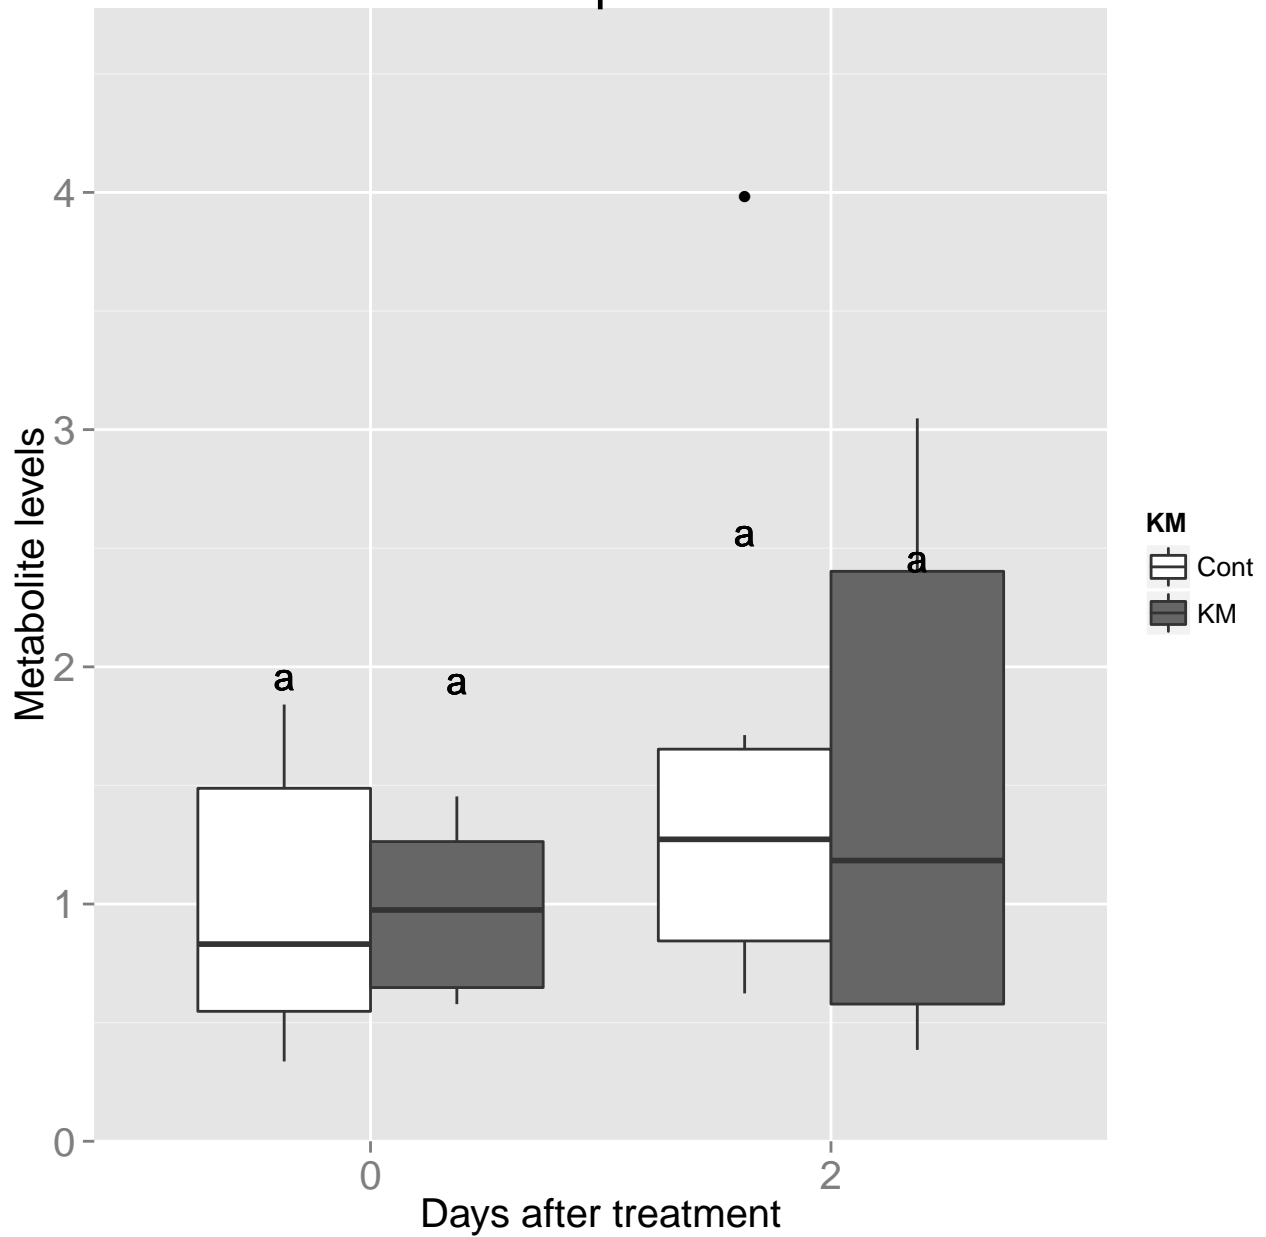

# Proline

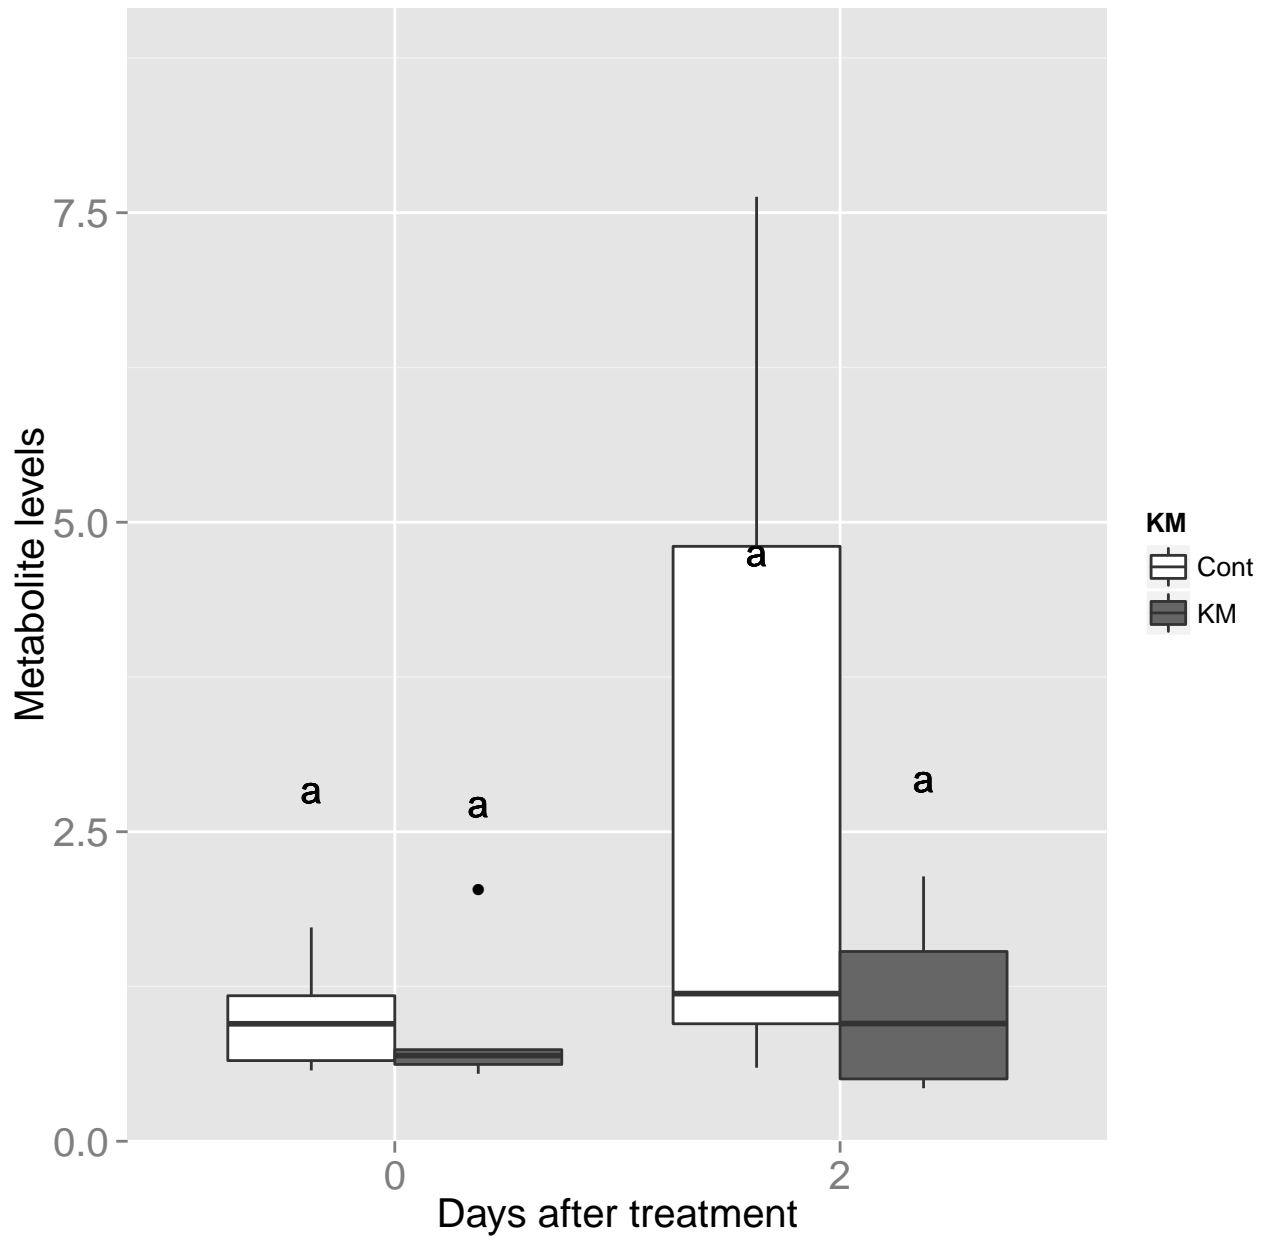

# Glycerate

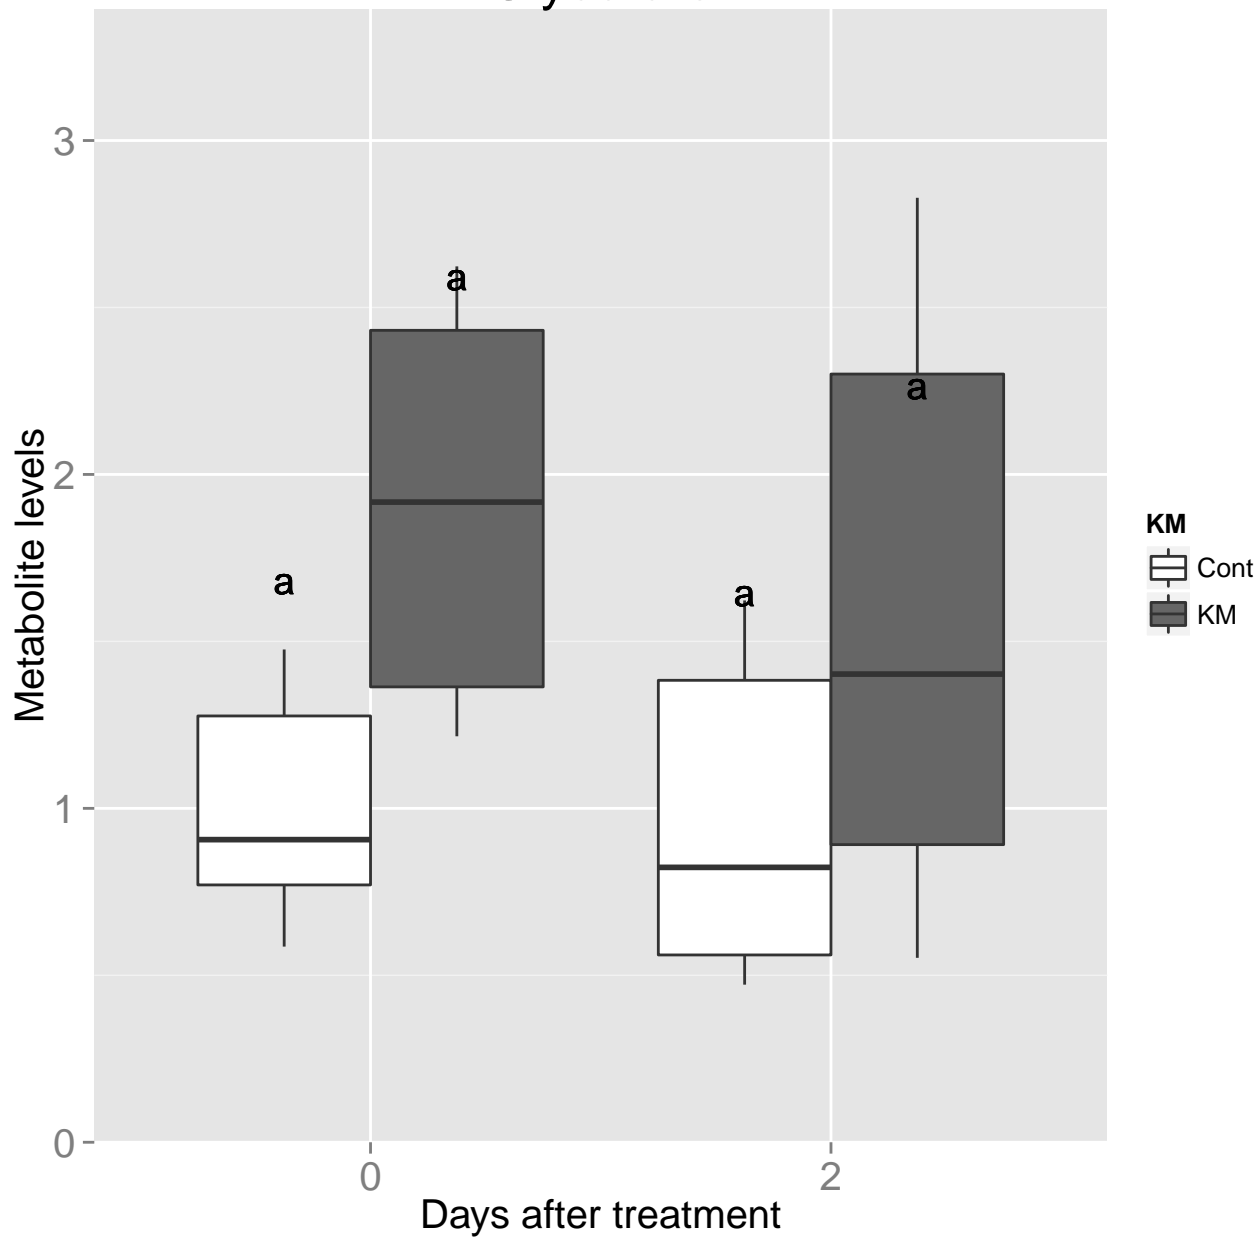

# Benzoate

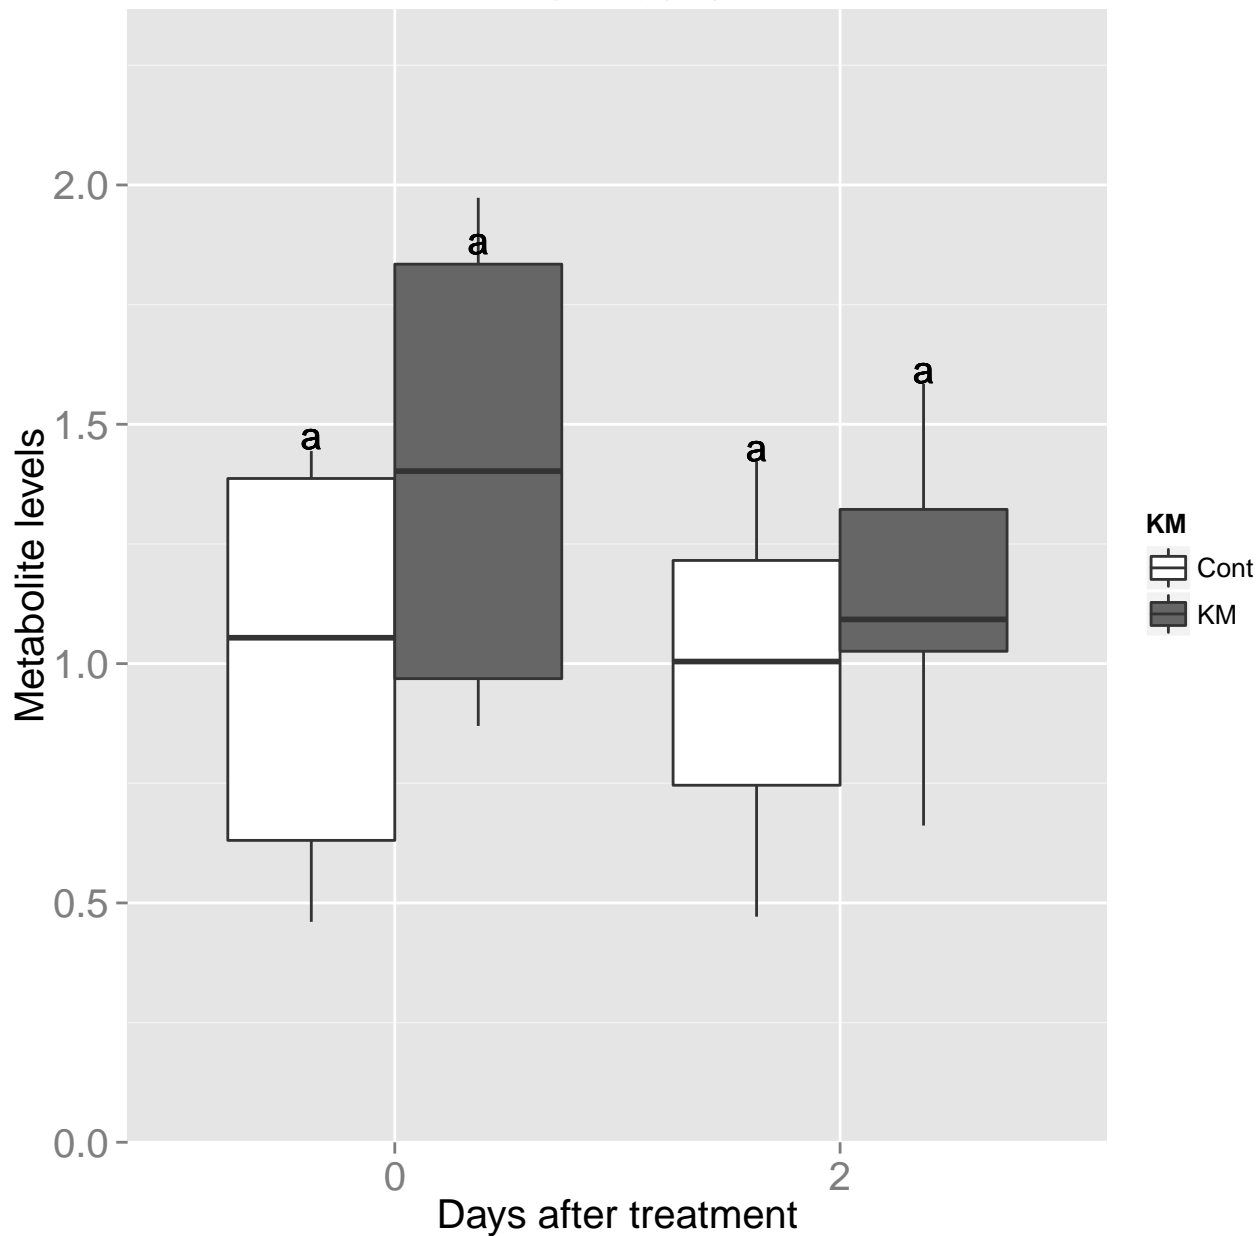

# Serine

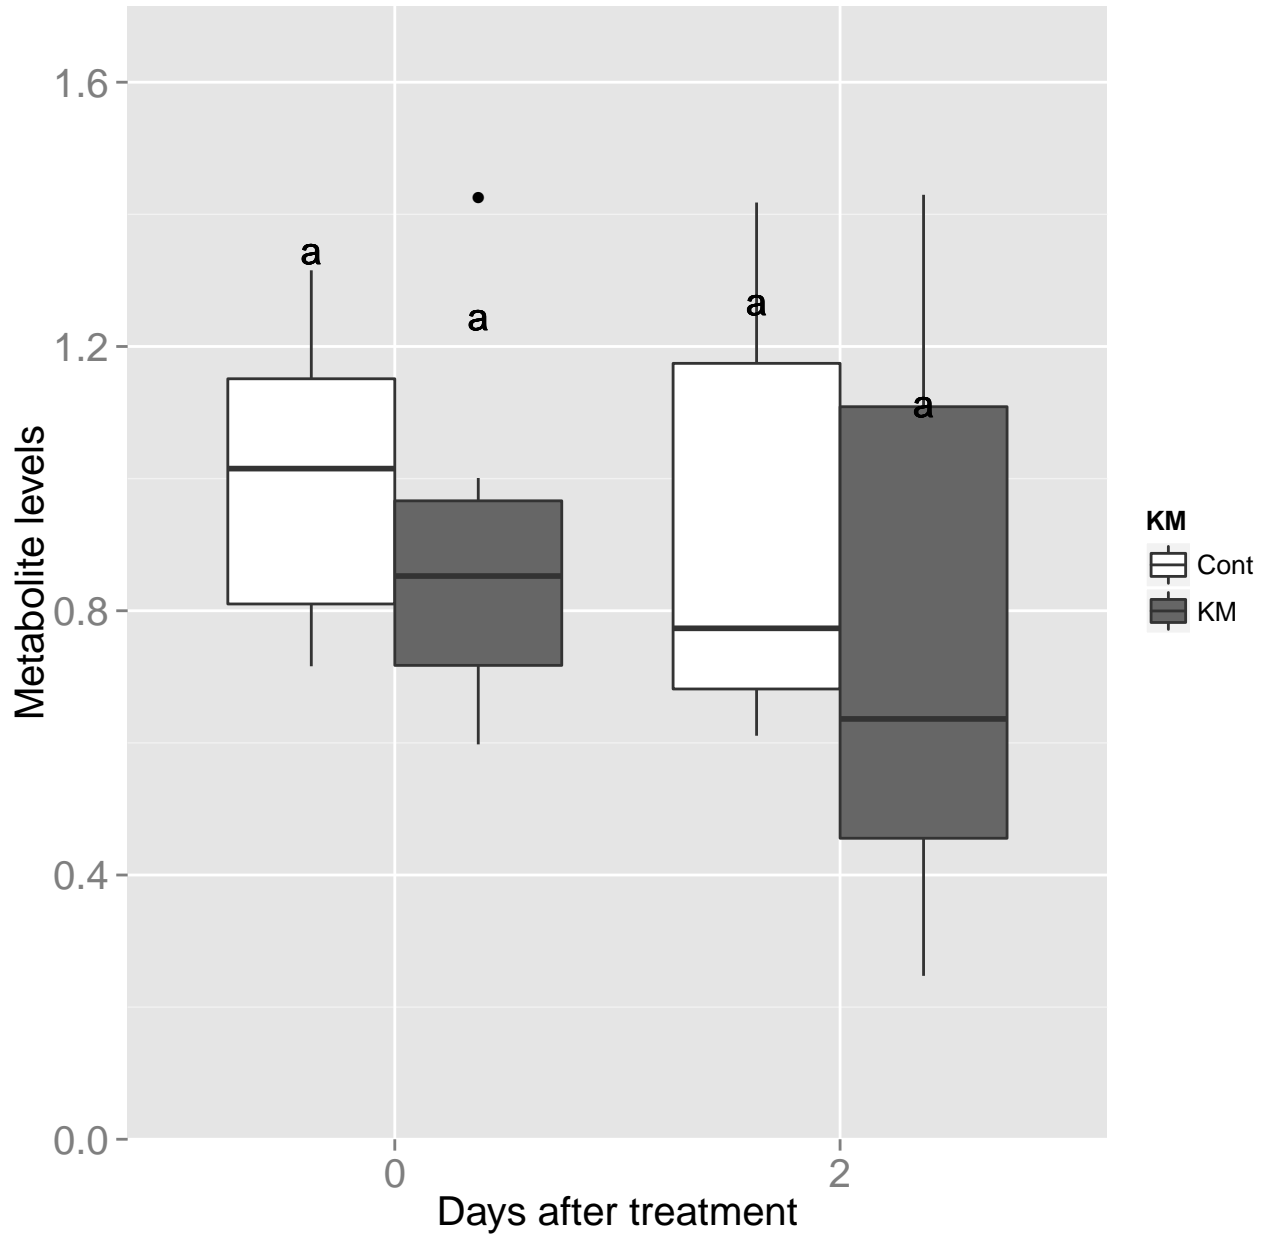

# Succinate

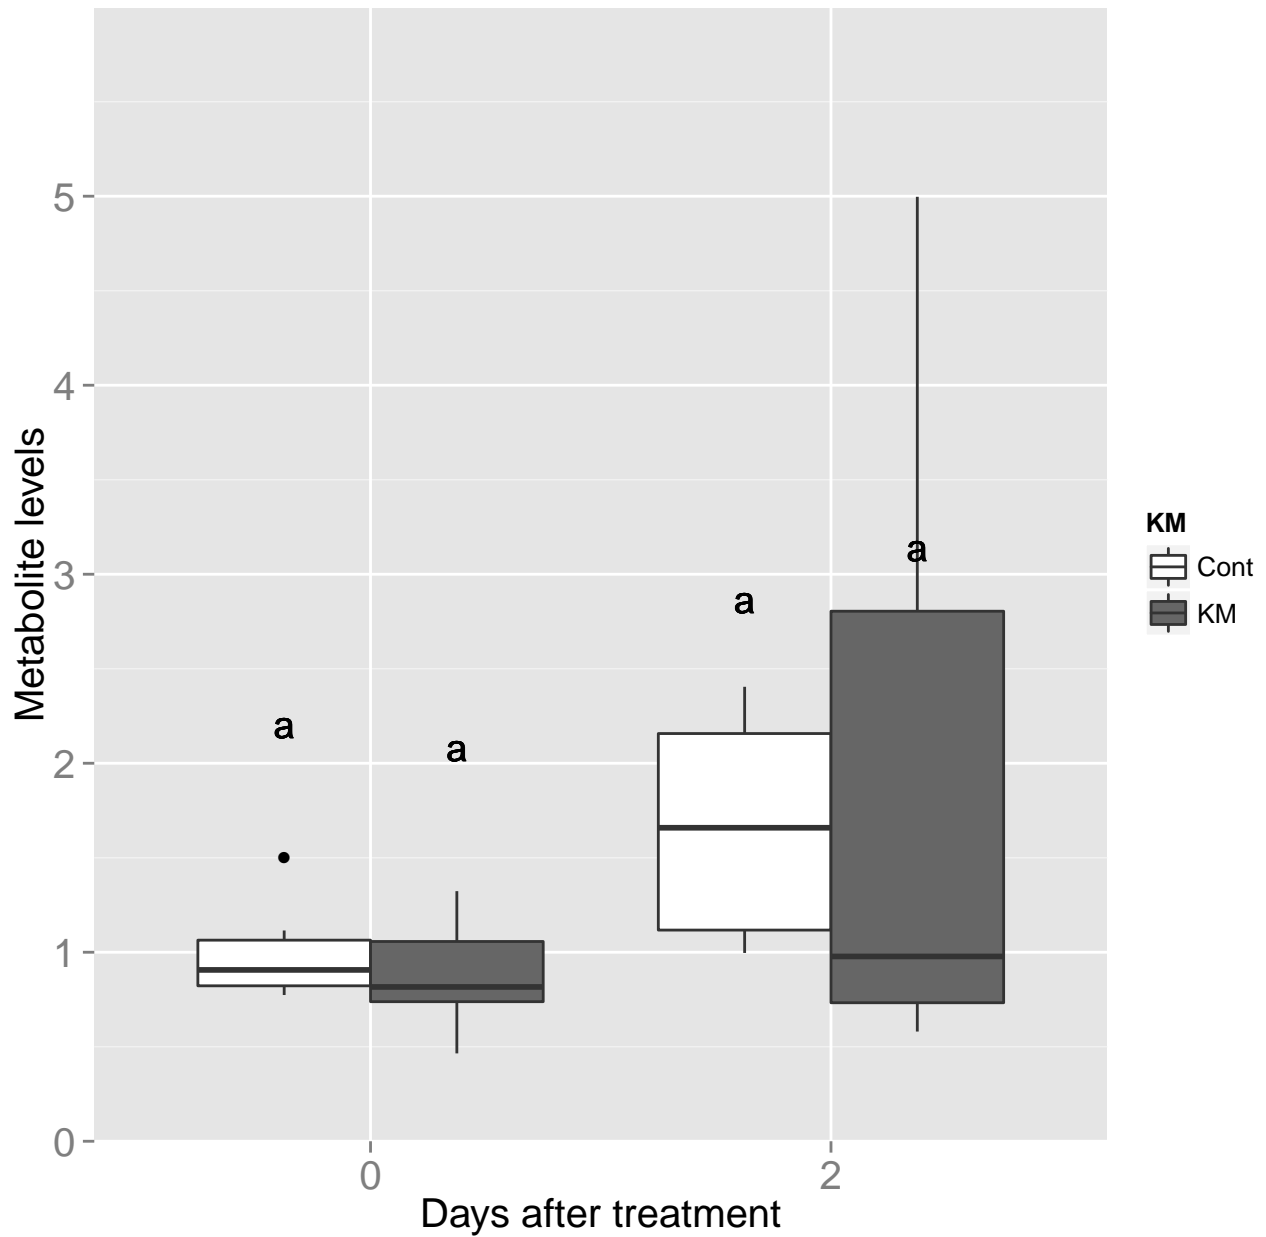



# Threonine

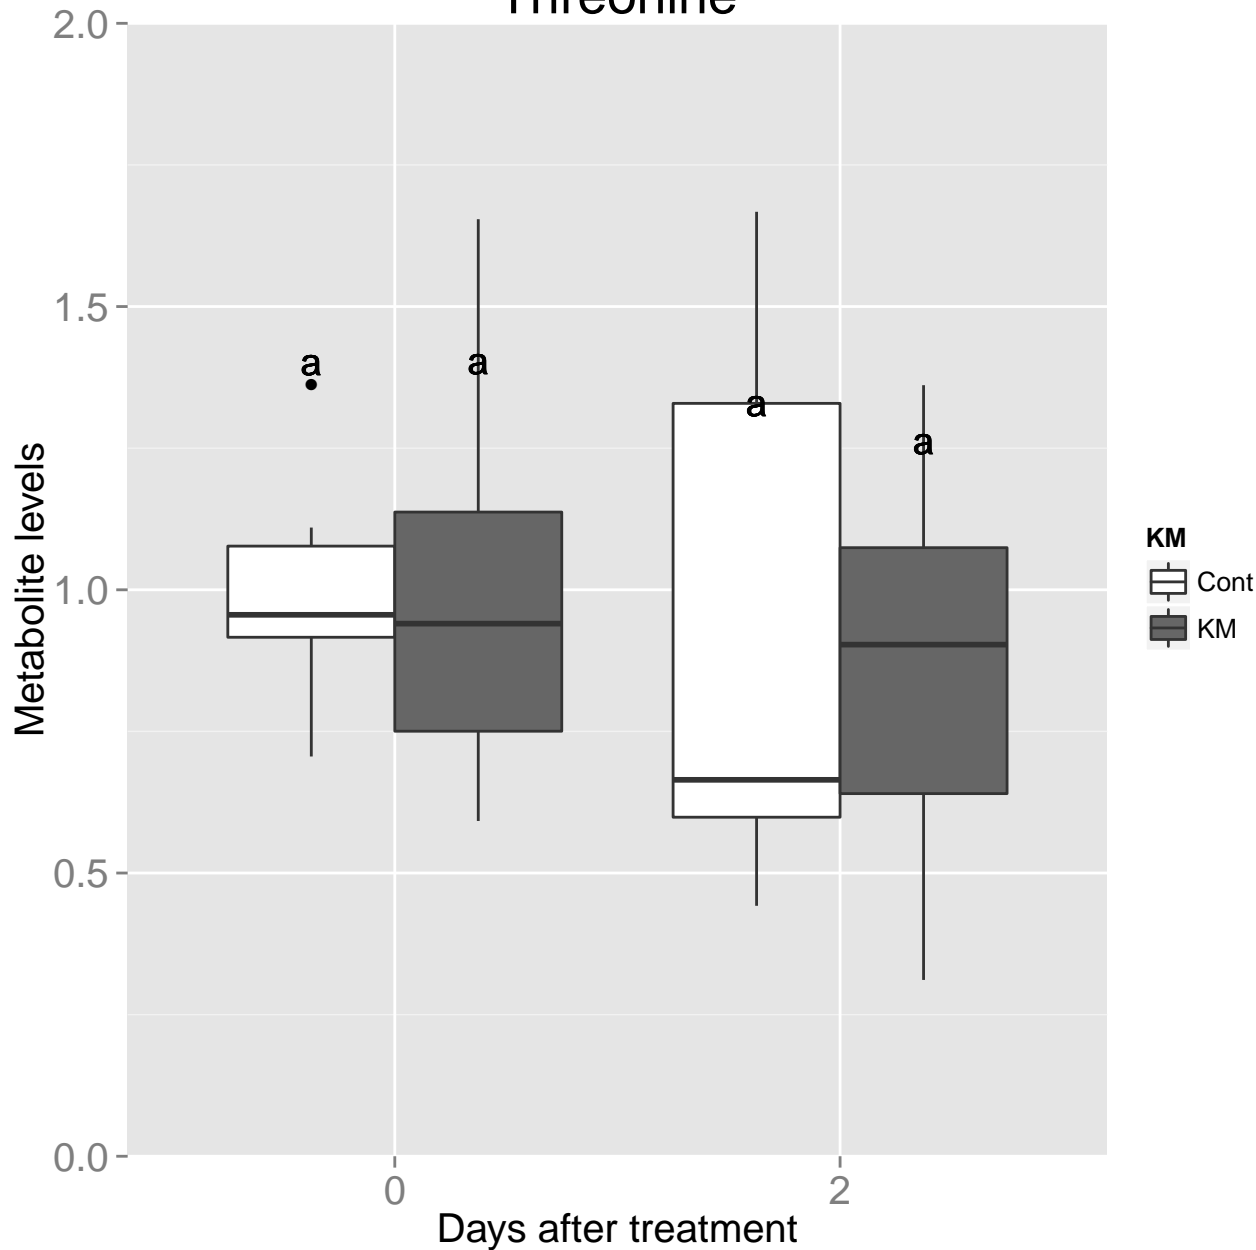

# beta.alanine

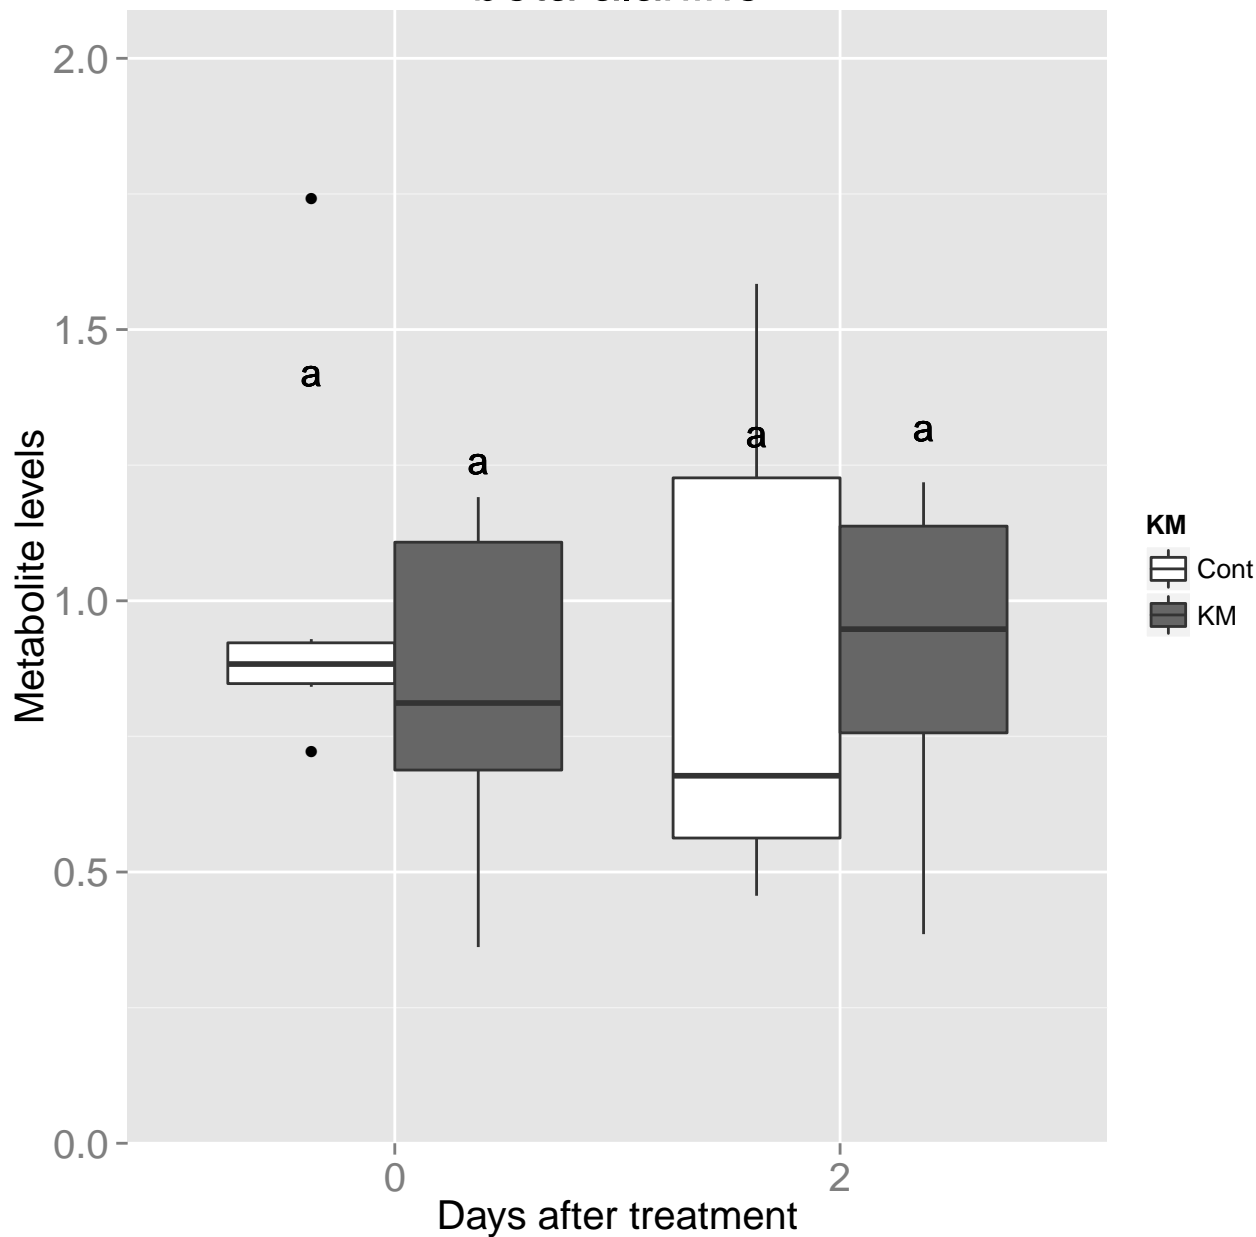

# Erythritol

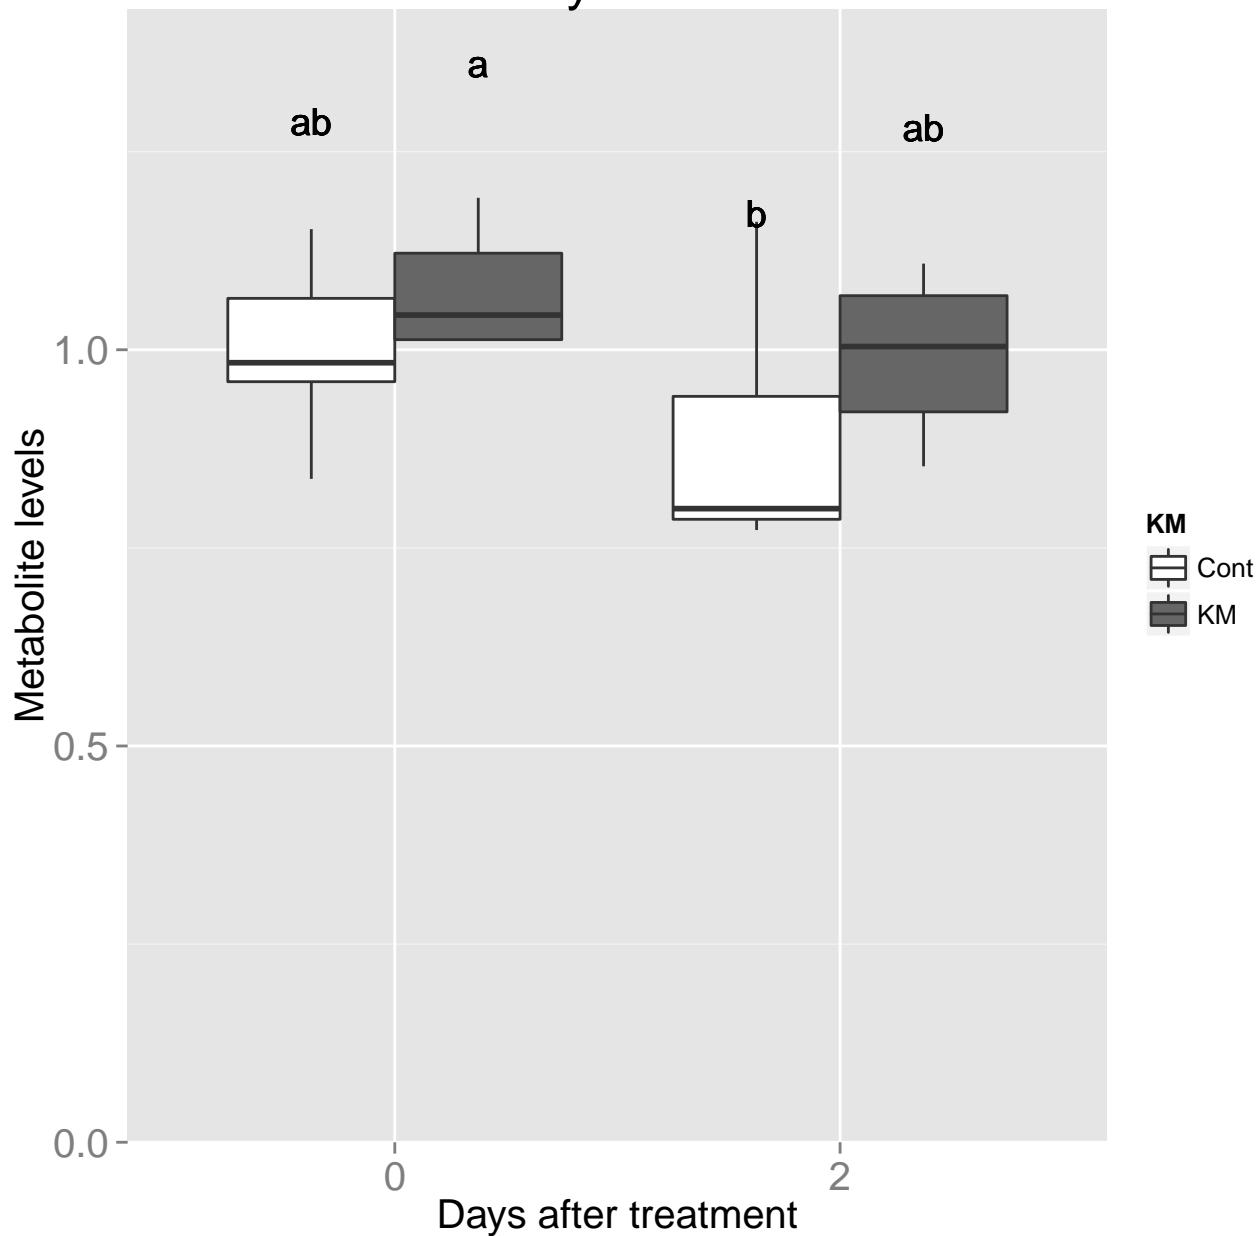

# Malate

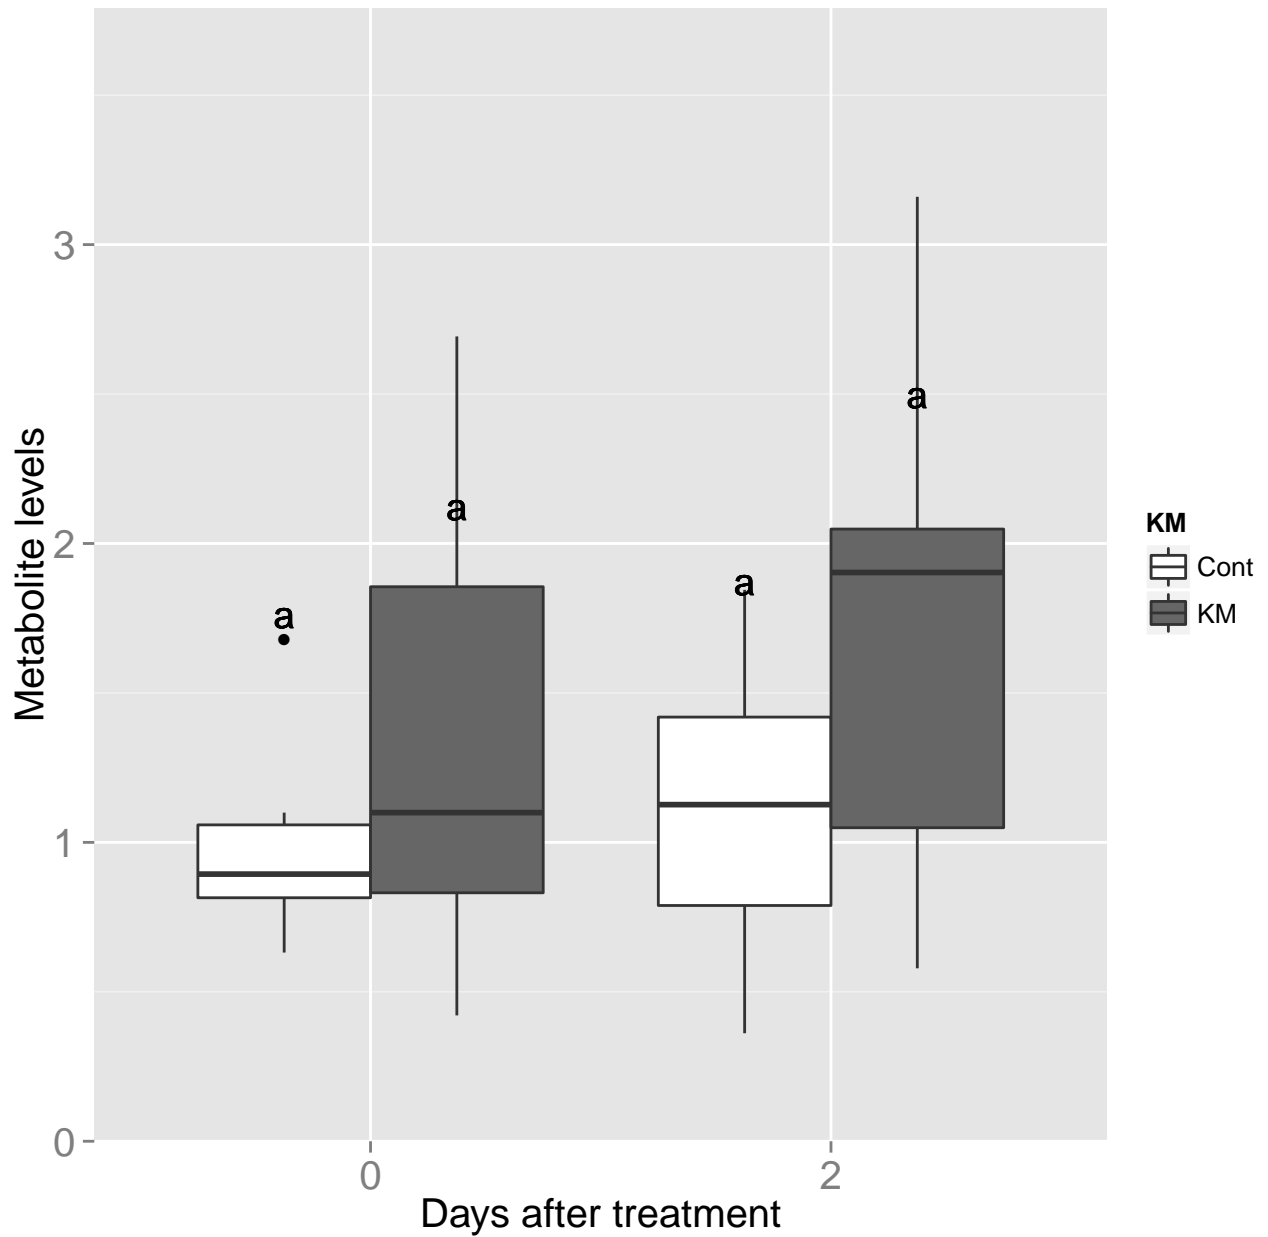

# Erythronate

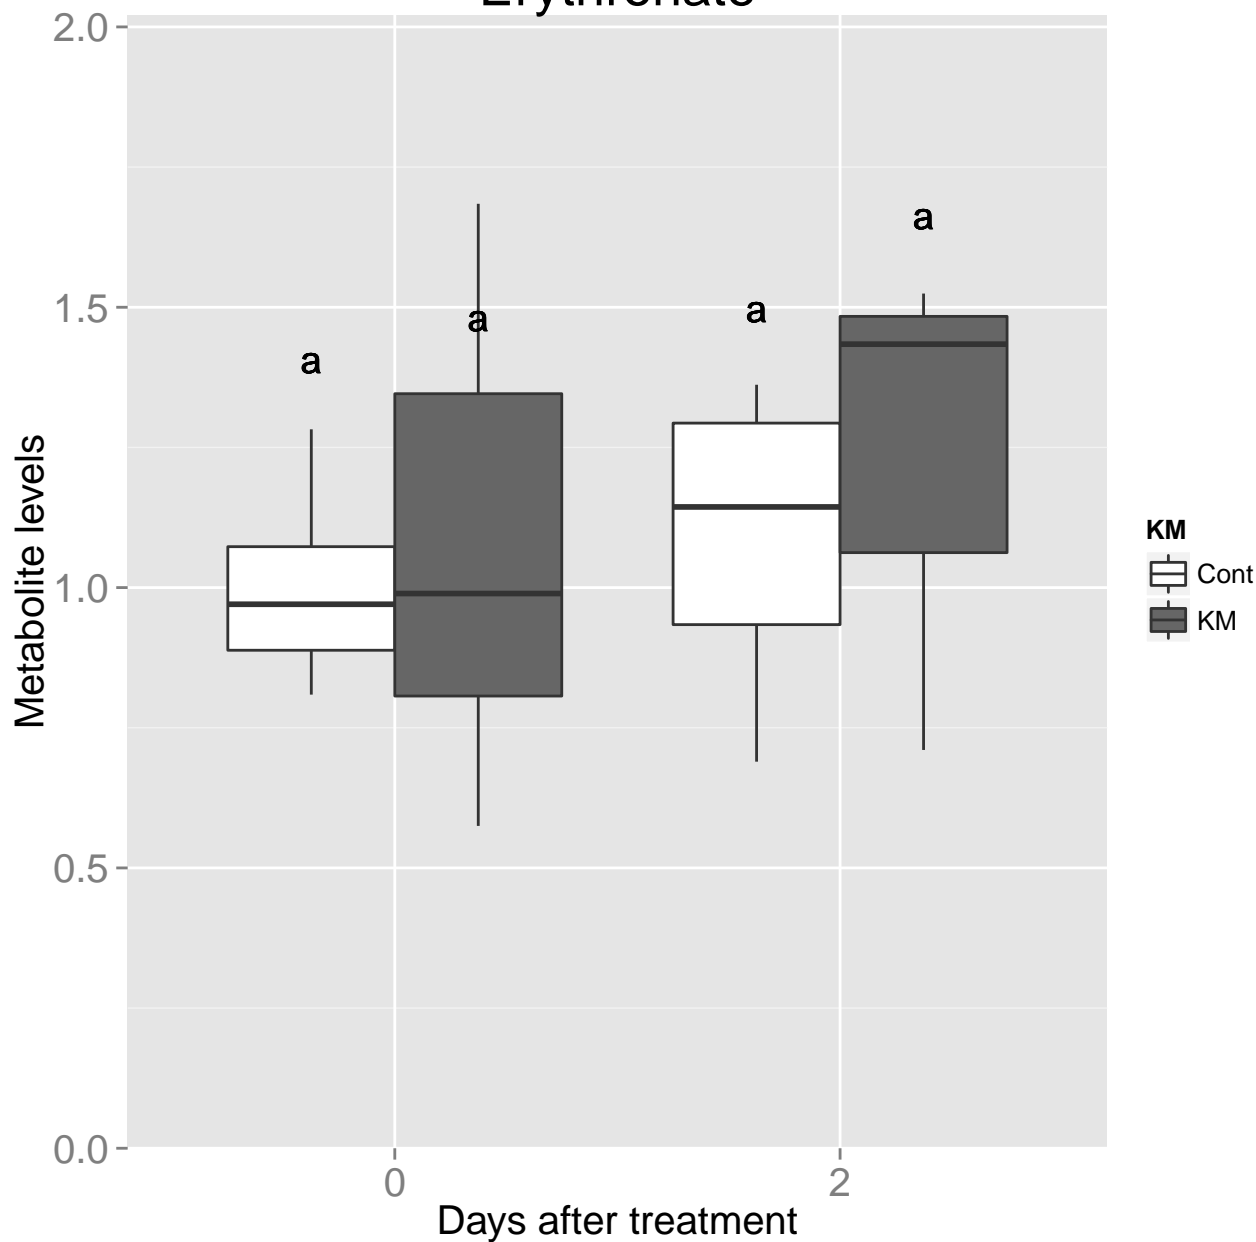

# GABA

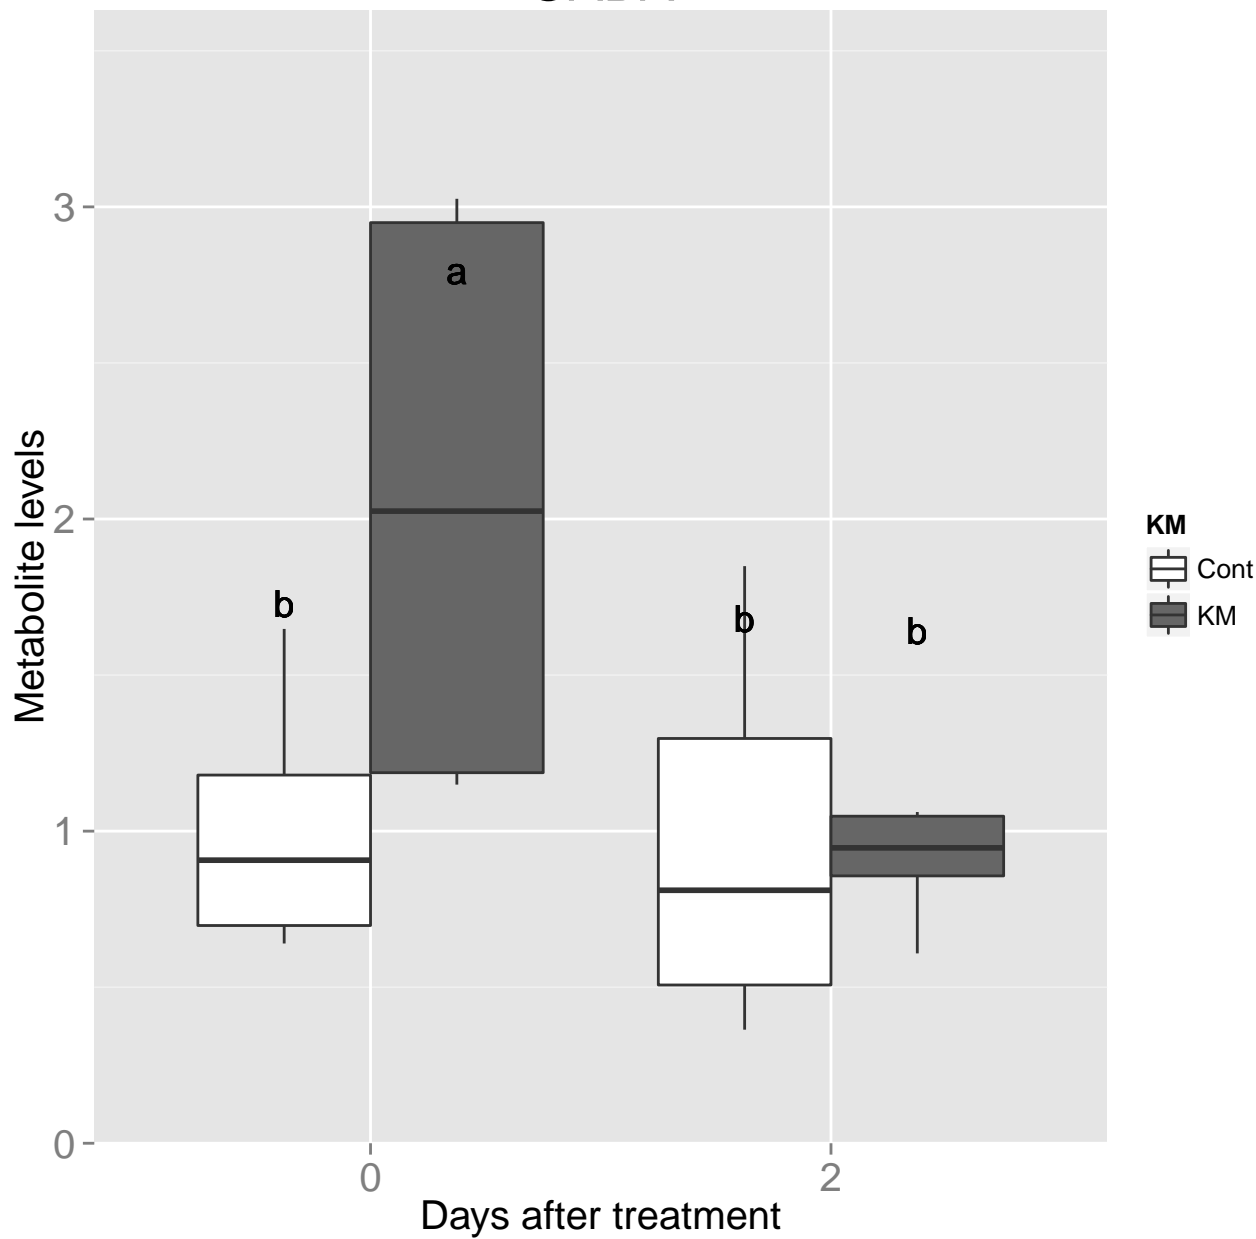

# Aspartate

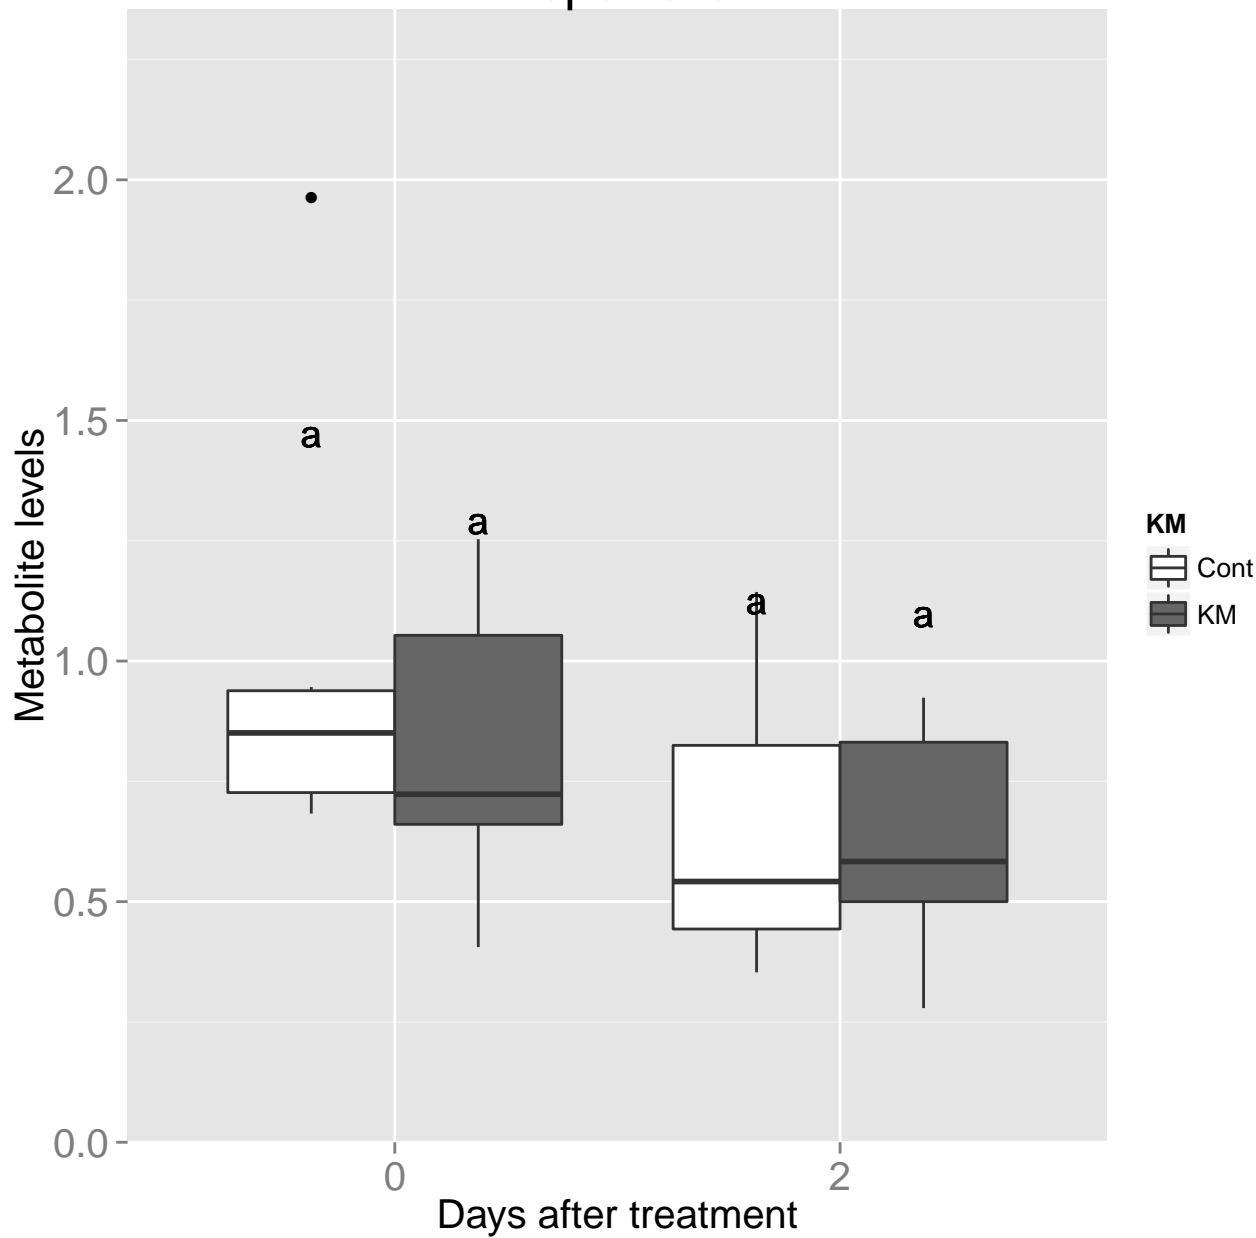

# Methionine

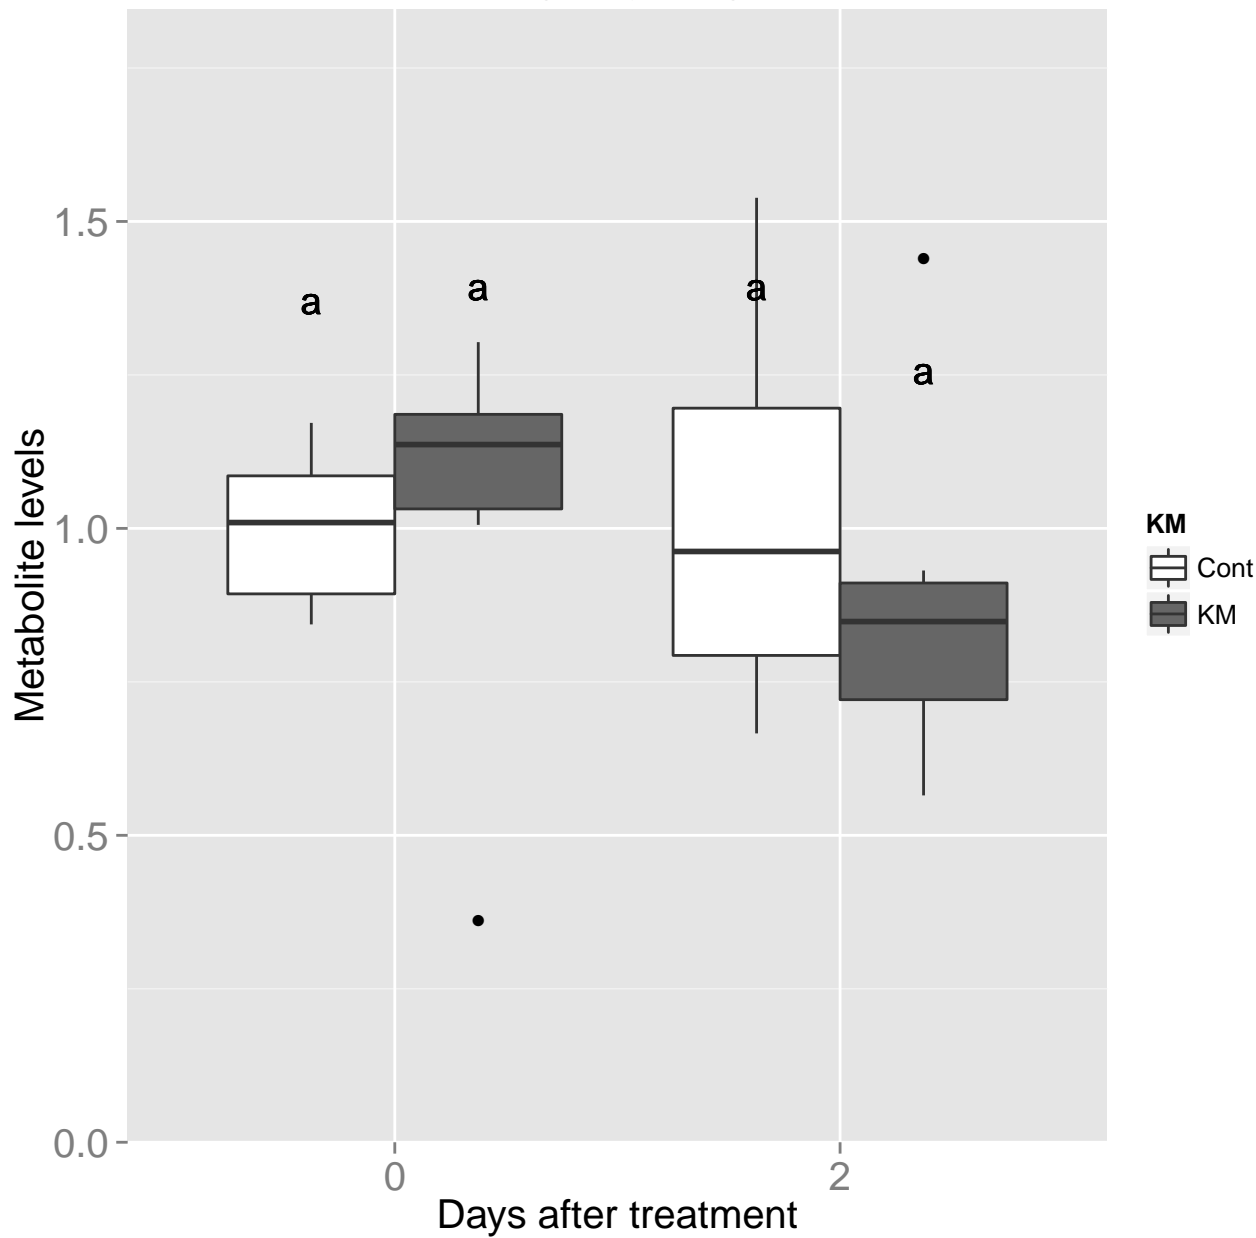



# Xylose

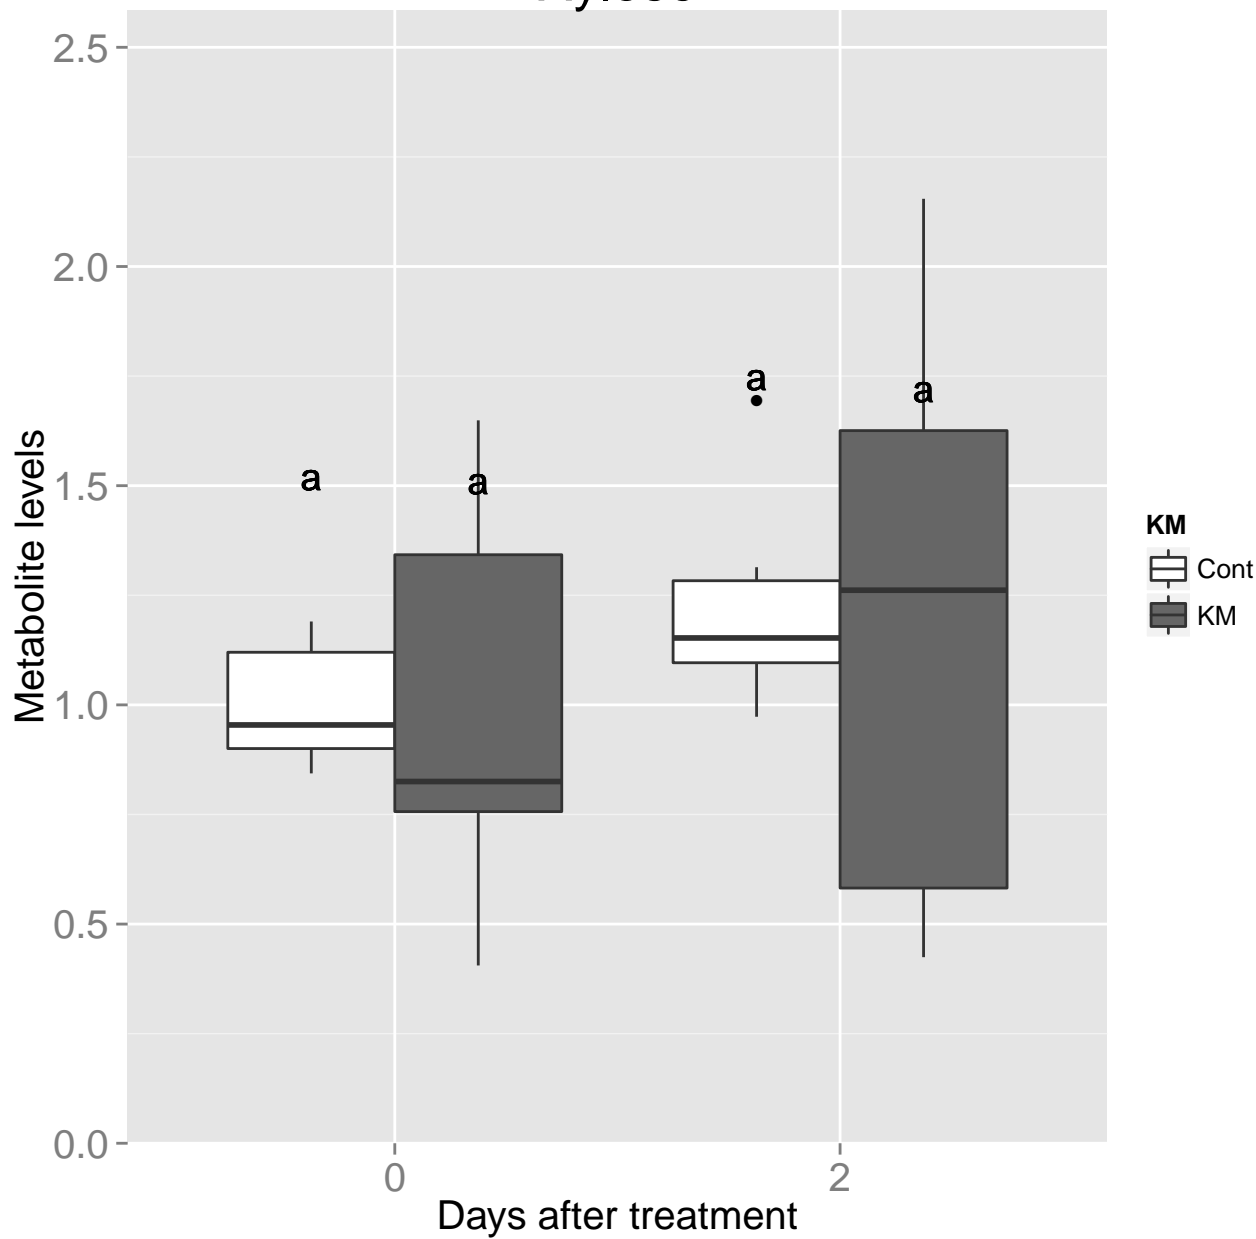

# Pyroglutamate

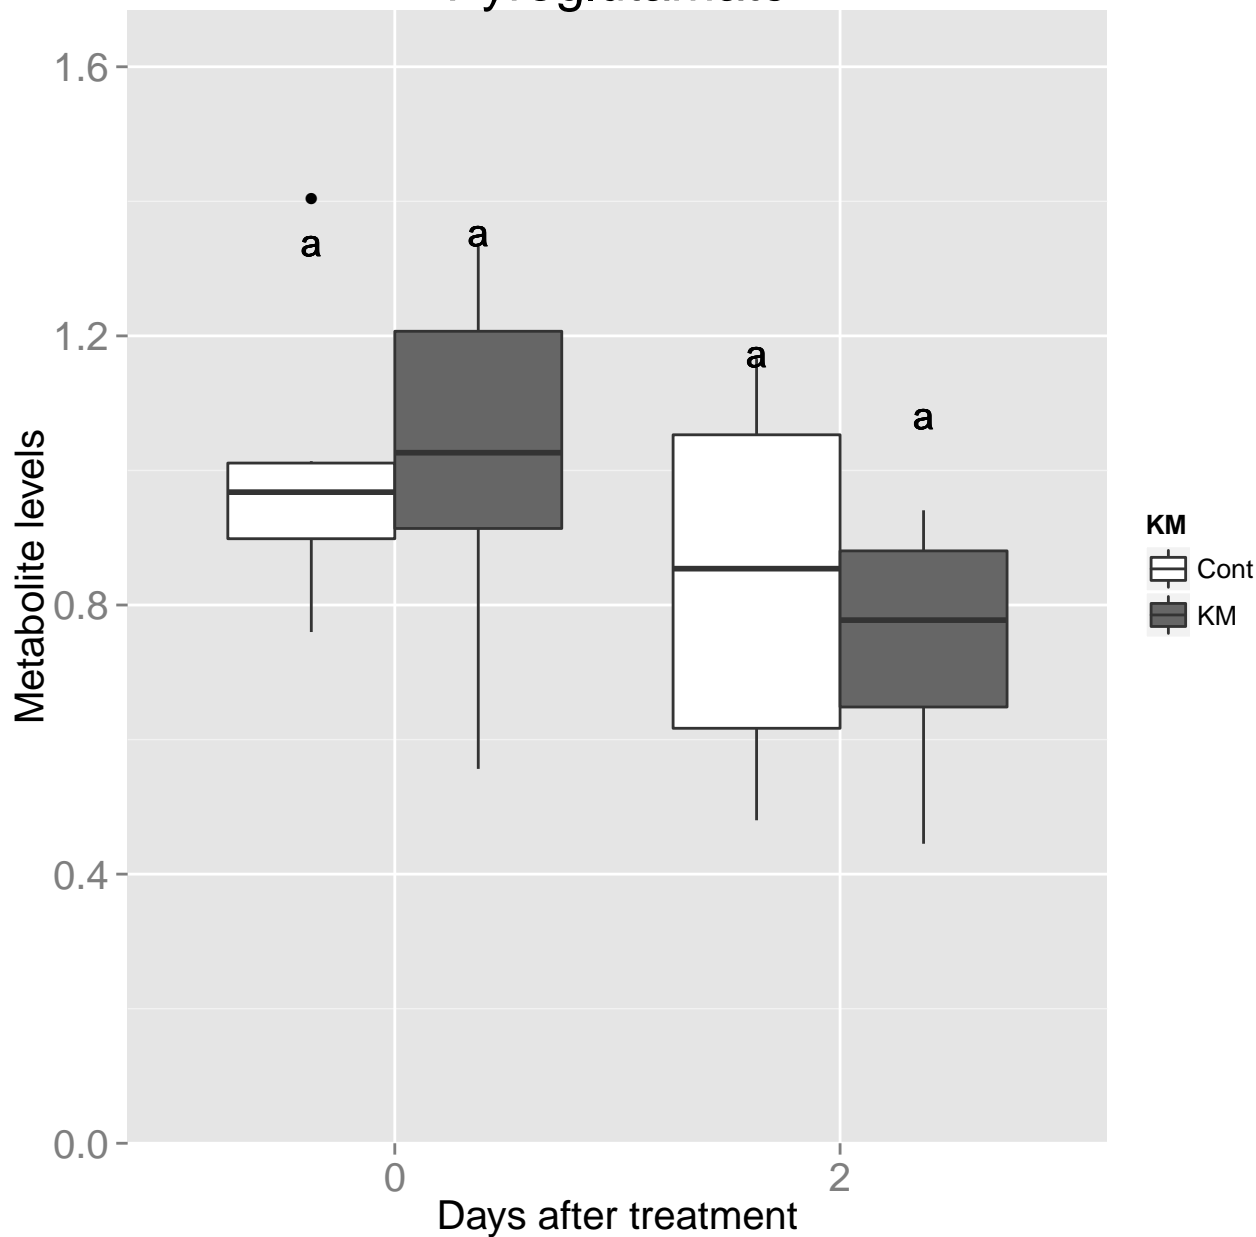

# Glutamate

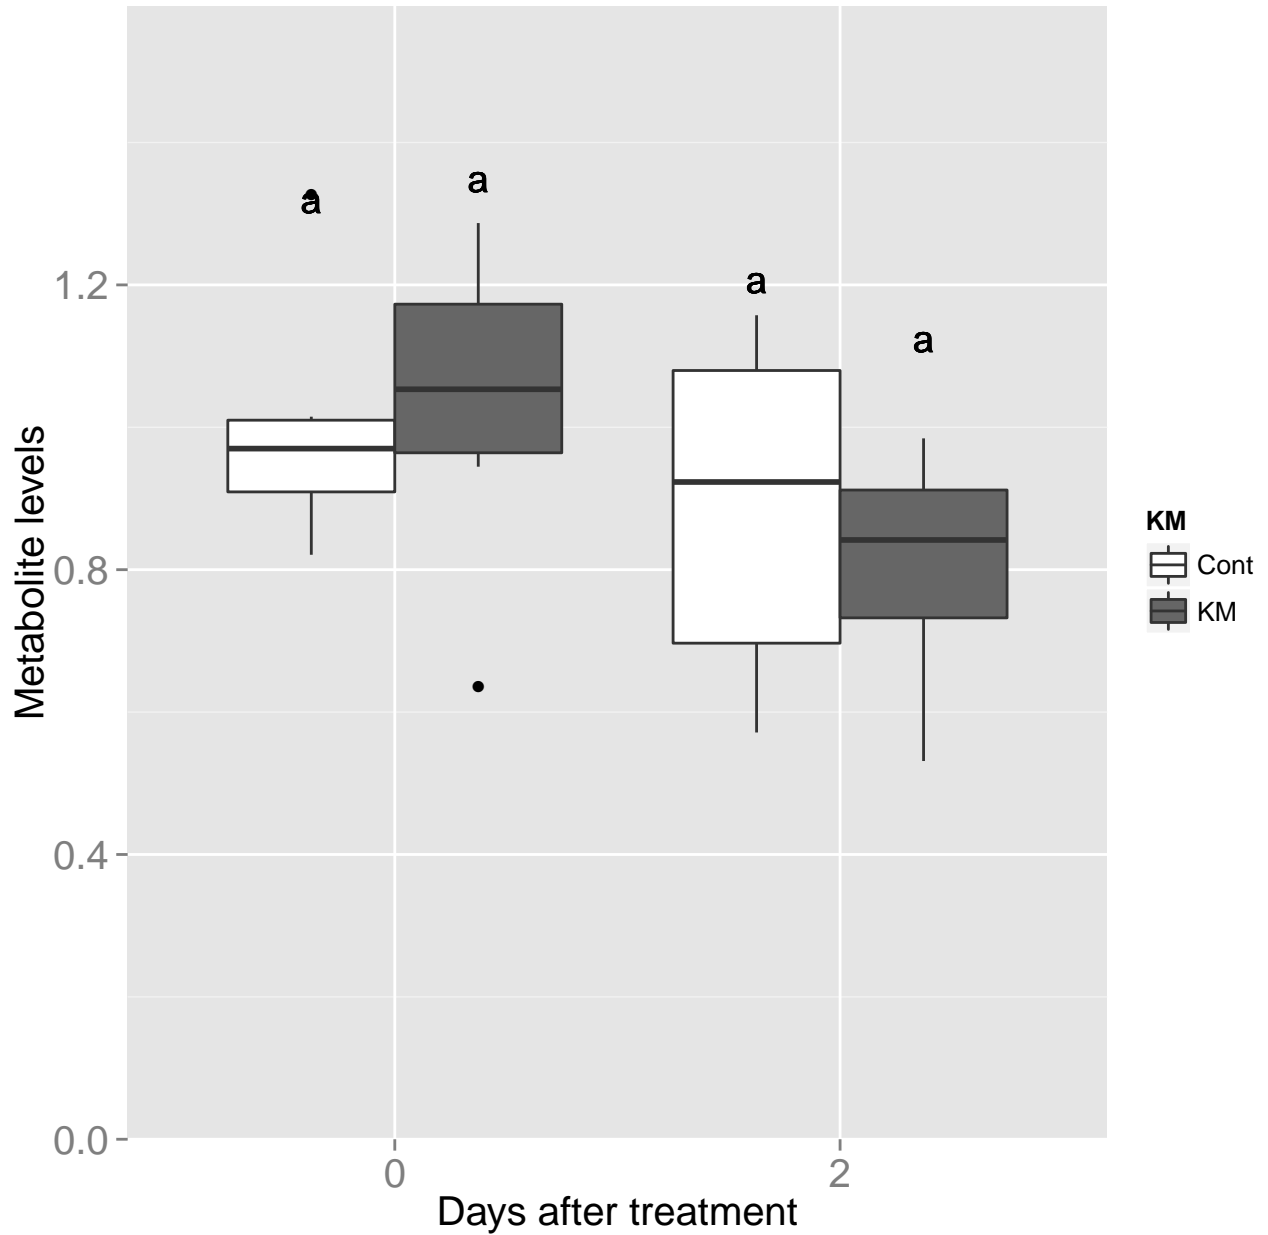

# Rhamnose

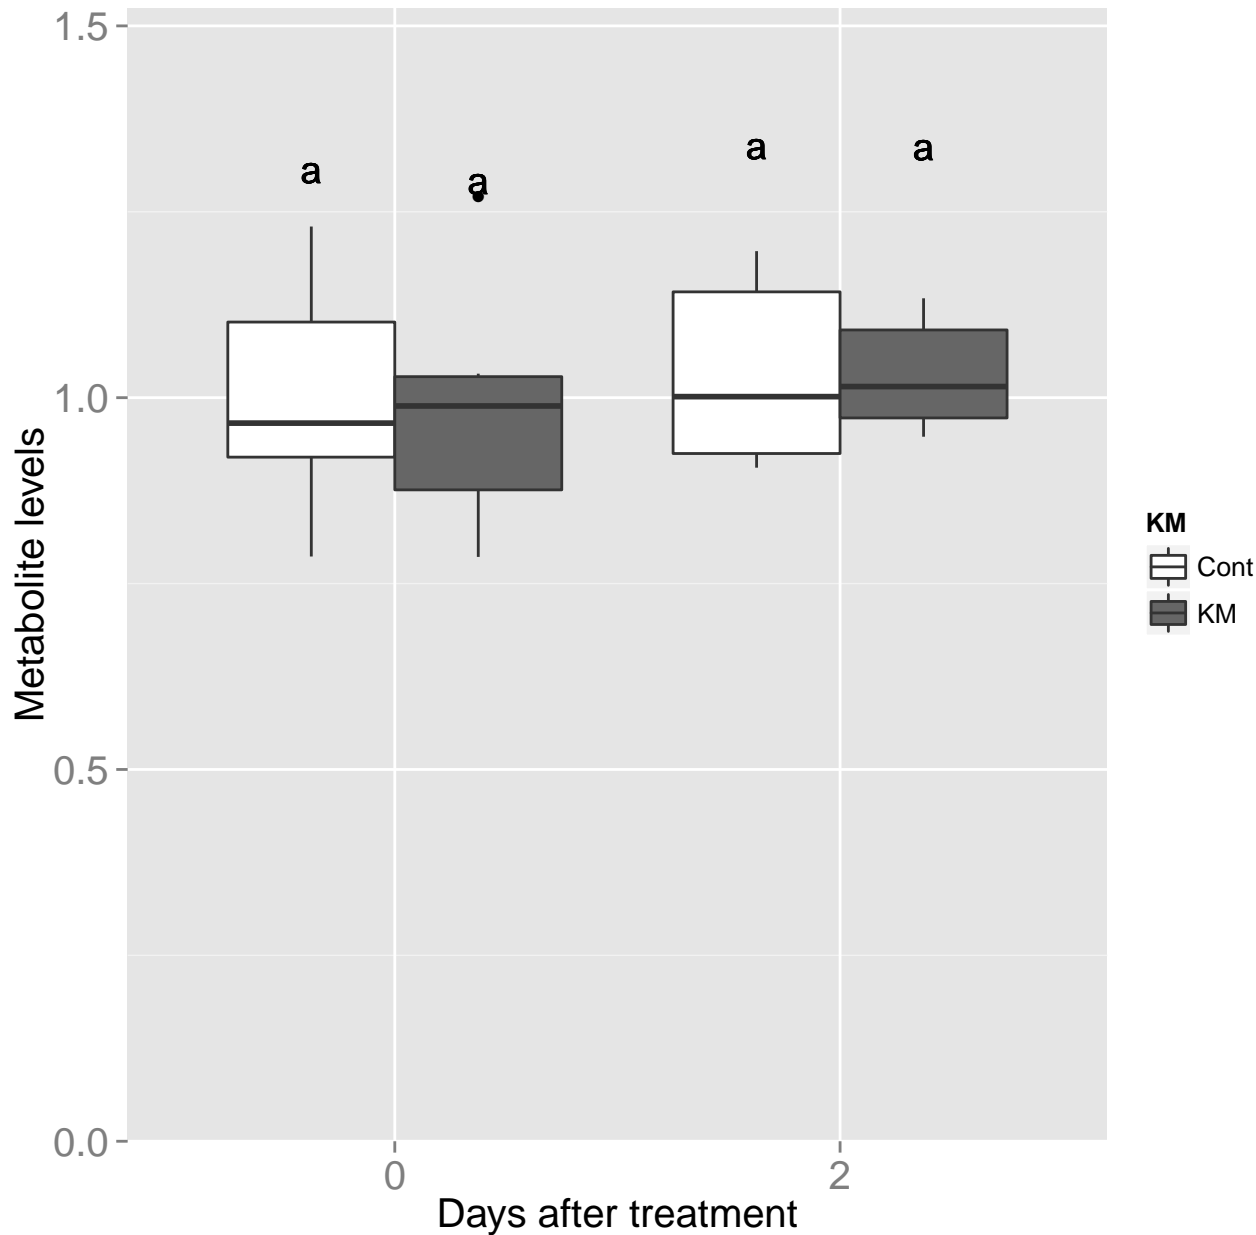

# Putrescine

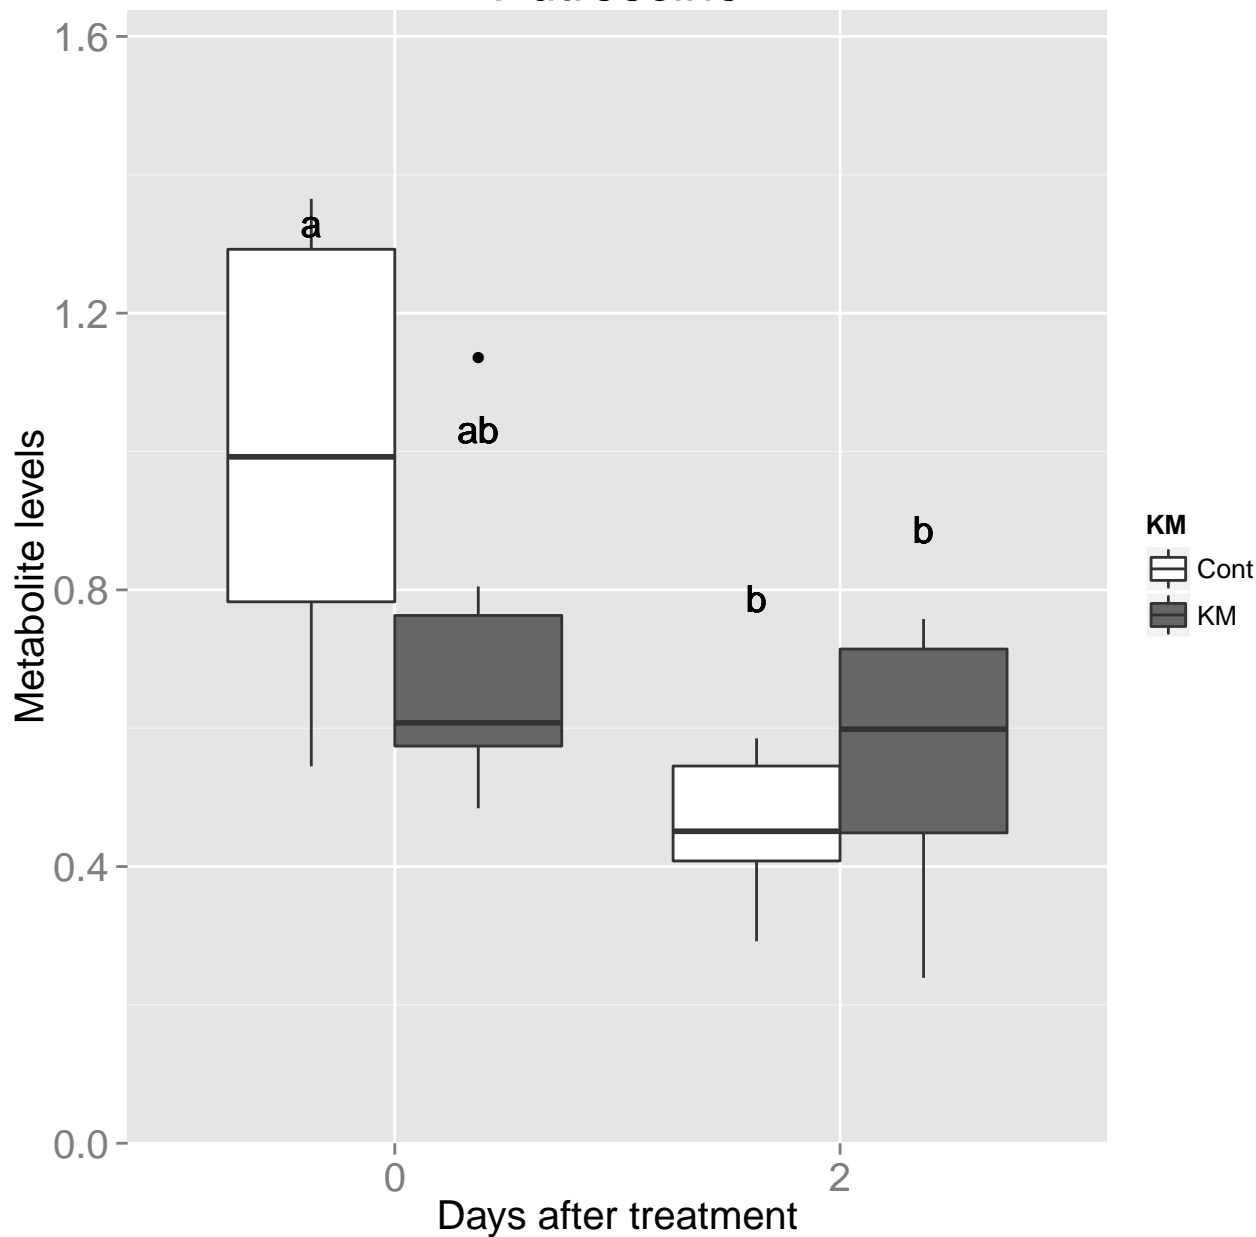

# Fucose

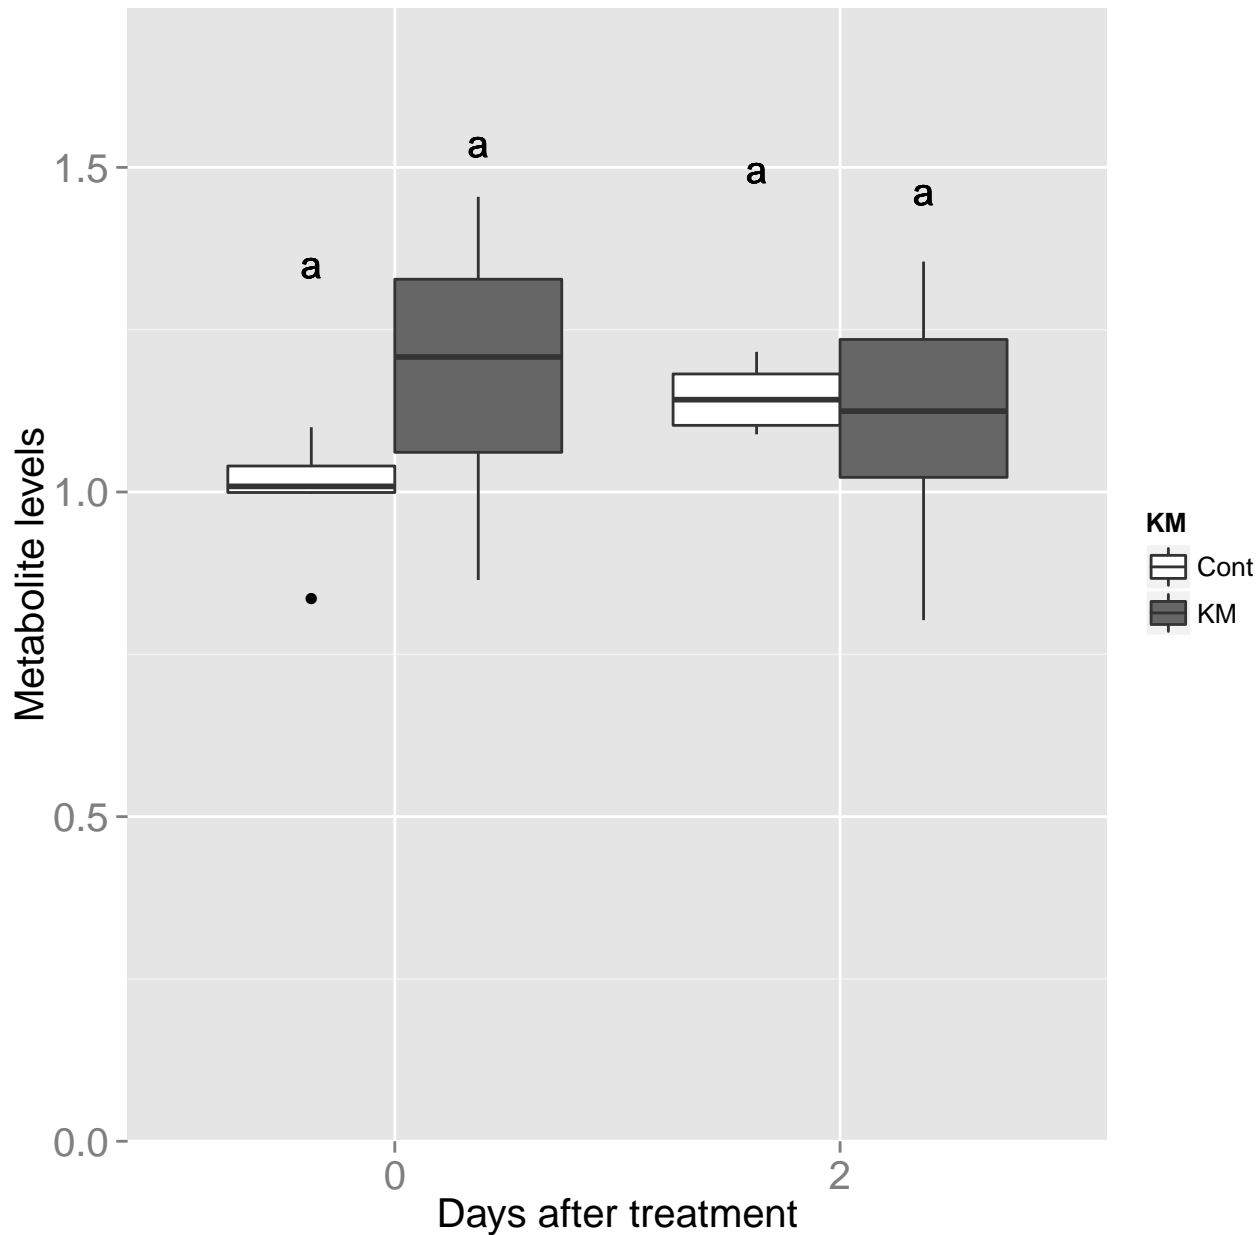

# X2OG

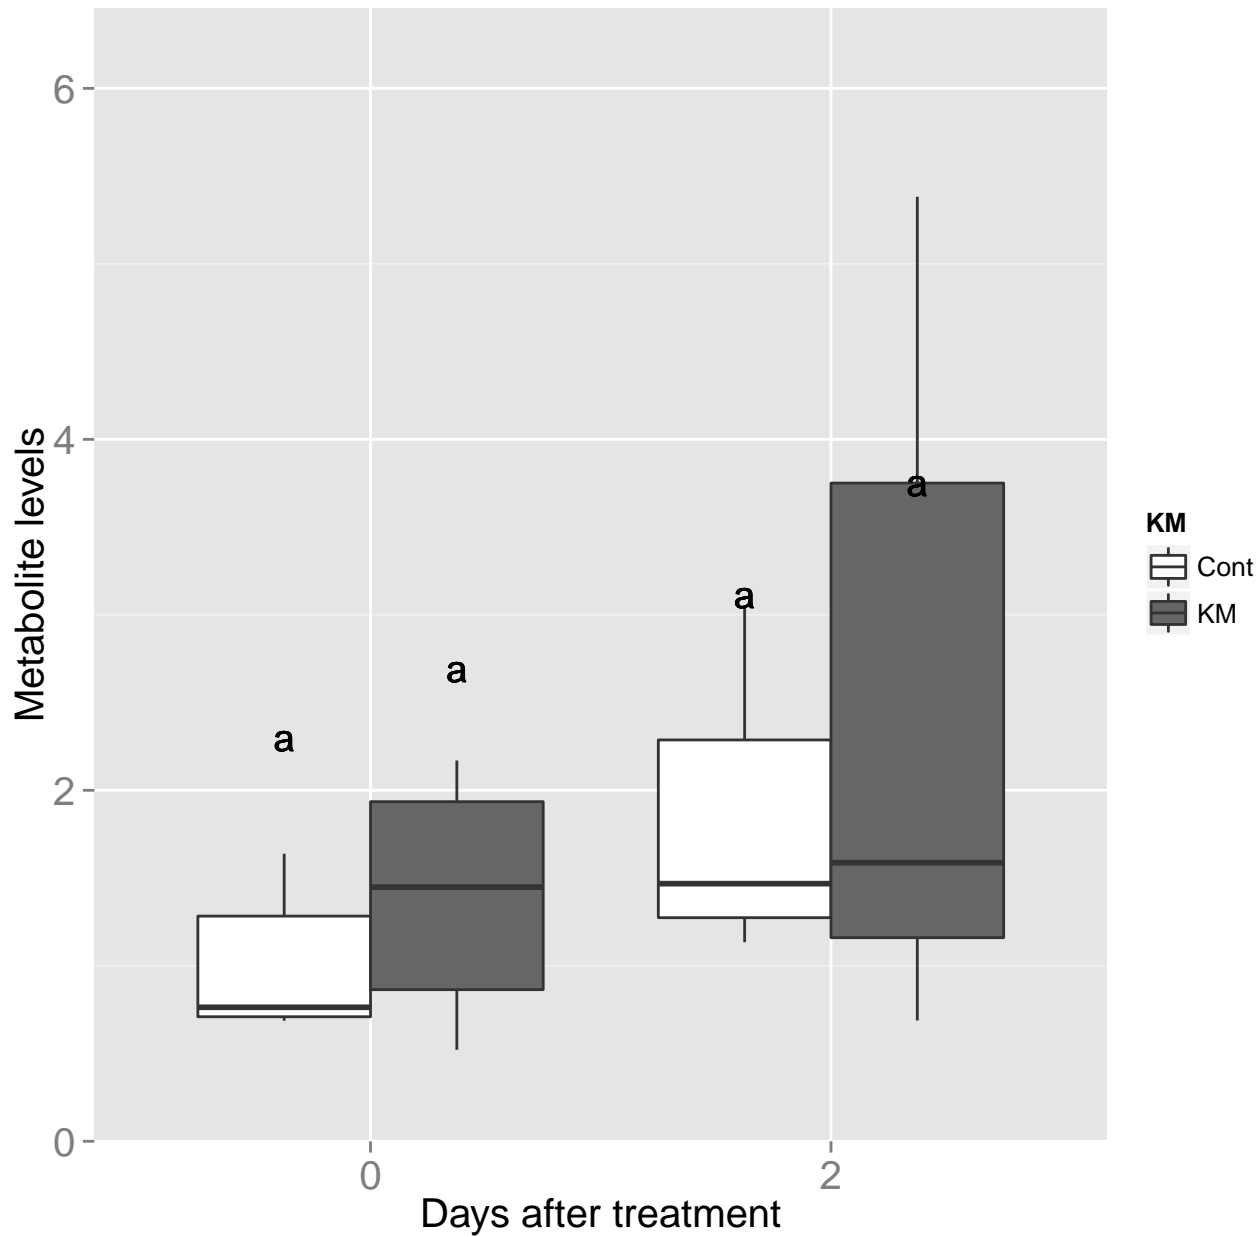

# Phenylalanine

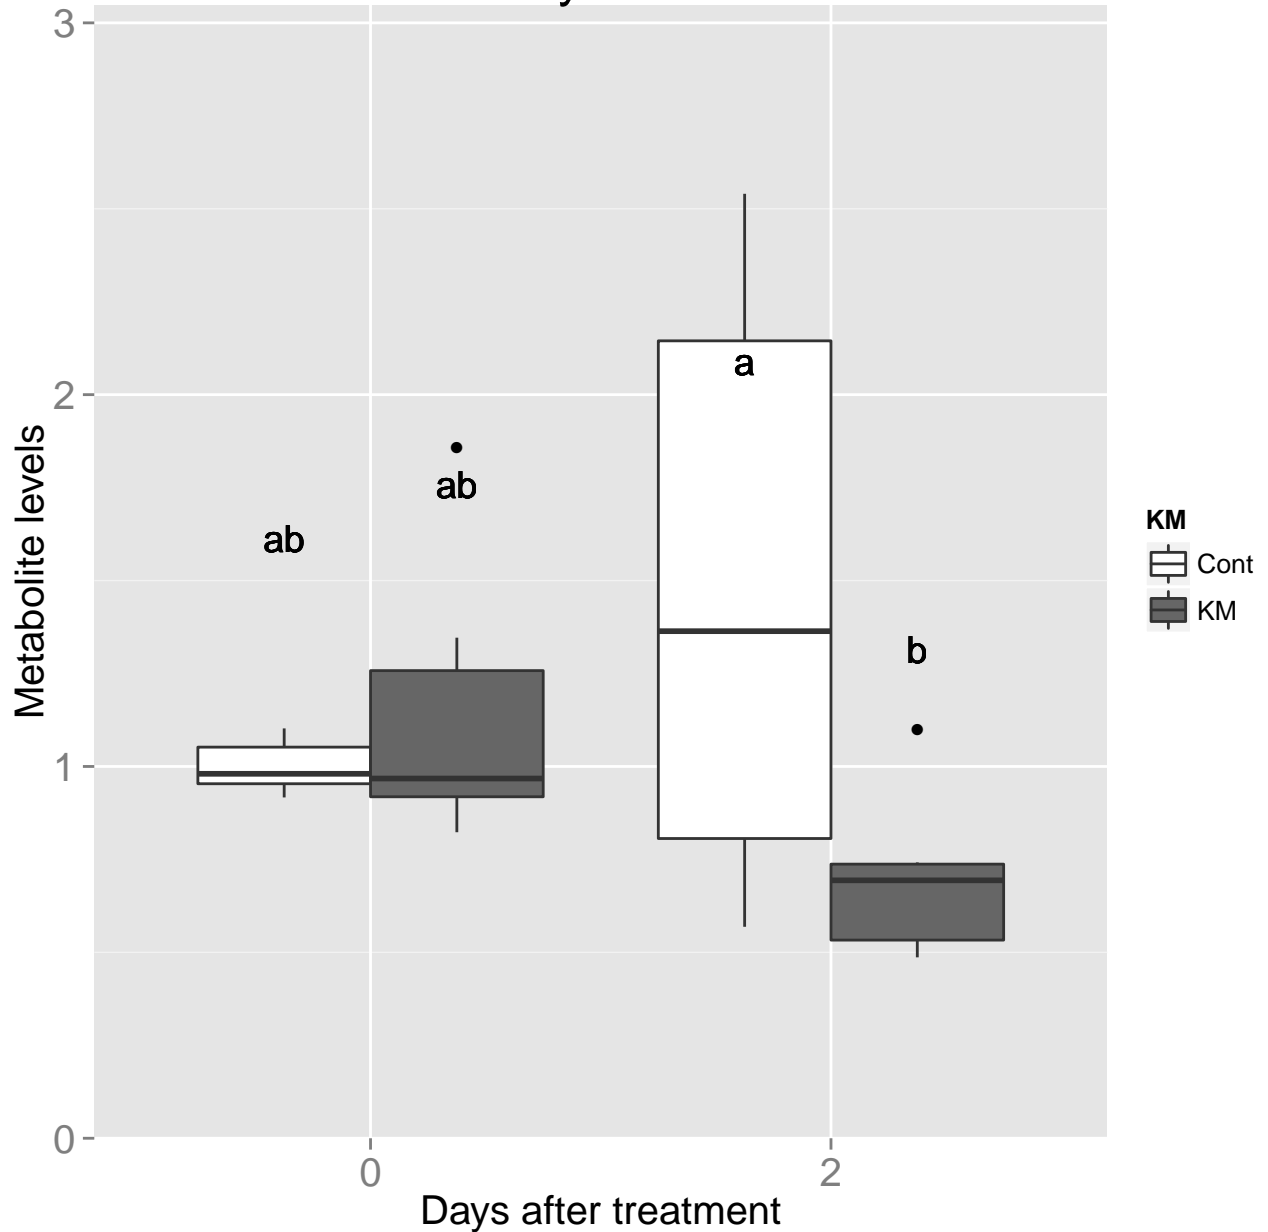



# Asparagine

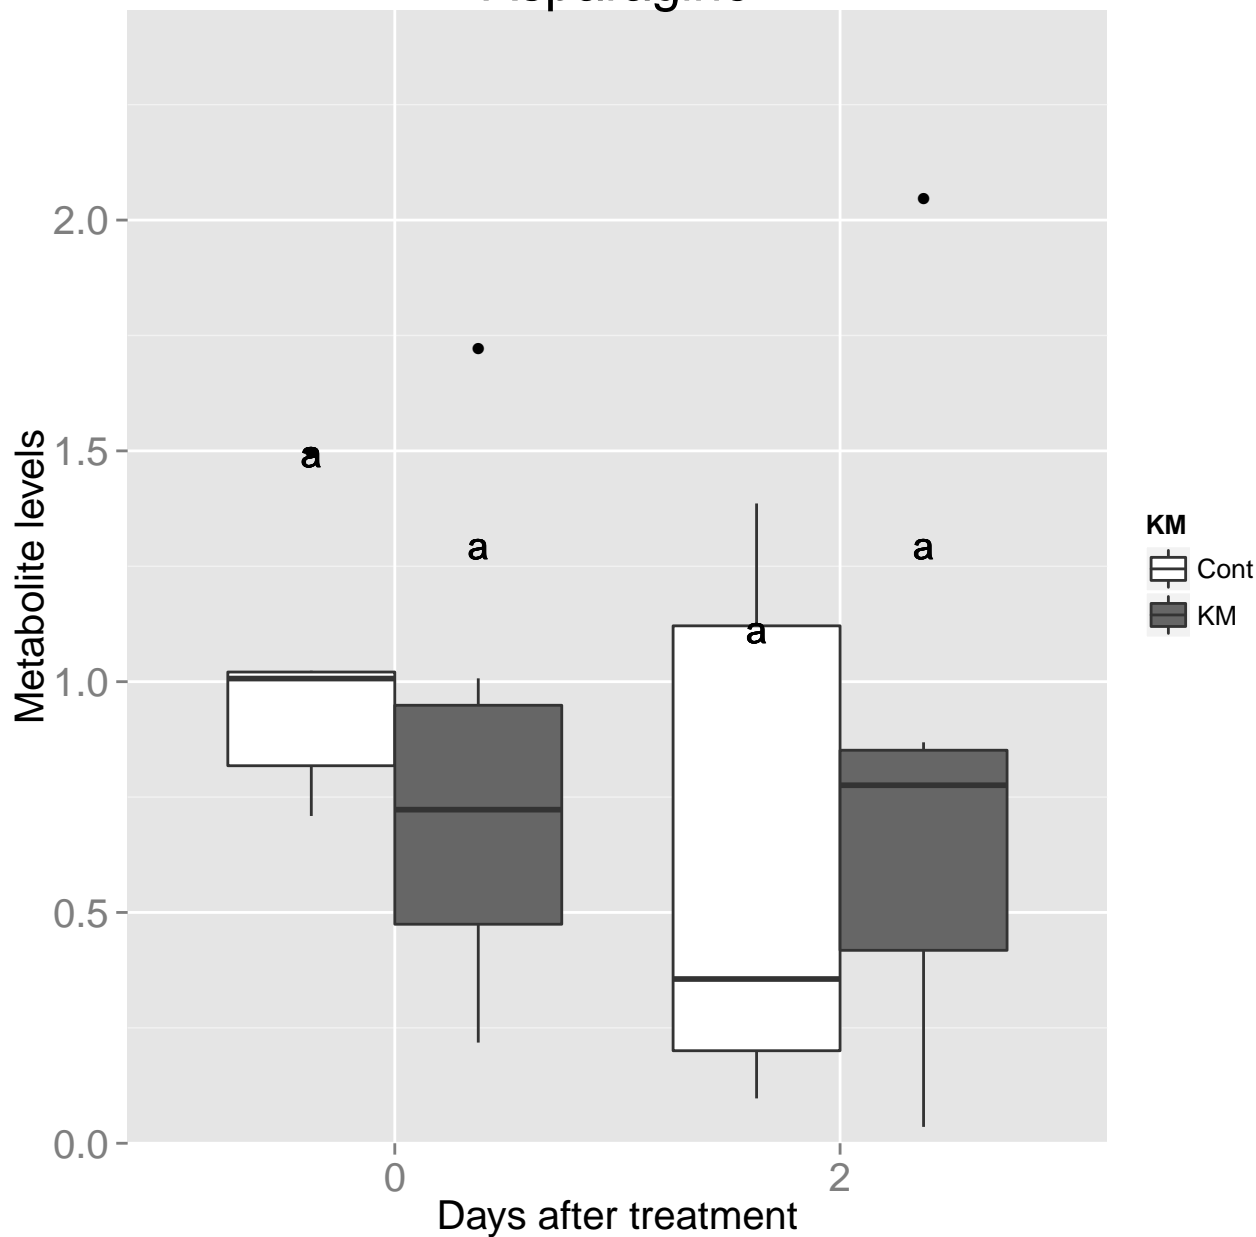

# Glyceraldehyde.3.phosphate

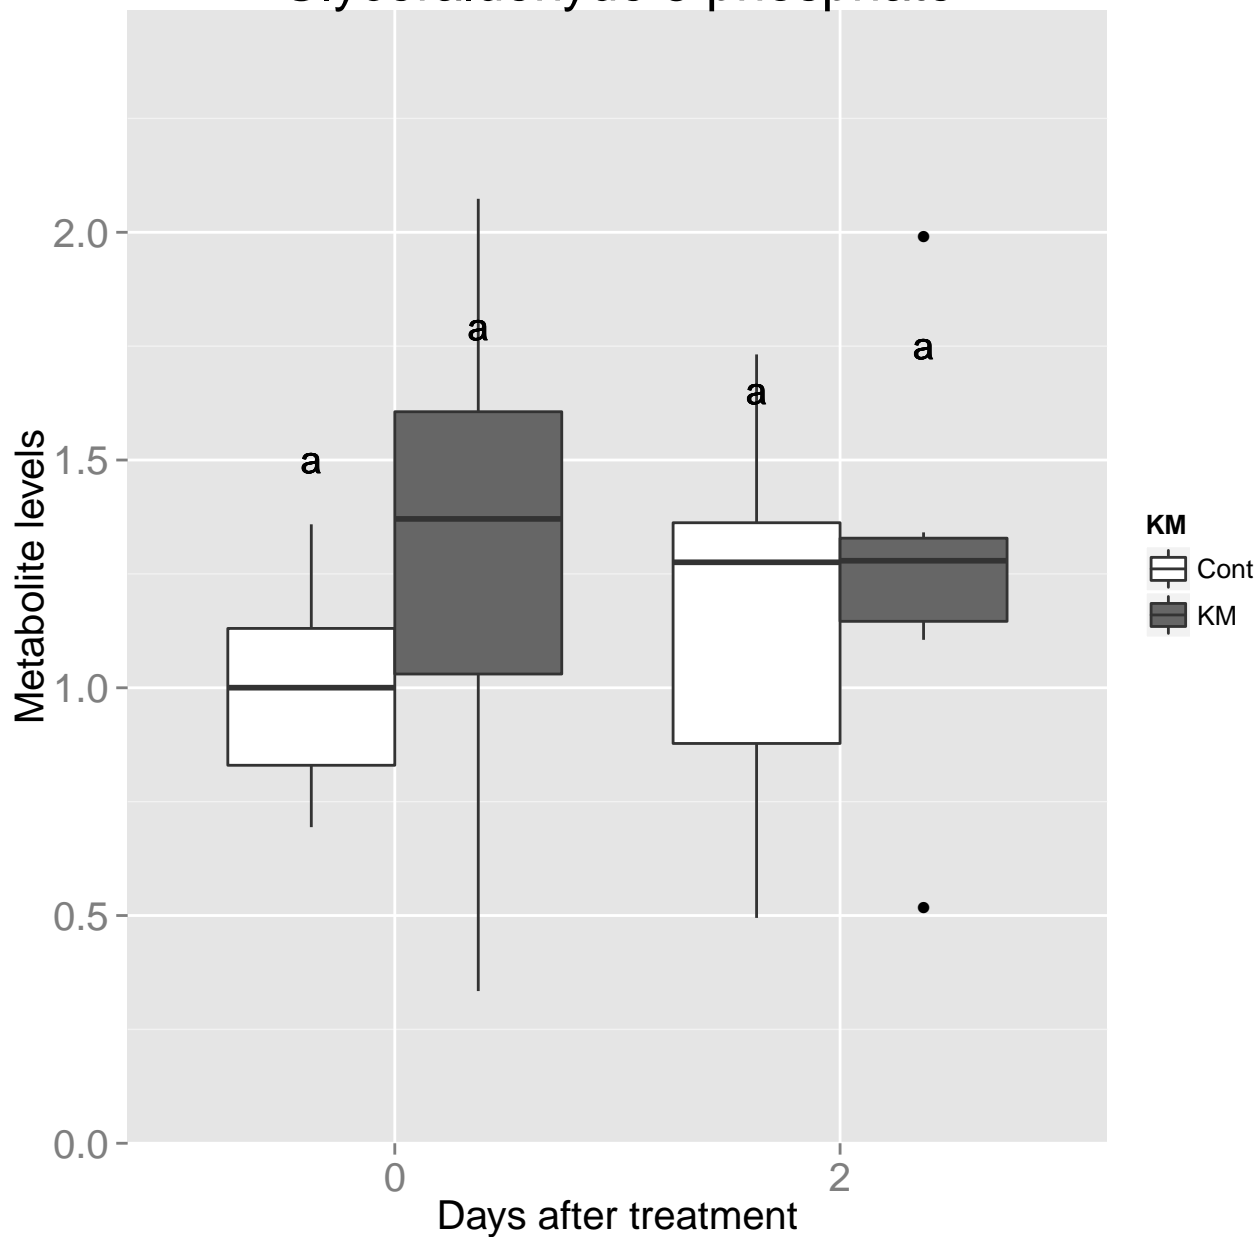

# Fructose

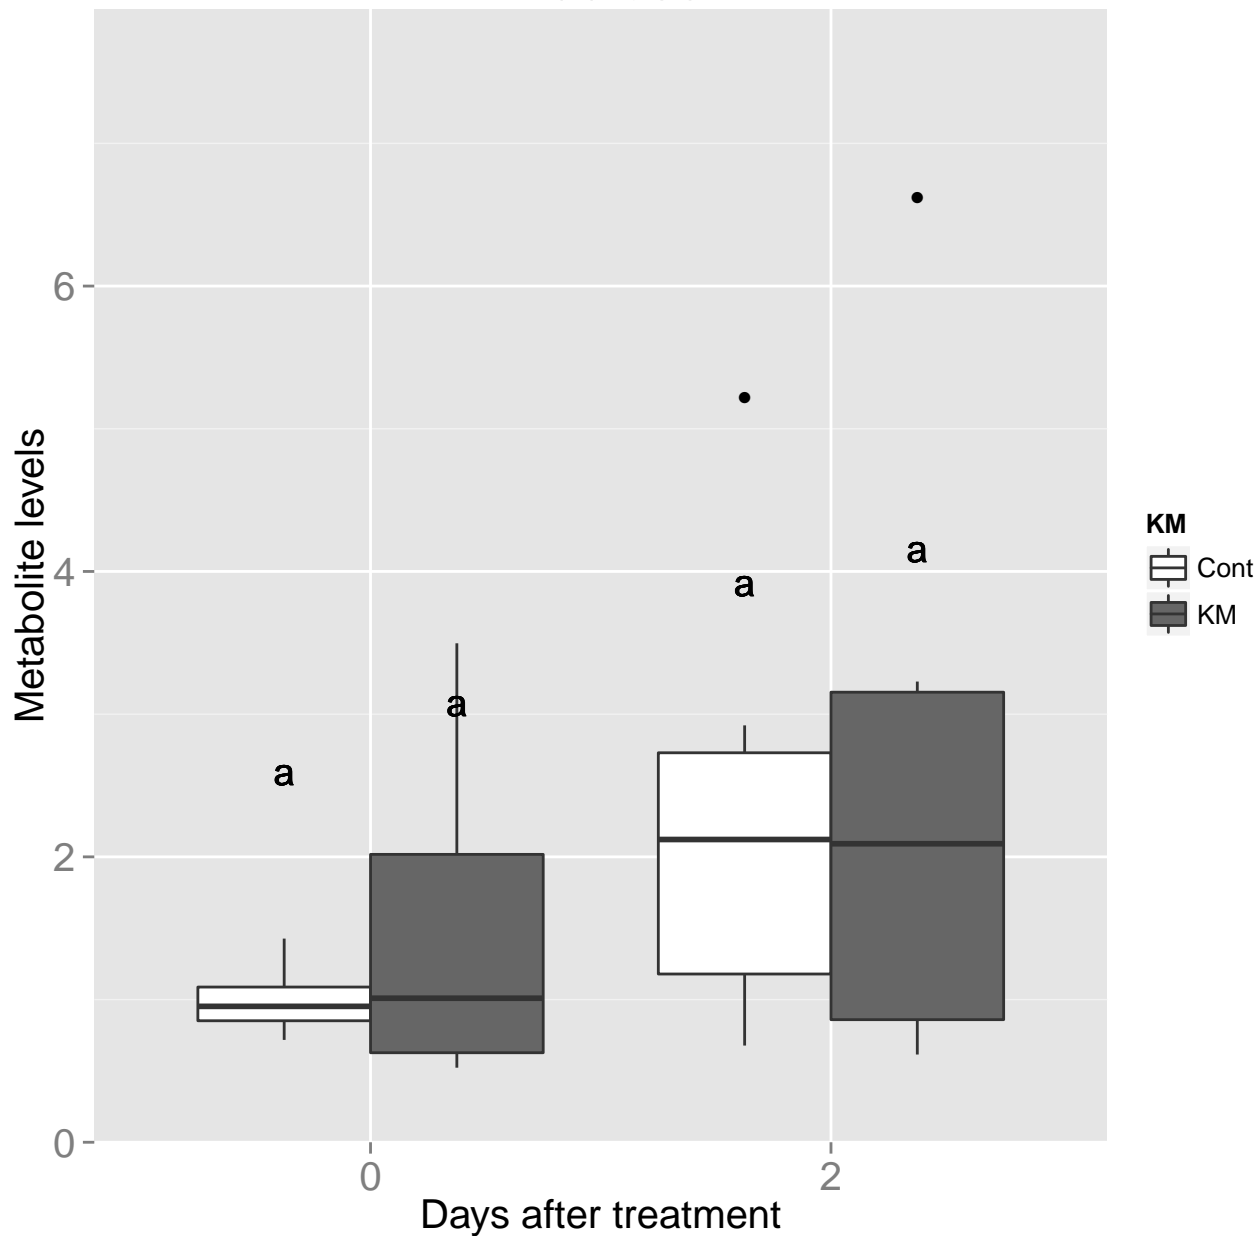

# Sorbitol

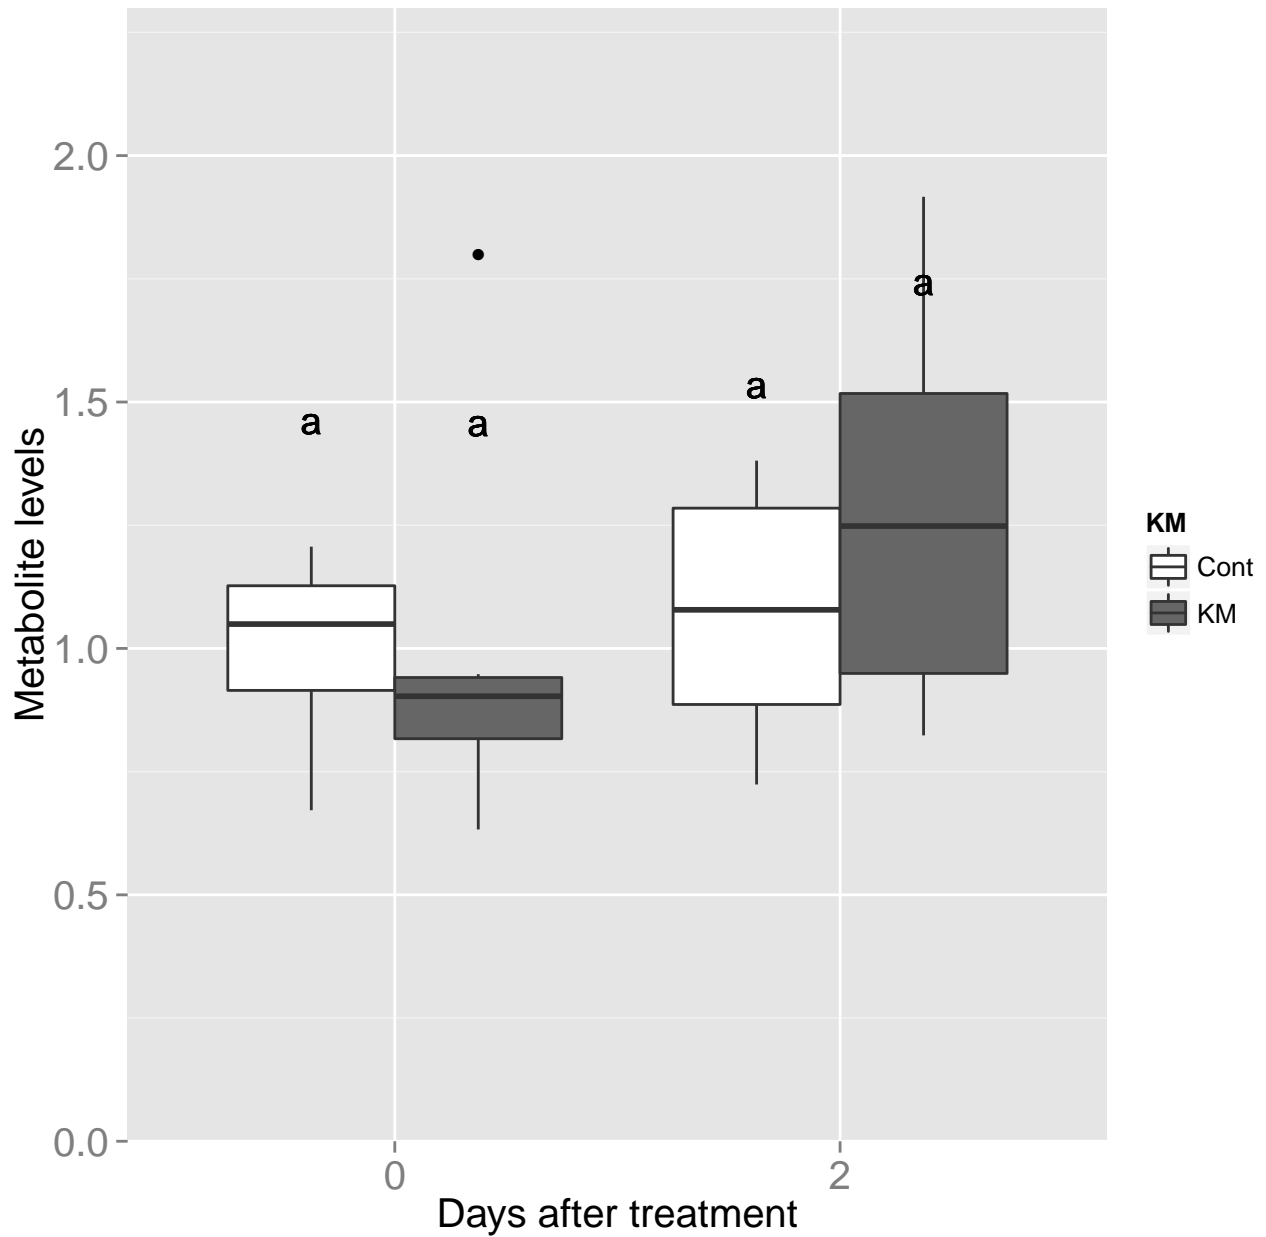

# Glucose

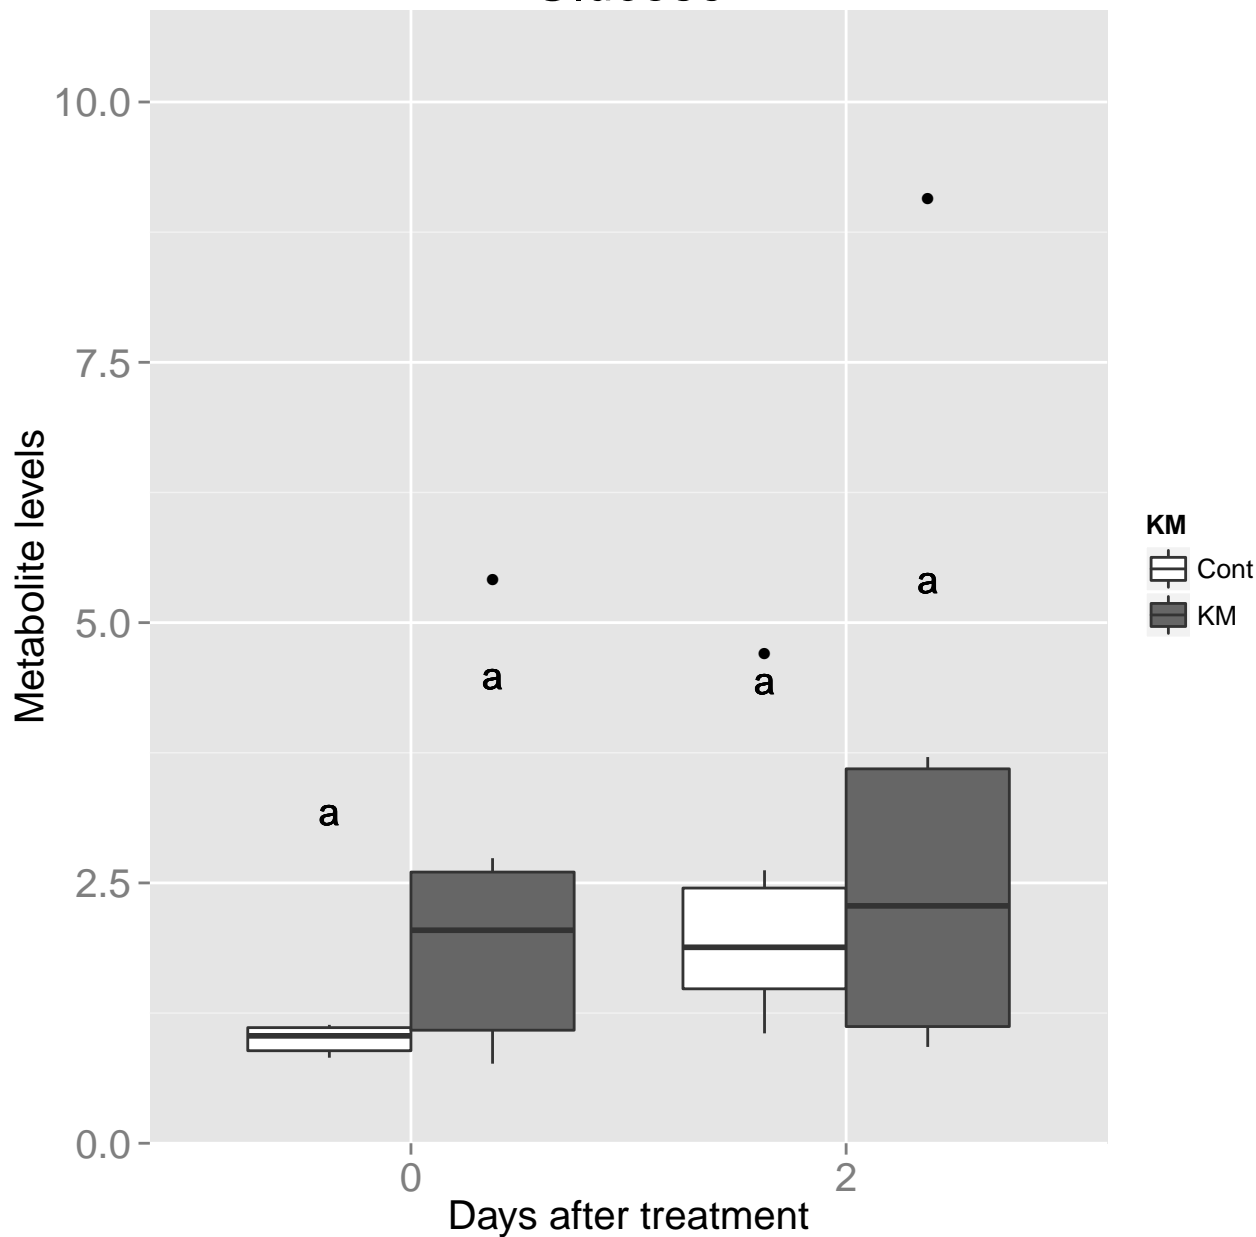

# Citrate

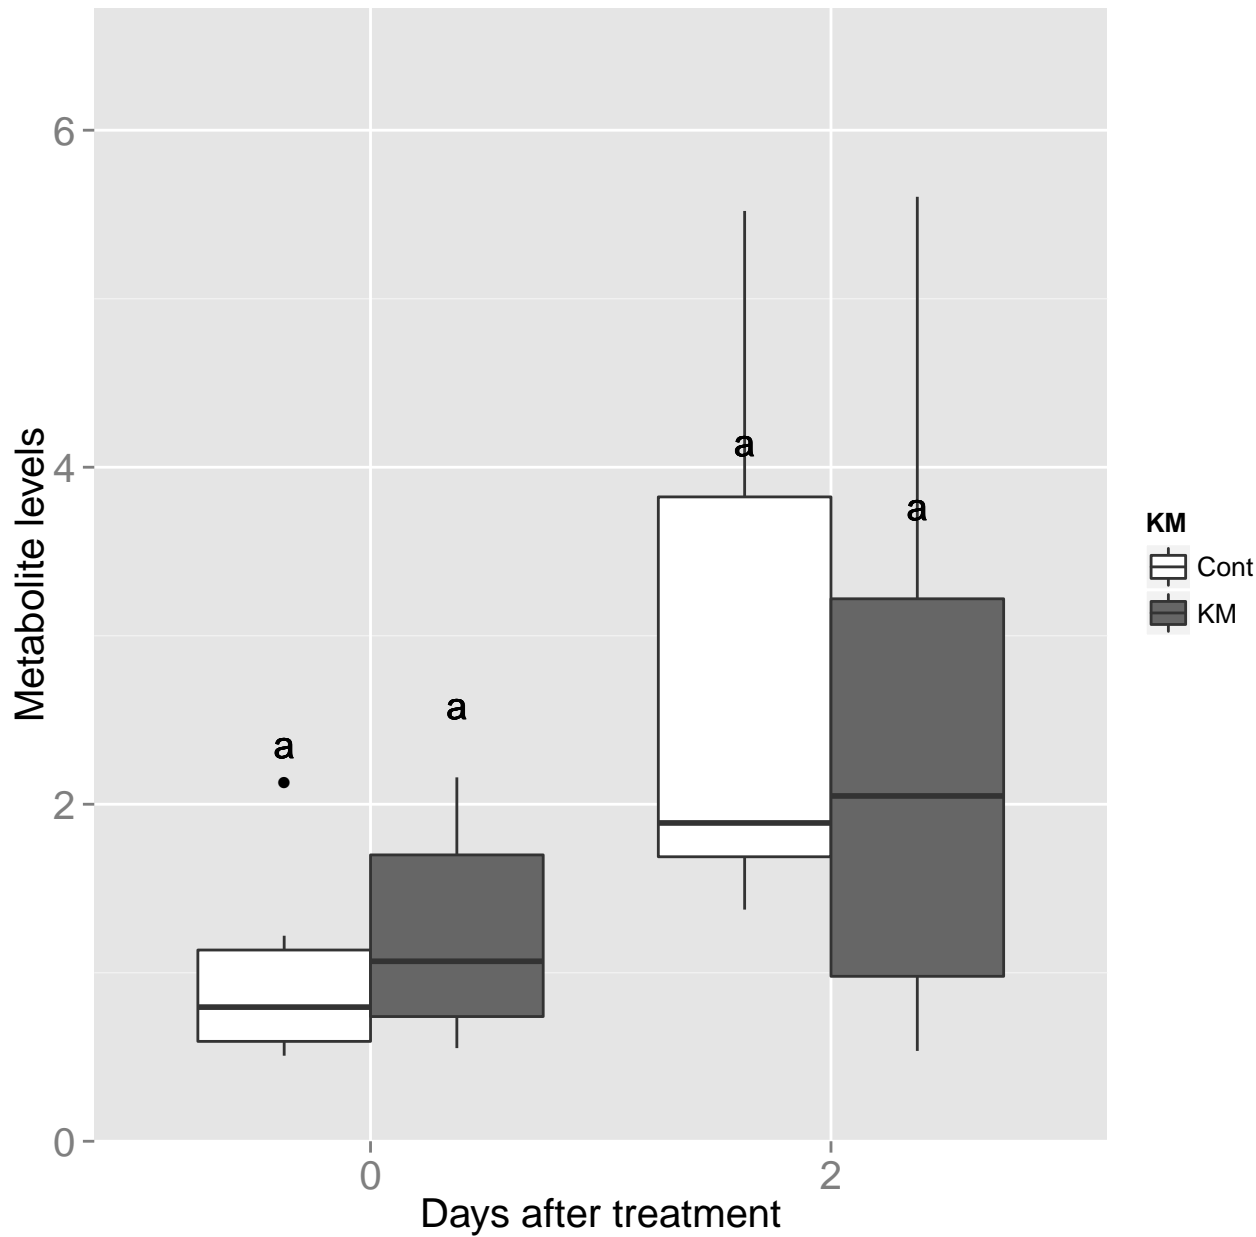

# Glutamine

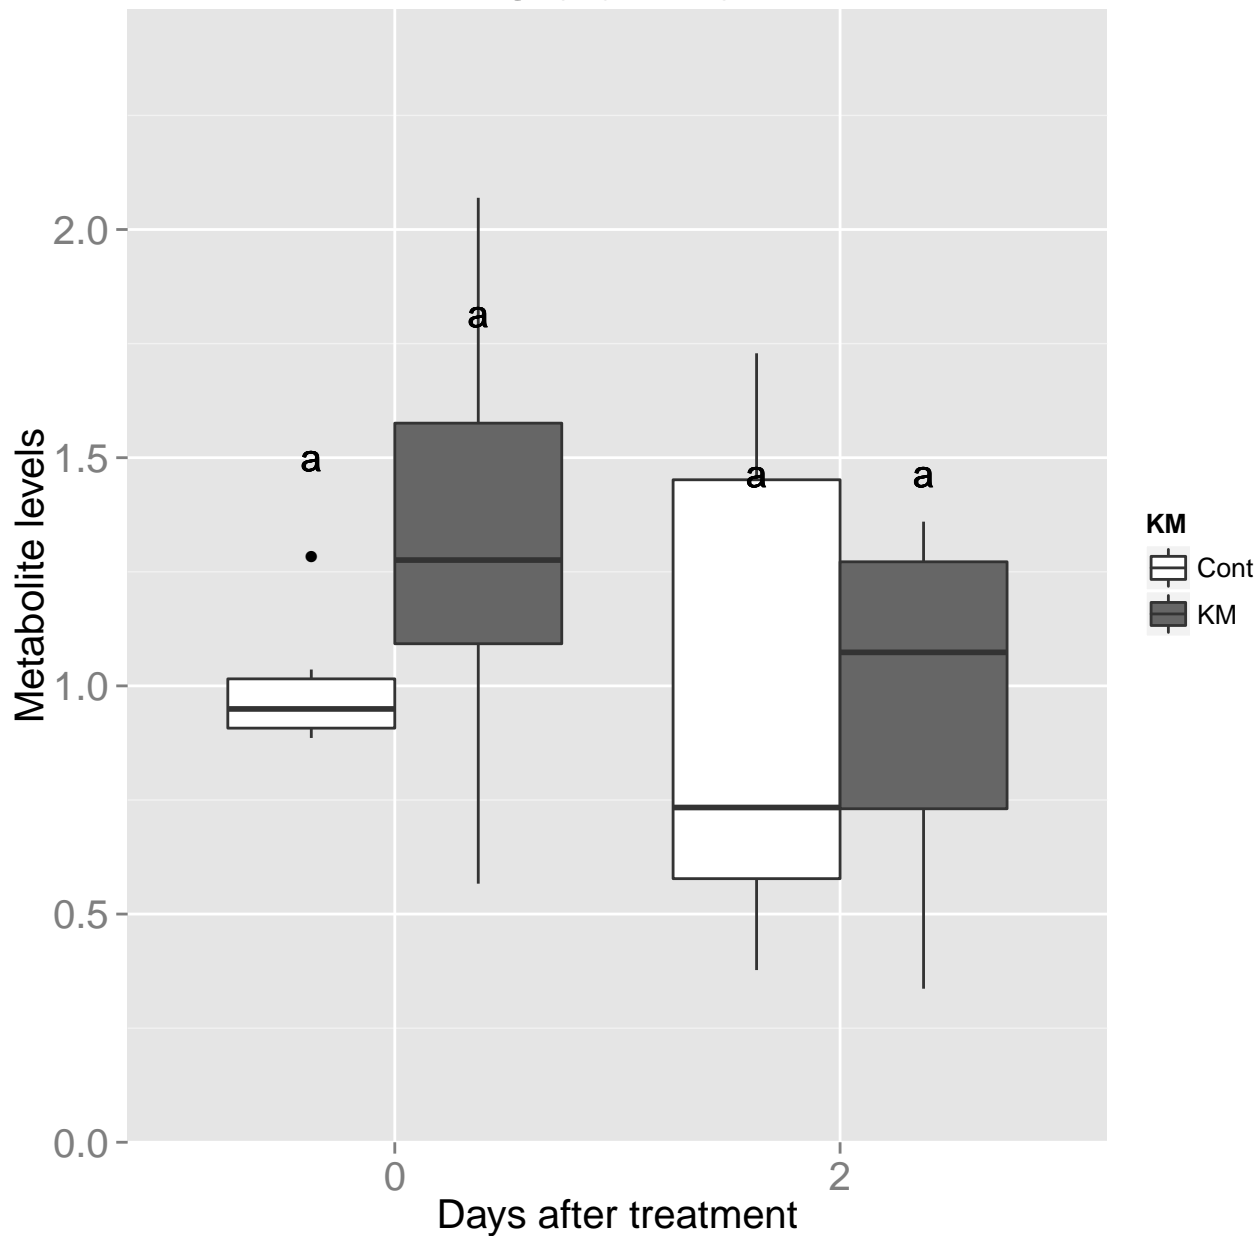

# X2.oxogulonate

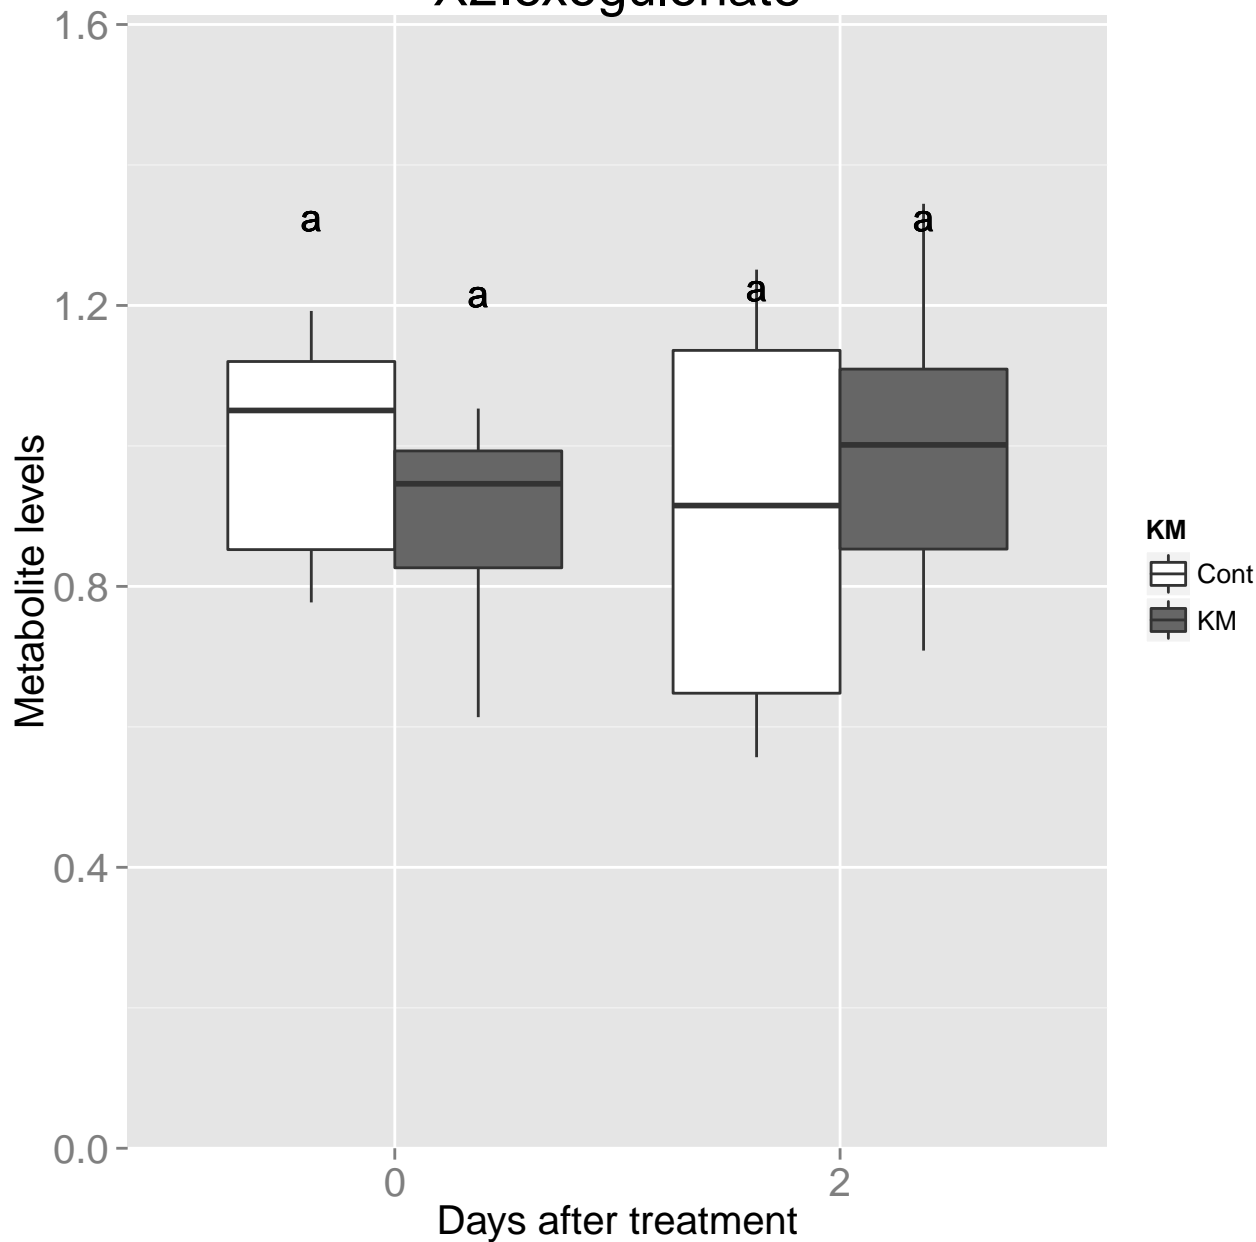



# Glucopyranoside

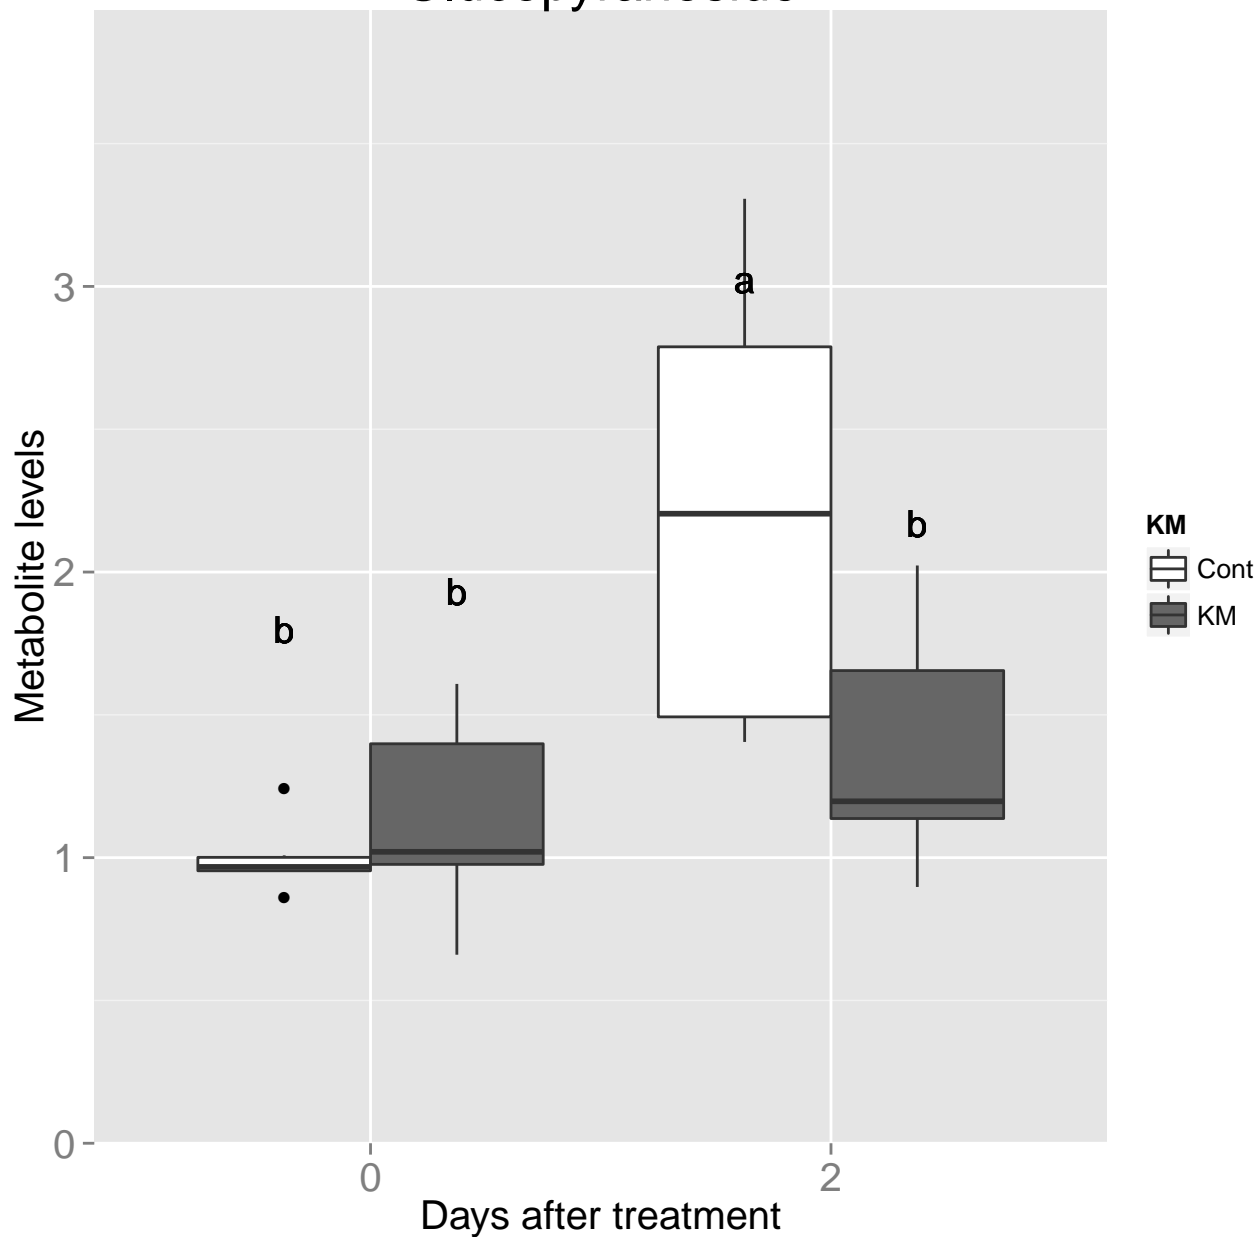

# Galactonolactone

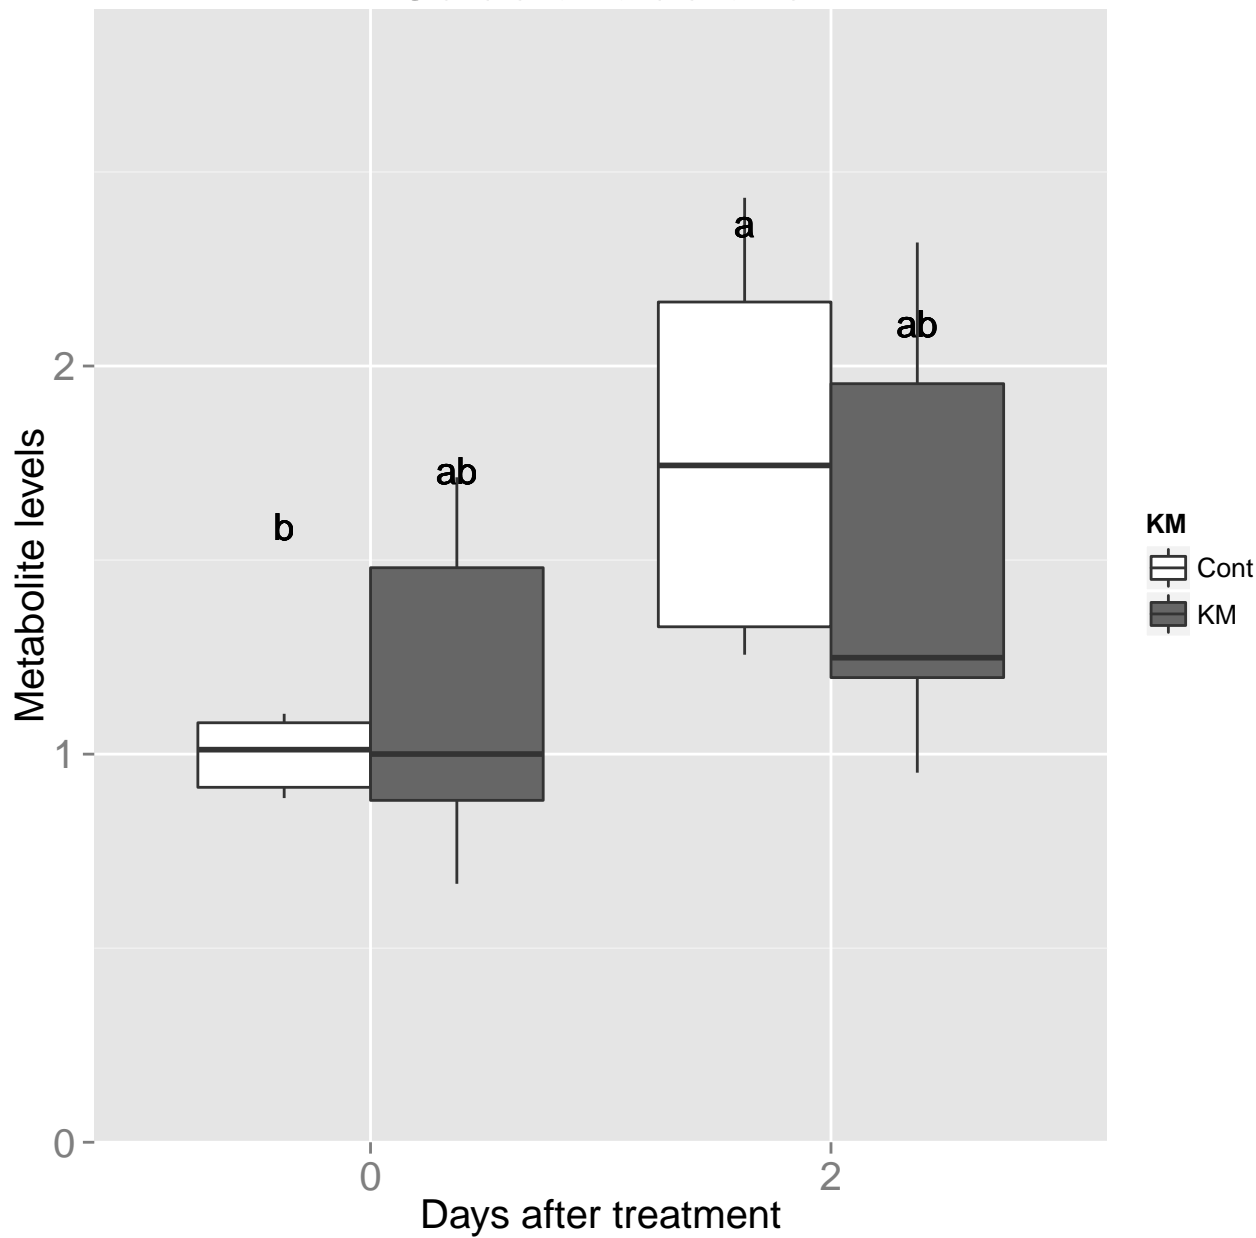

# Dehydroascorbate

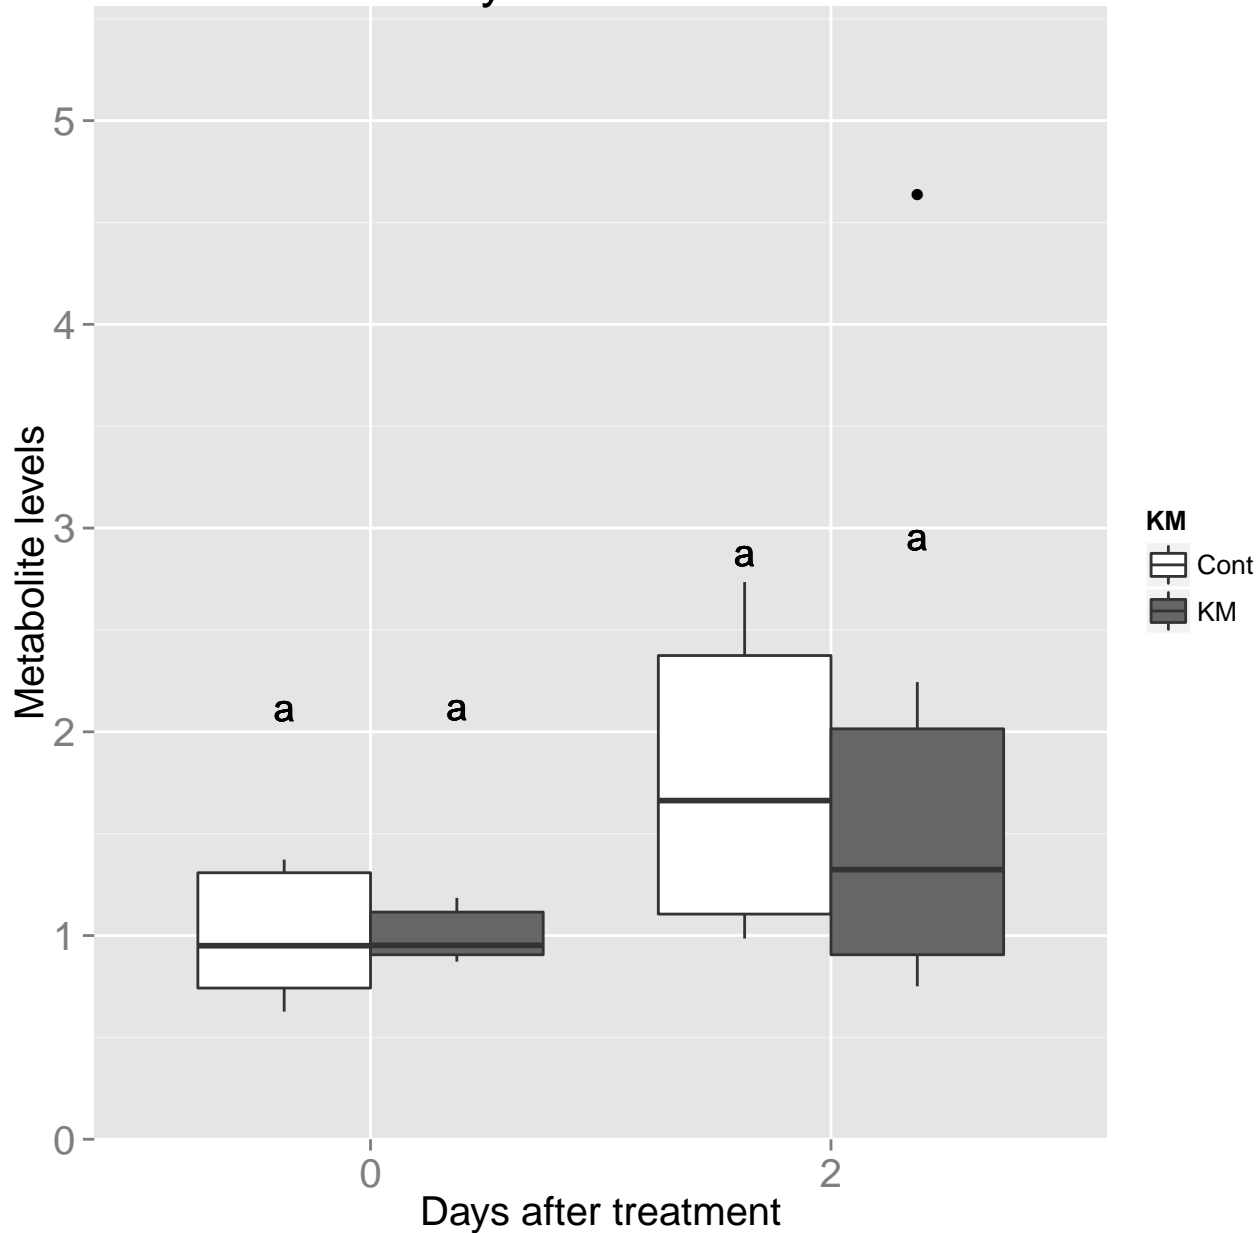

# Galactonate

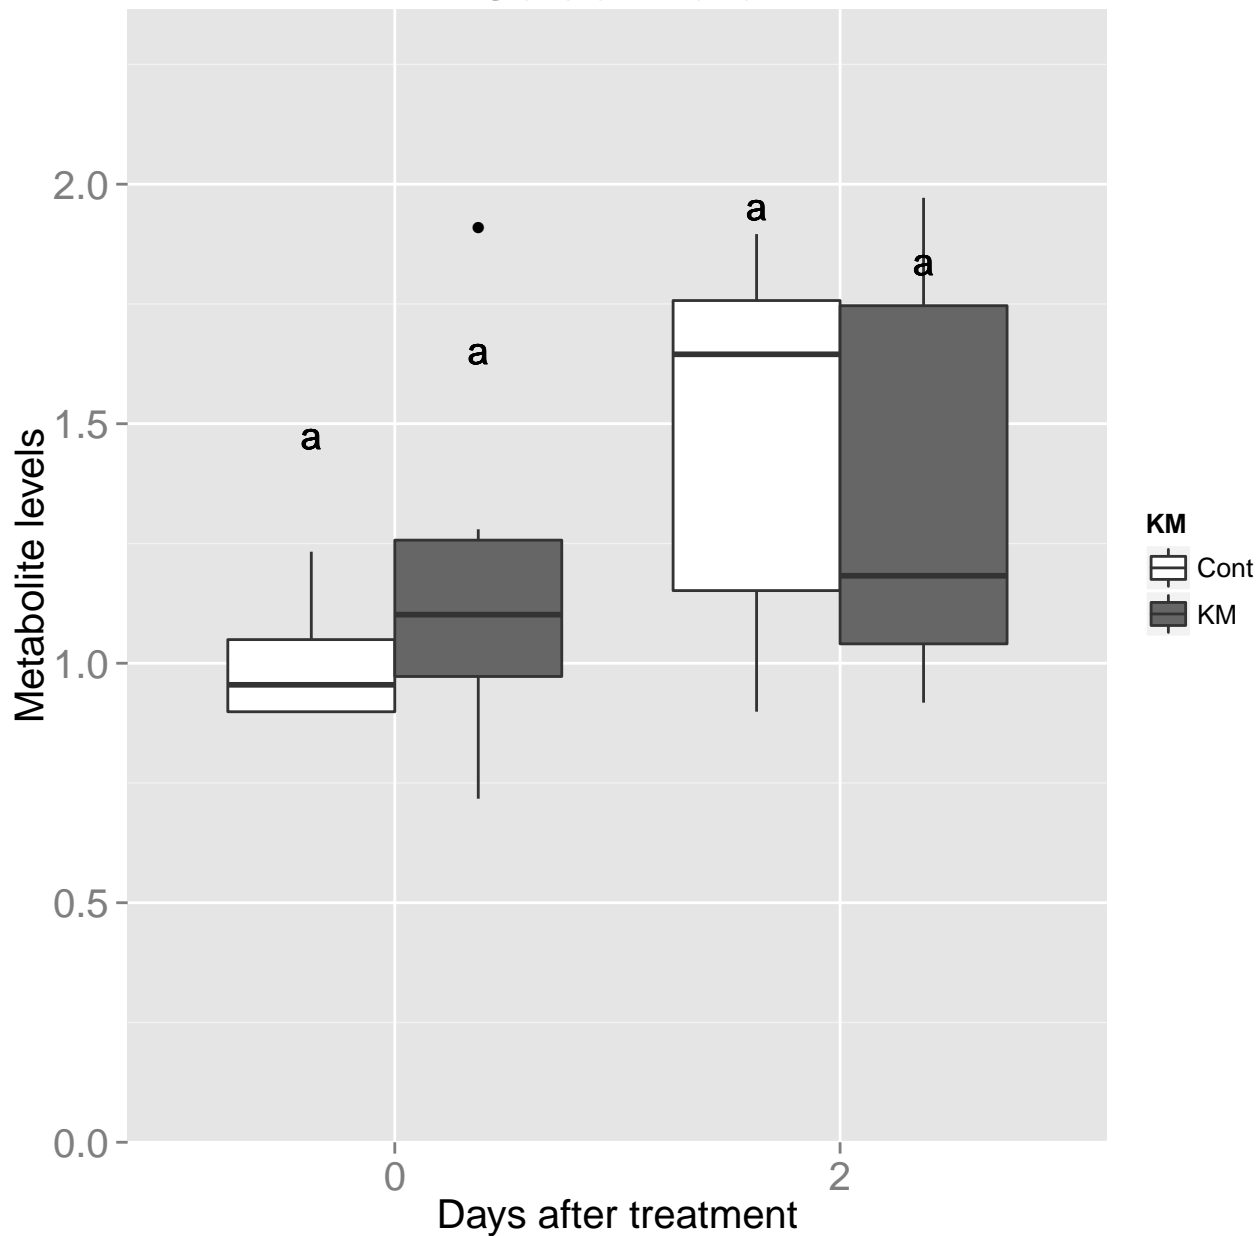

# Tyramine

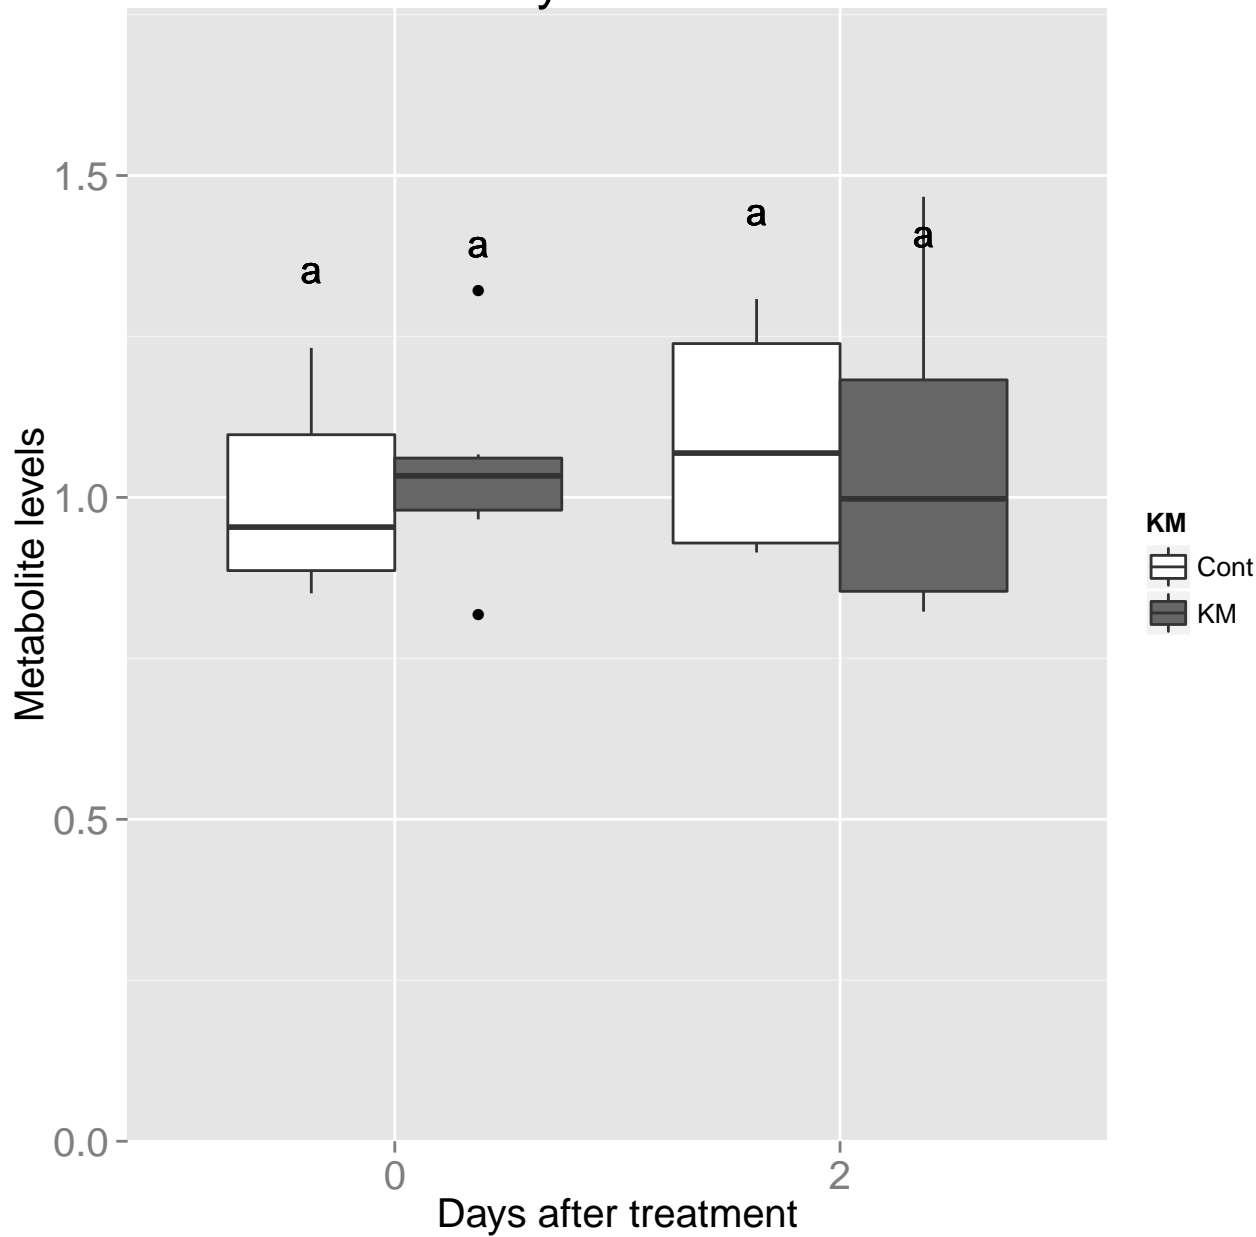

# myo.inositol

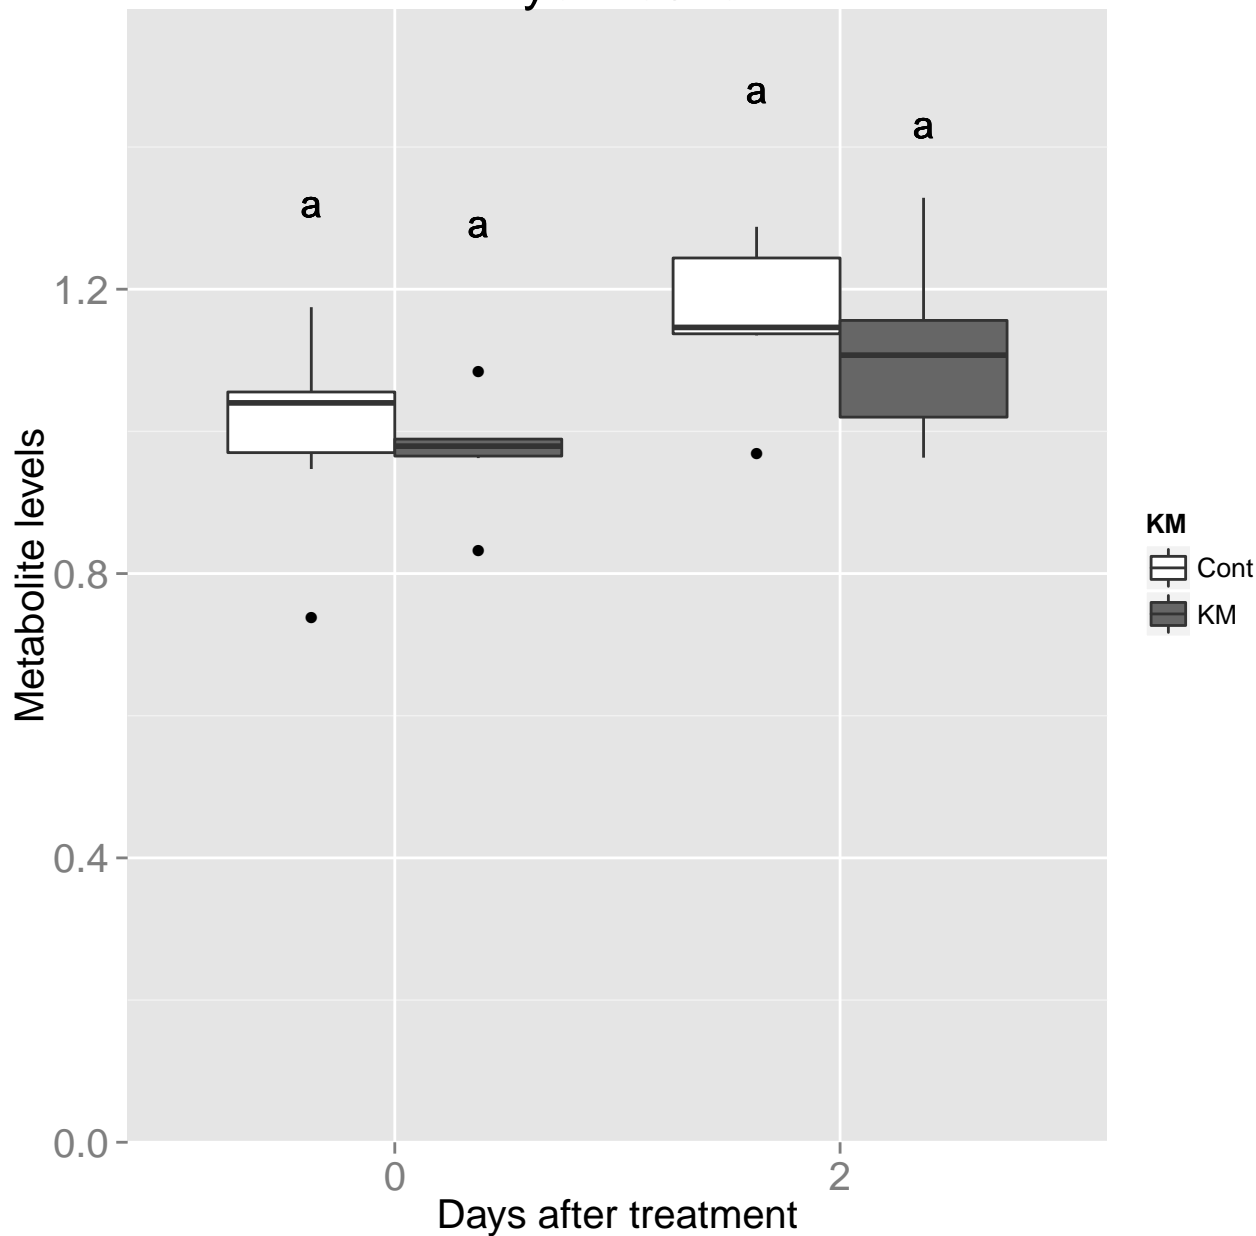

# Tyrosine

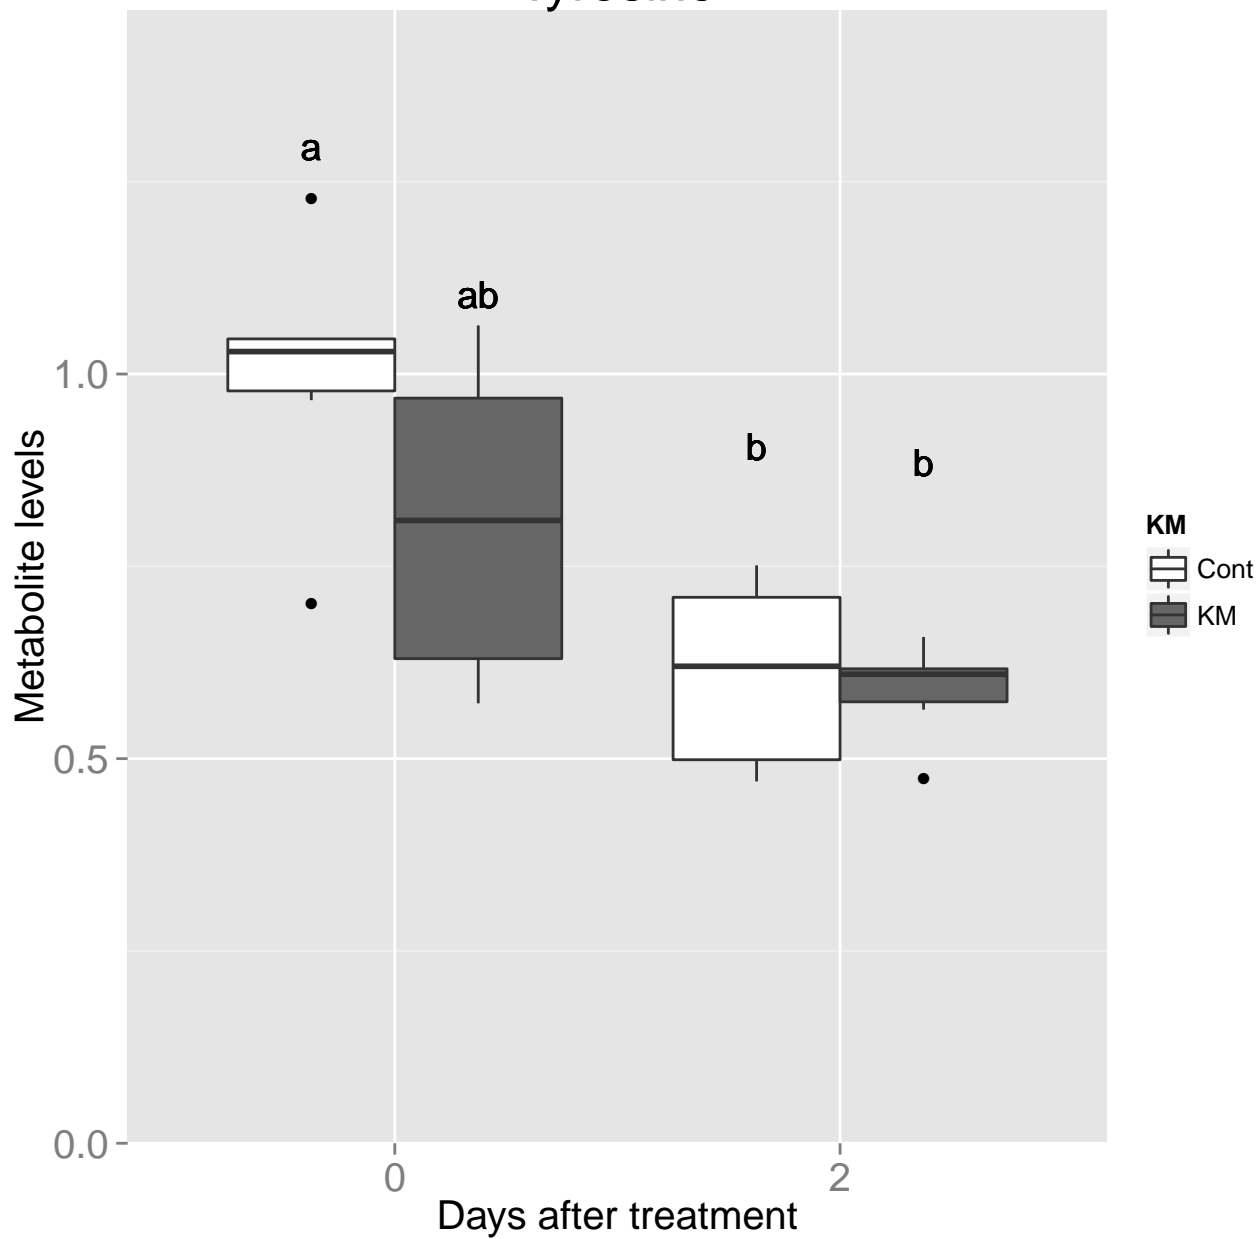

# Histidine

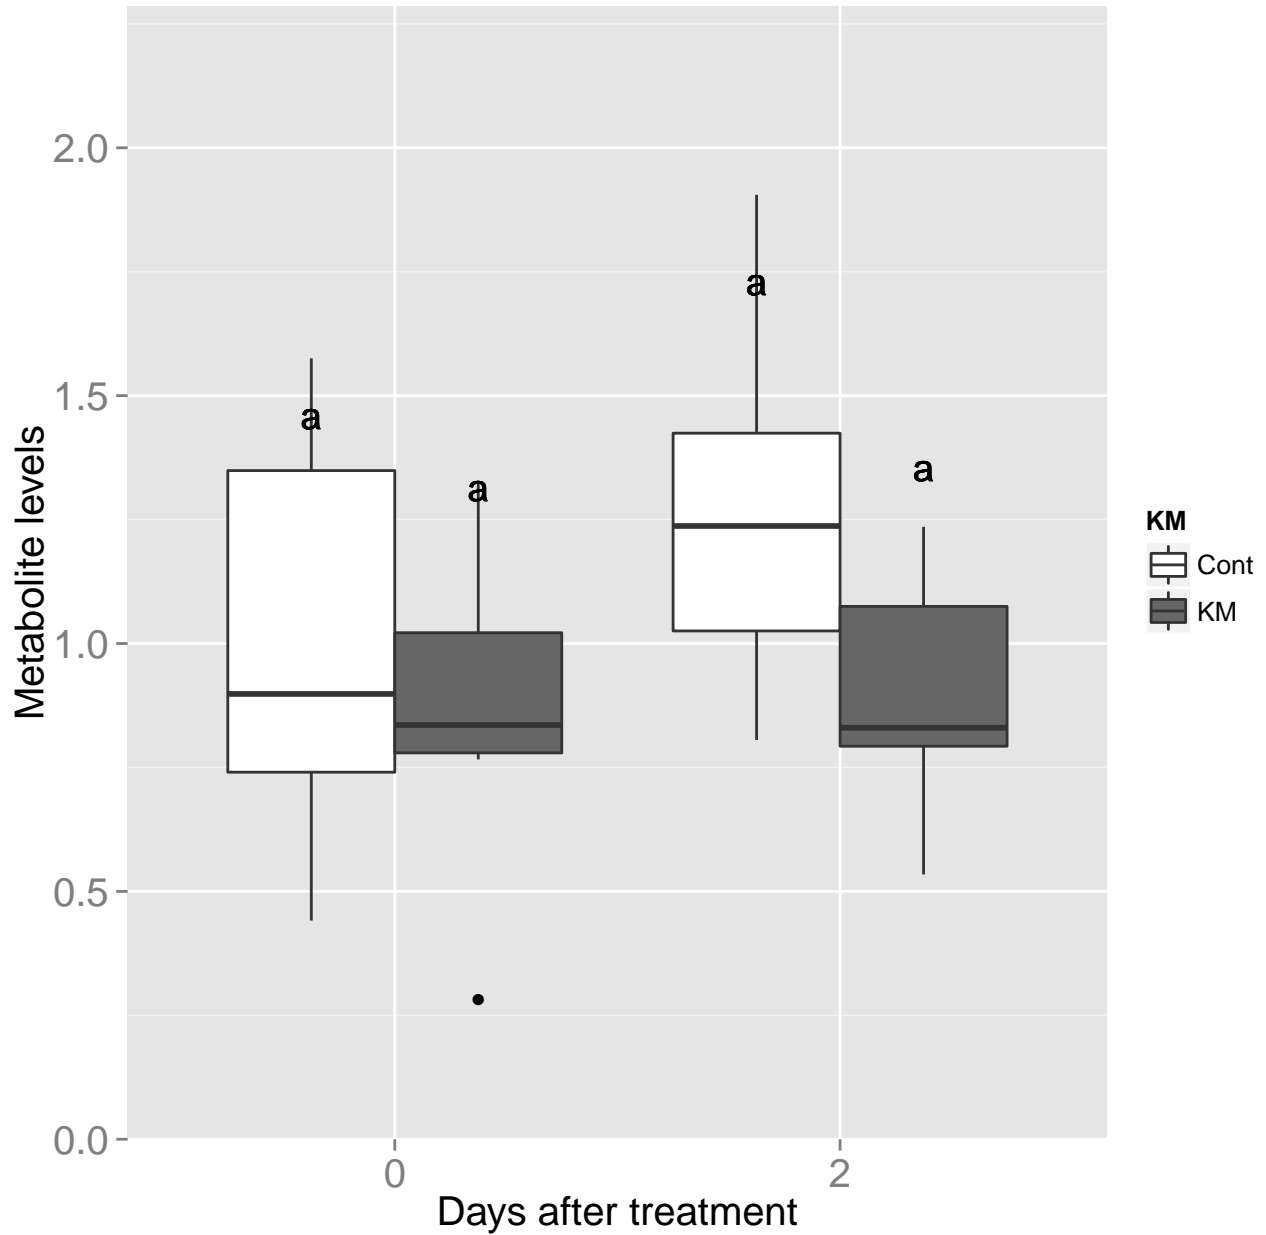



# Adenine

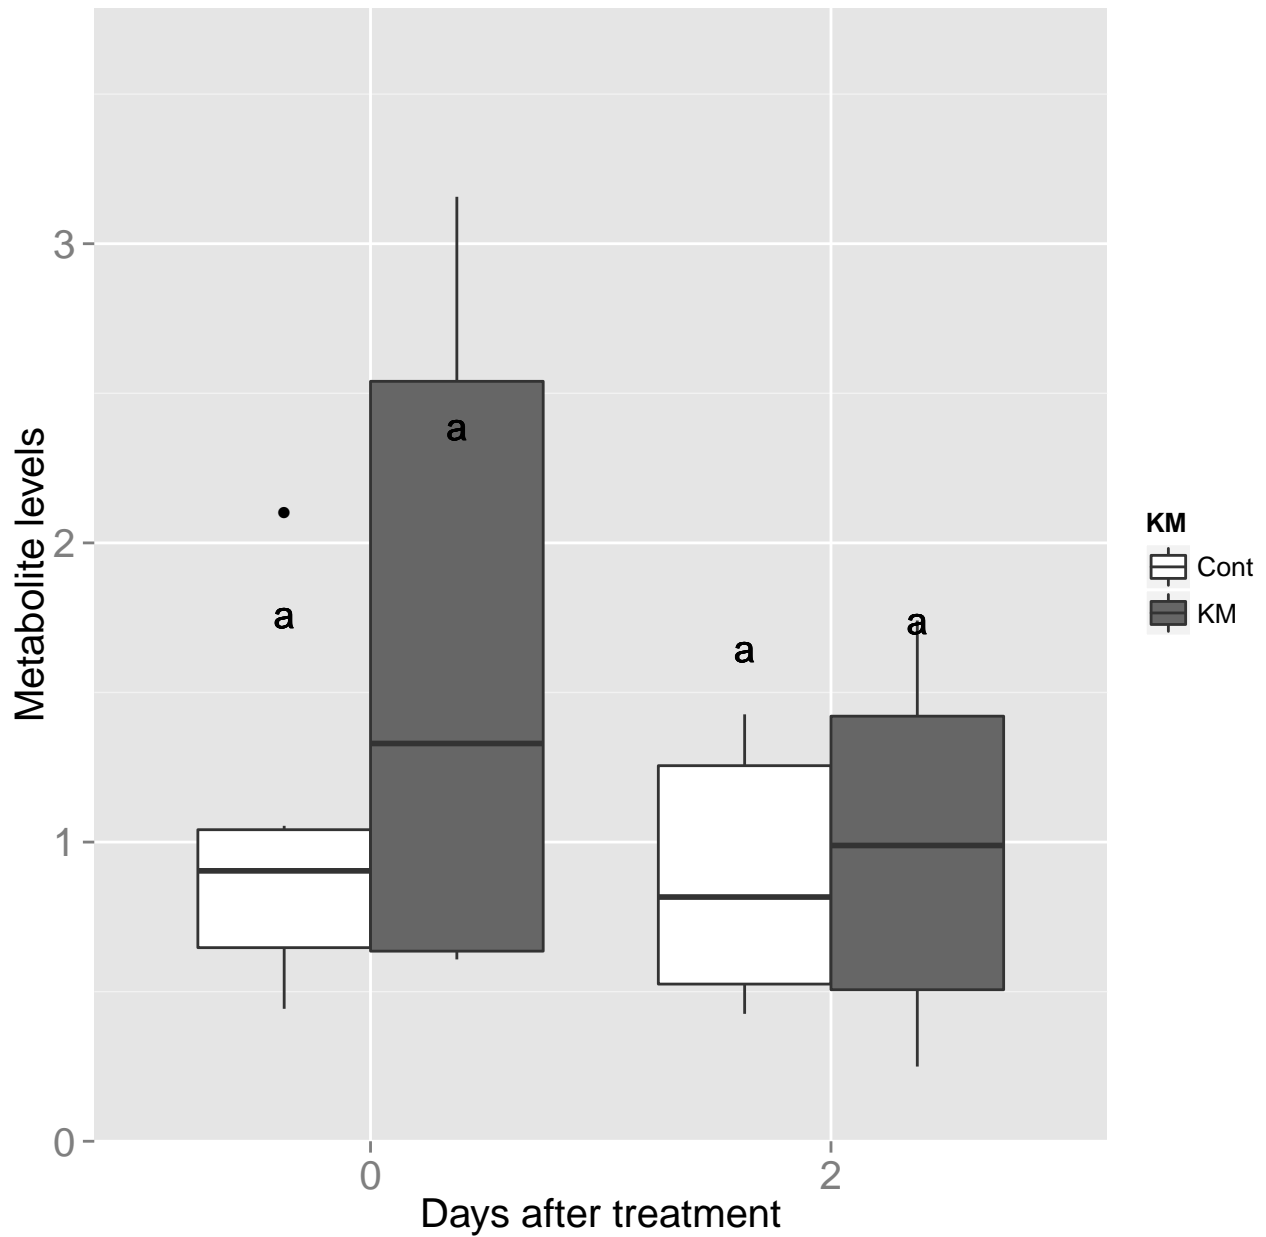

# Tryptophane

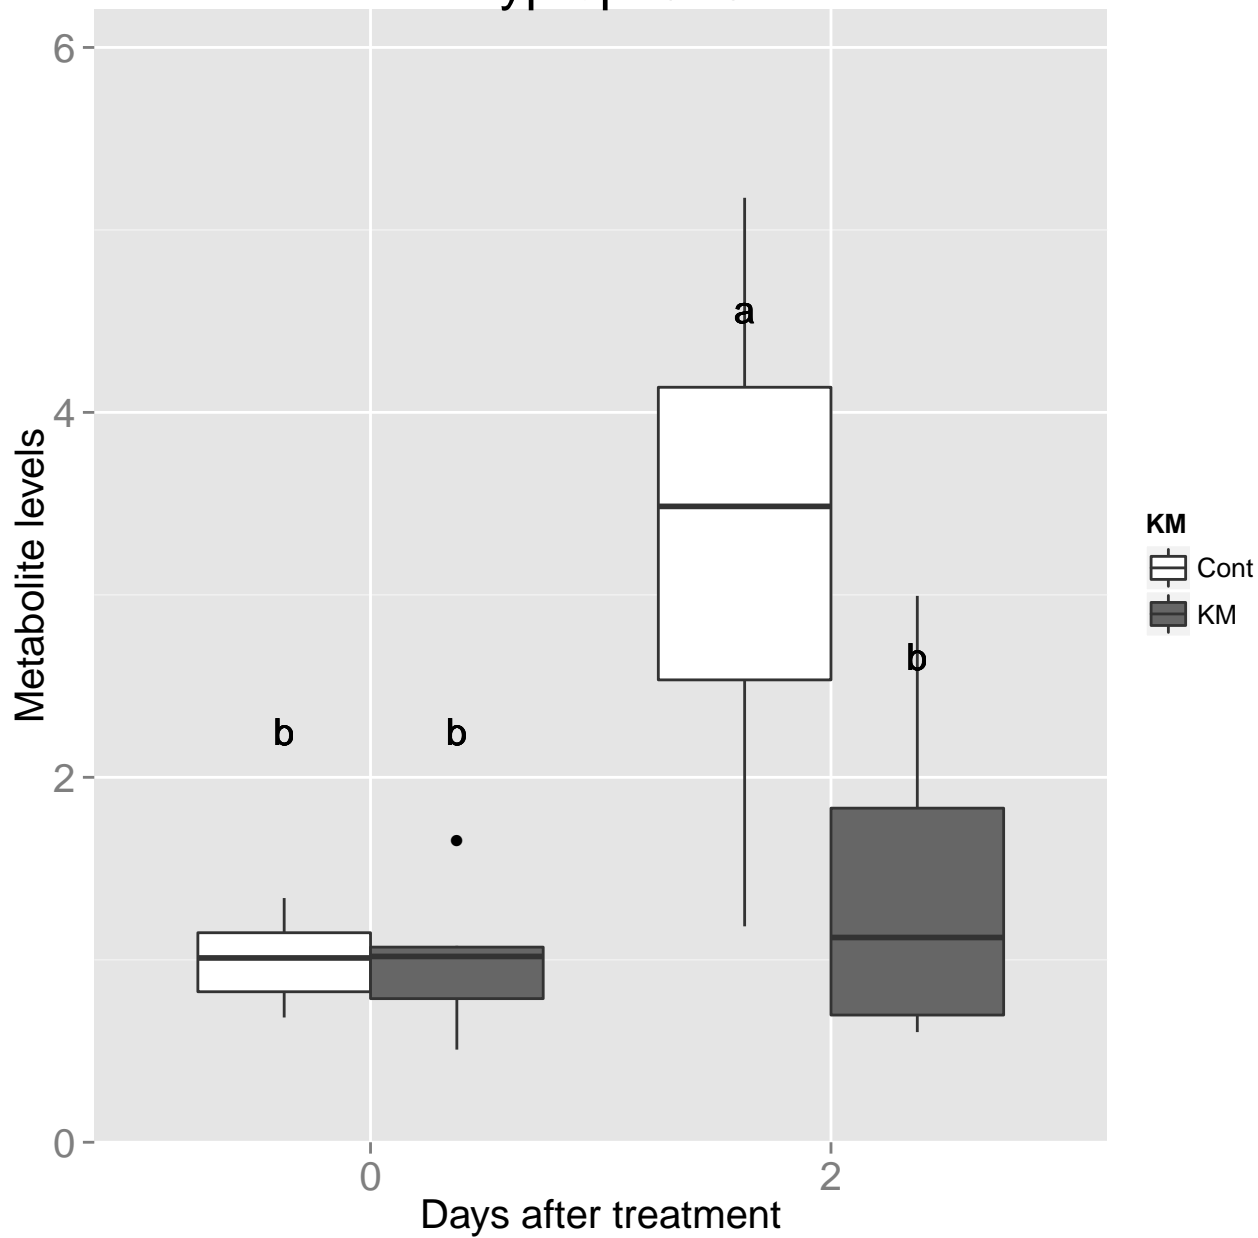

# Sucrose

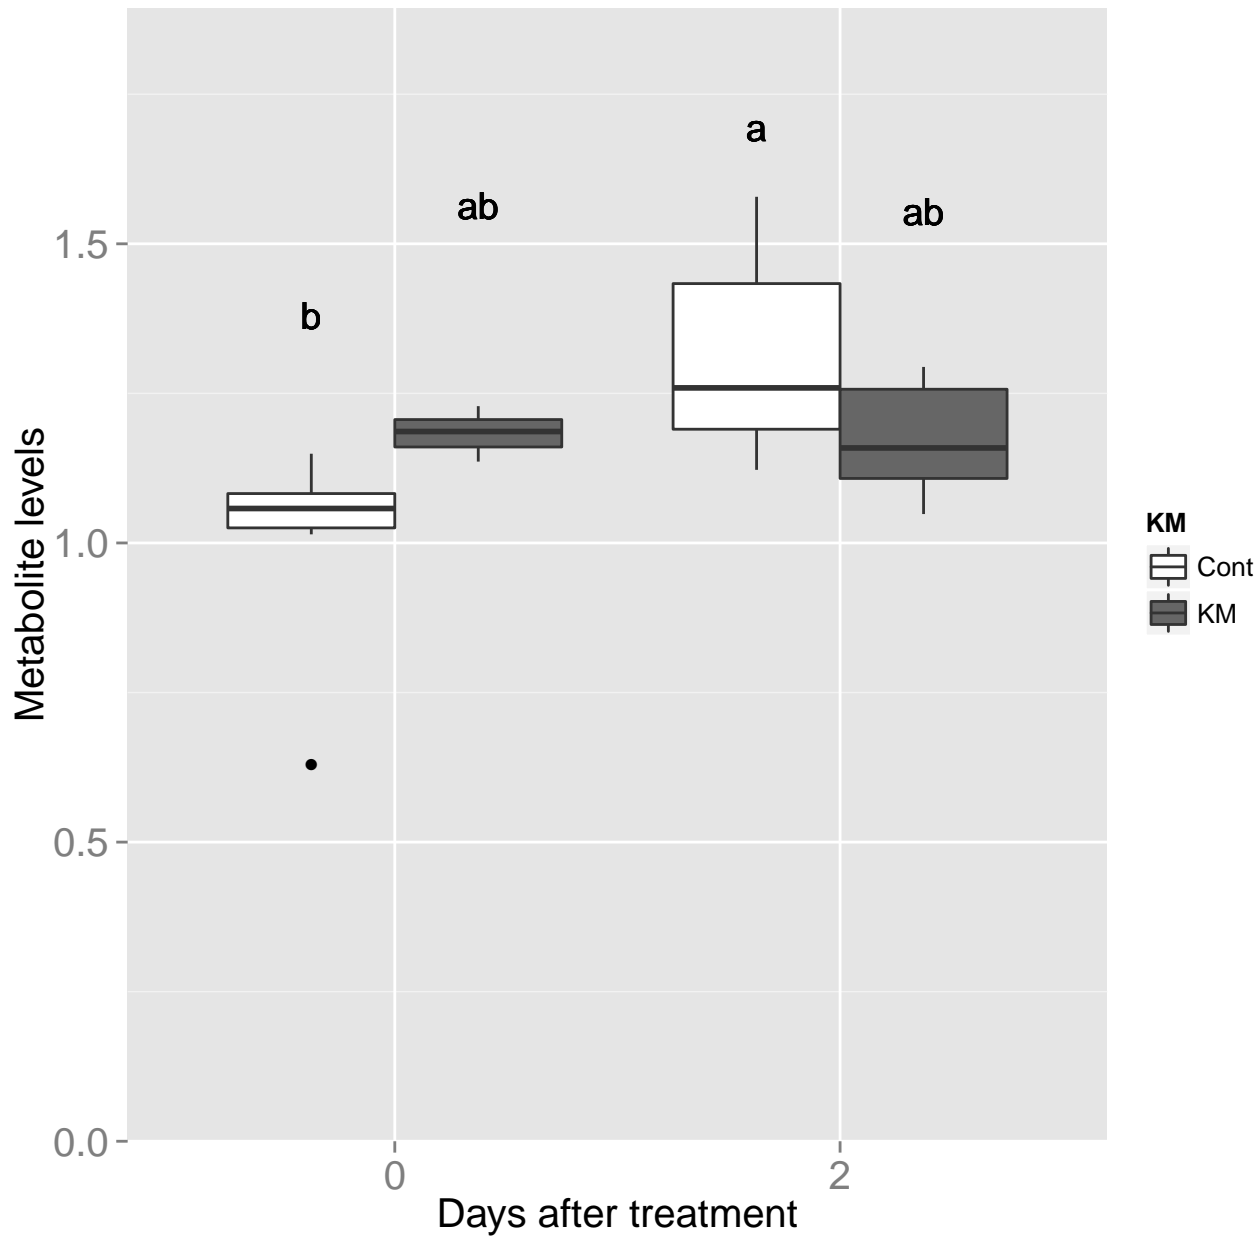

# Cellobiose

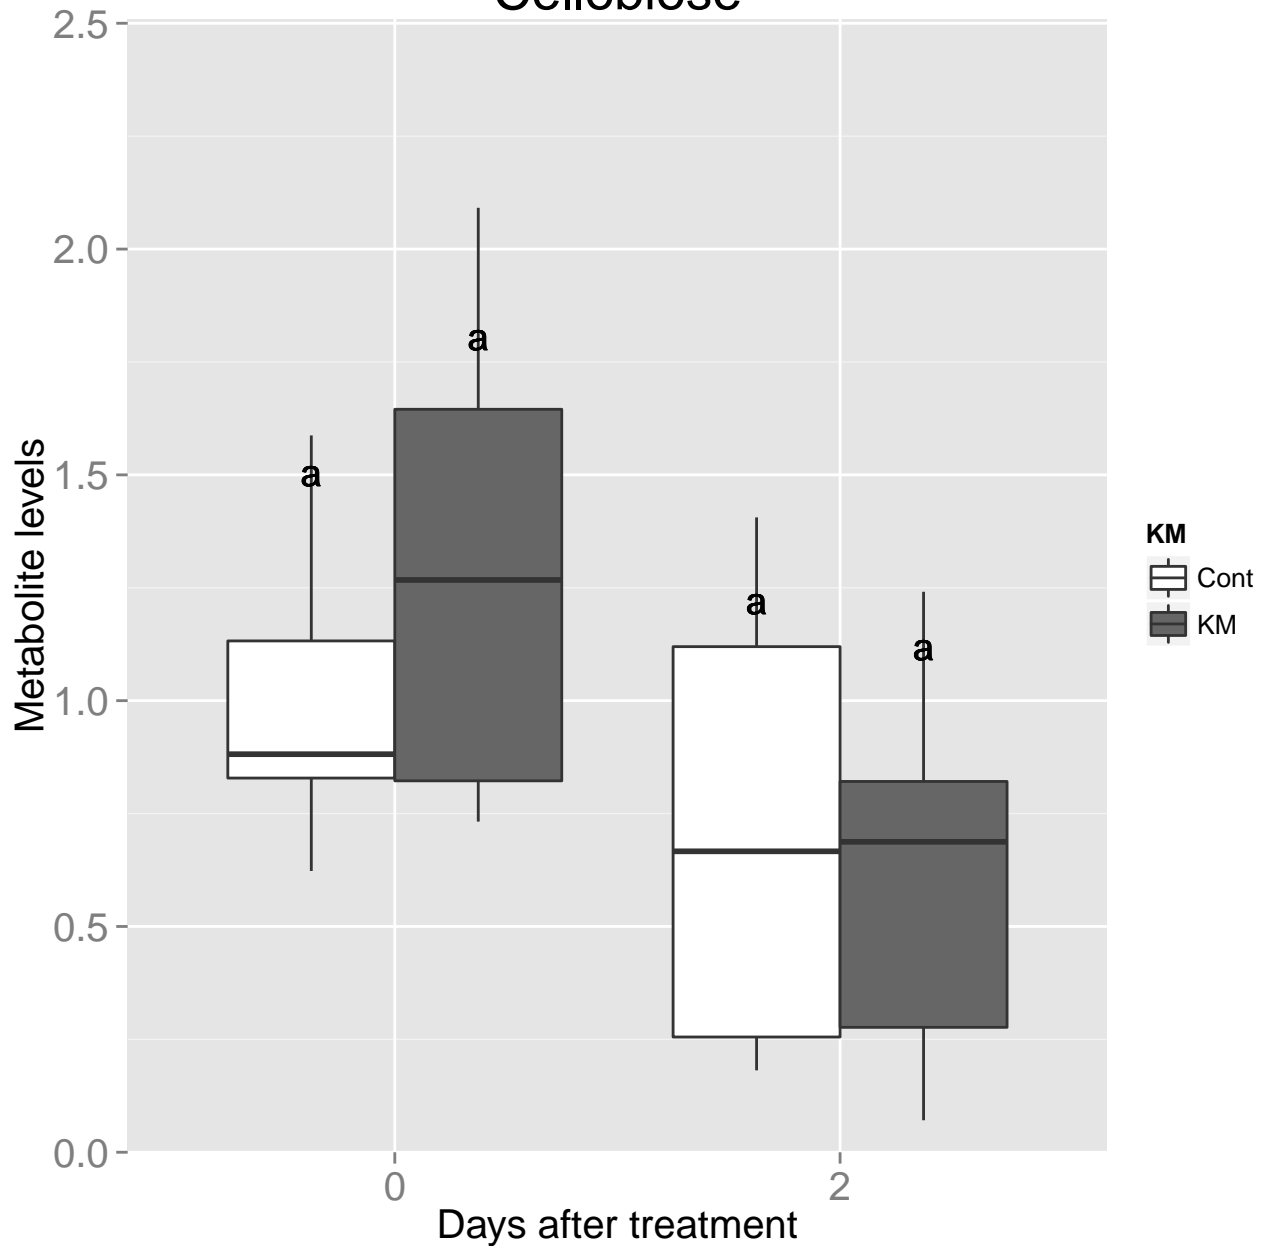

# Maltose

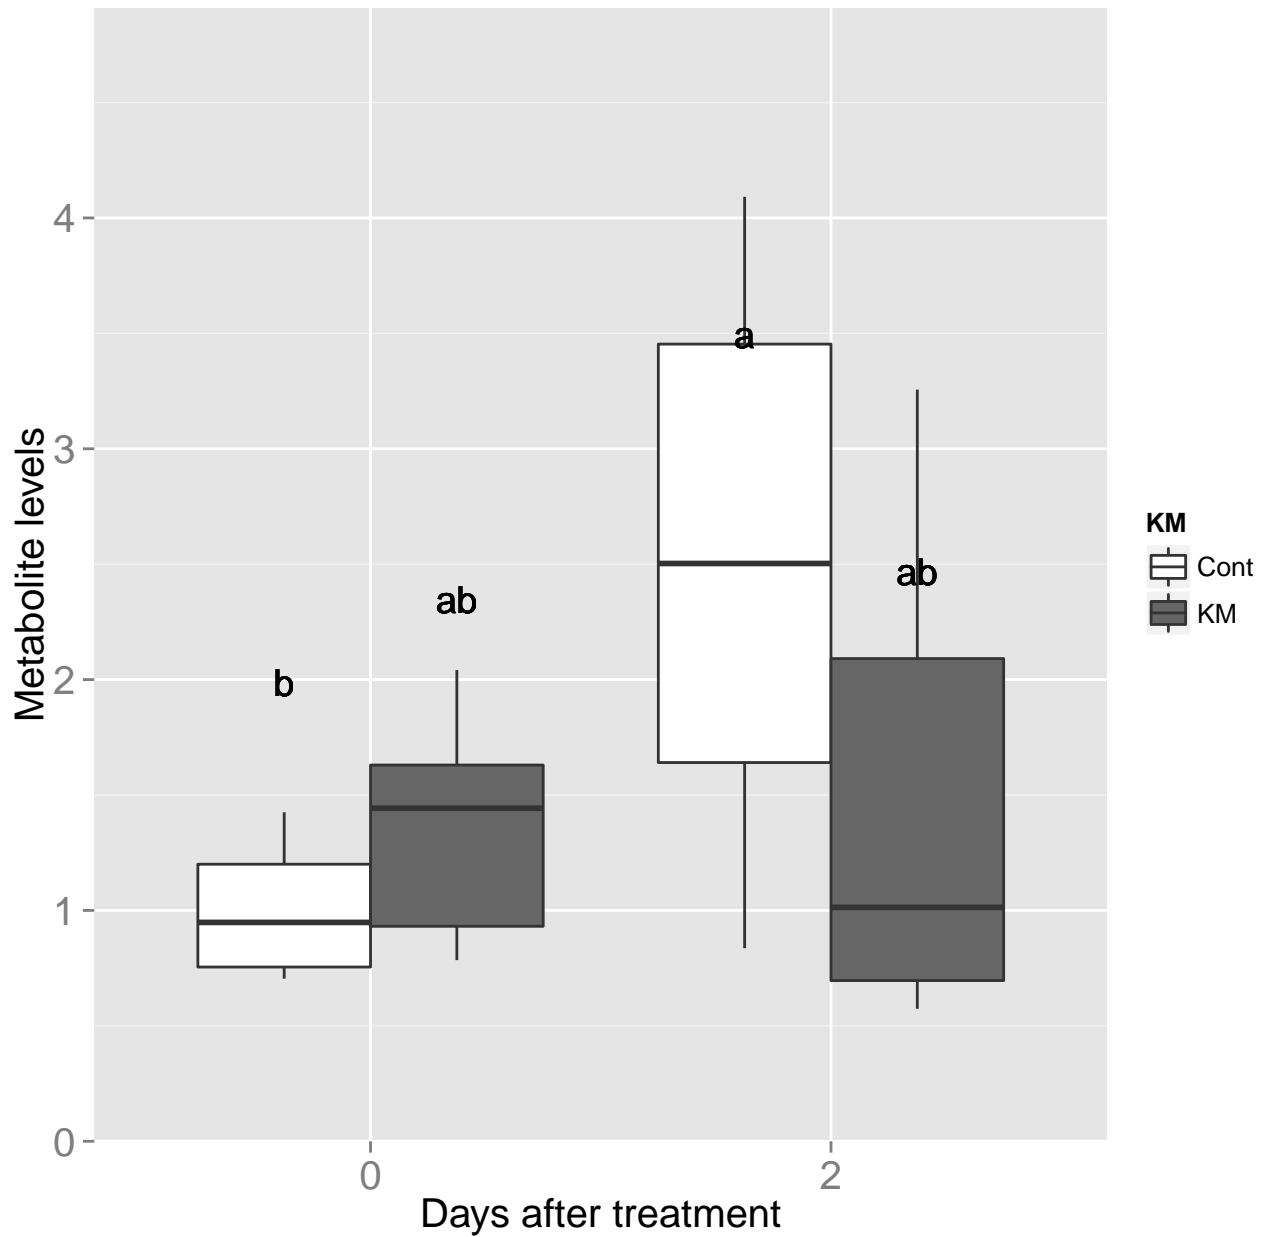

# Trehalose

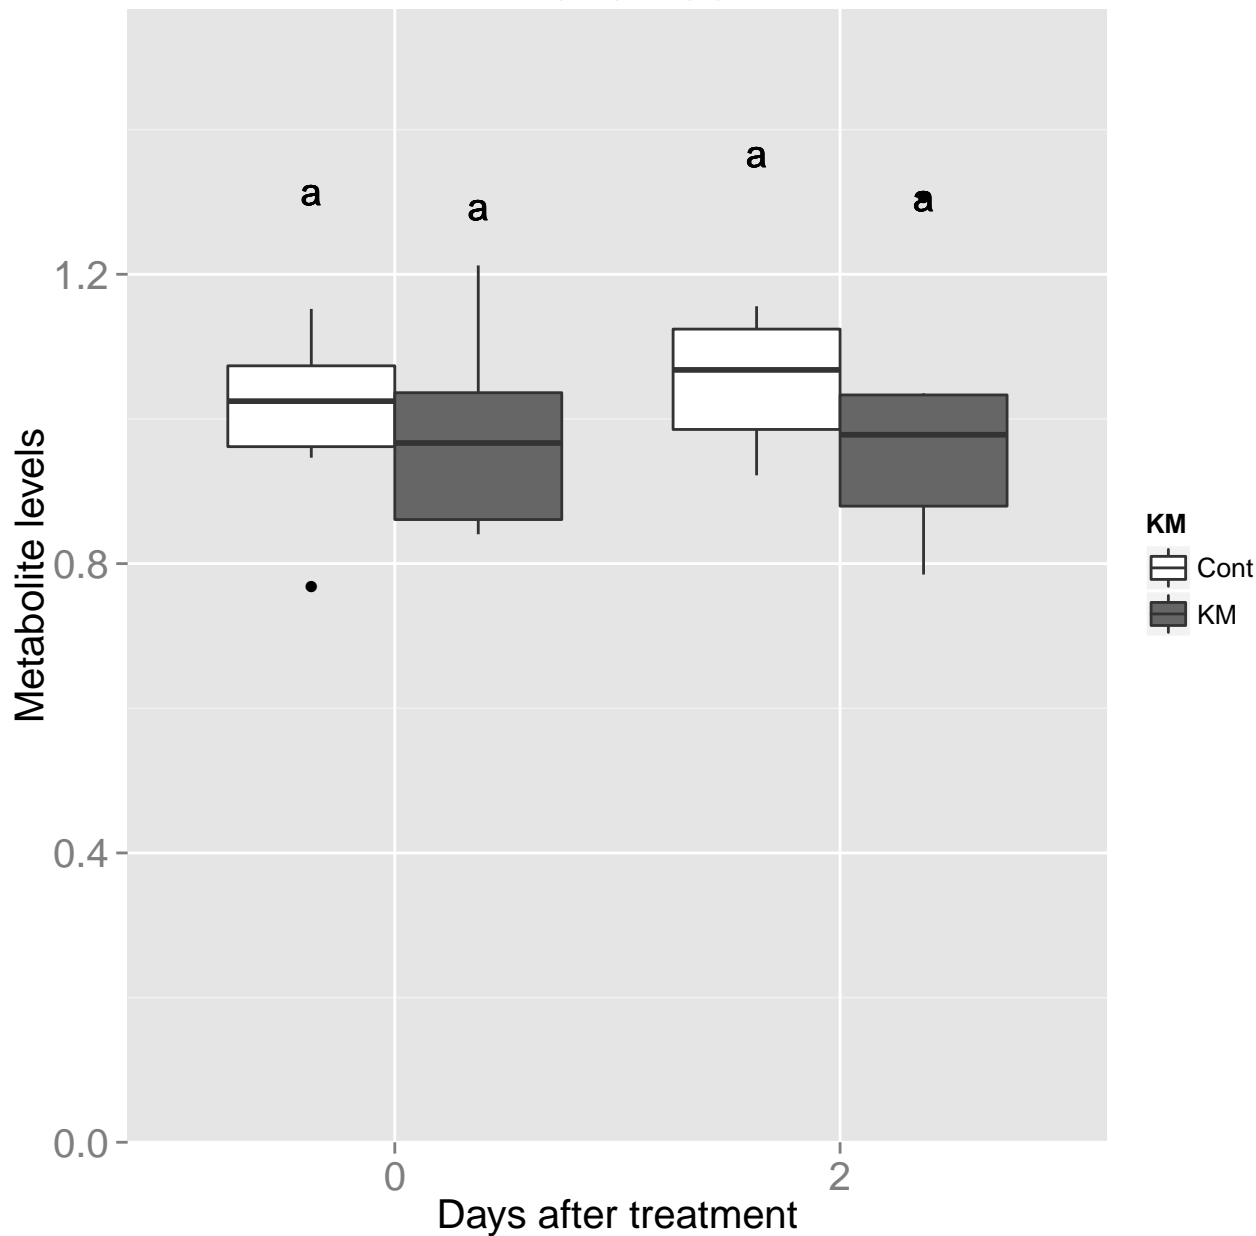

# Galactinol

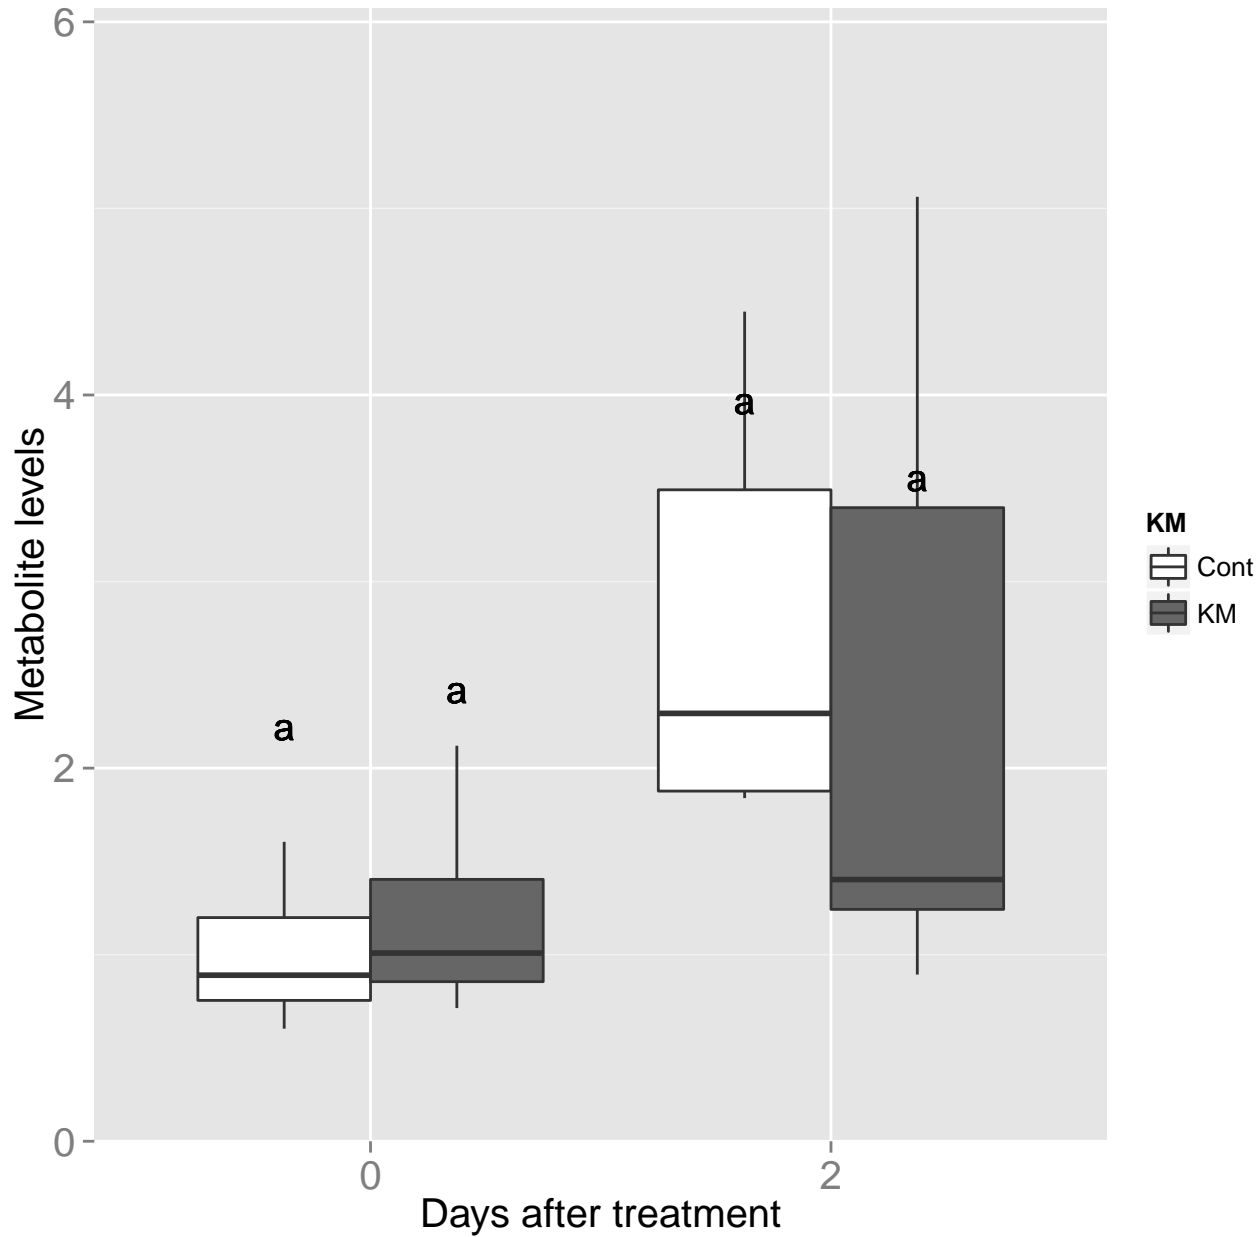

# Raffinose

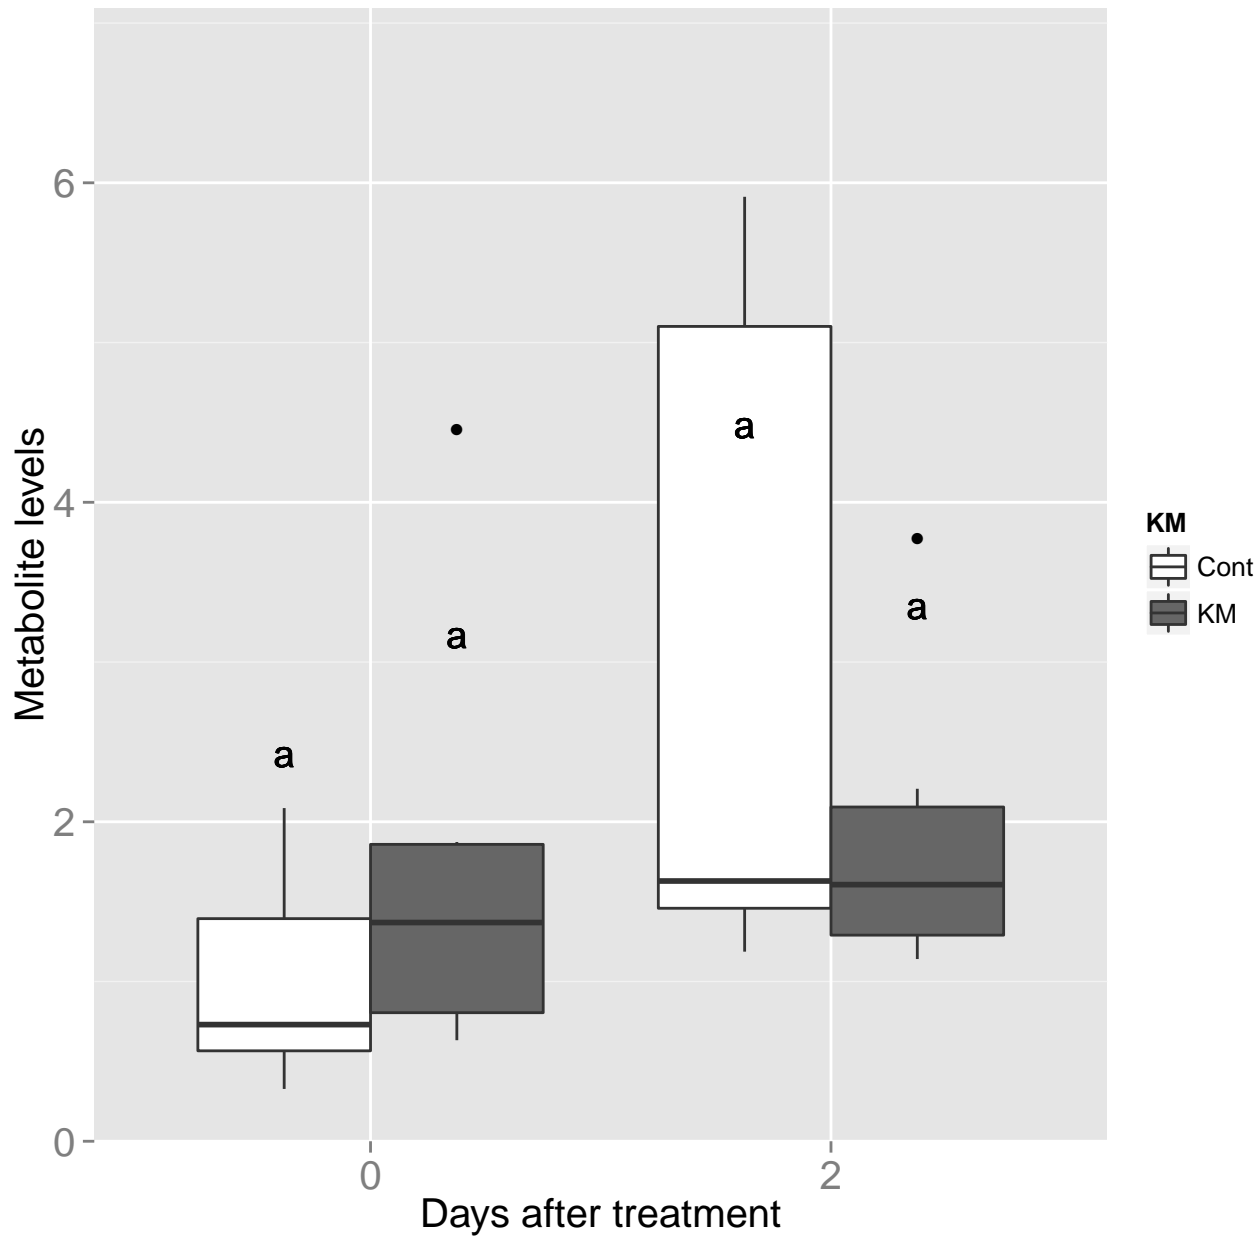



## Alanine

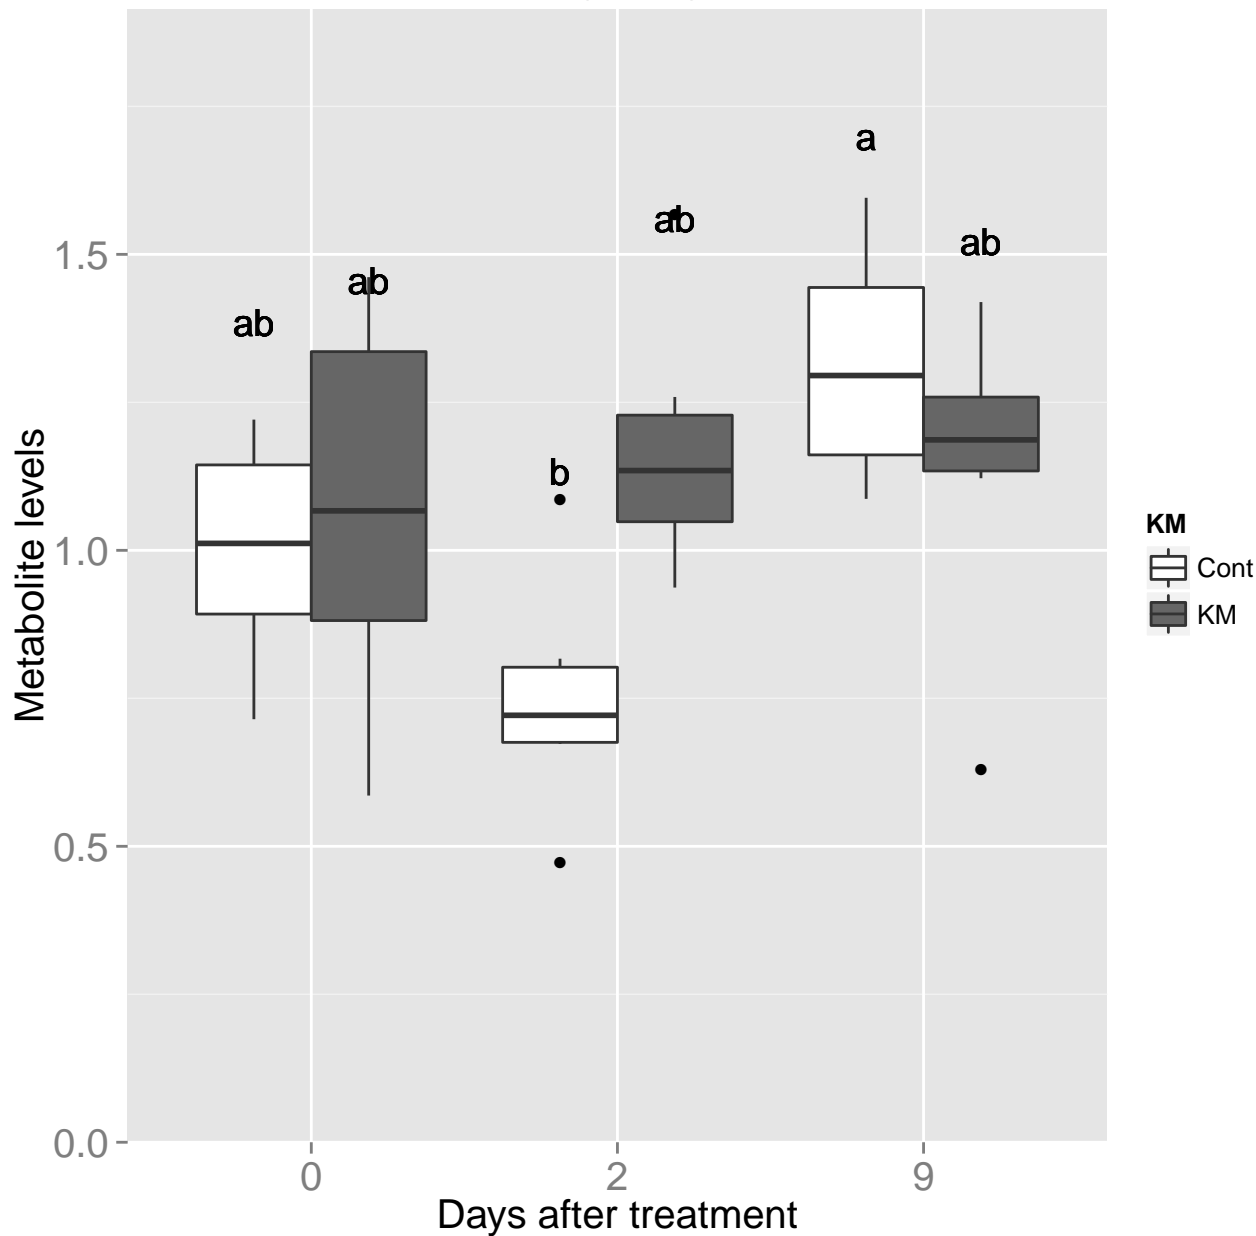

# Pyruvate

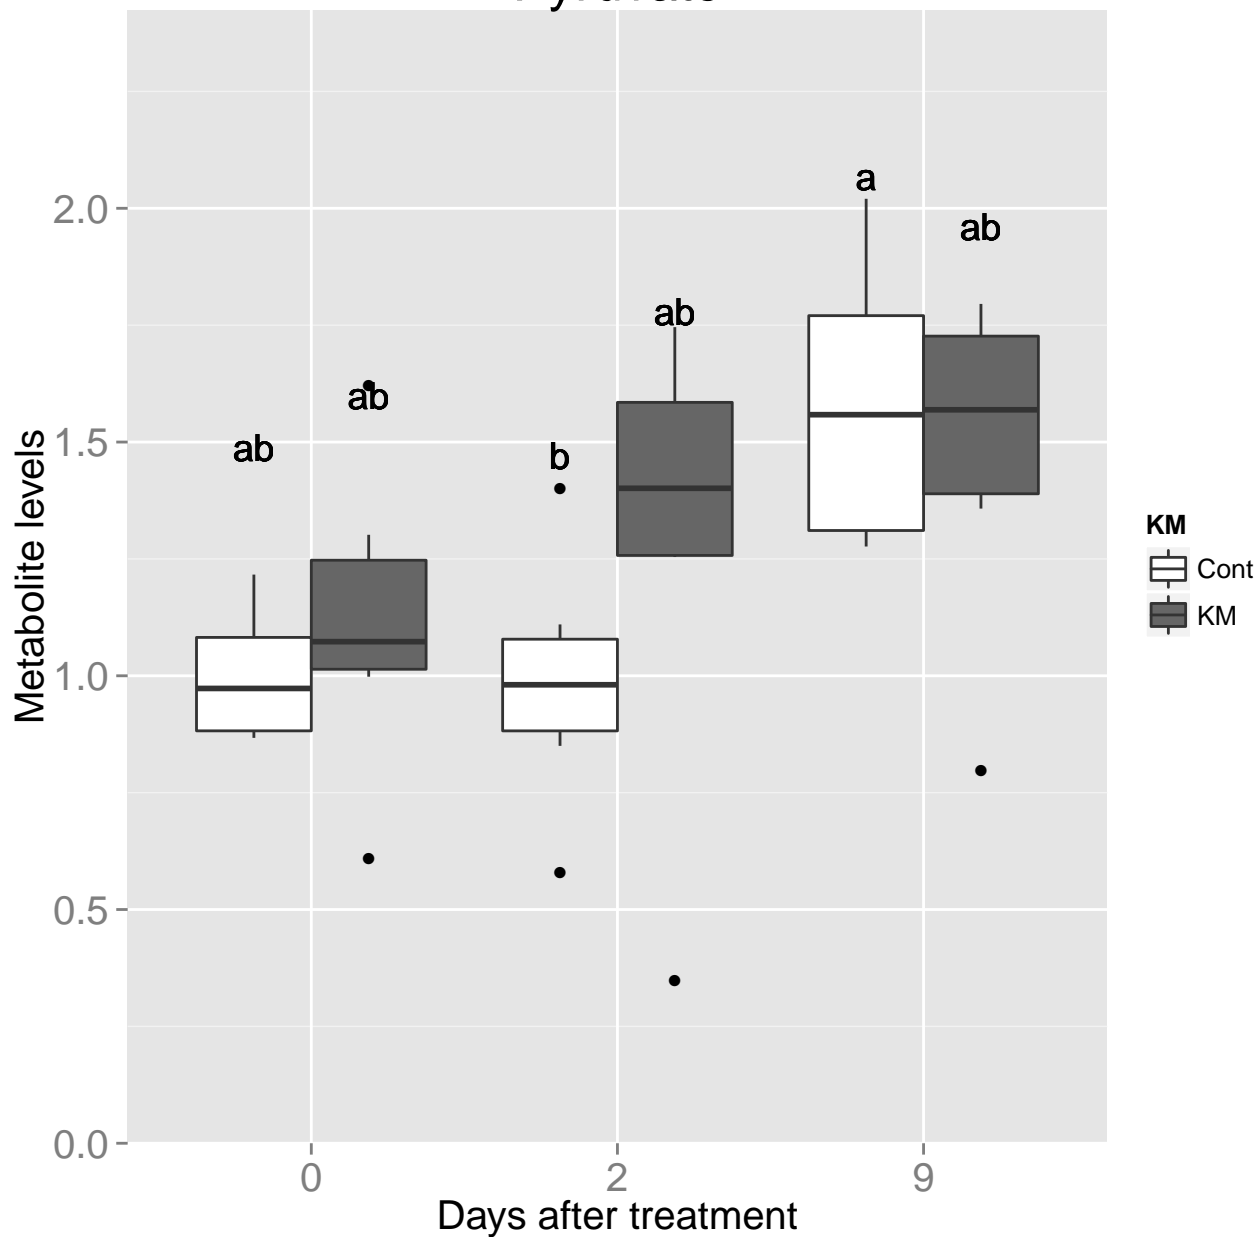

# Valine

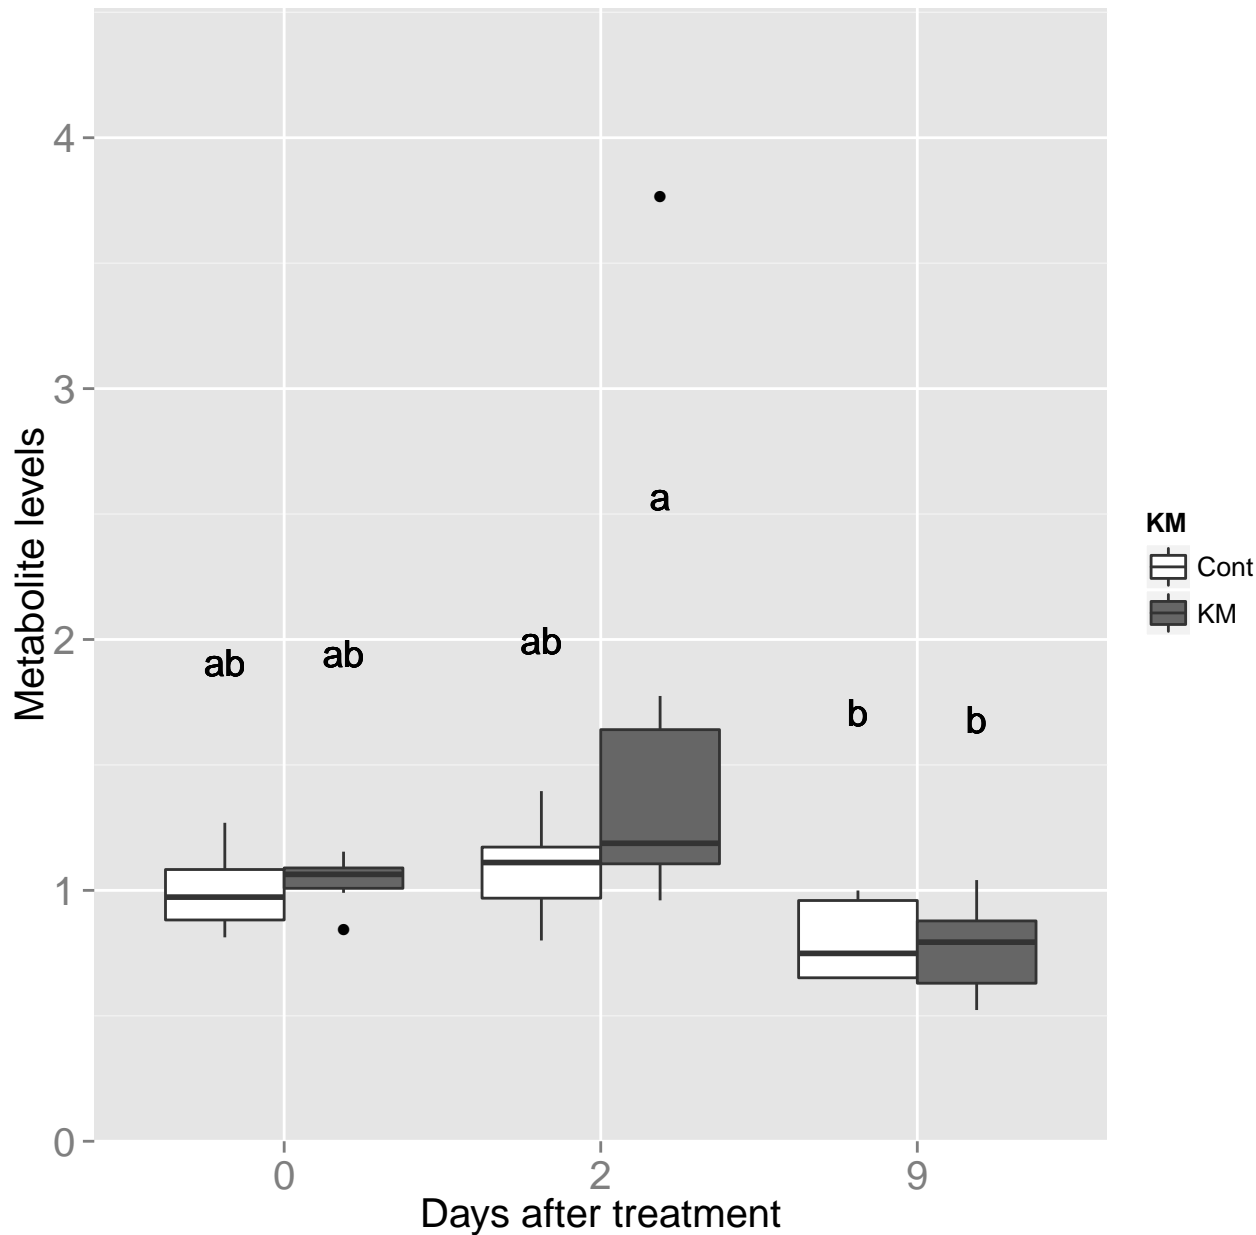

# Glycerol

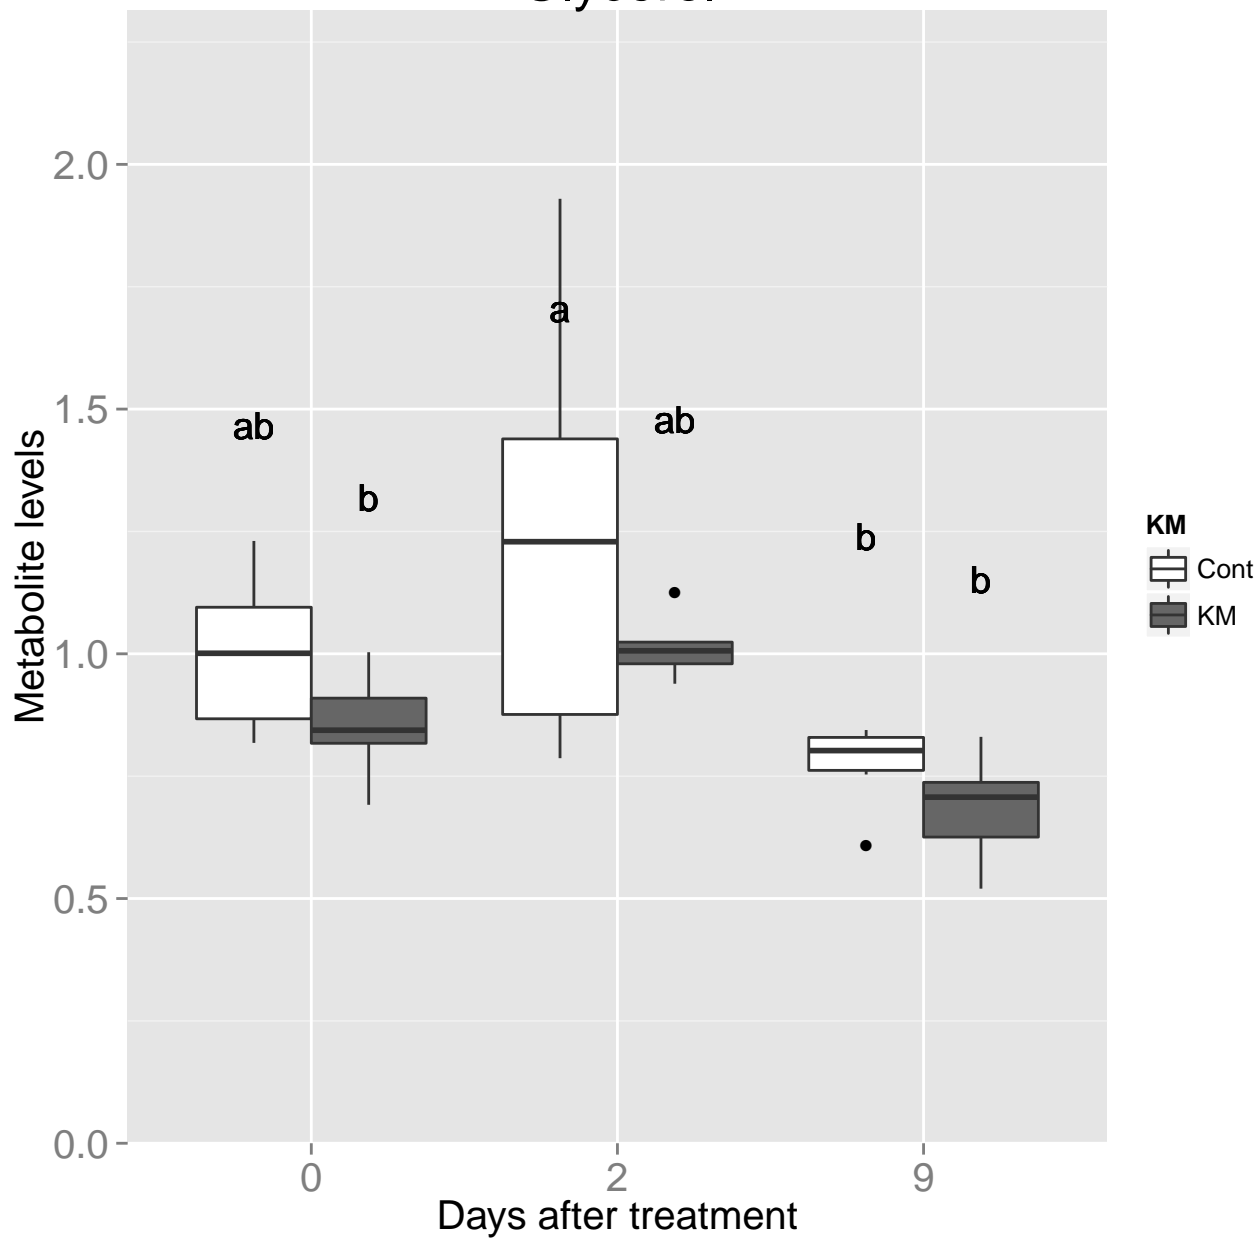

# Malonate

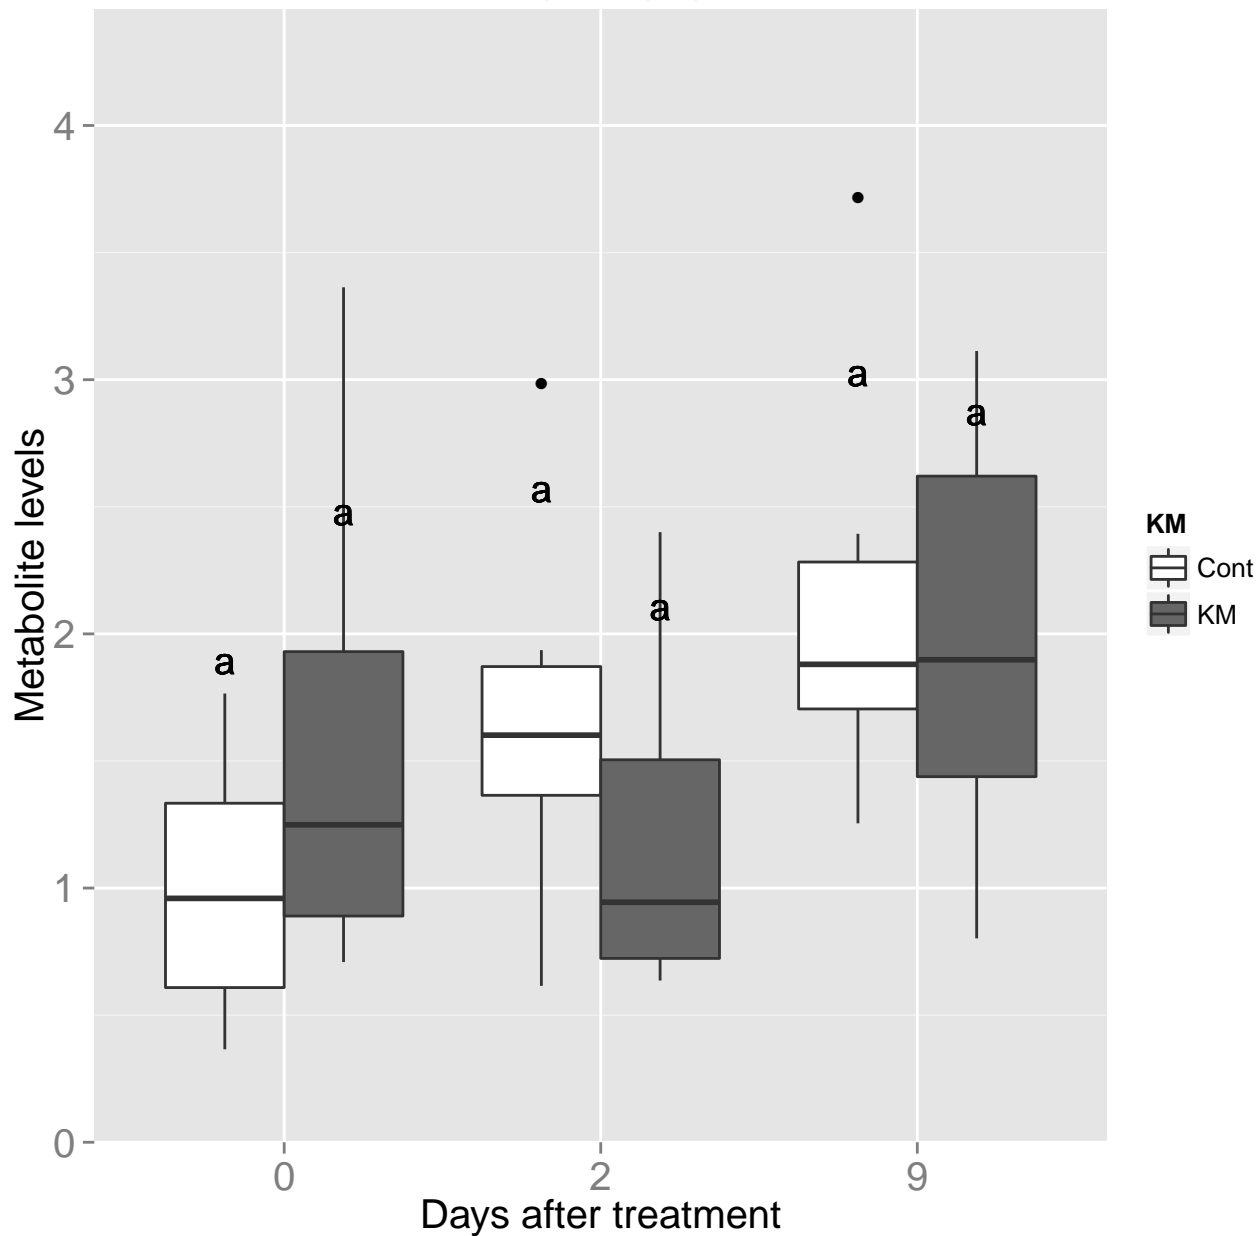

# Isoleucine

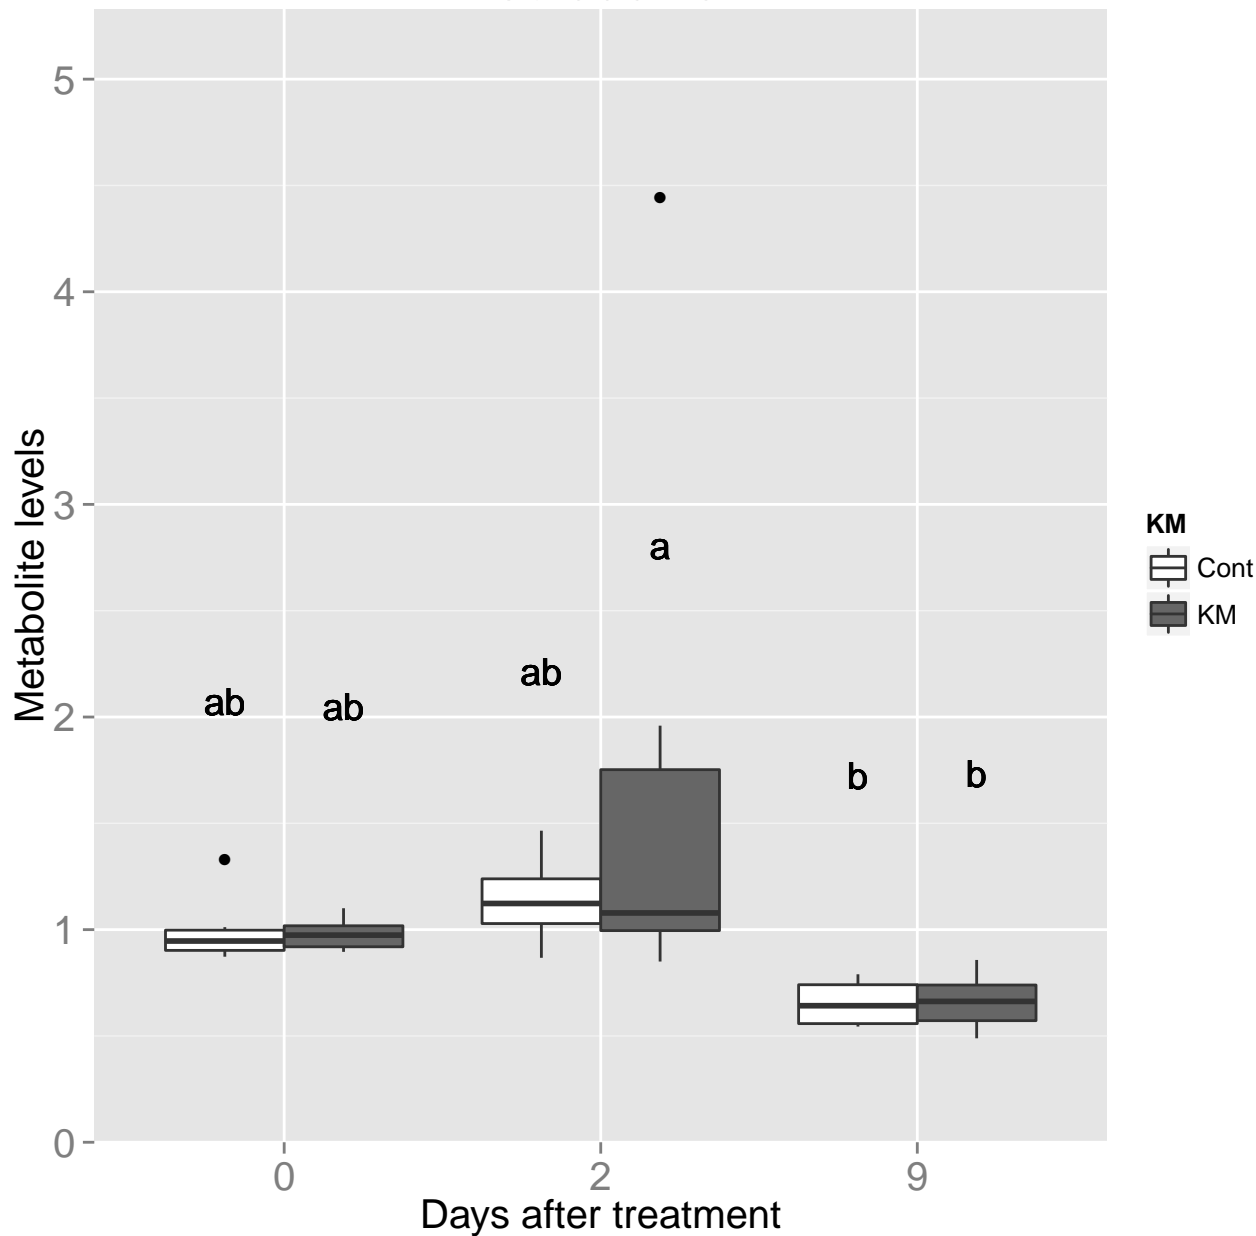

# Glycine

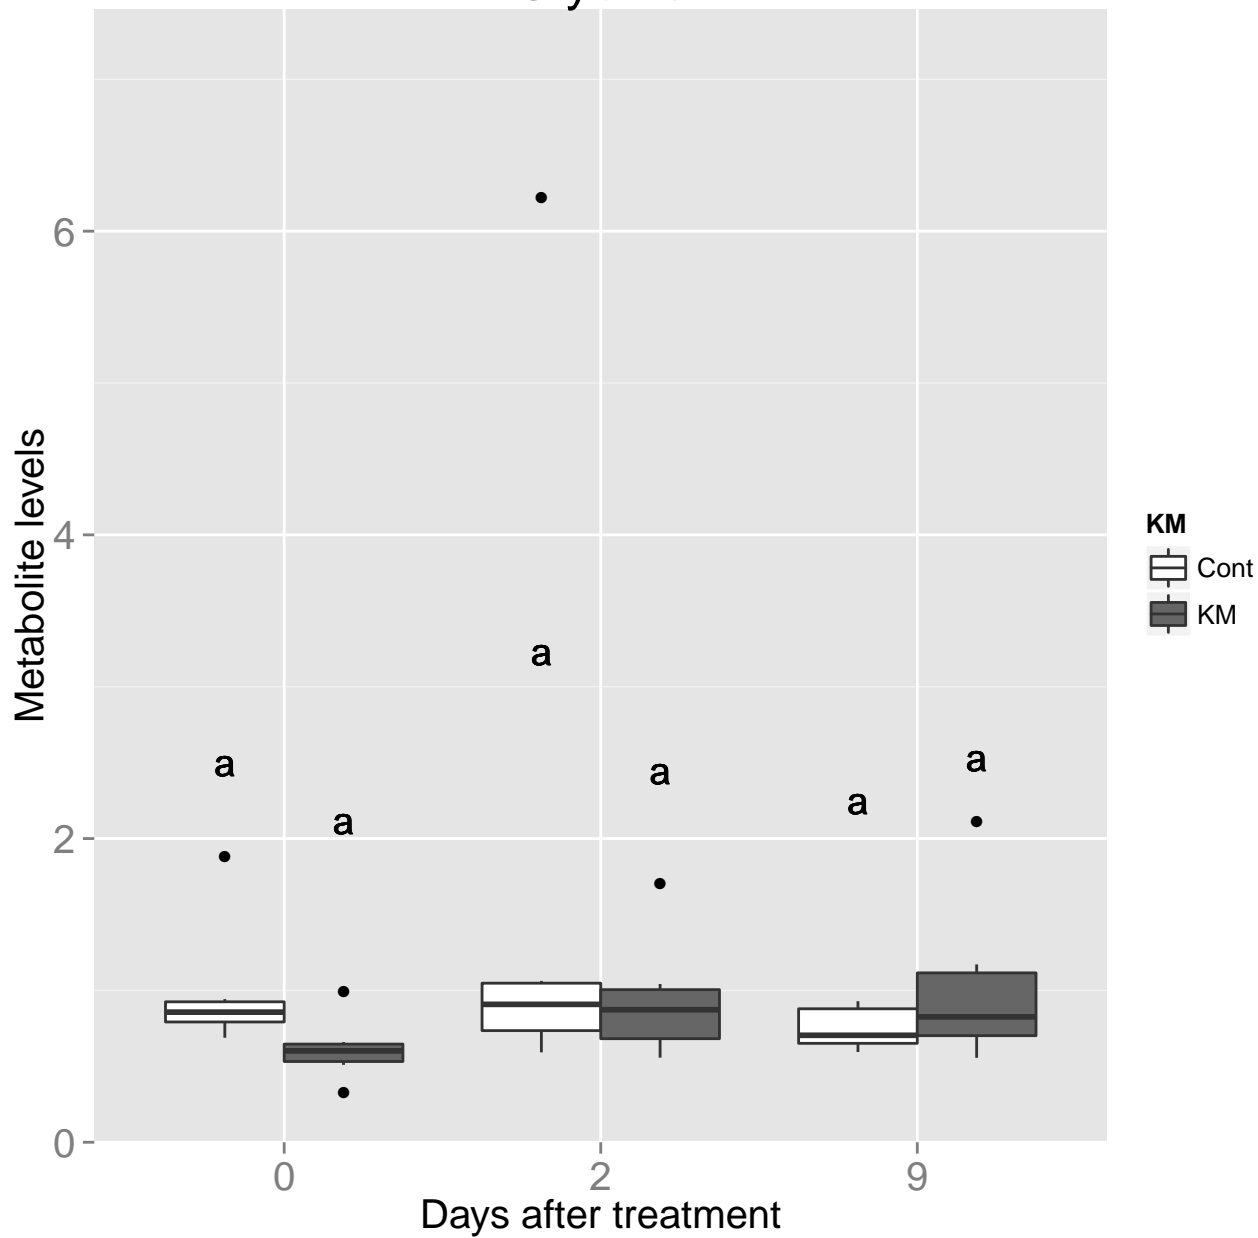

# Phosphate

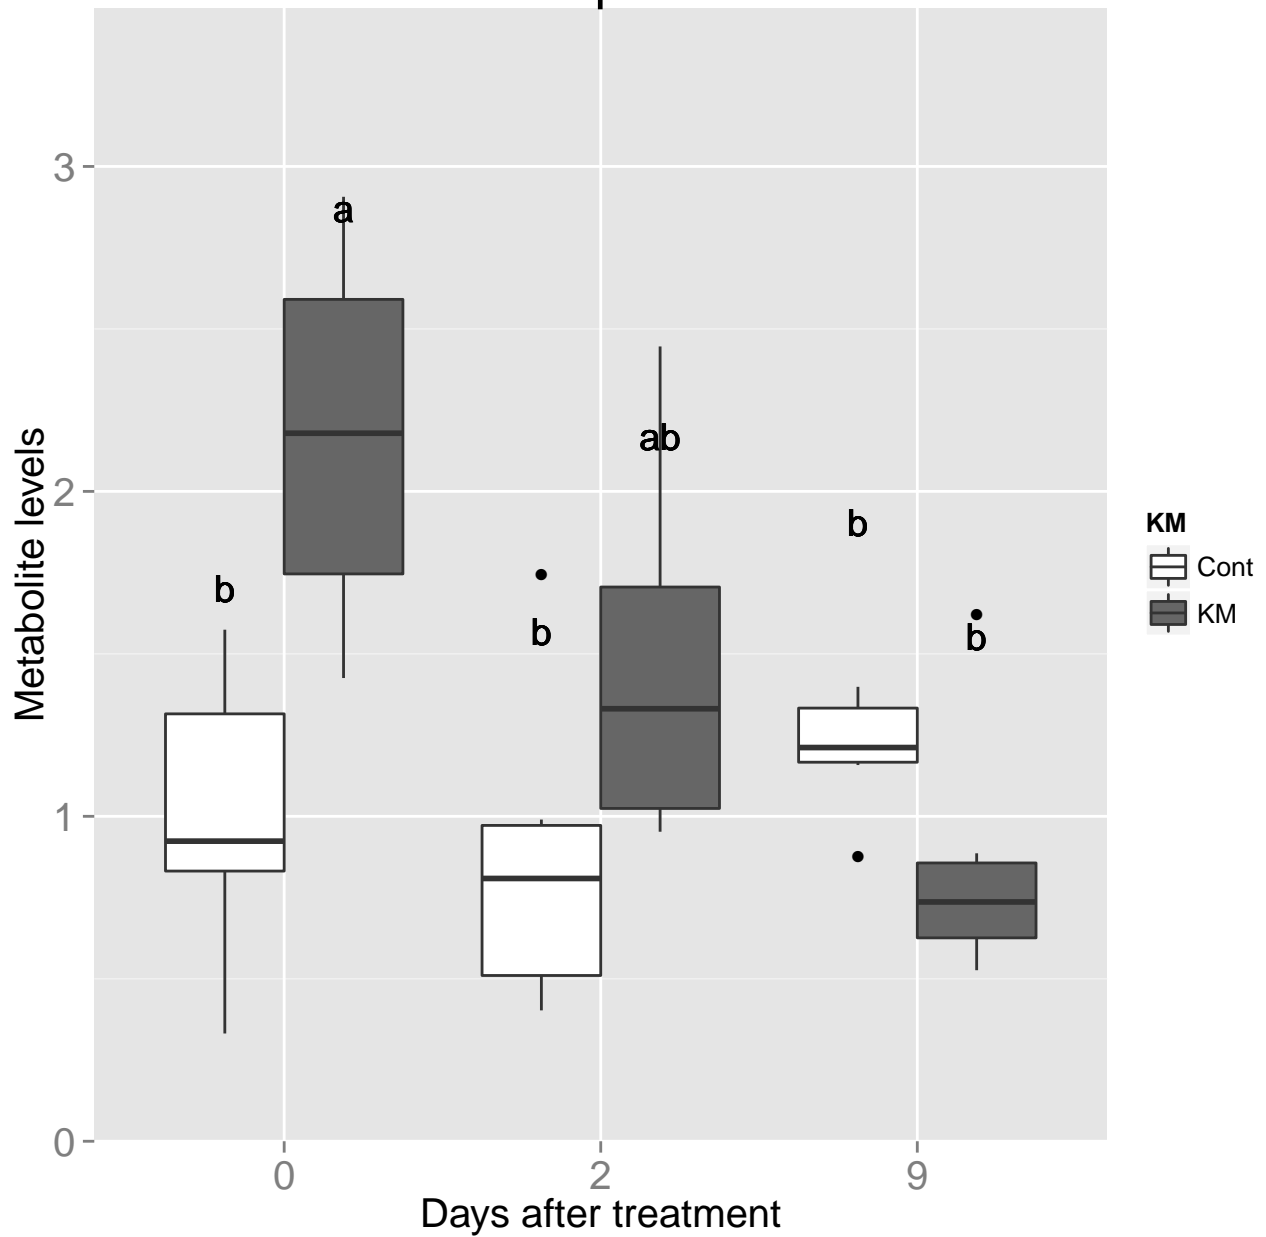



# Proline

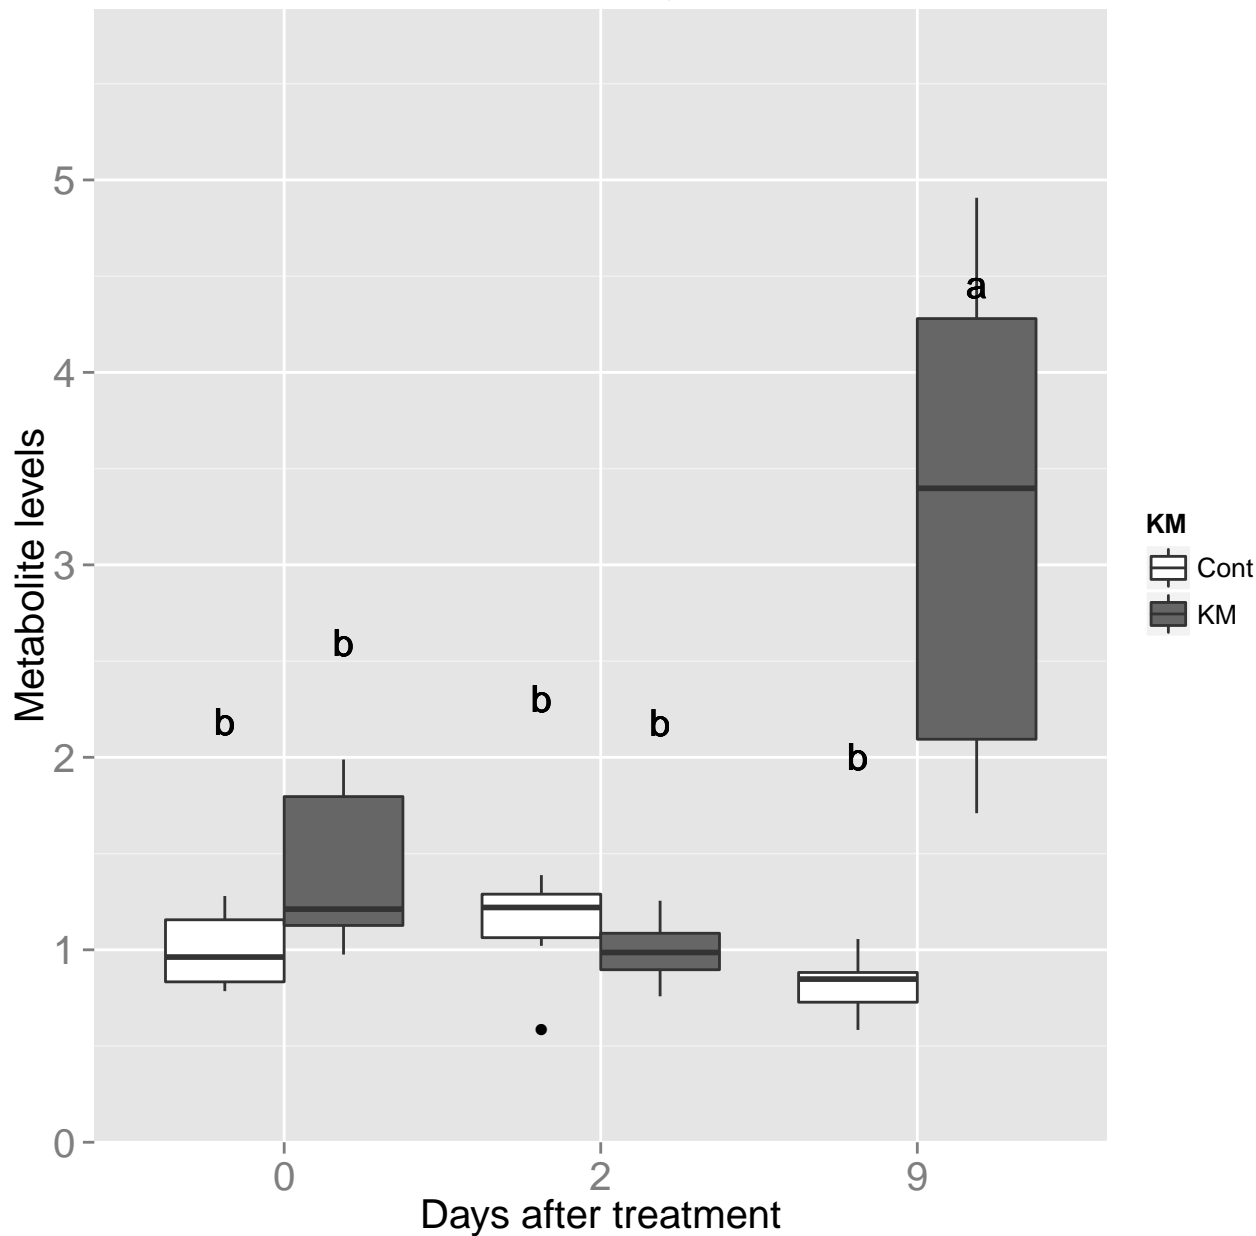

# Glycerate

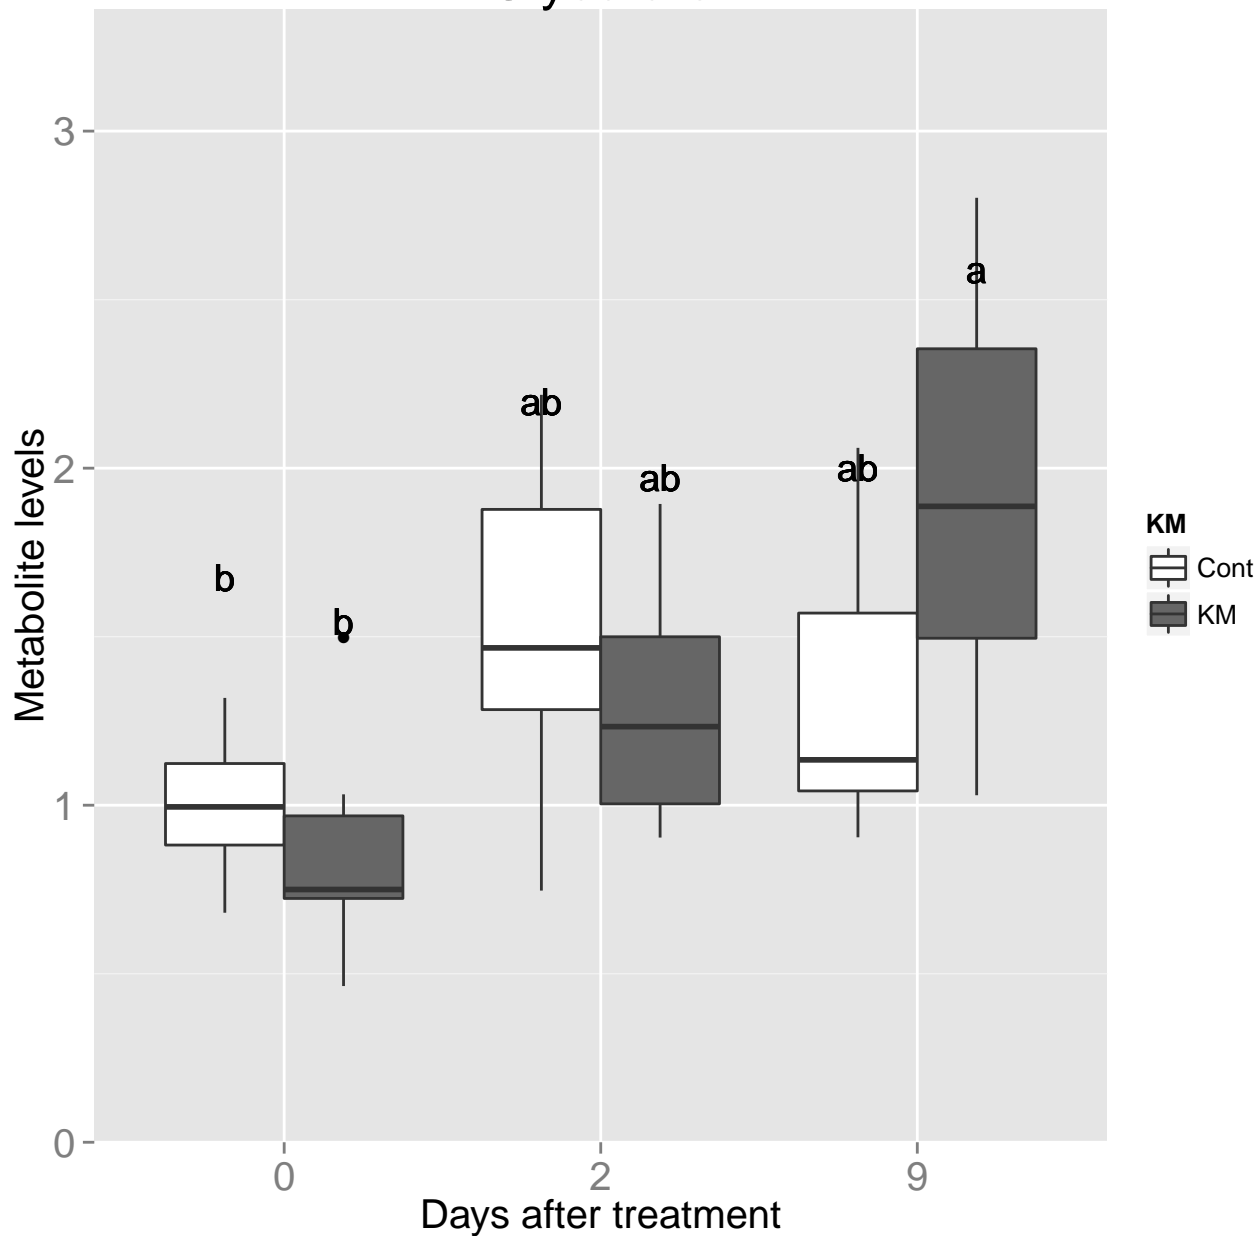

# Benzoate

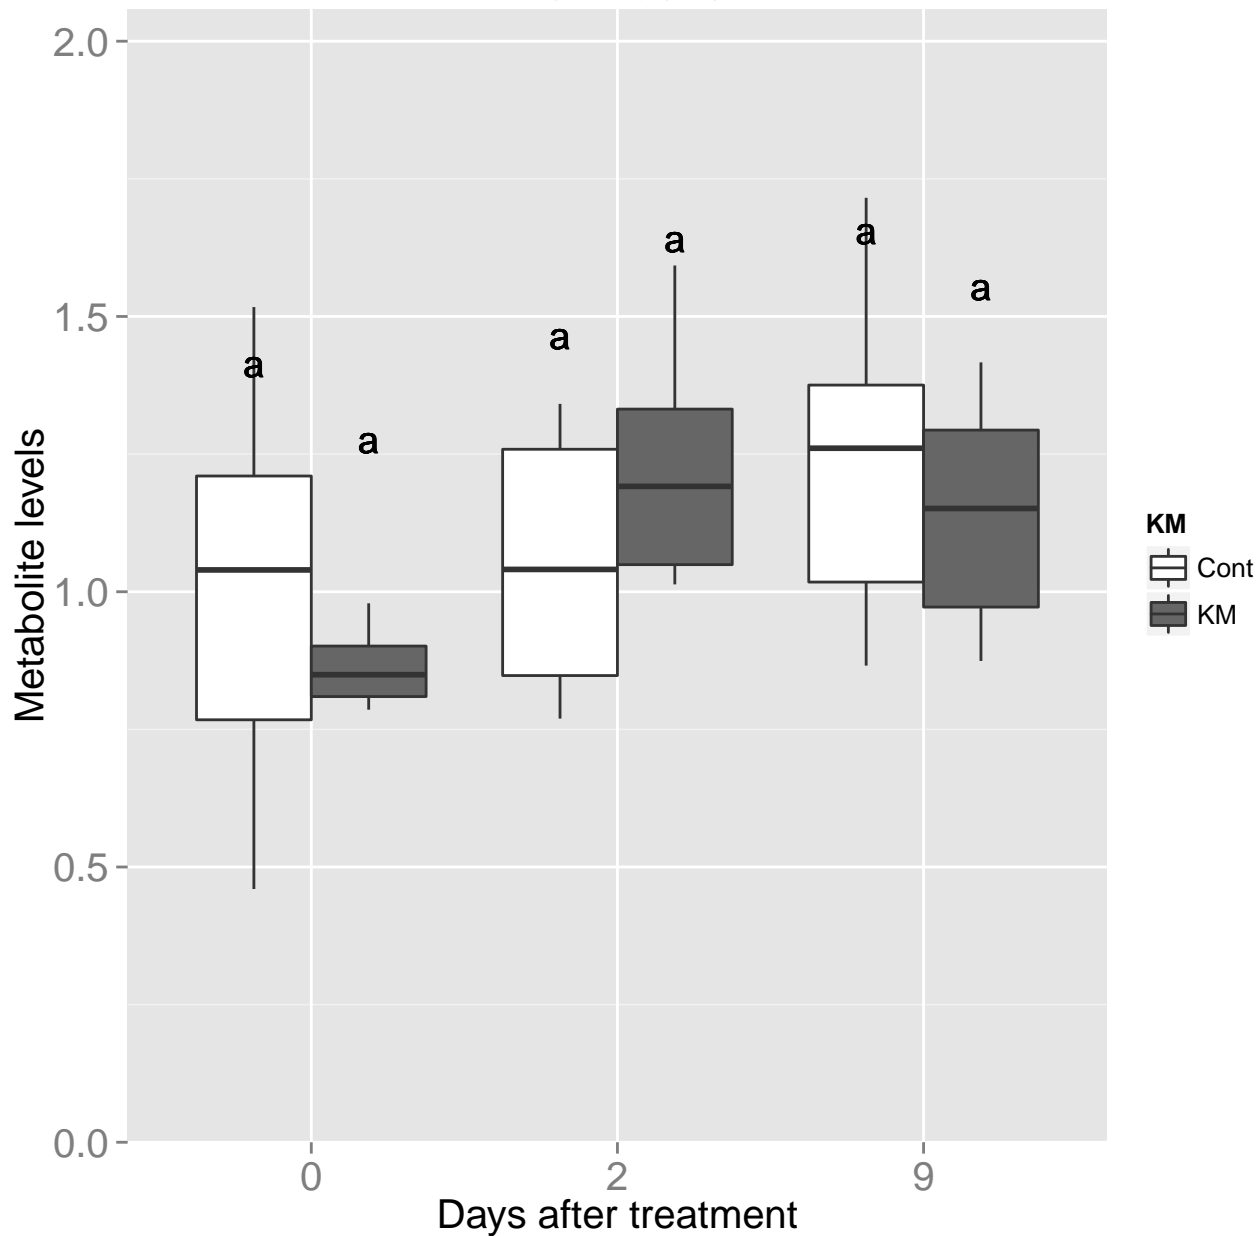

# Serine

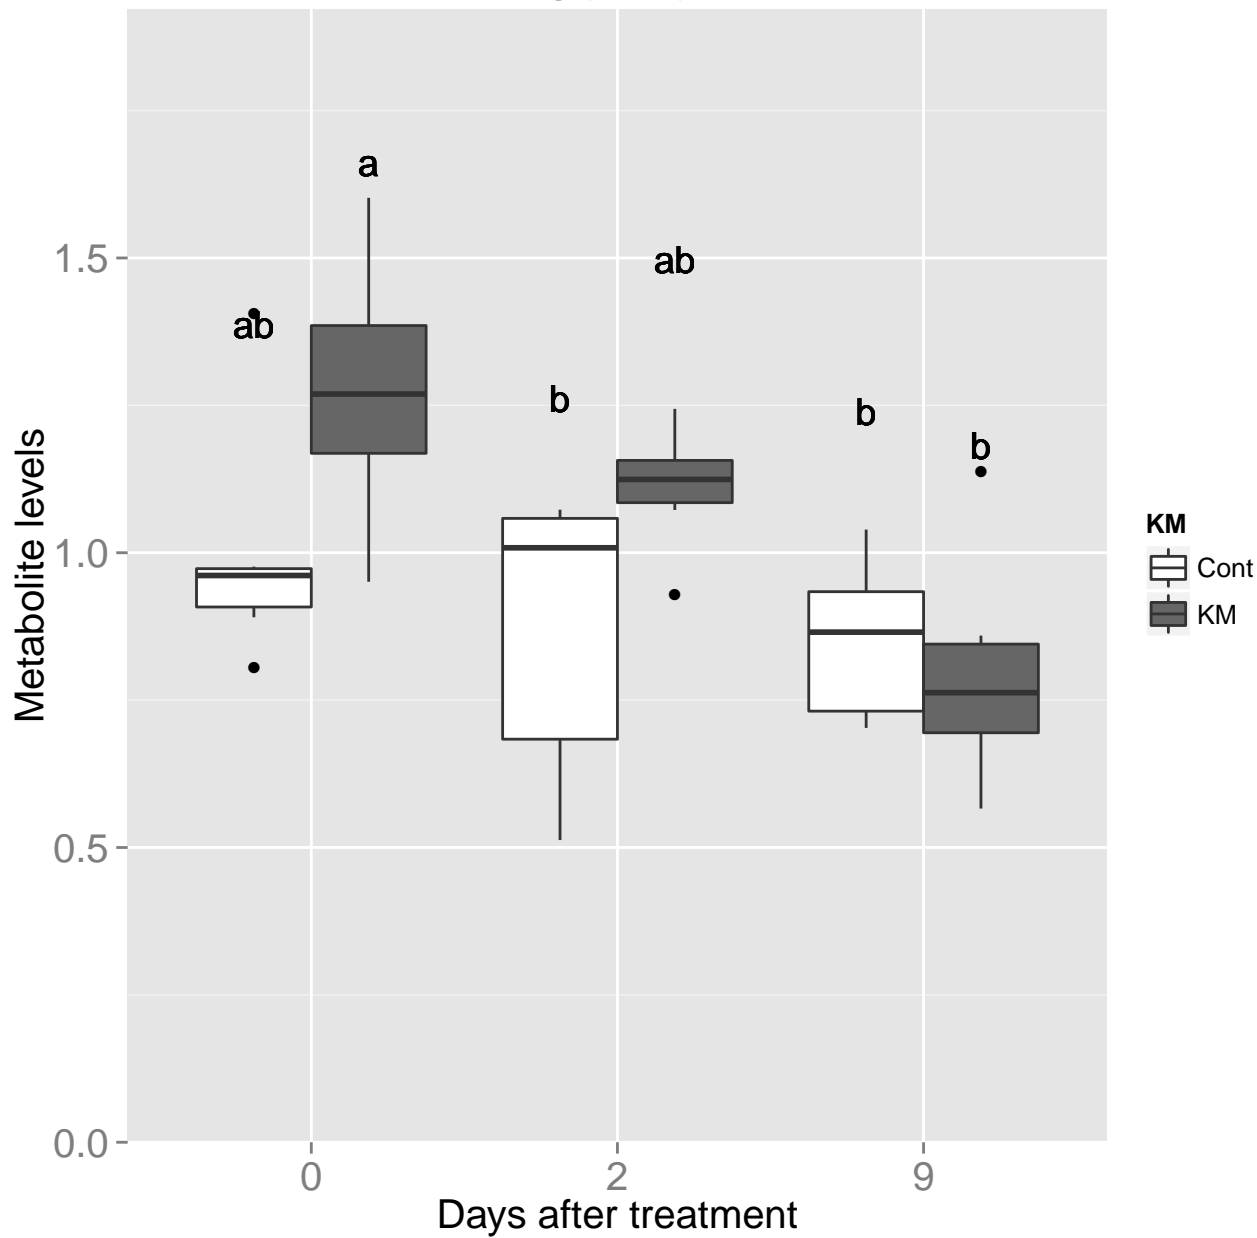

# Succinate

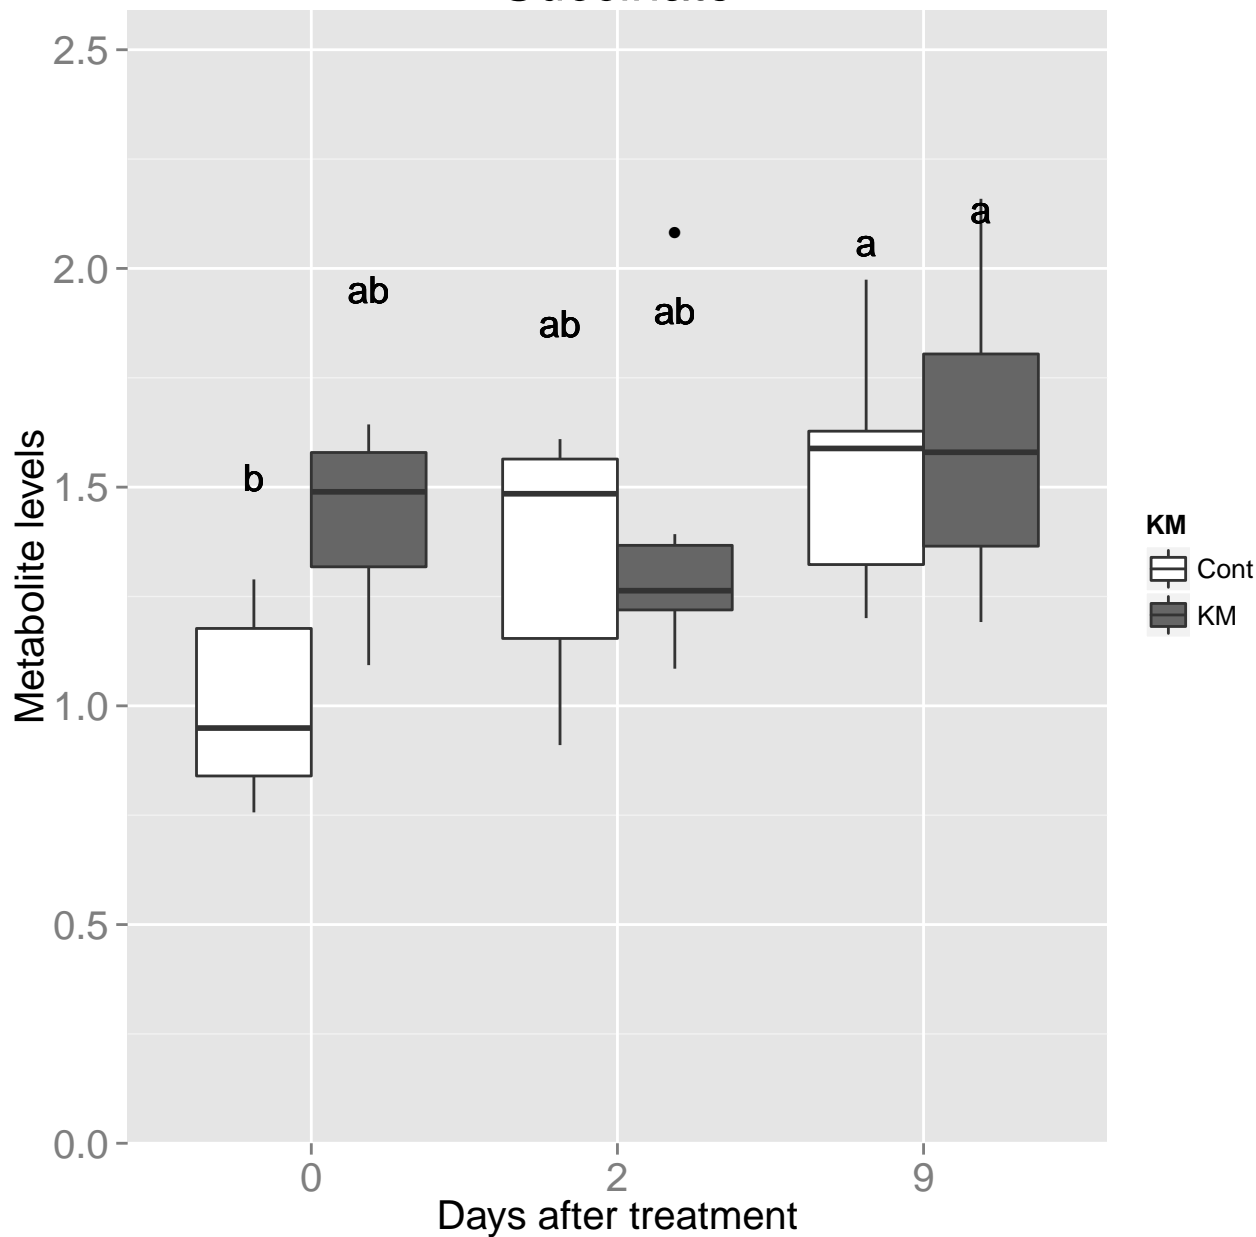

# Threonine

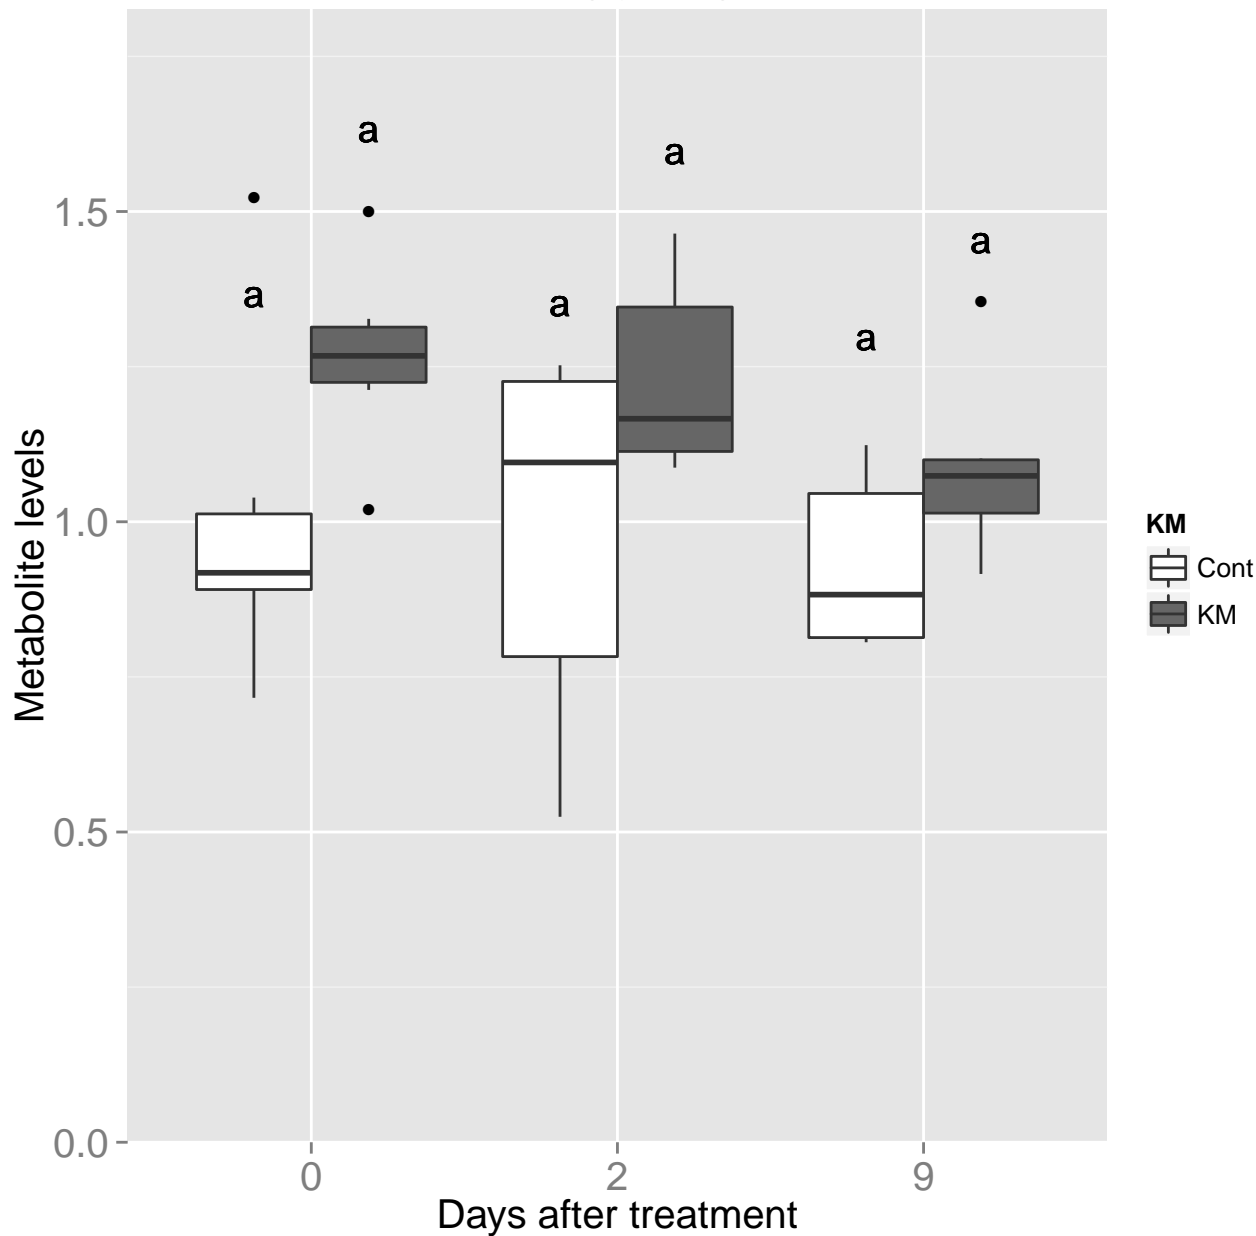

# Nicotinate

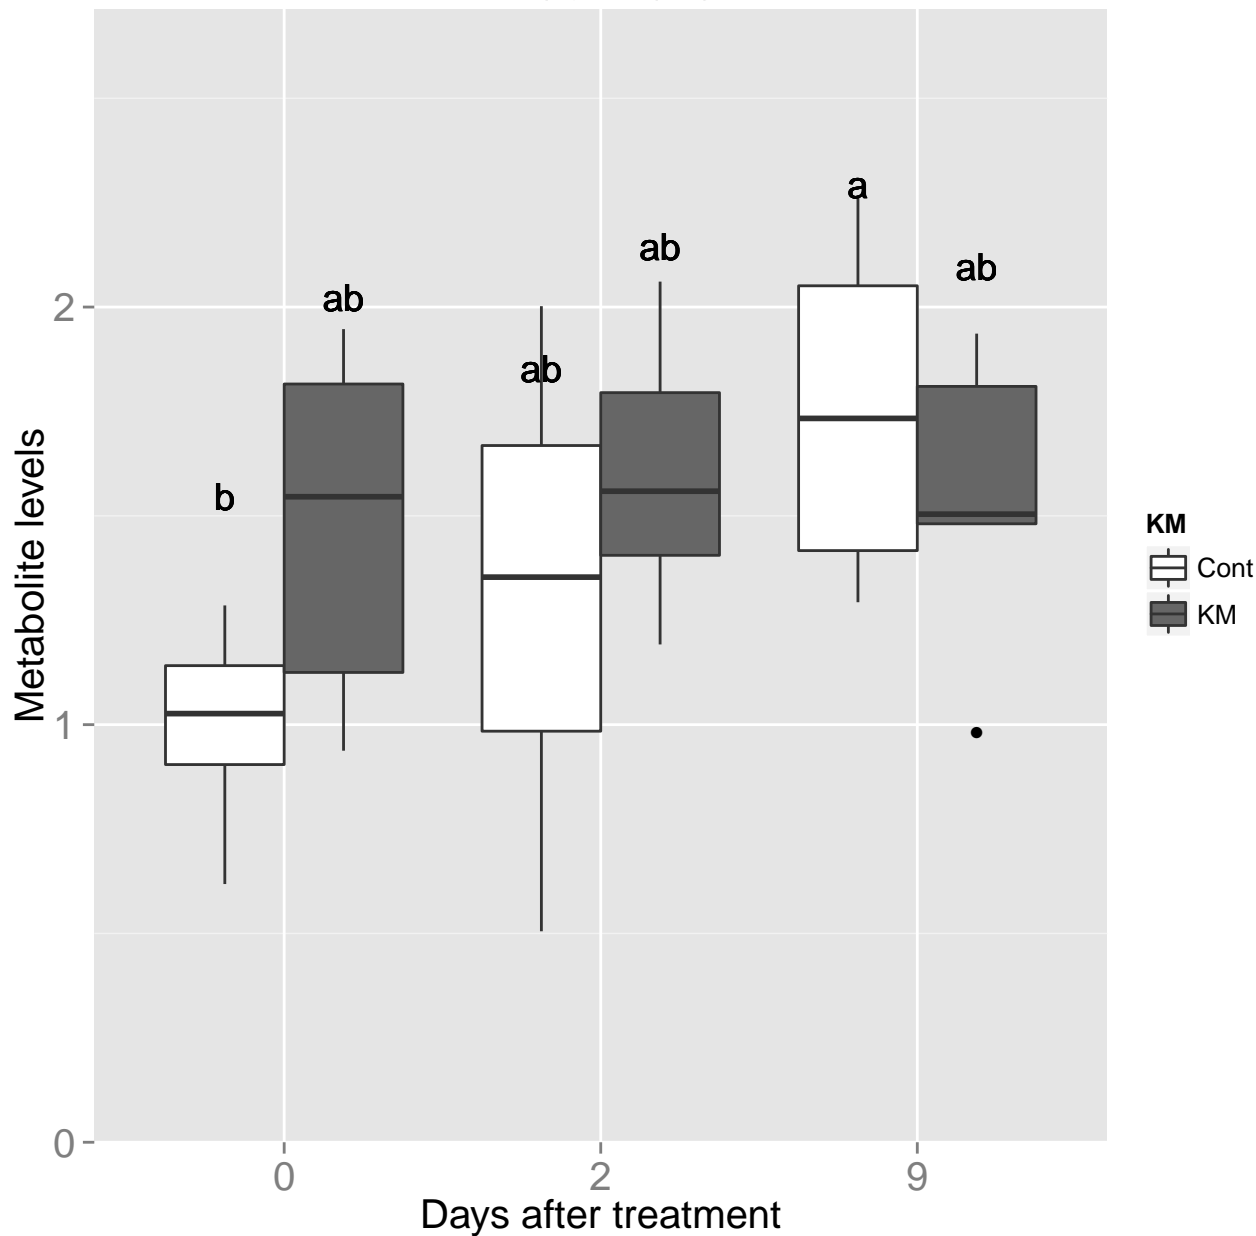

# Uracil

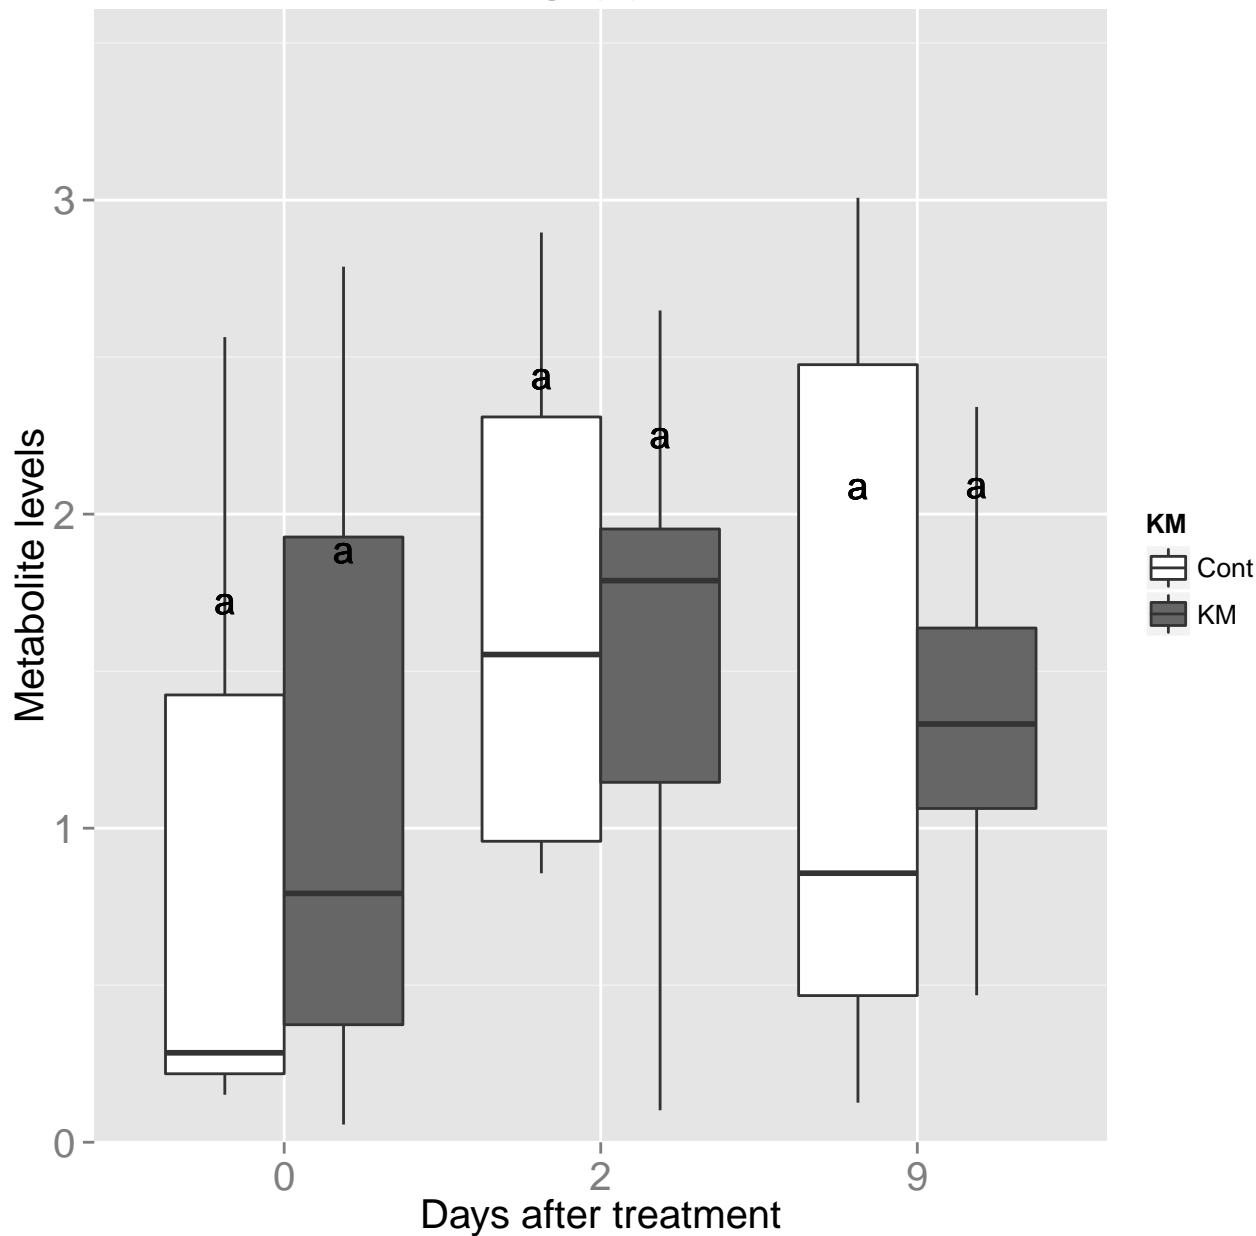



# beta.alanine

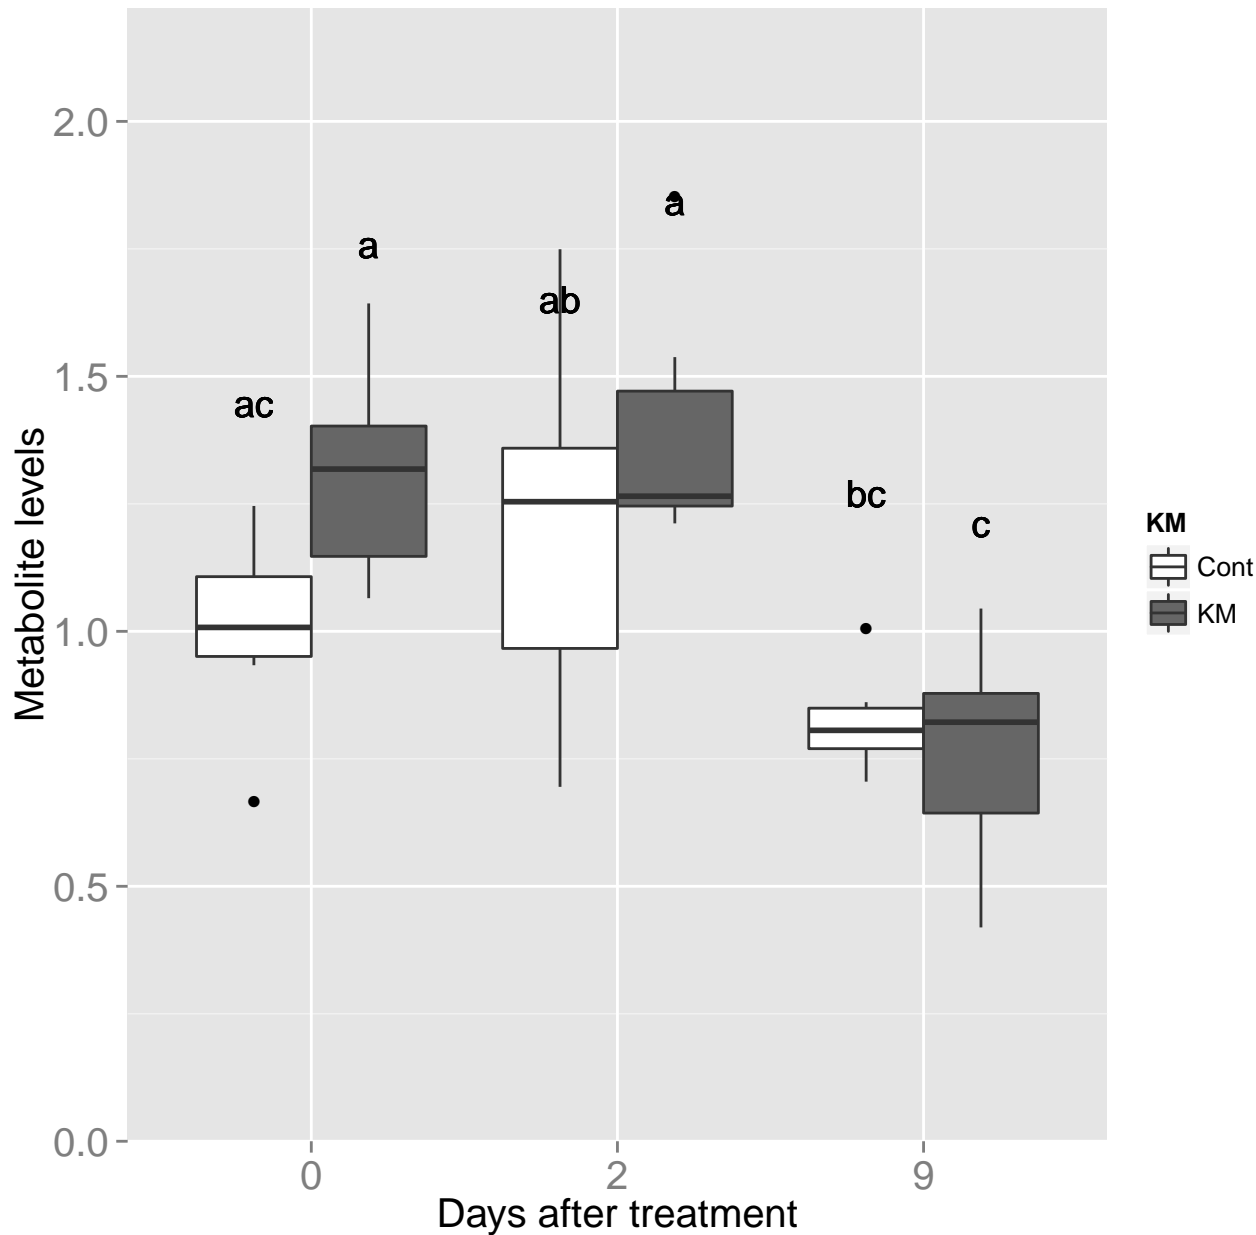

# Erythritol

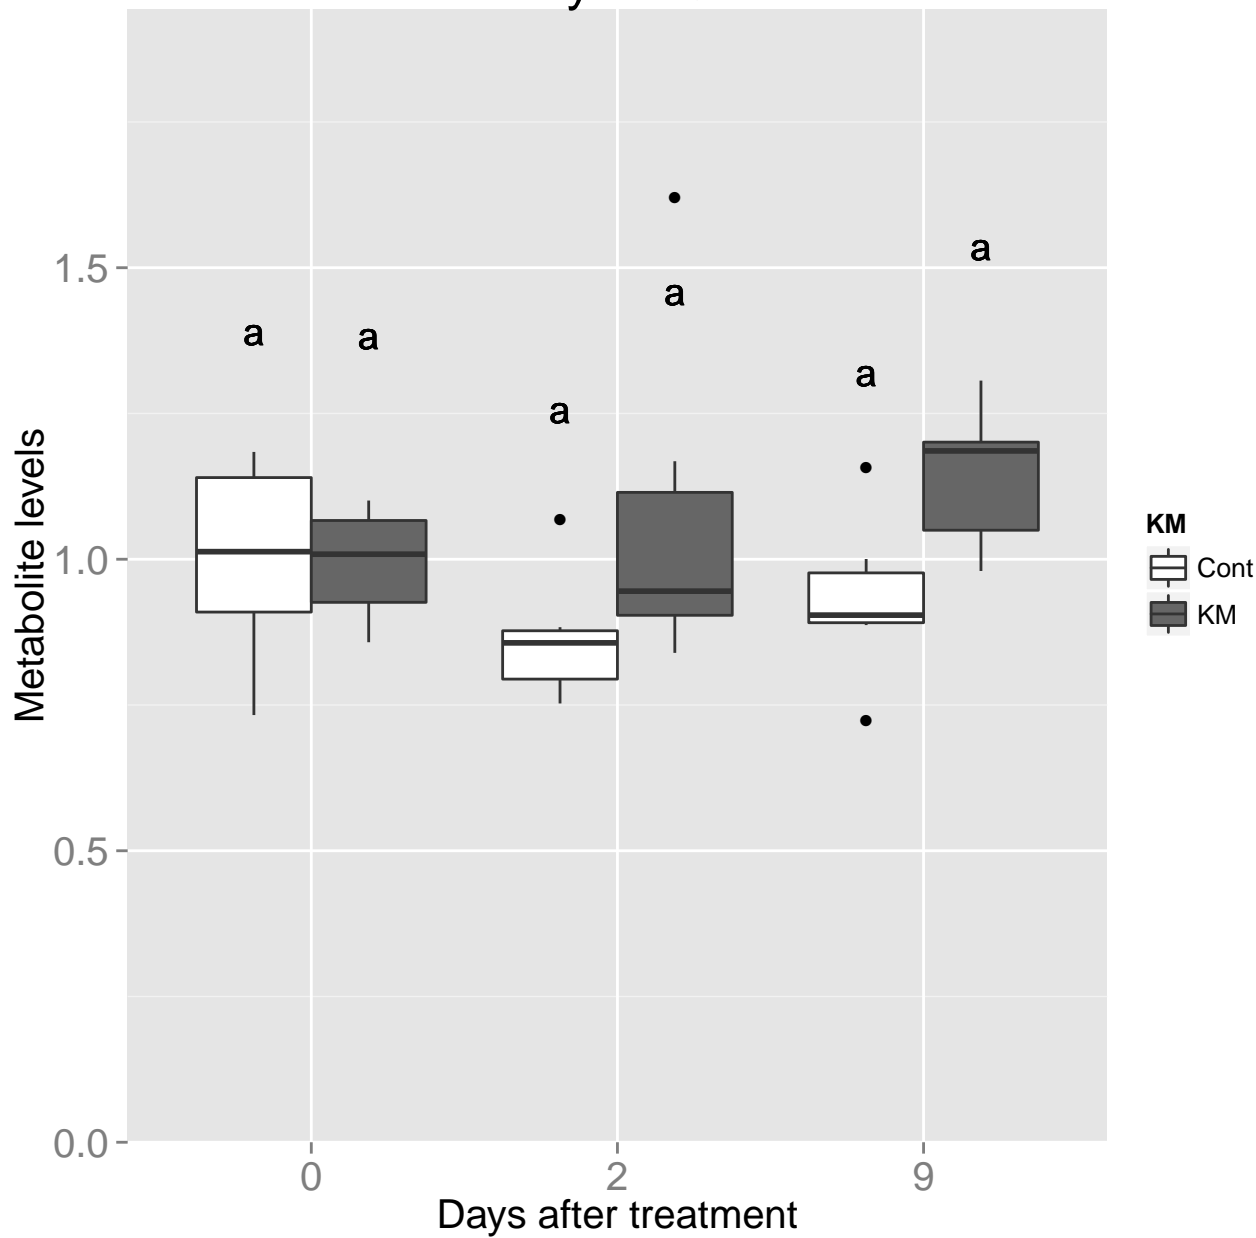

# Malate

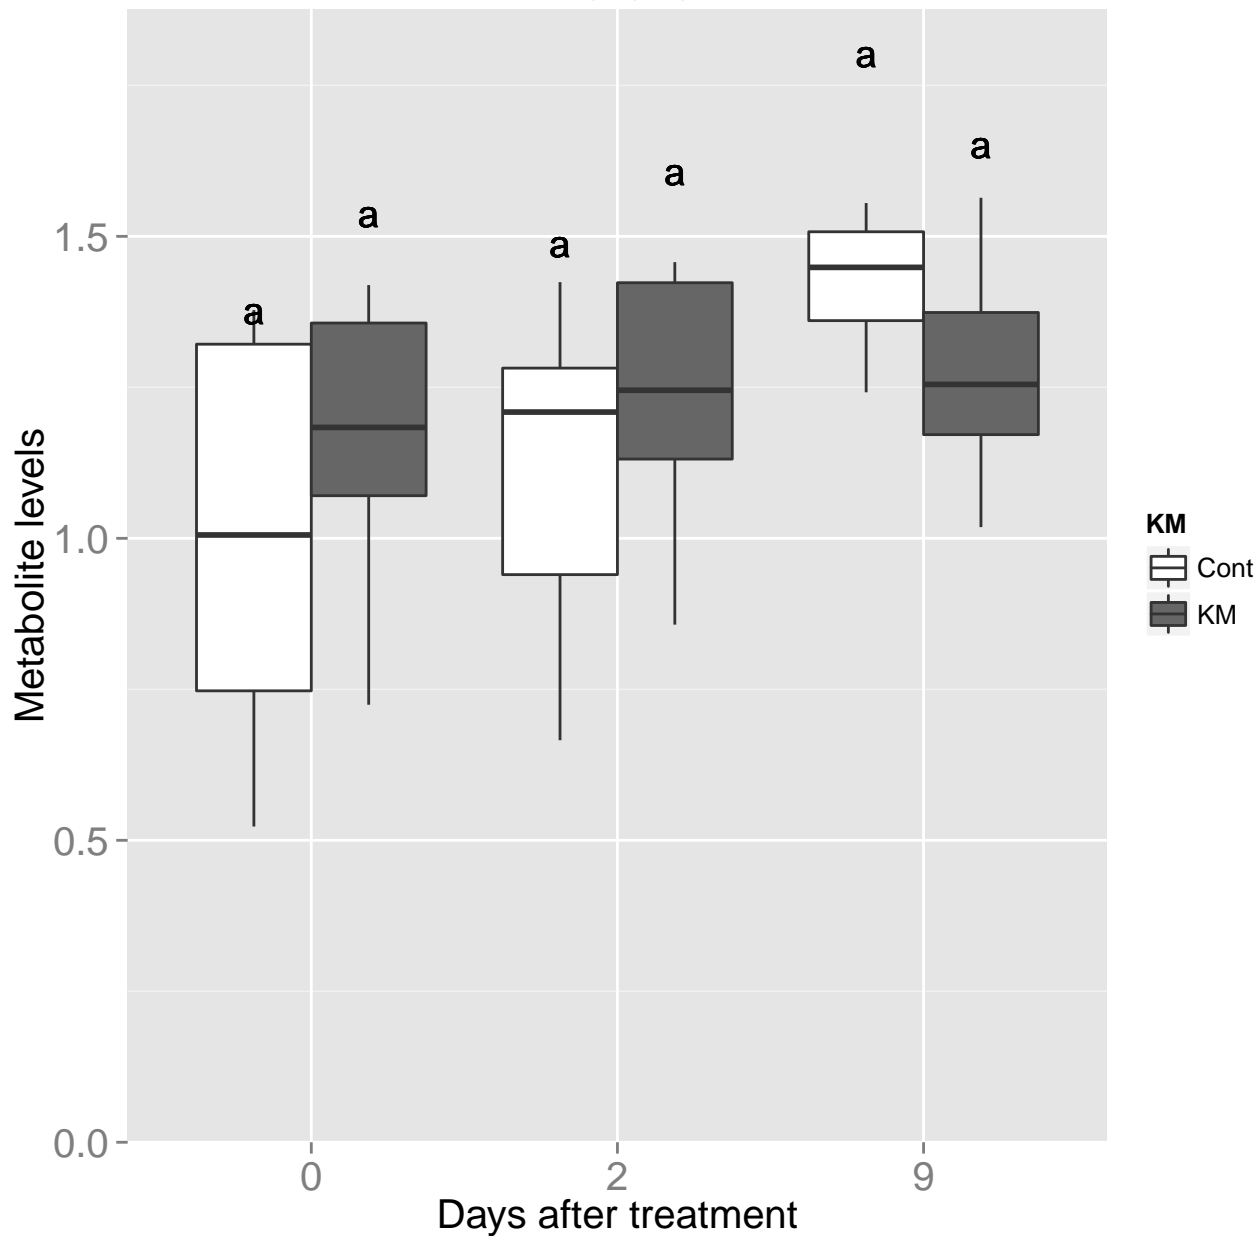

# Erythronate

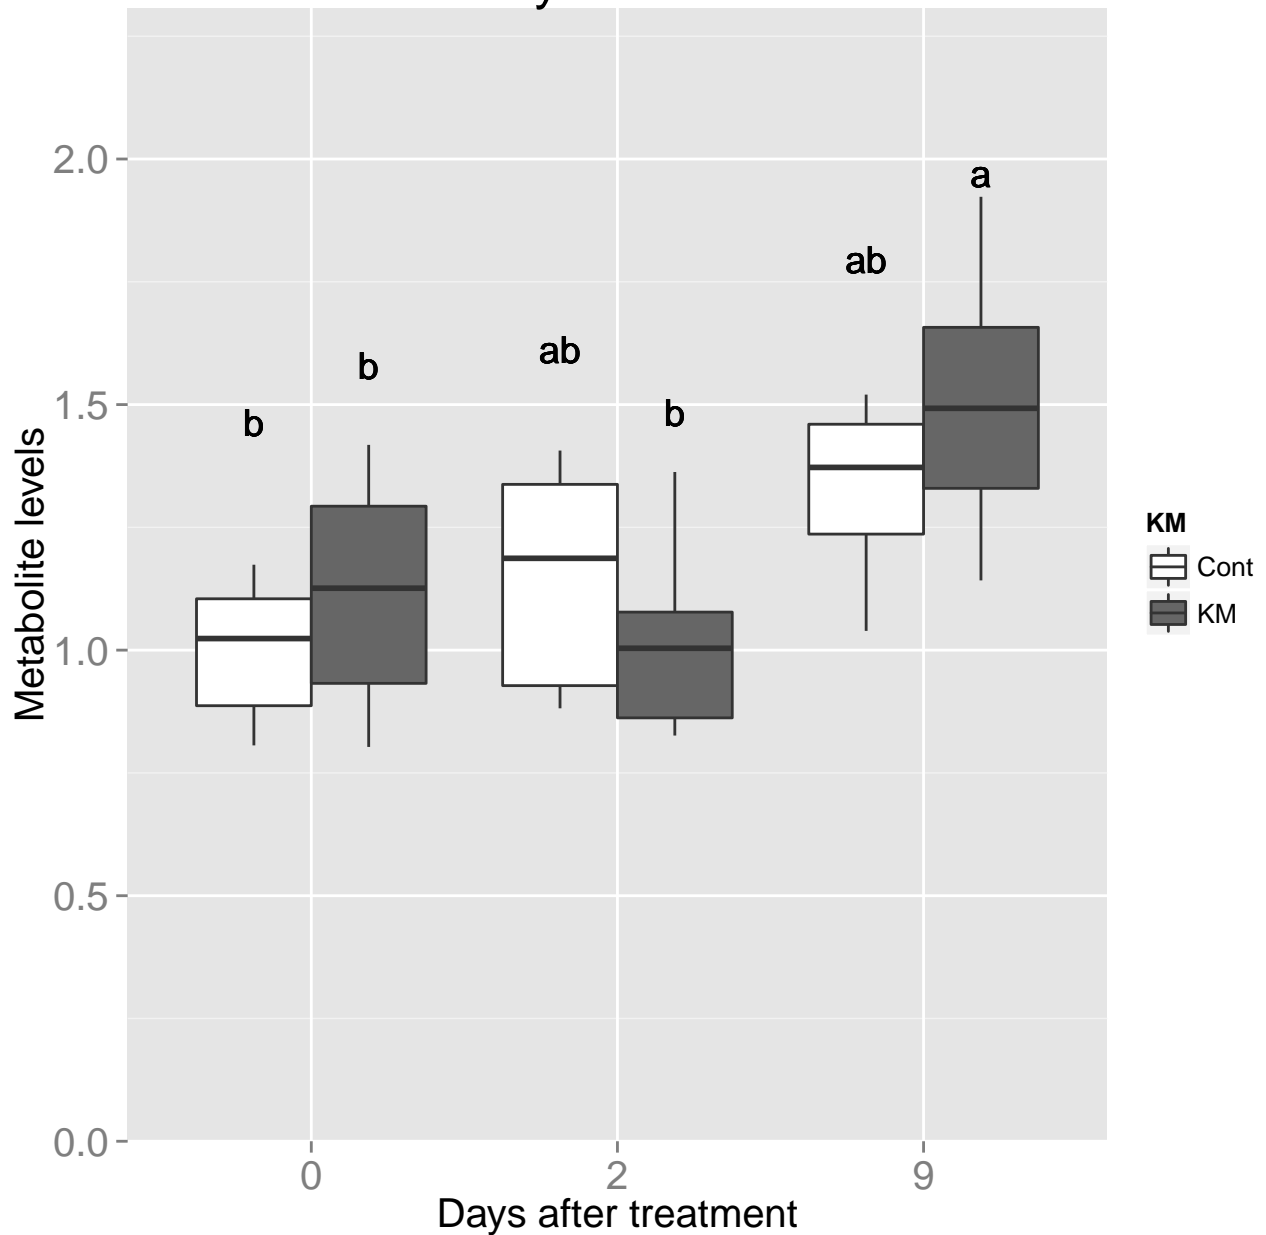

# GABA

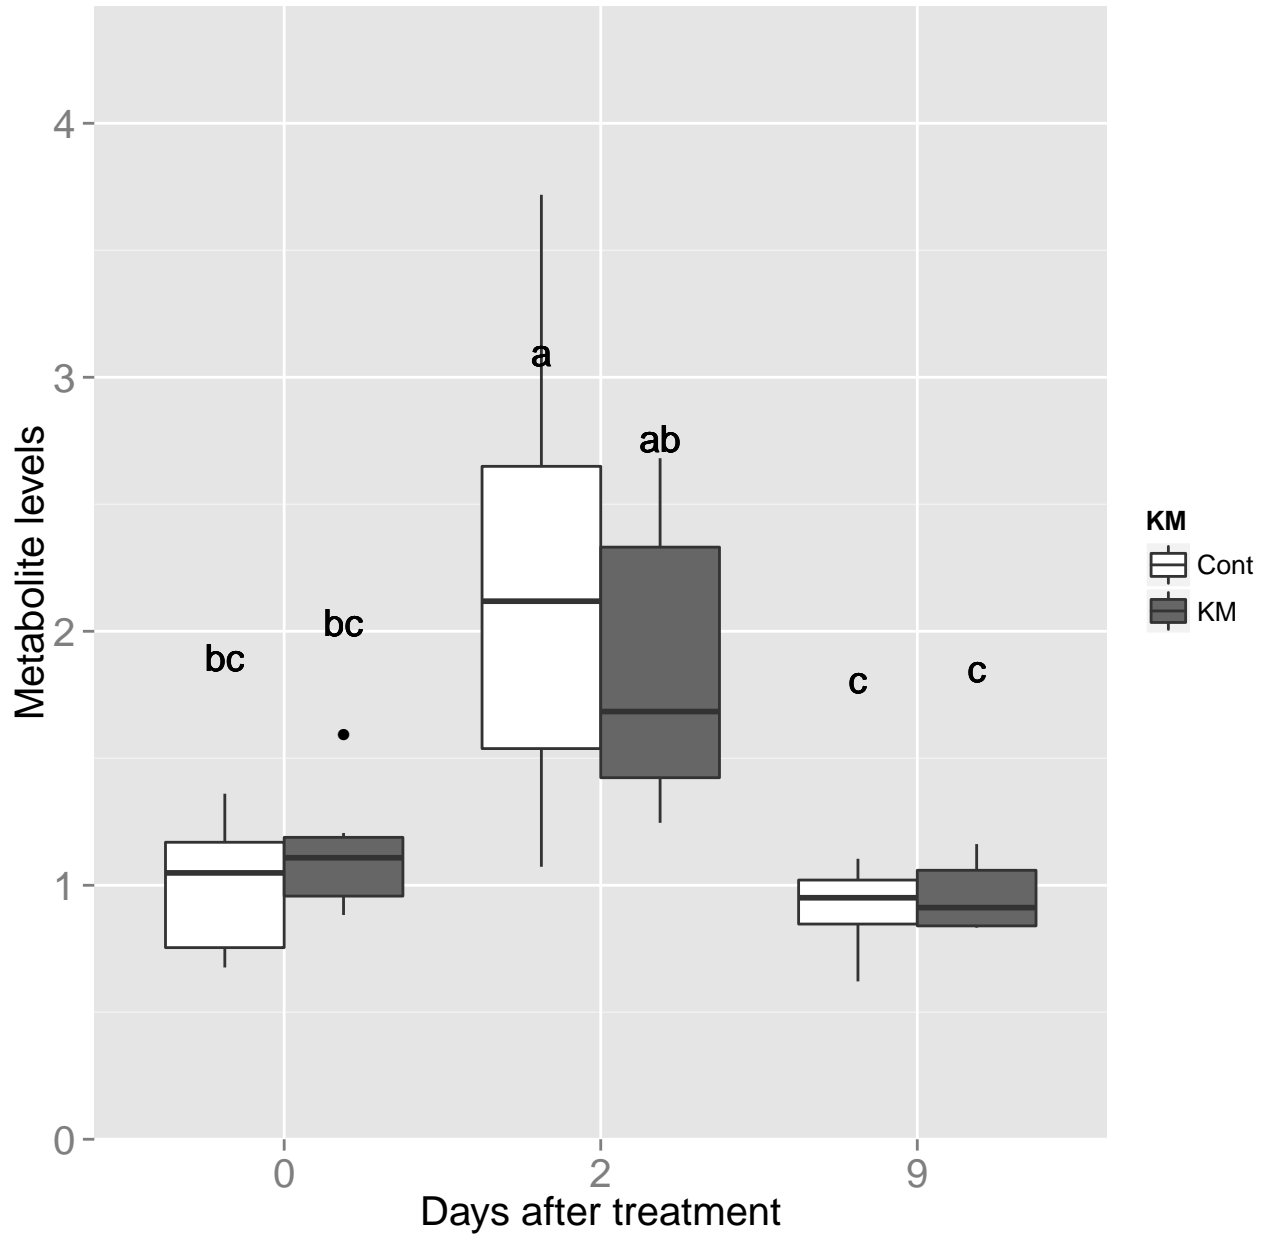

# Aspartate

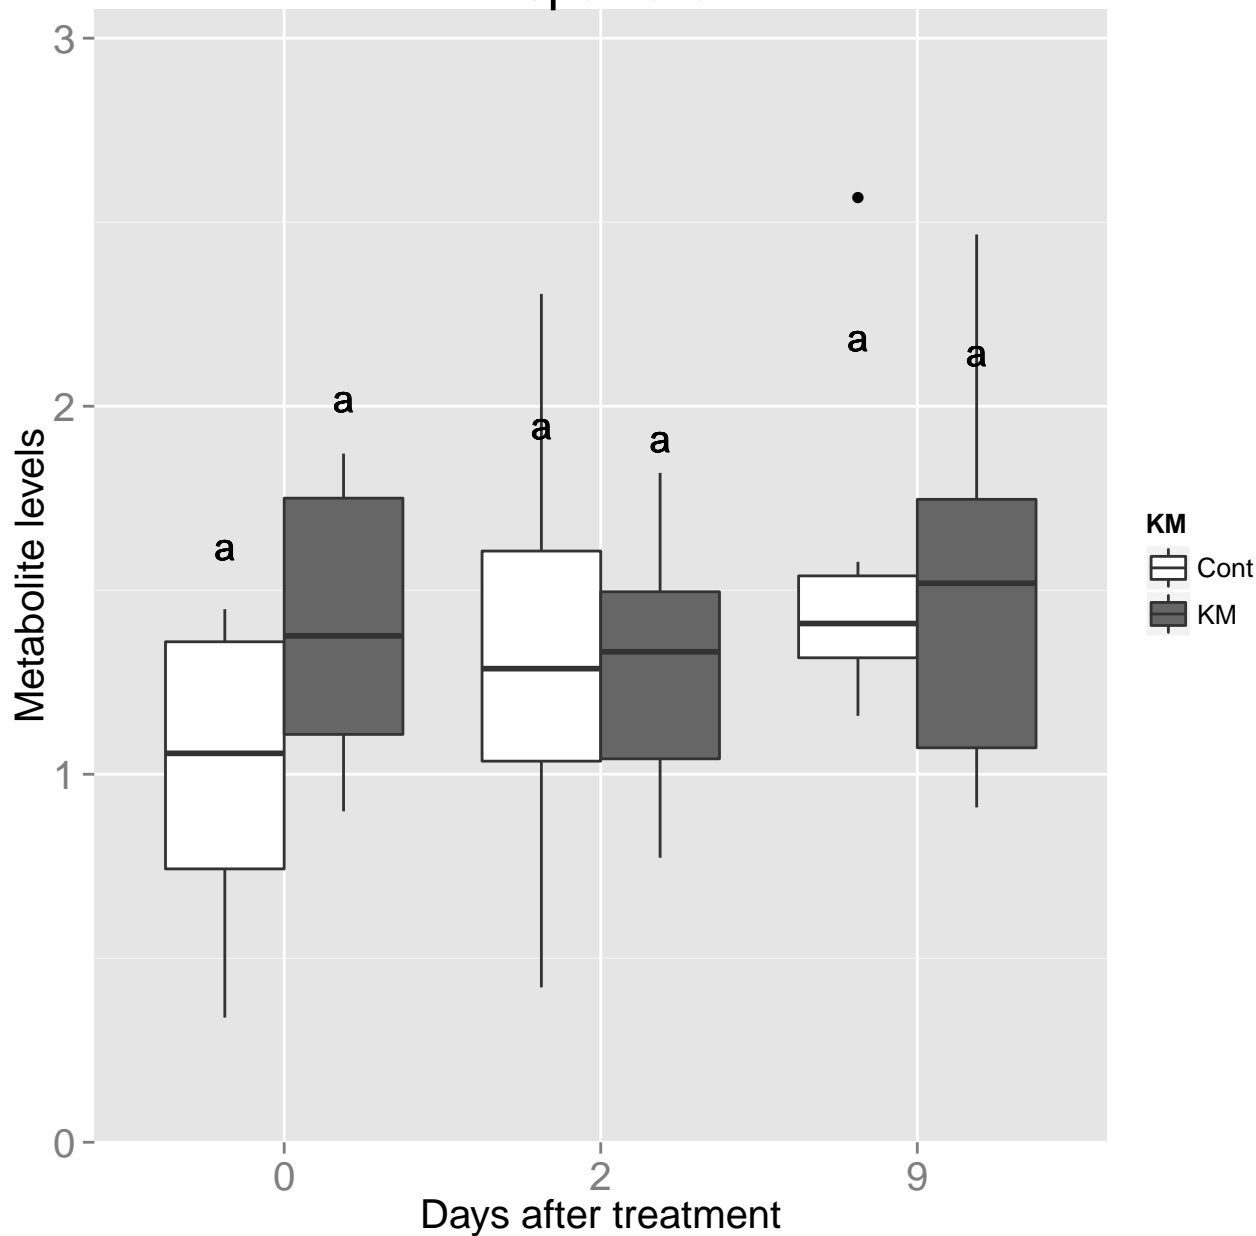

# Methionine

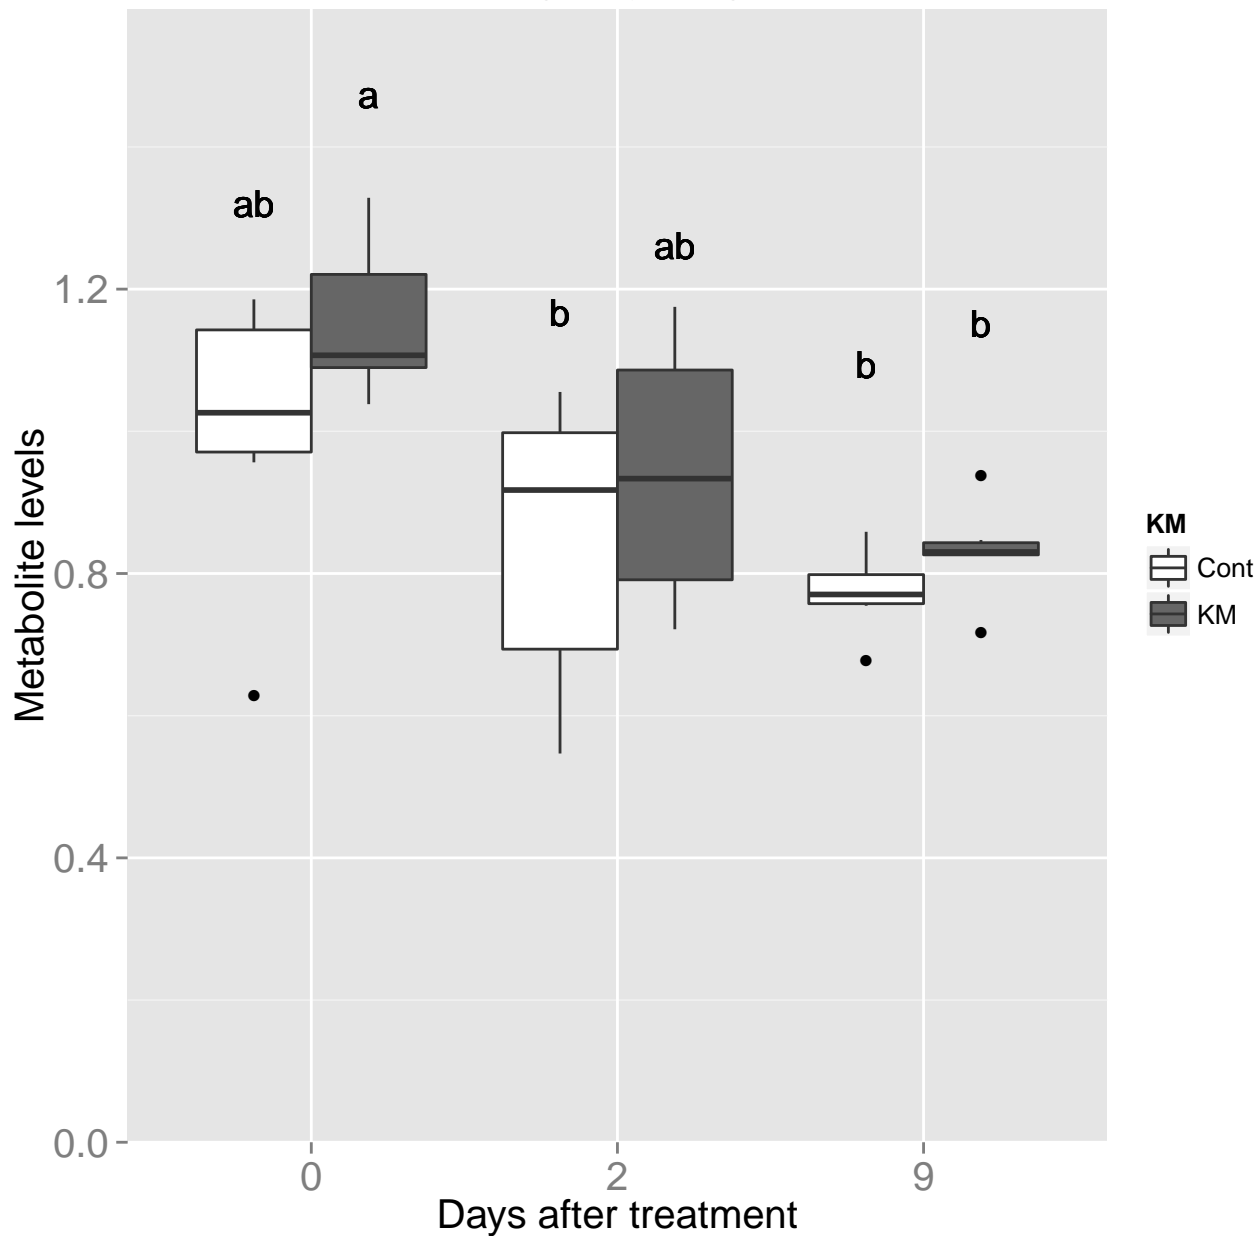

# Xylose

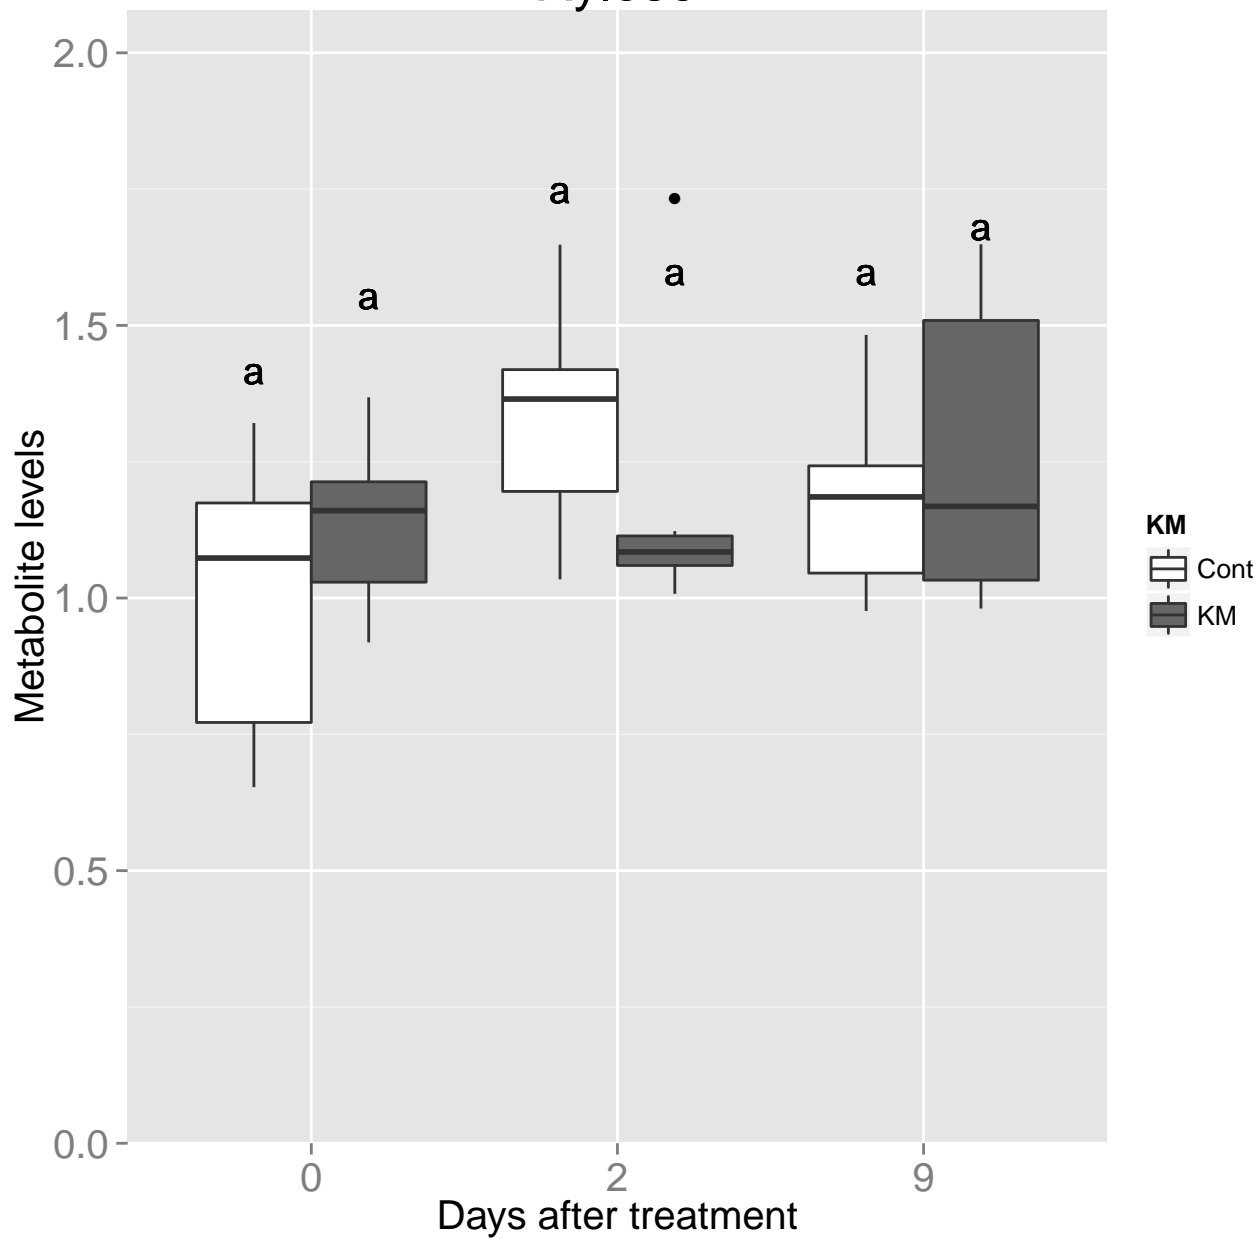



# Pyroglutamate

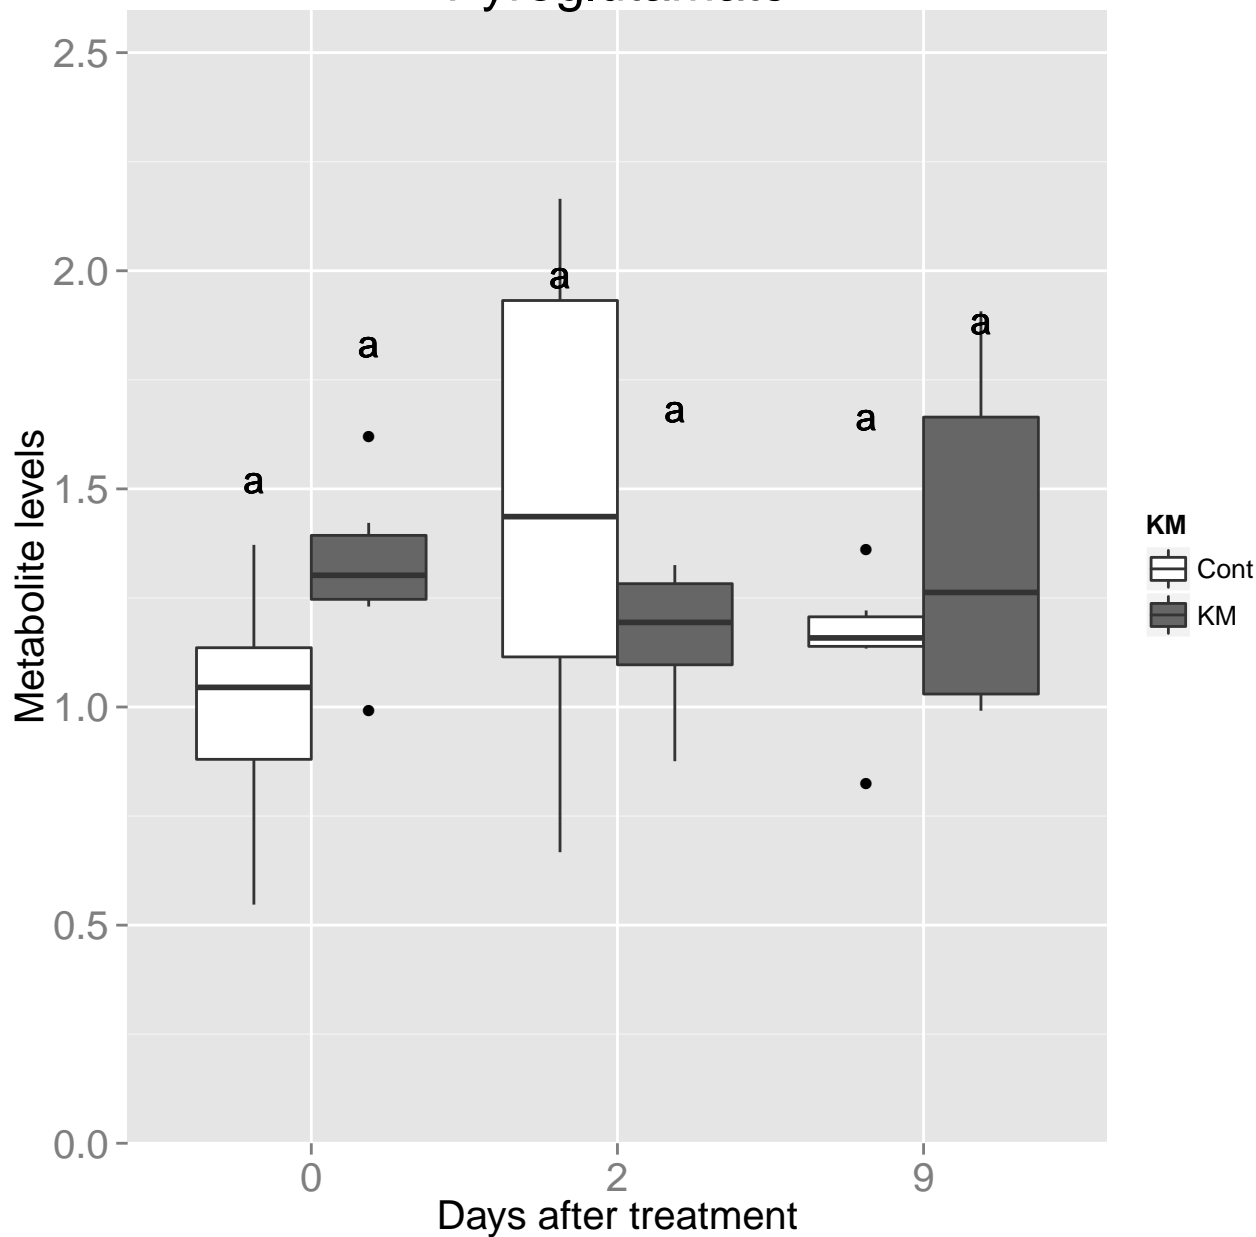

# Glutamate

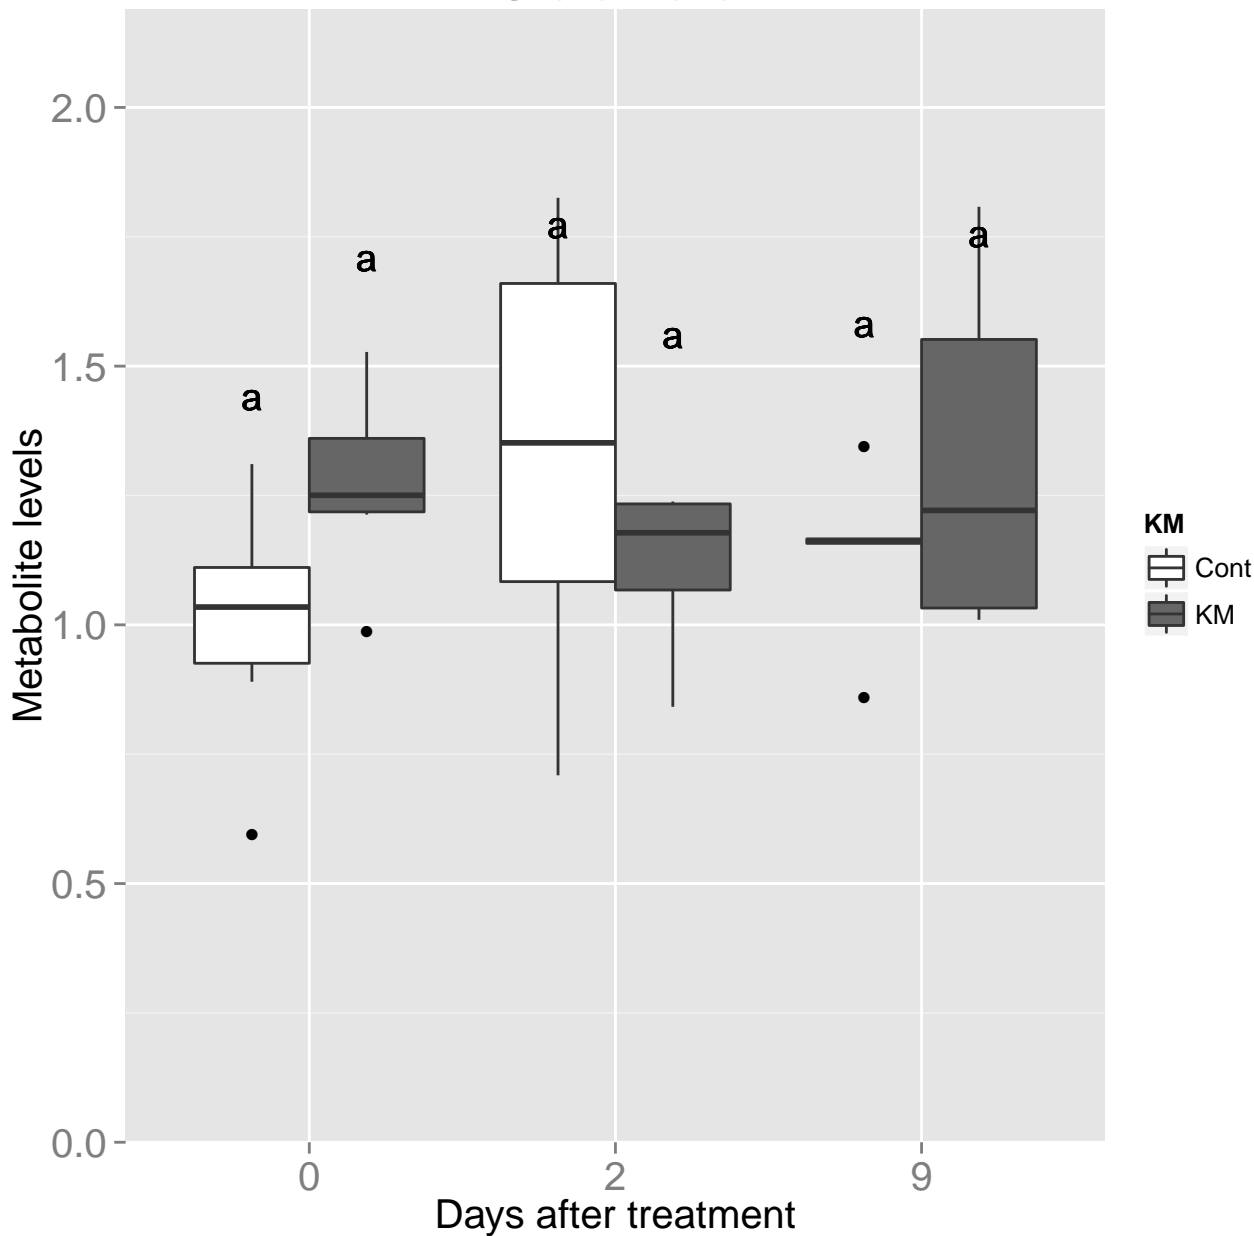

# Rhamnose

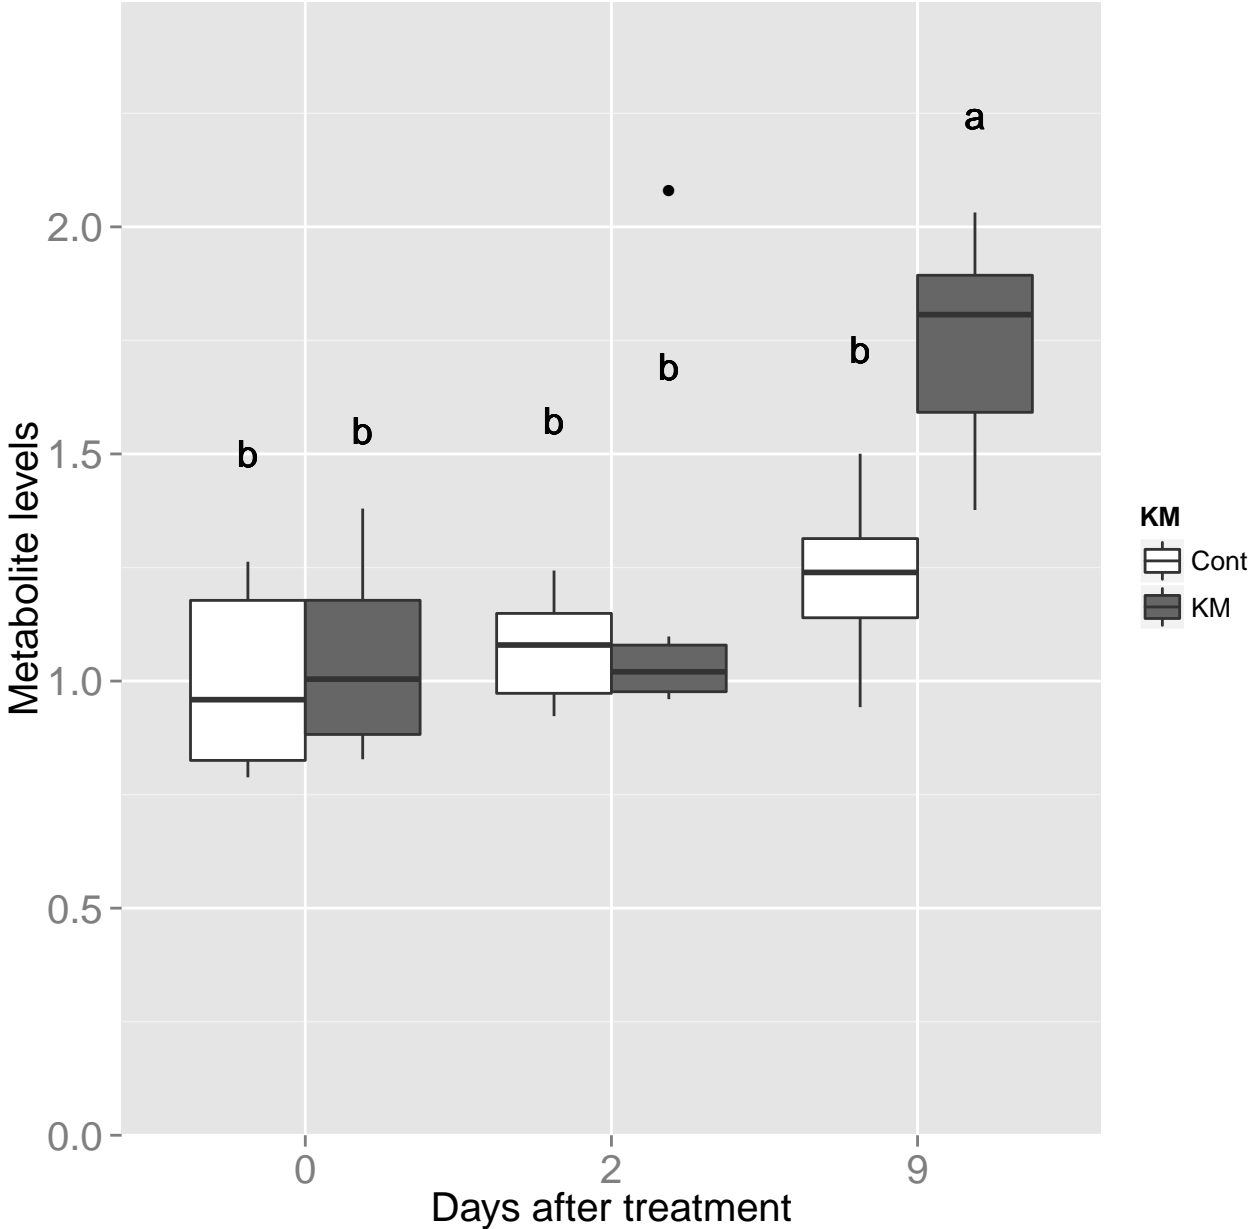

# Putrescine

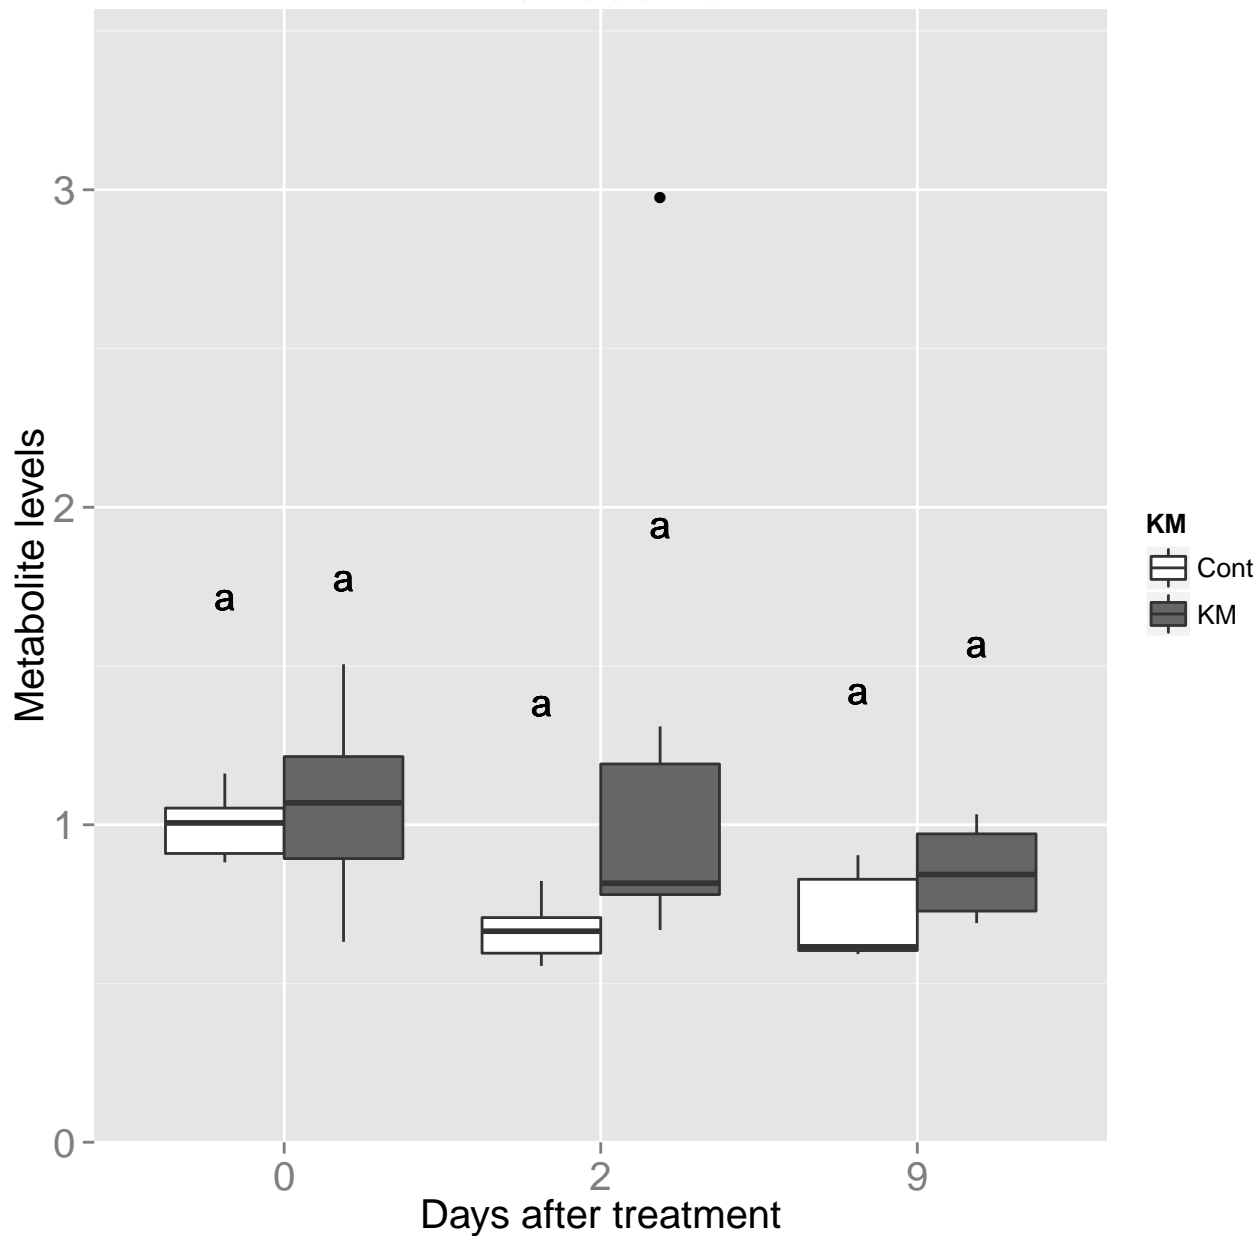

# Fucose

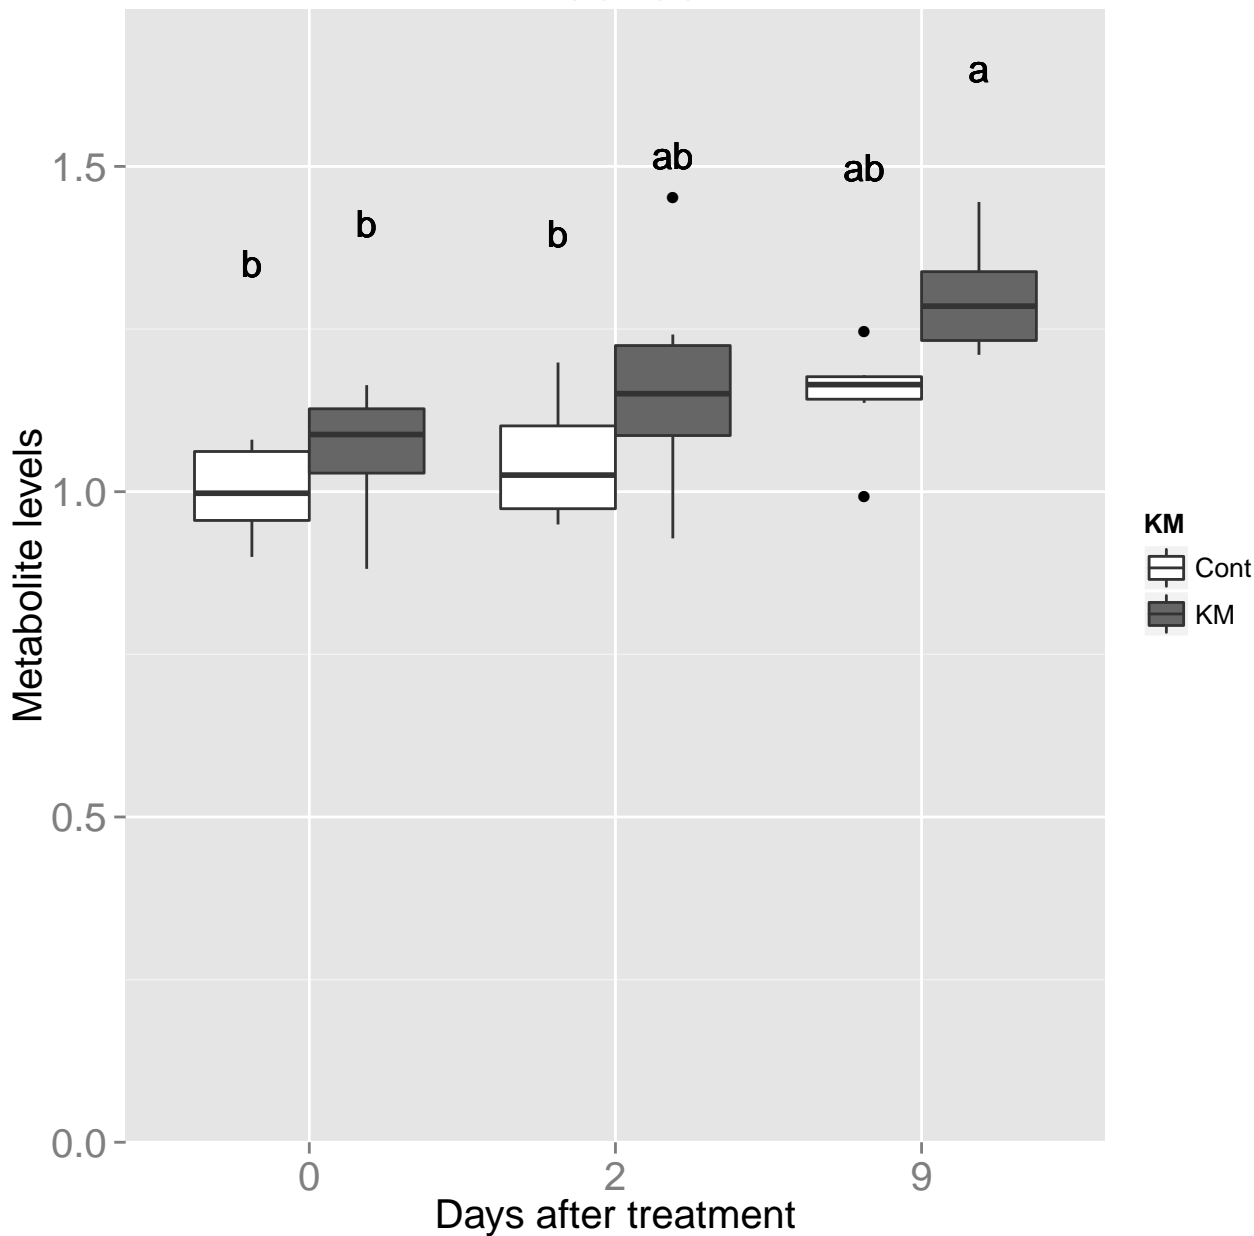

# X2OG

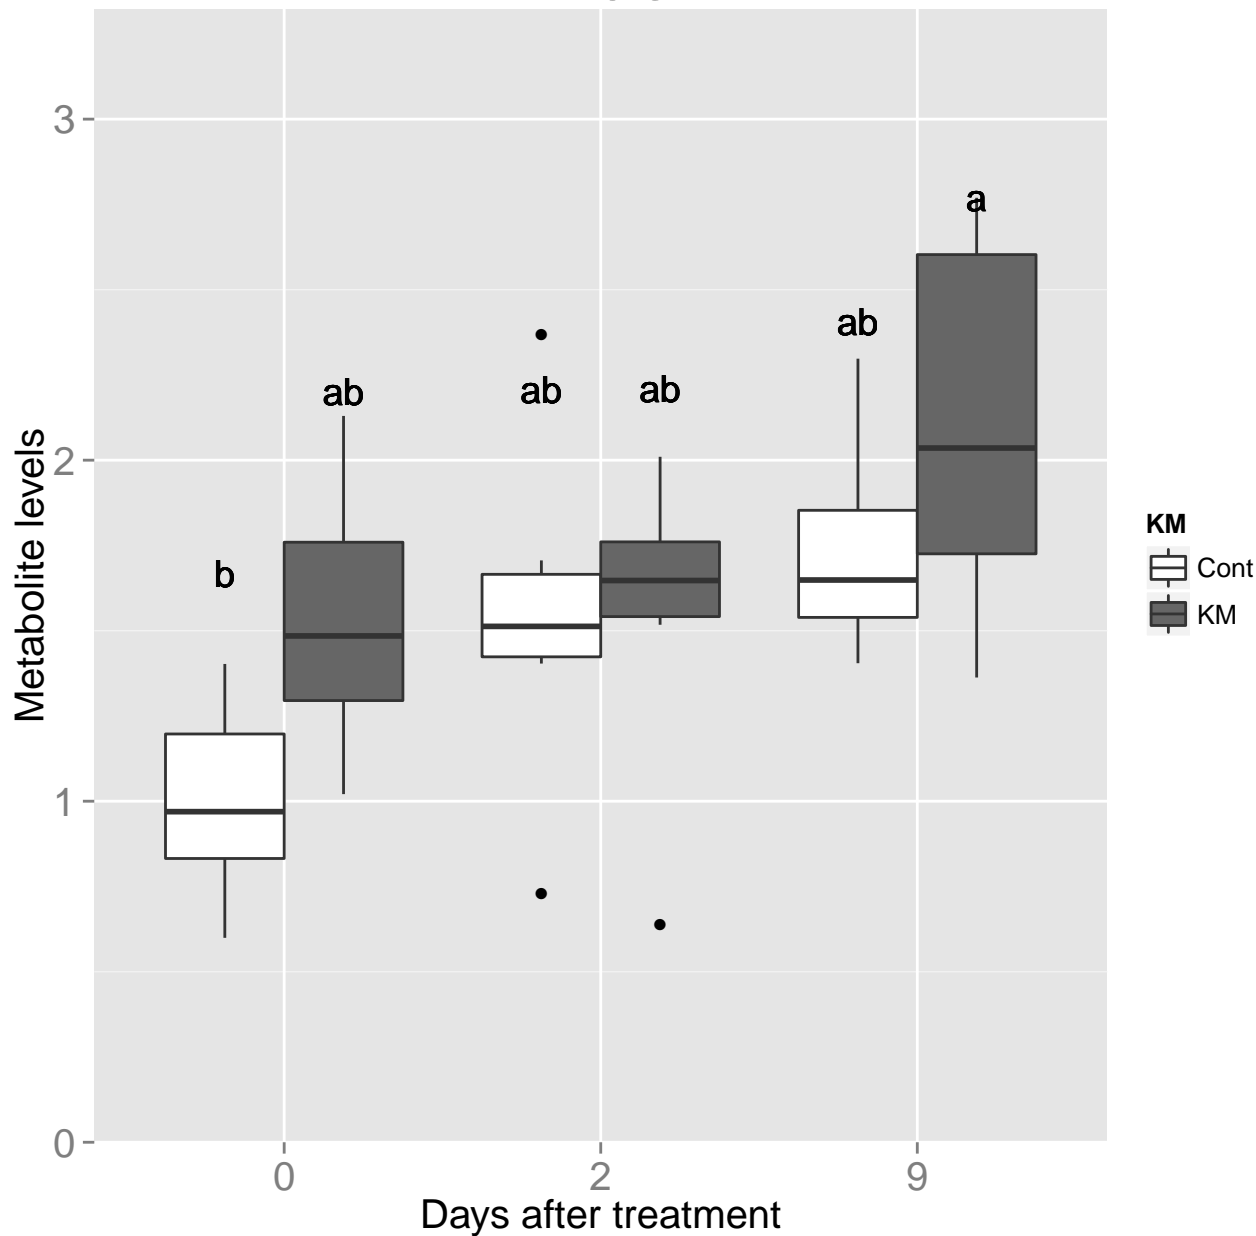

# Phenylalanine

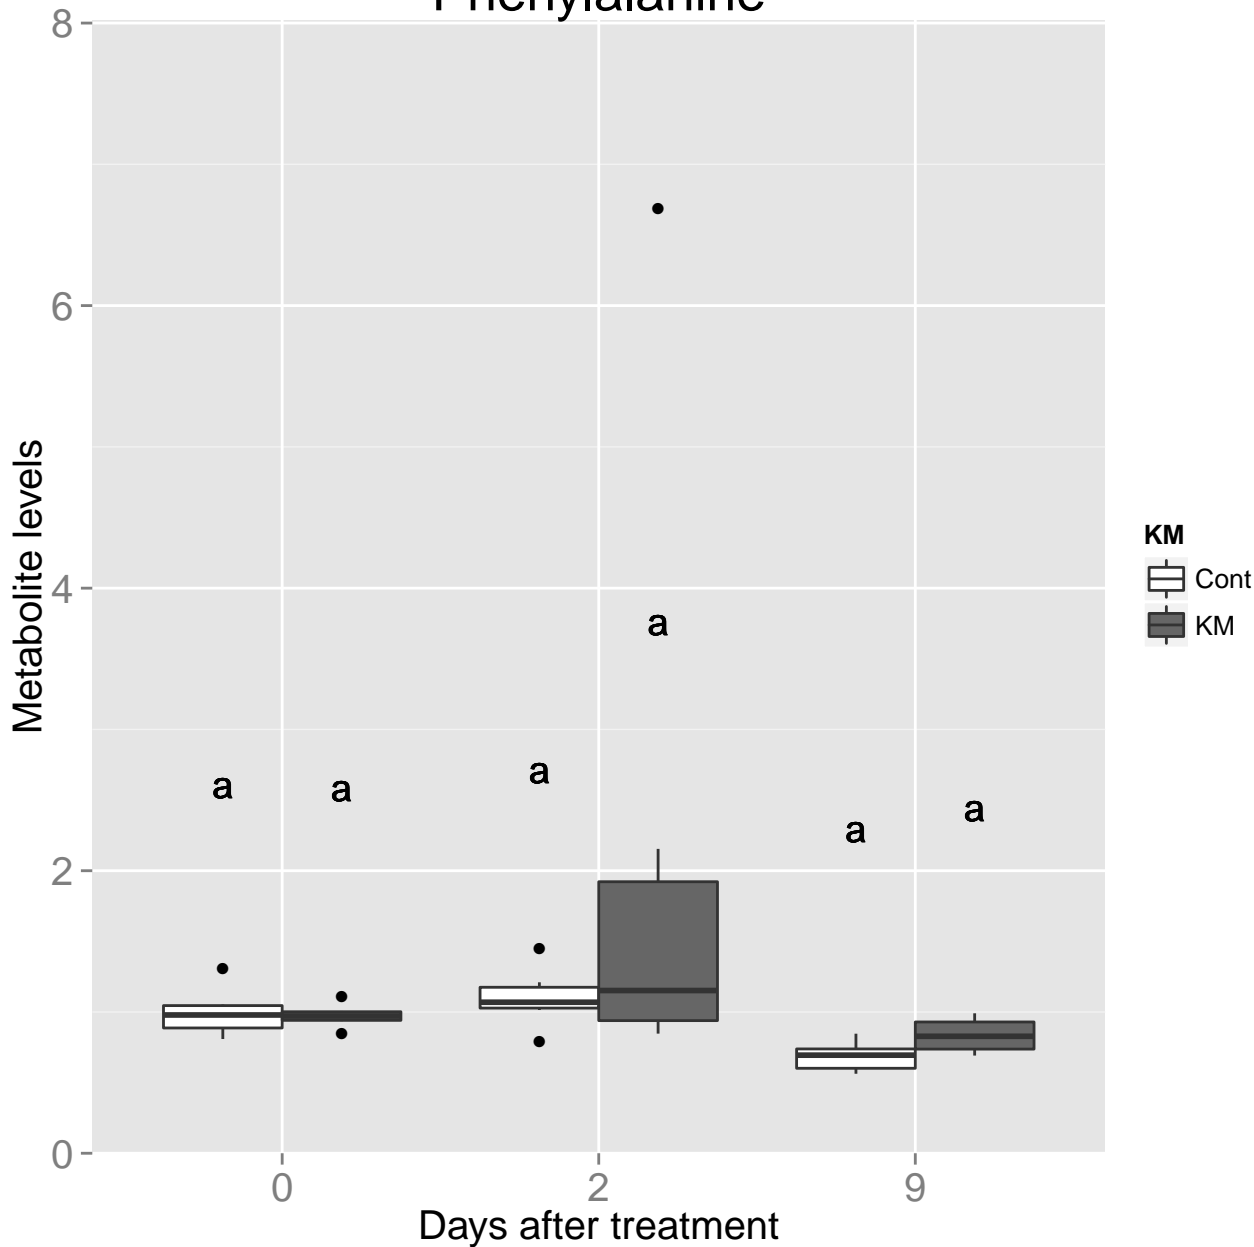

# Asparagine

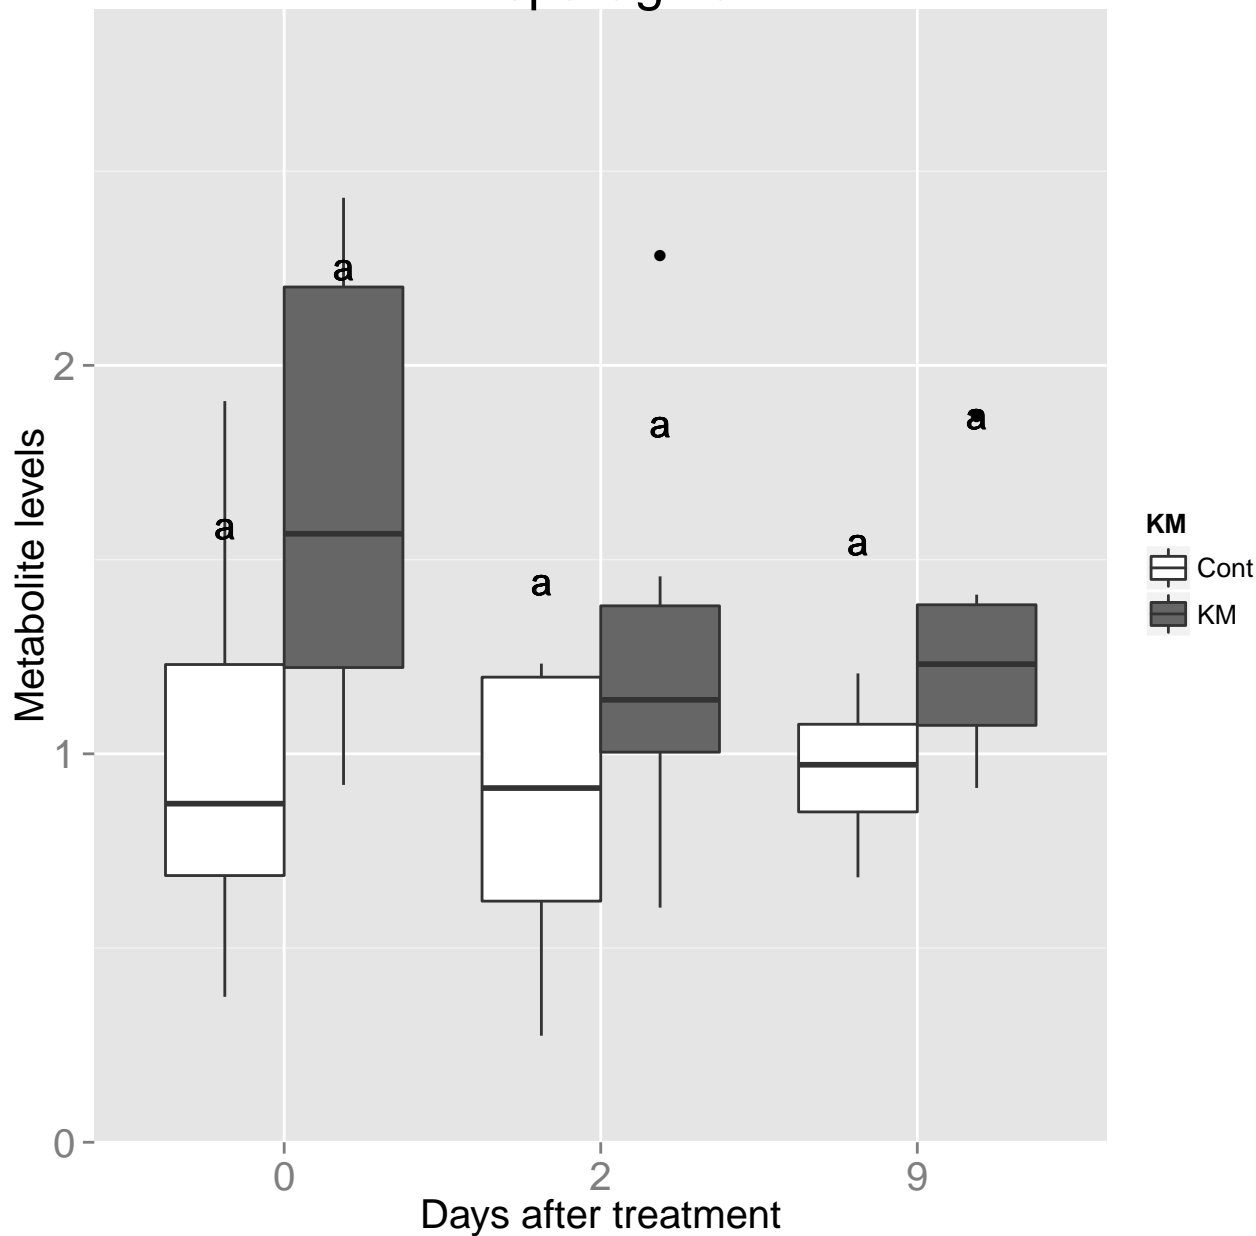



# Glyceraldehyde.3.phosphate

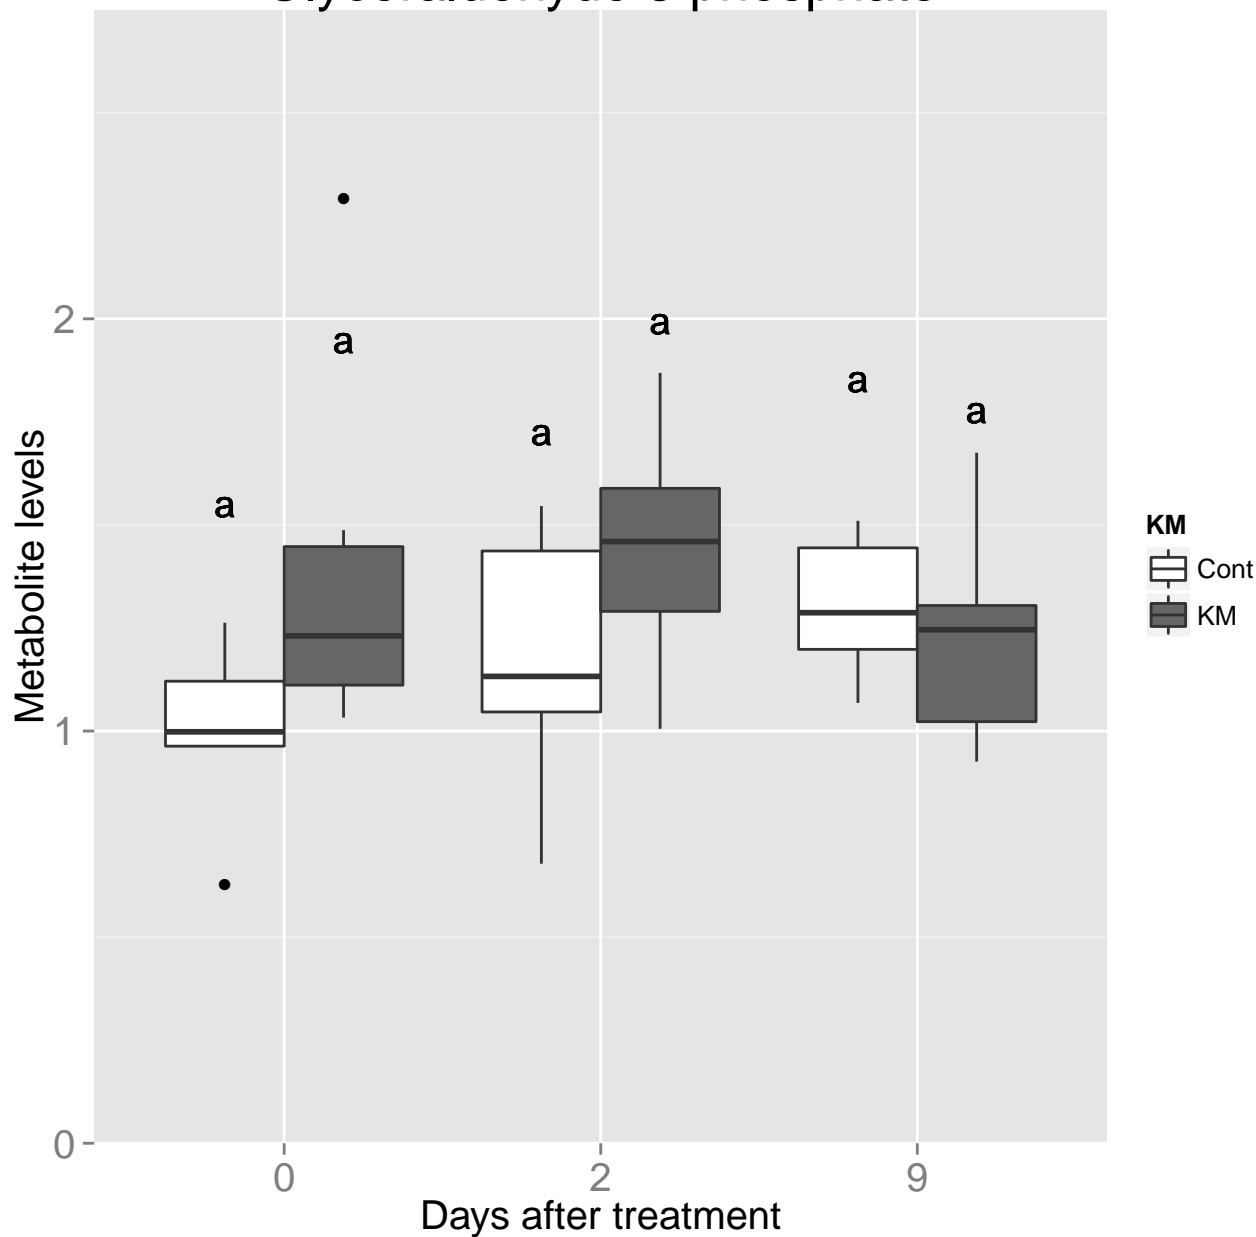

# Fructose

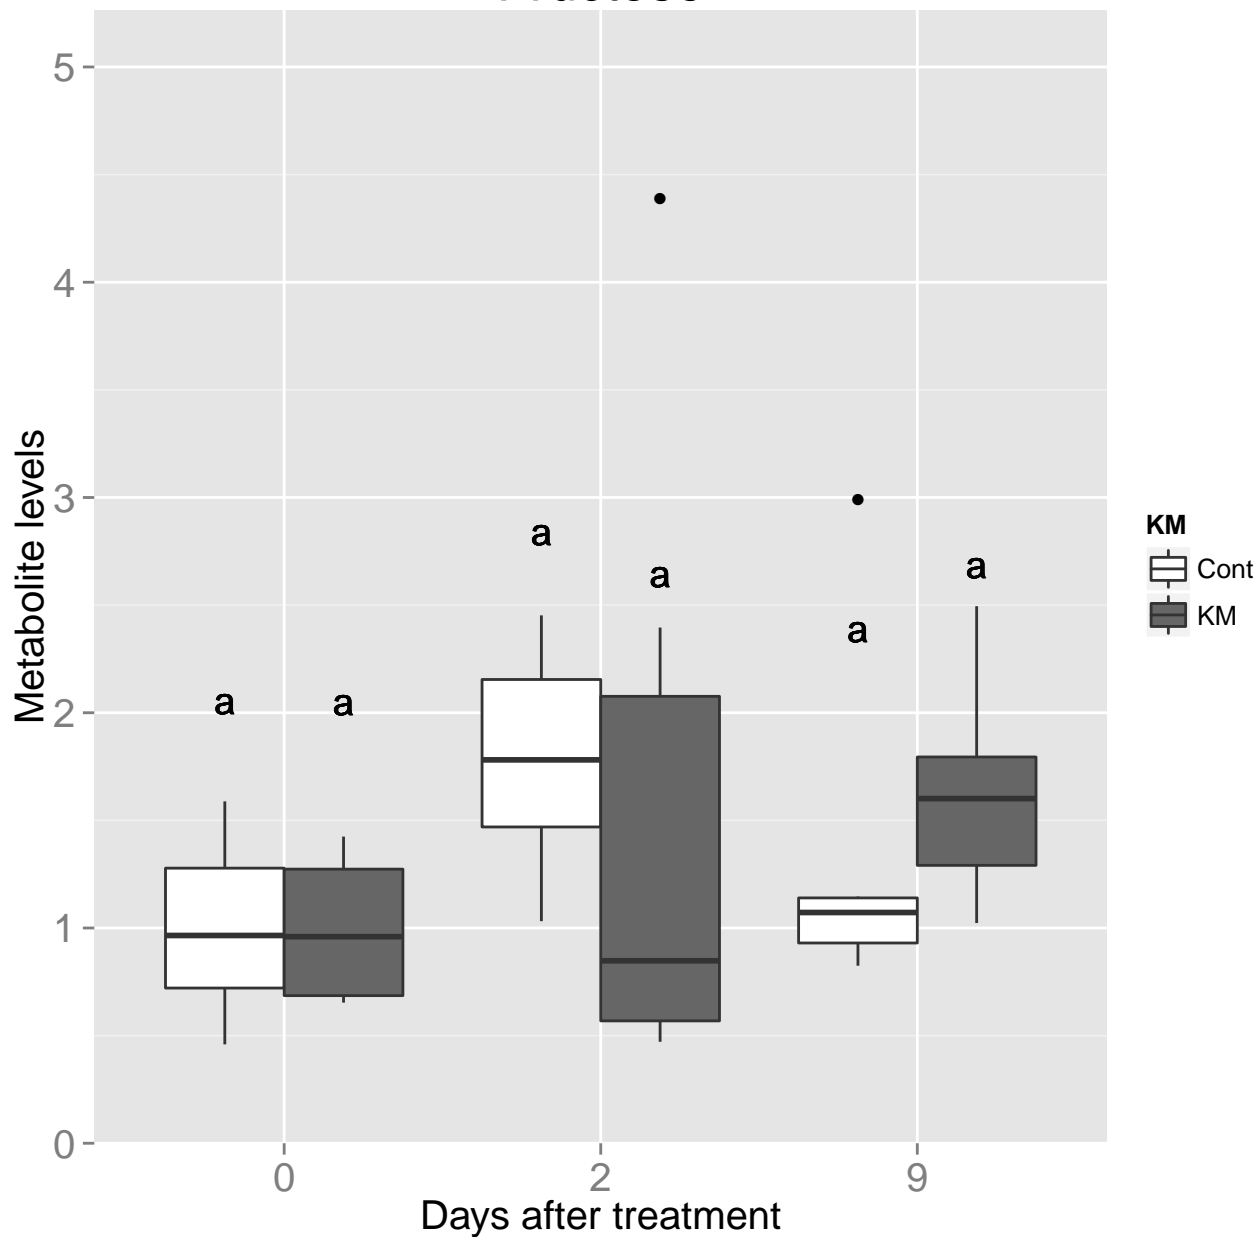

# Sorbitol

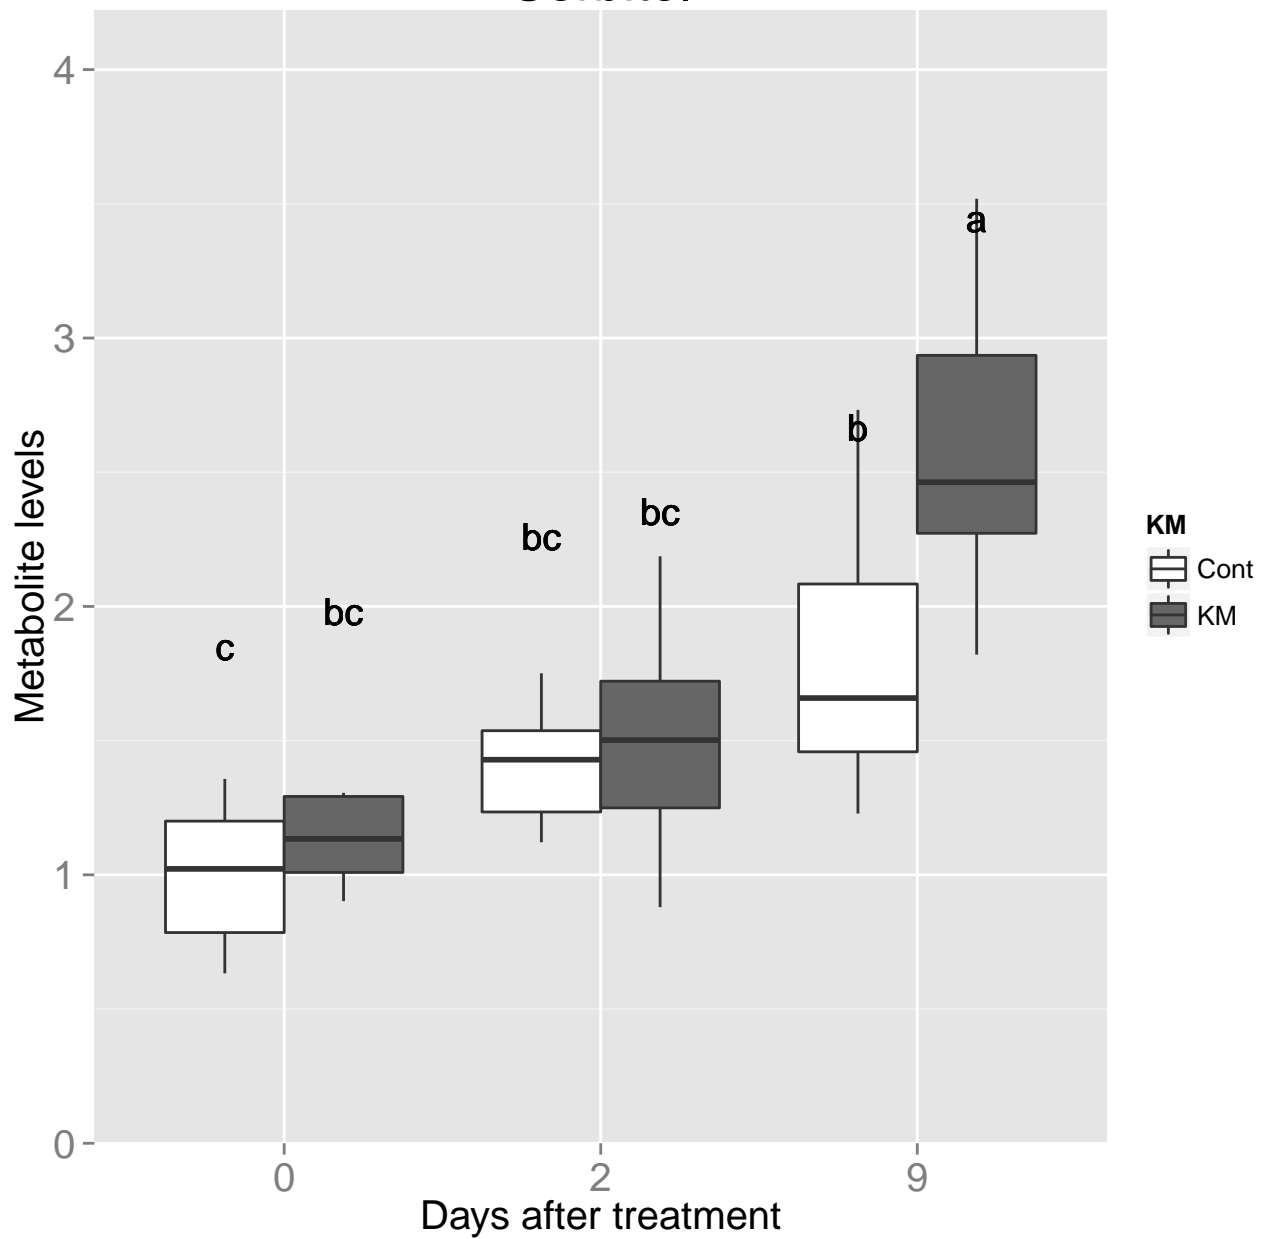

# Glucose

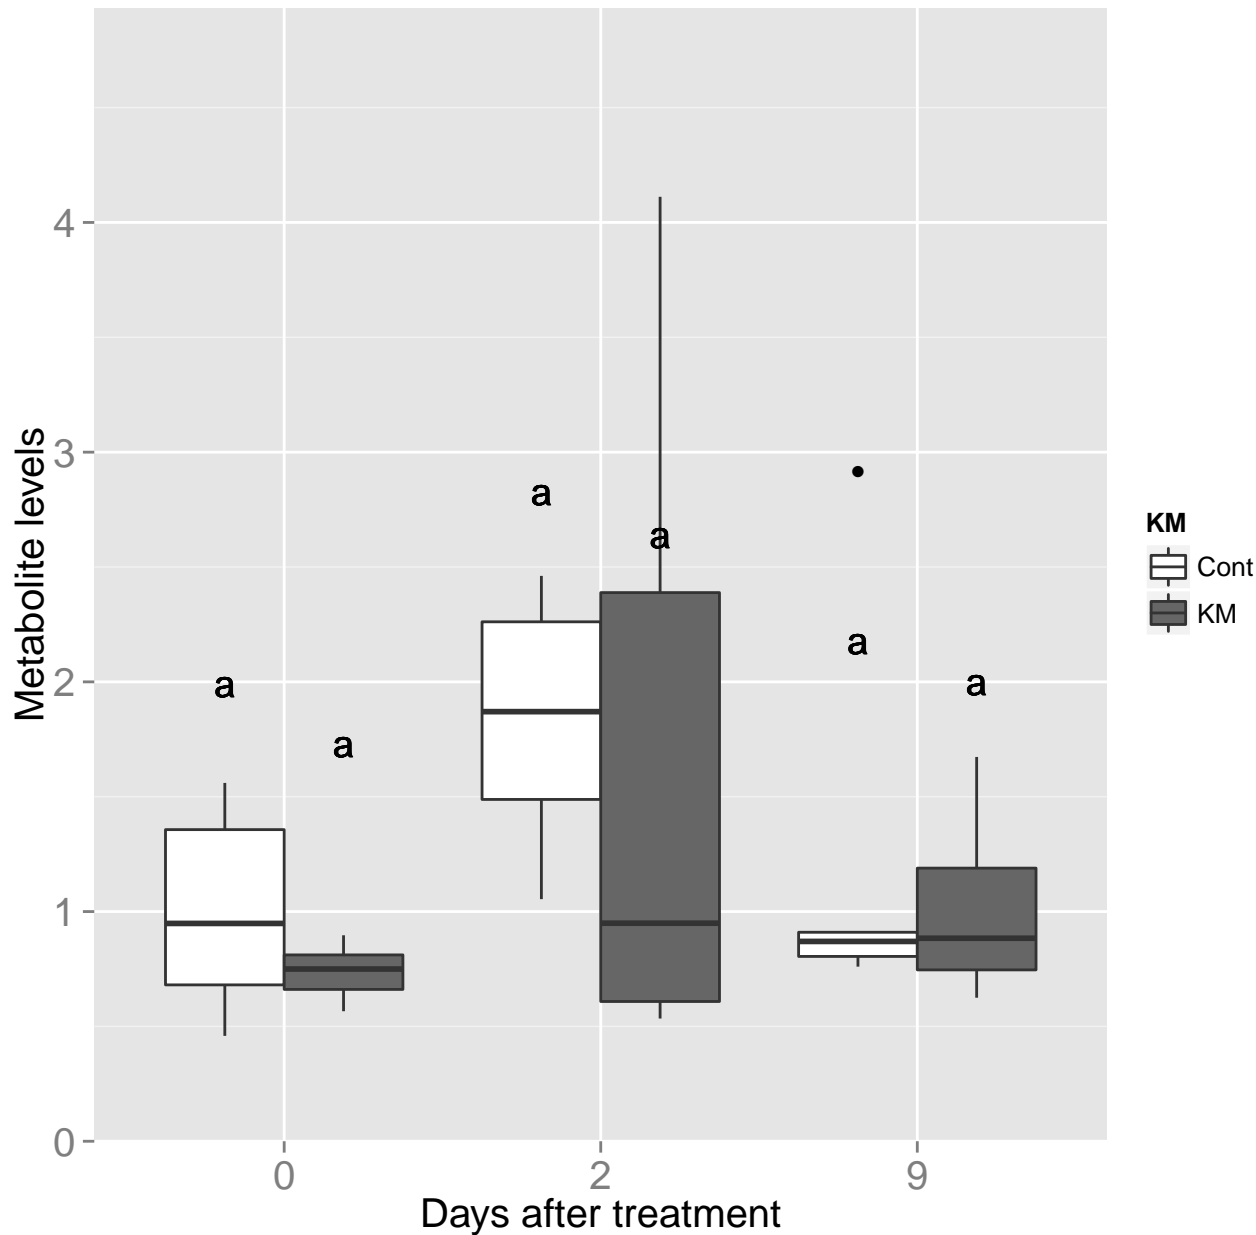

# Citrate

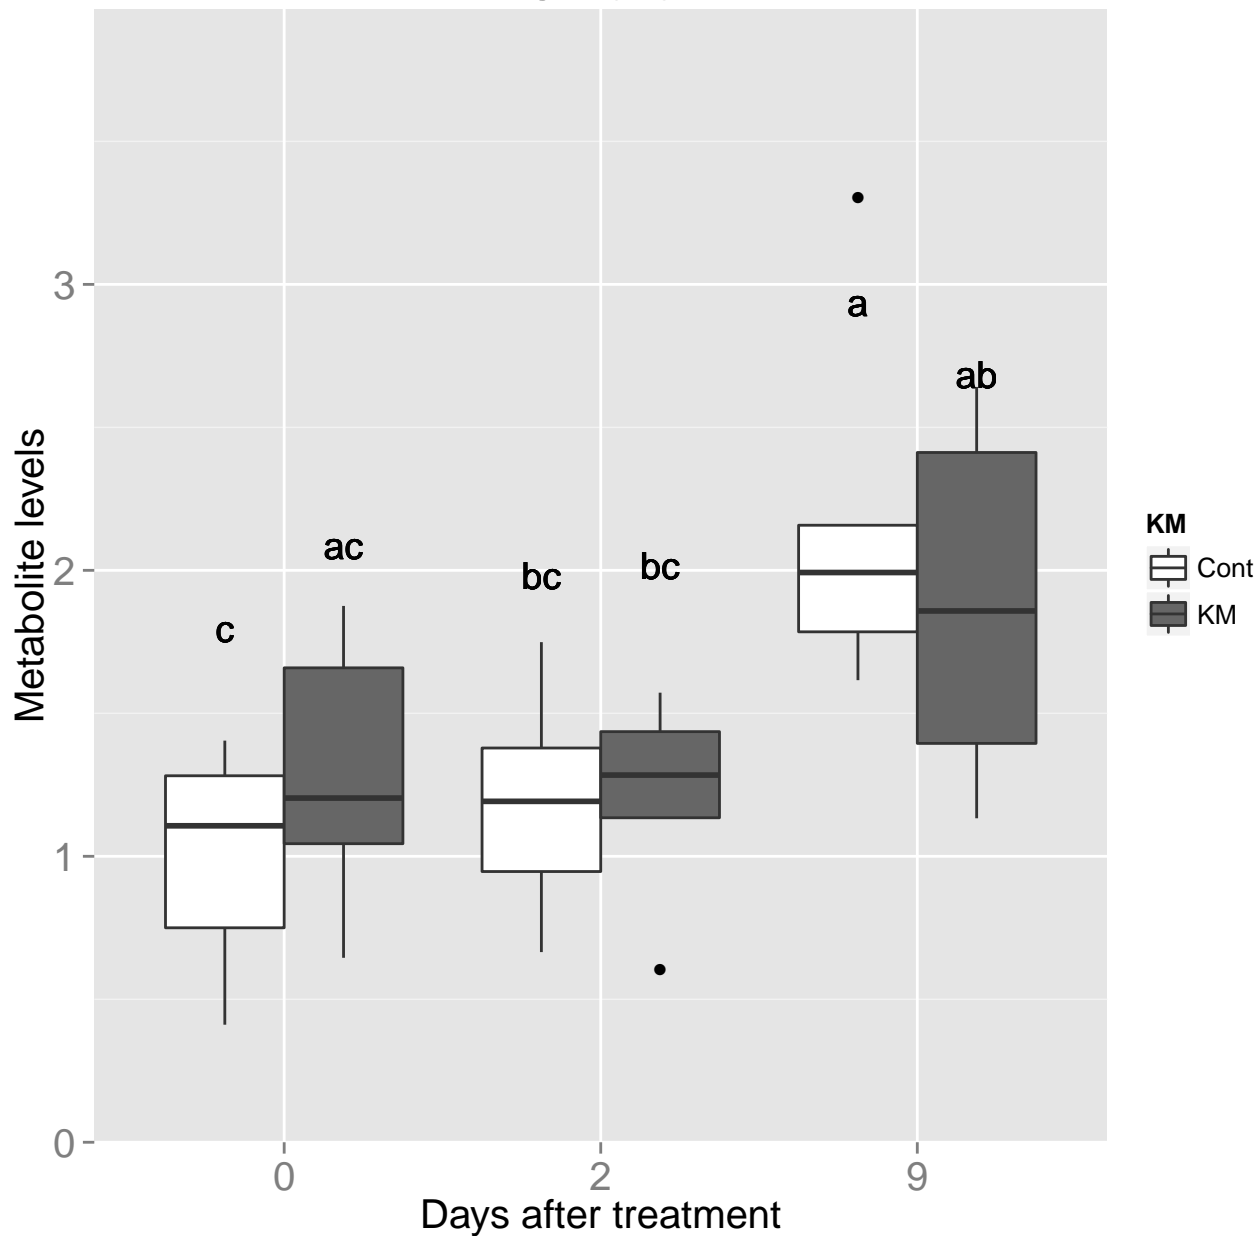

# Glutamine

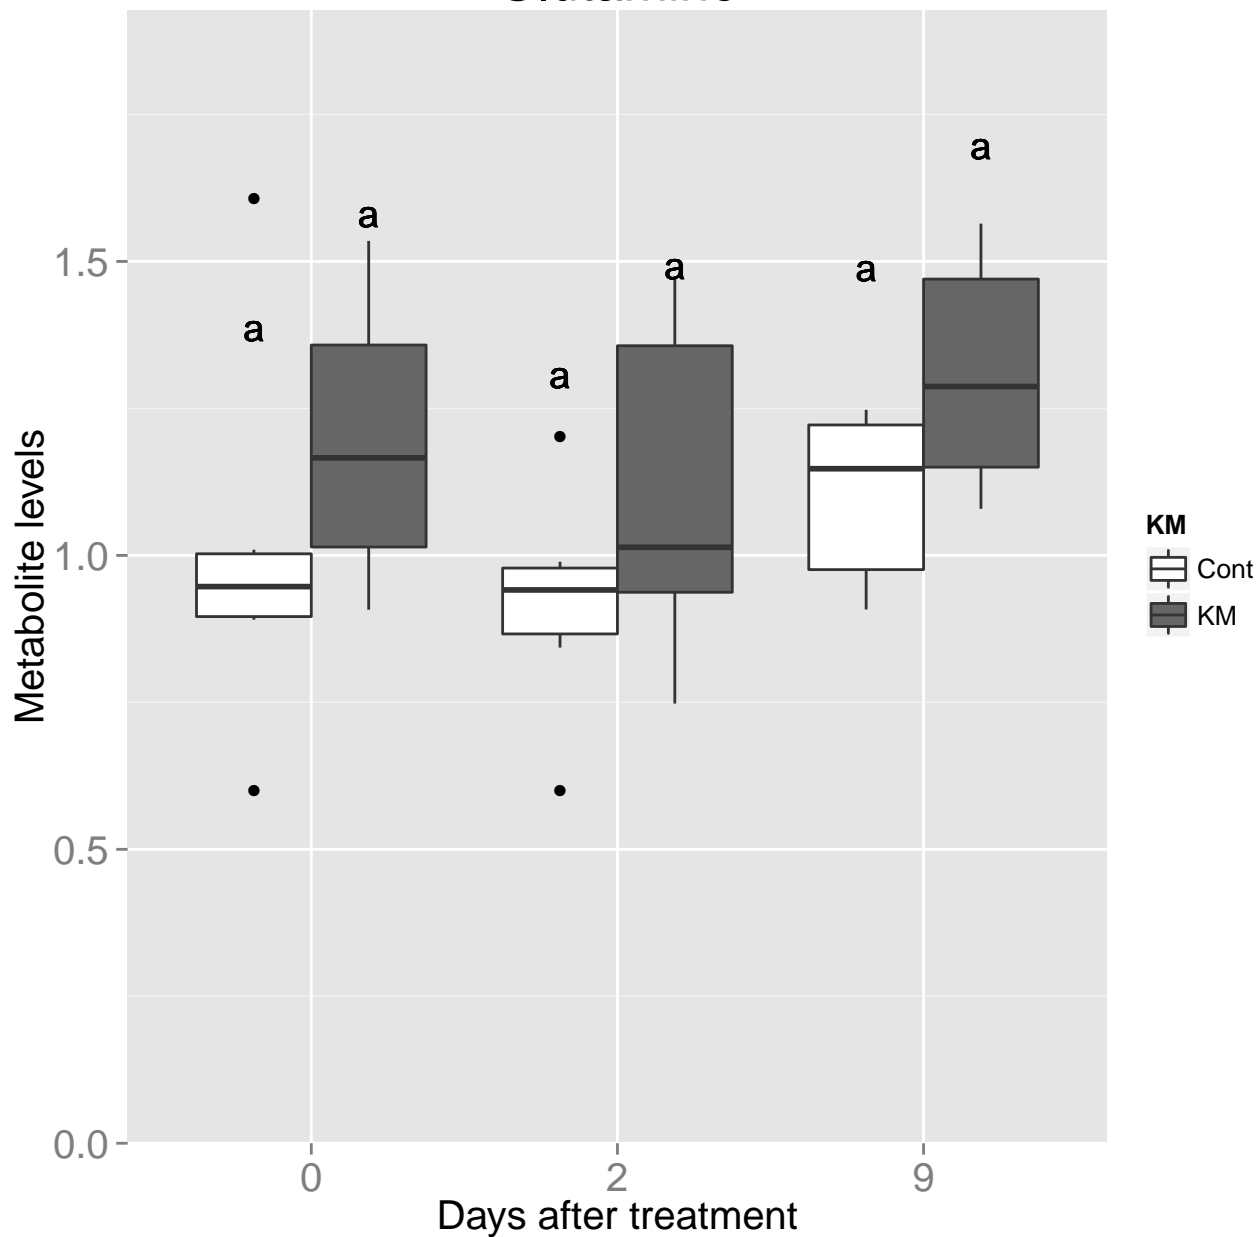

# X2.oxogulonate

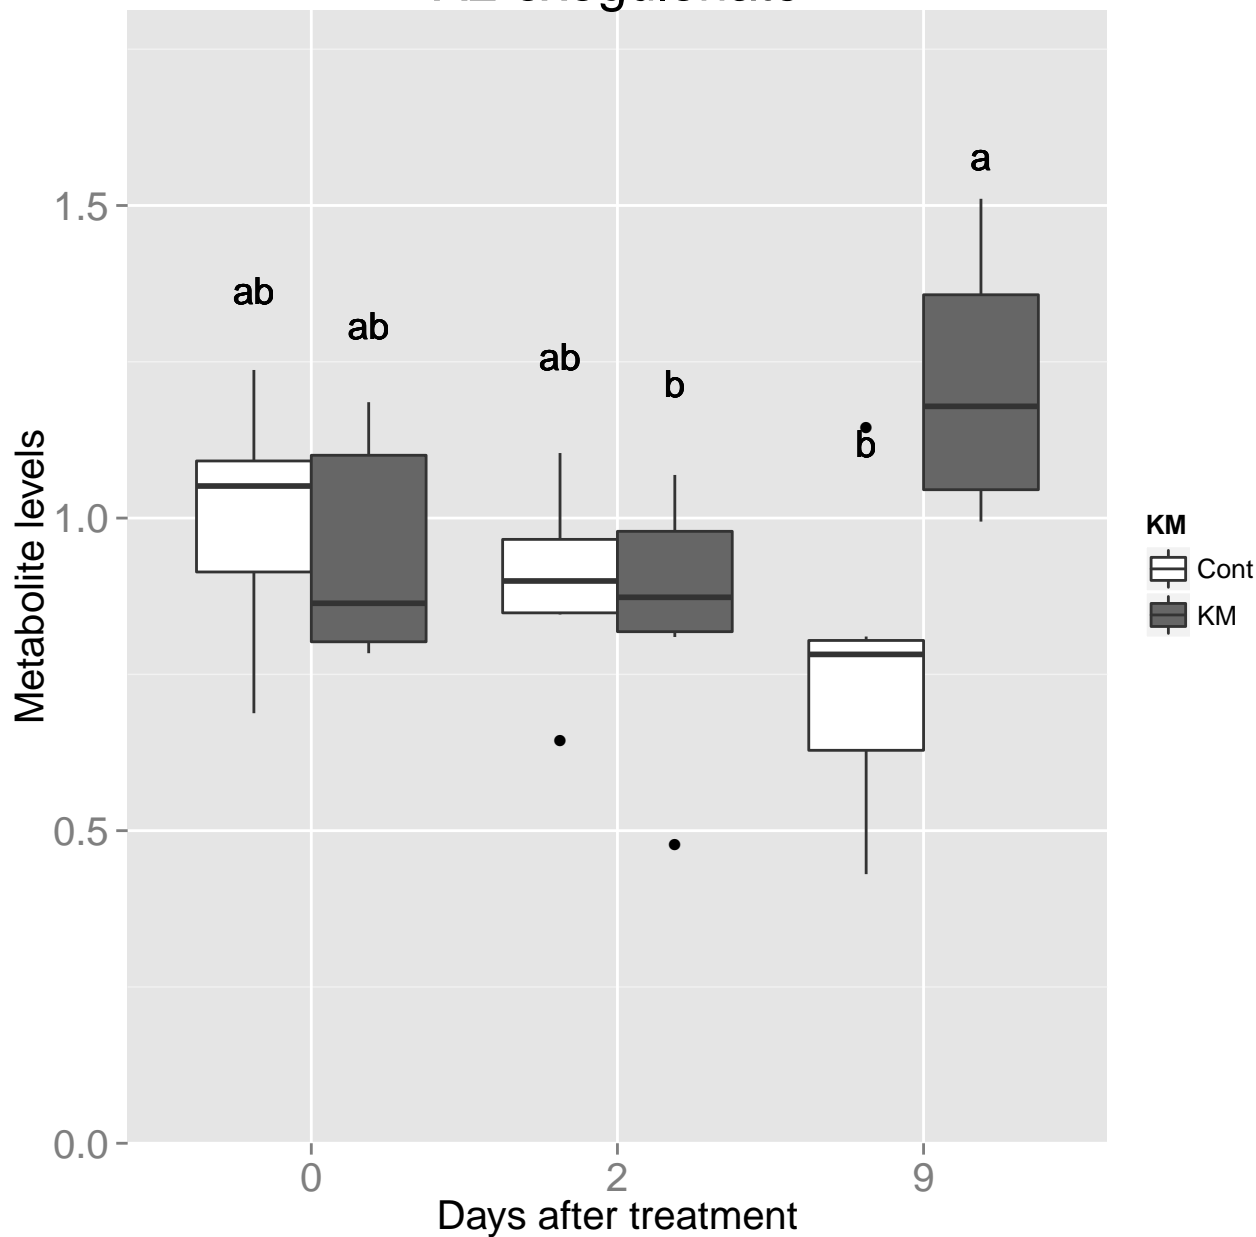

# Glucopyranoside

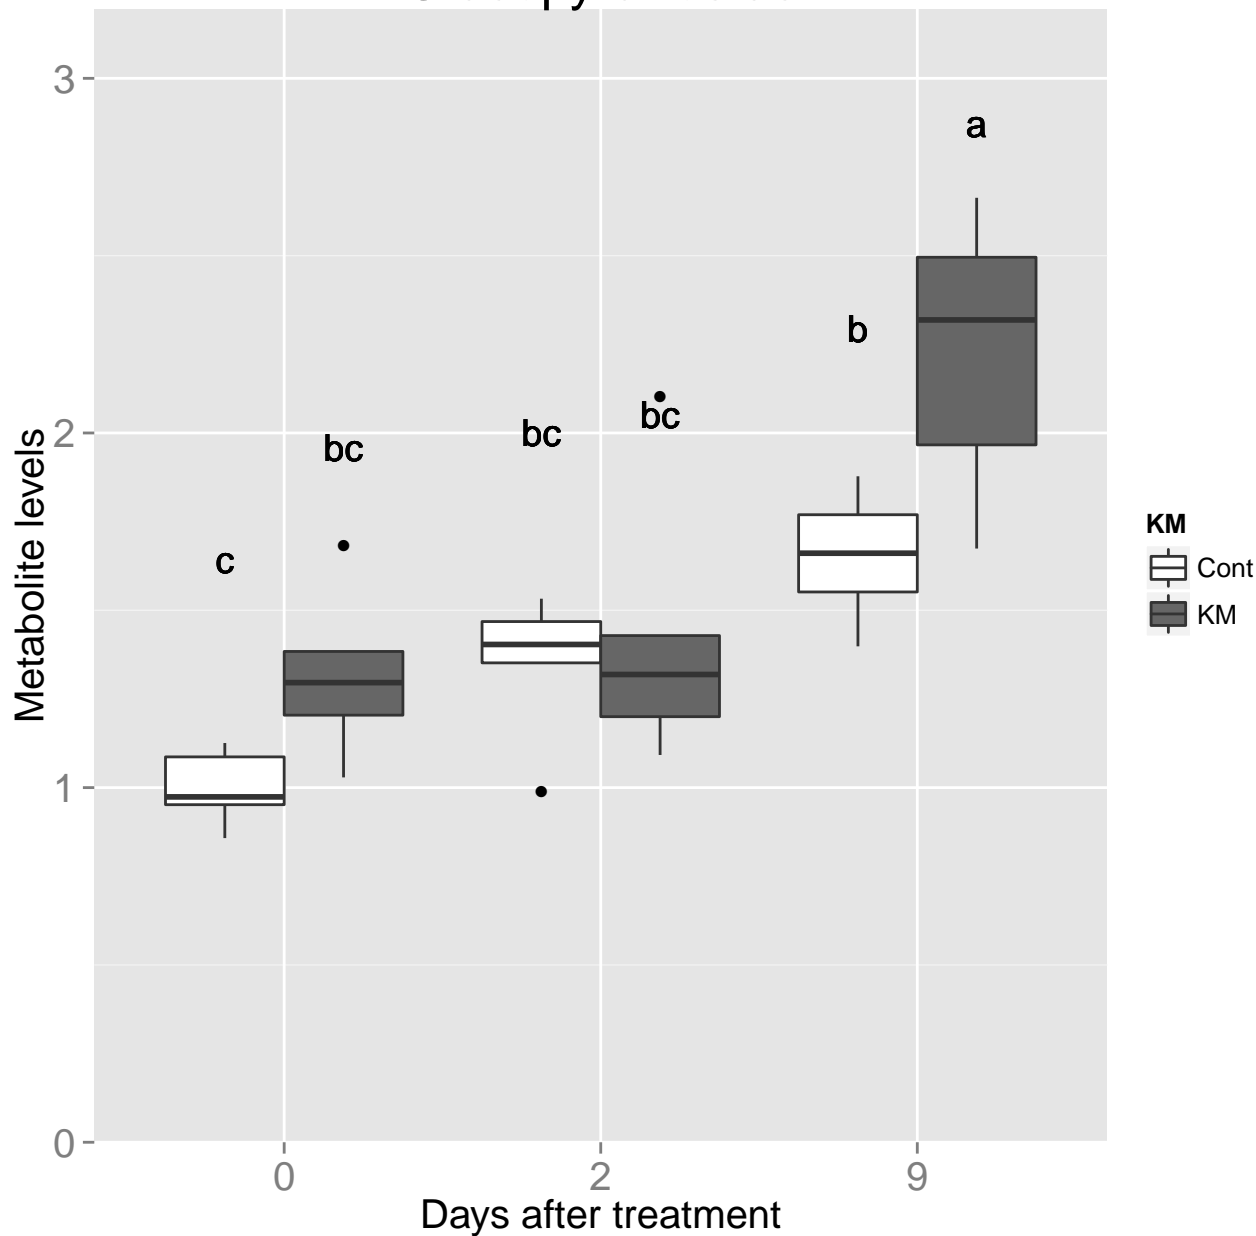



# Galactonolactone

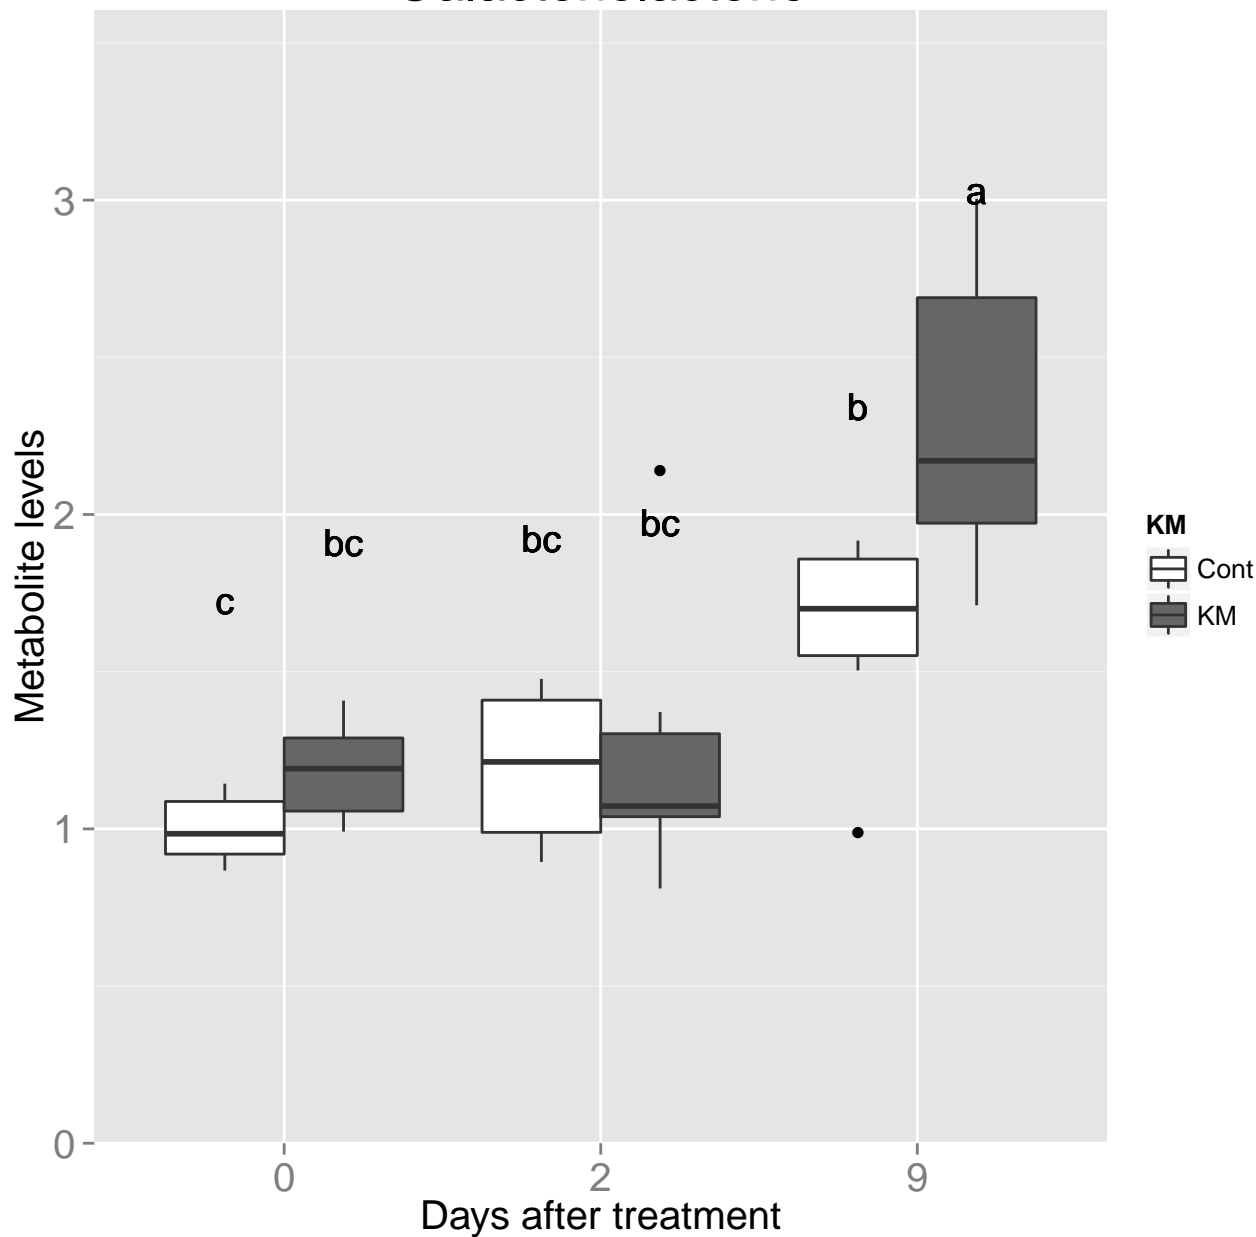

# Dehydroascorbate

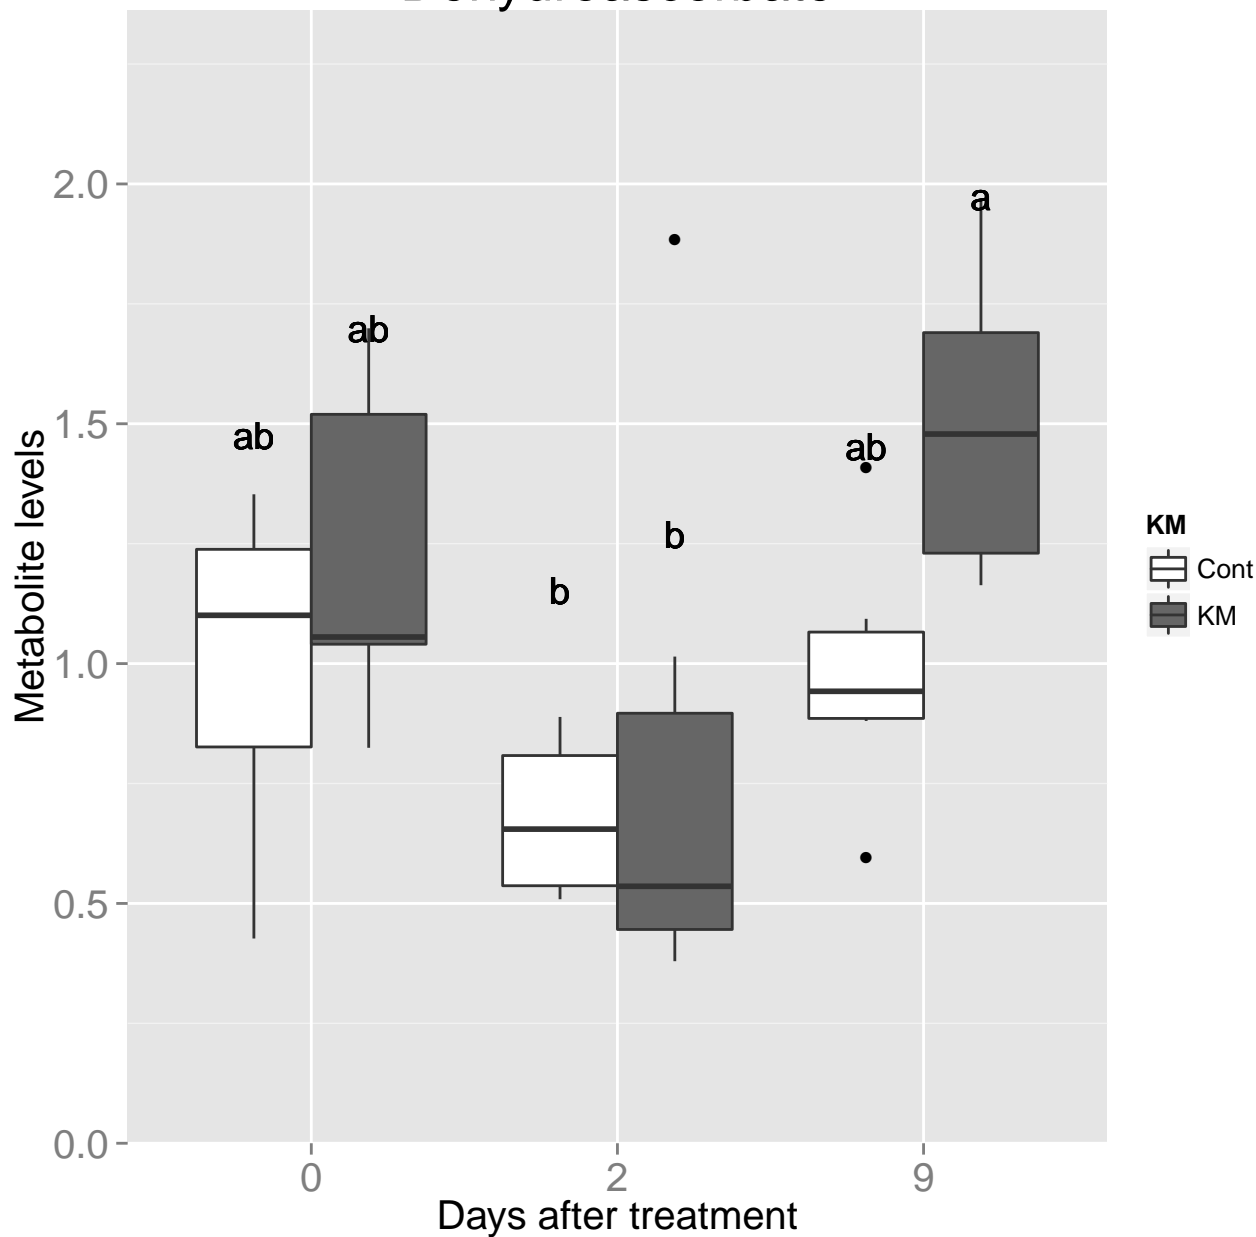

# Galactonate

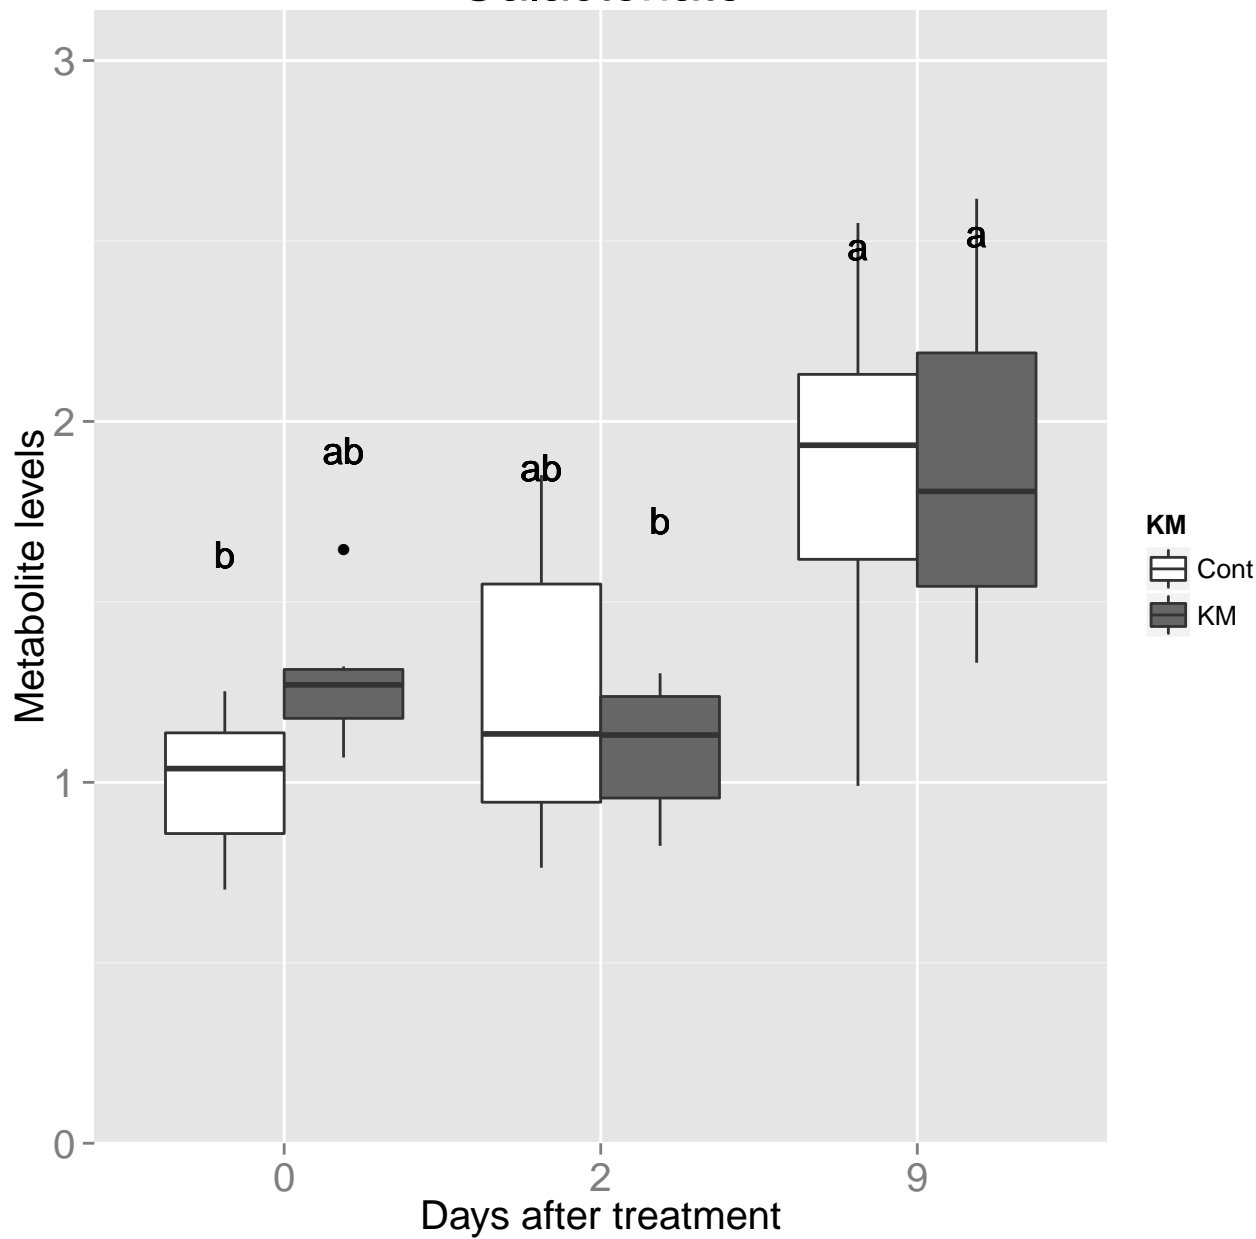

# Tyramine

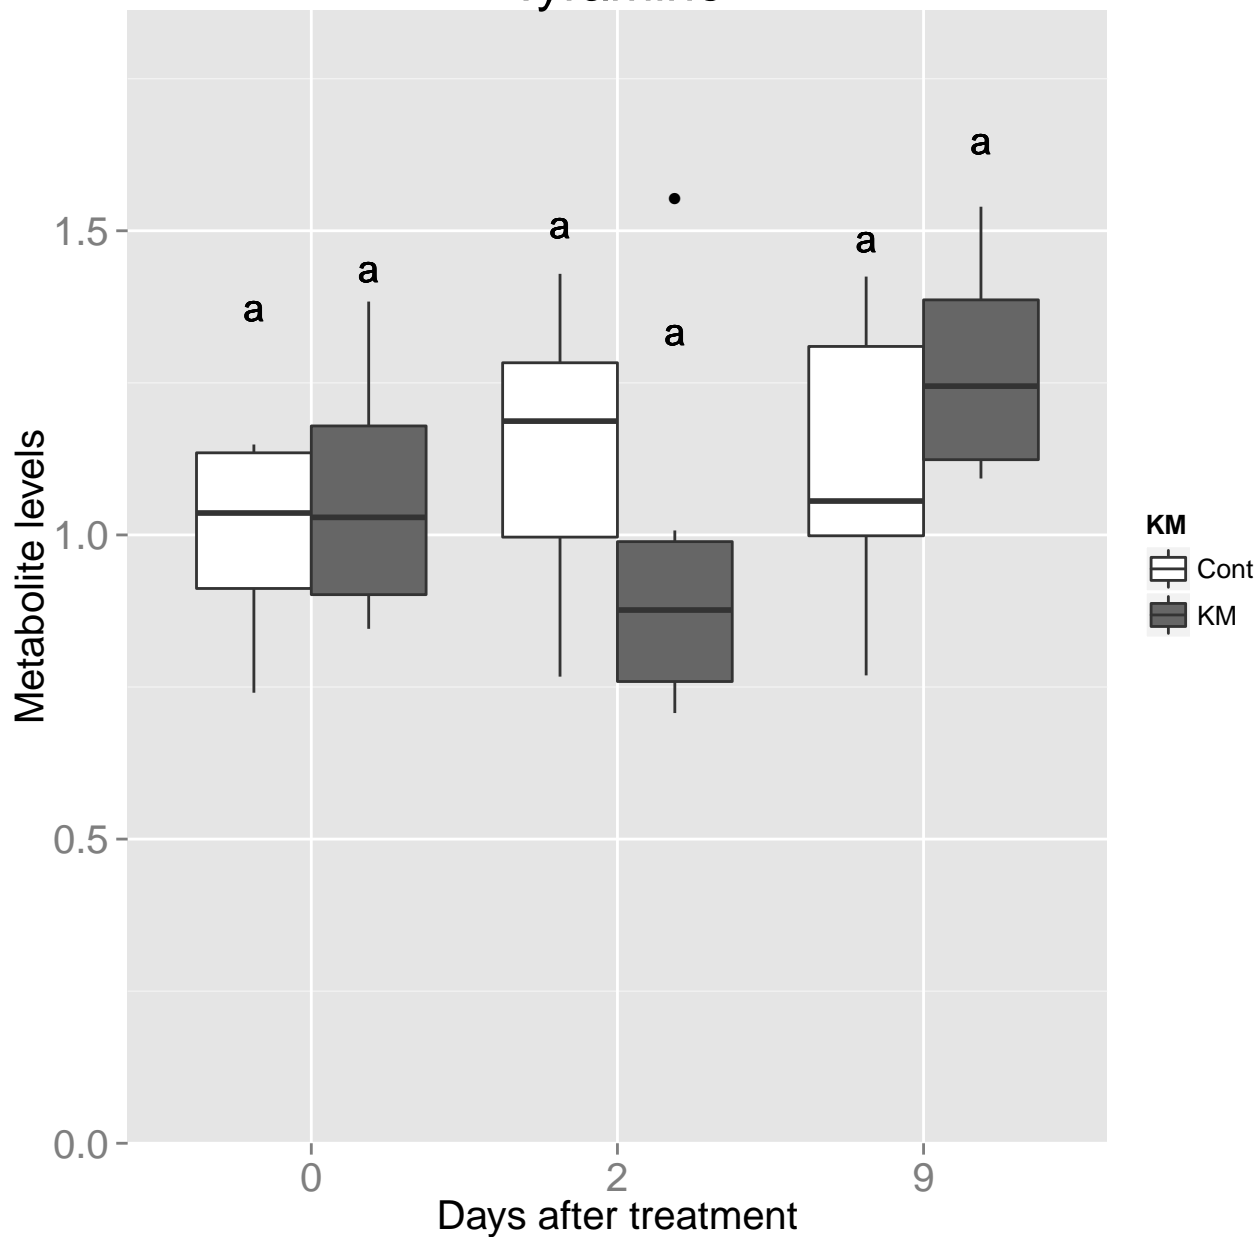

# myo.inositol

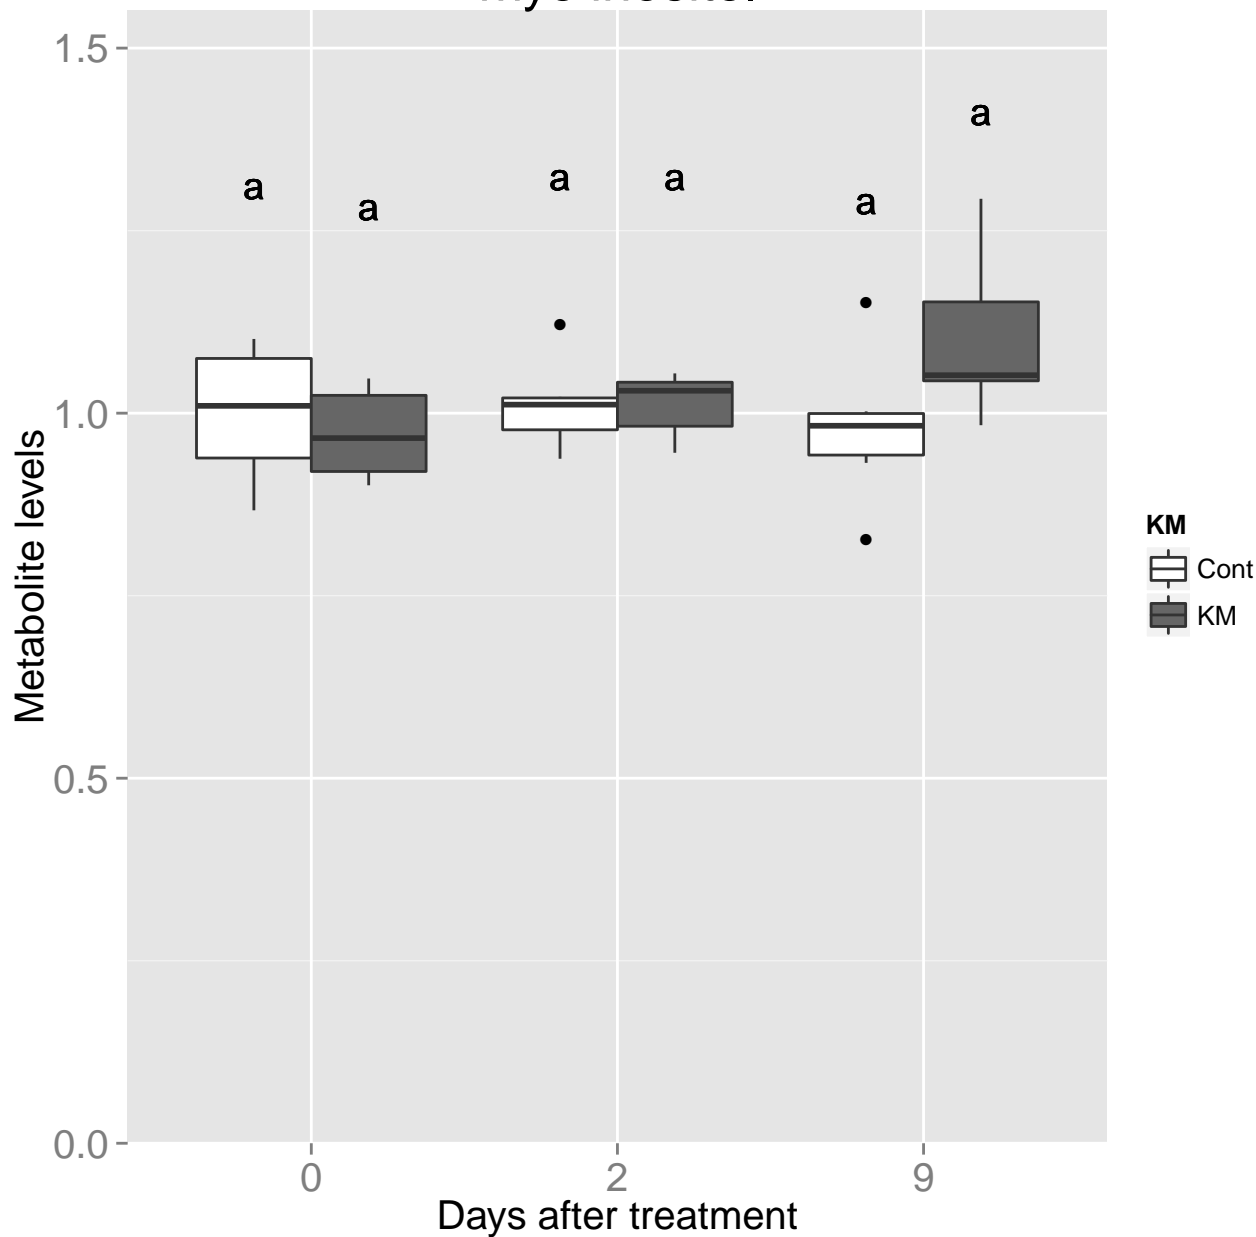

# Tyrosine

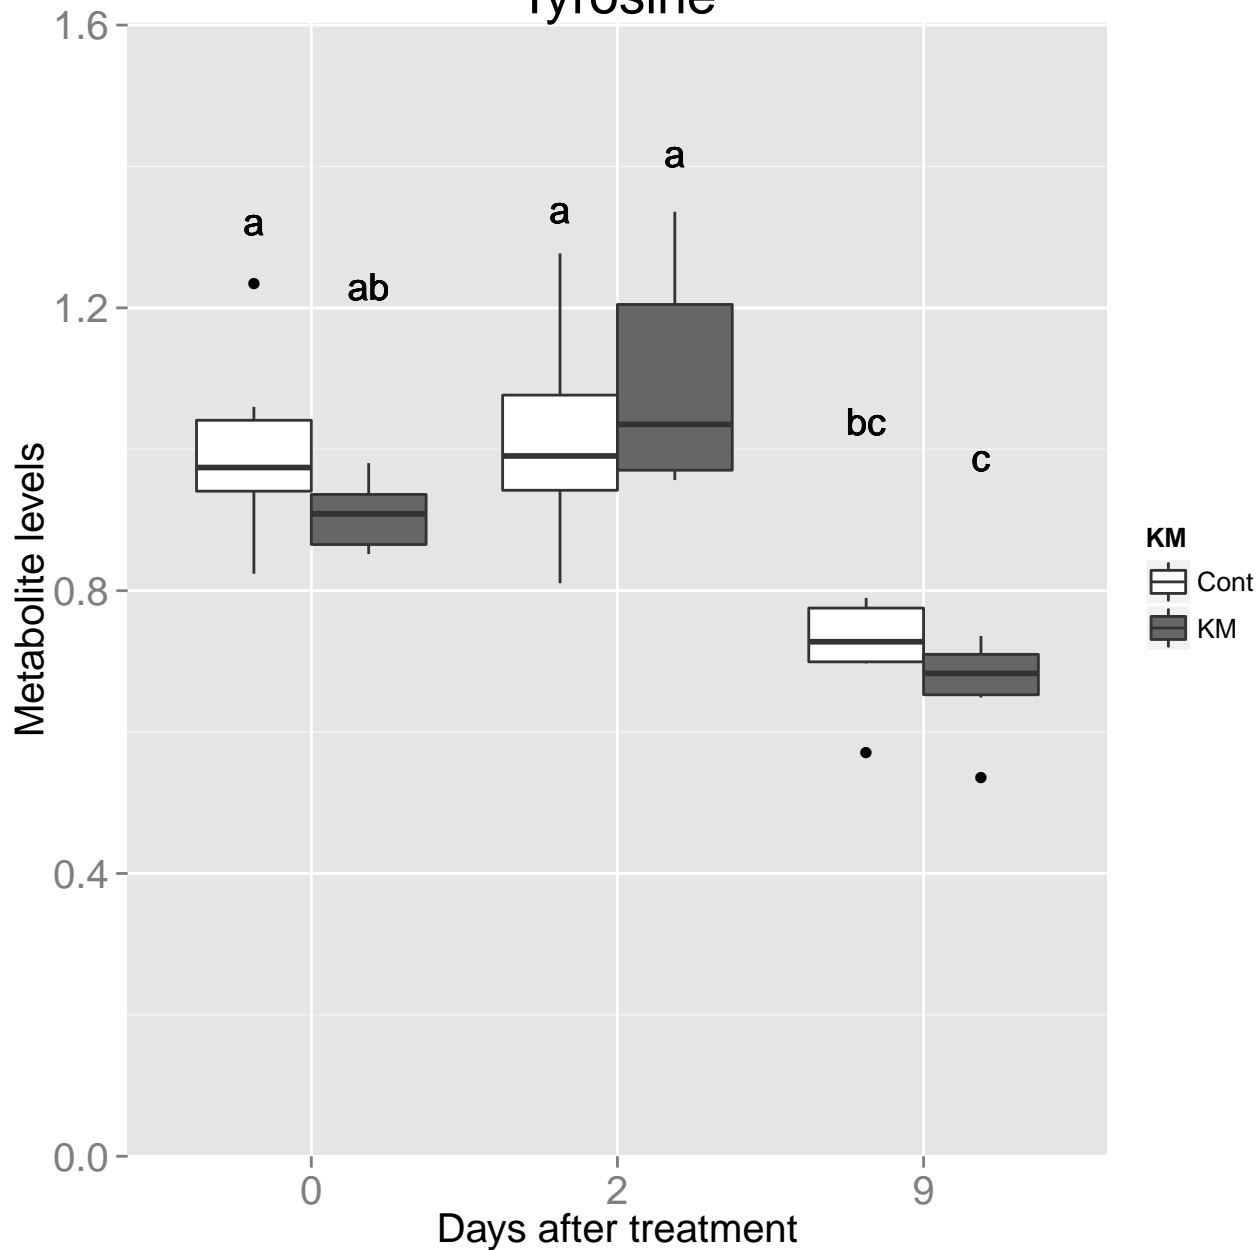

# Histidine

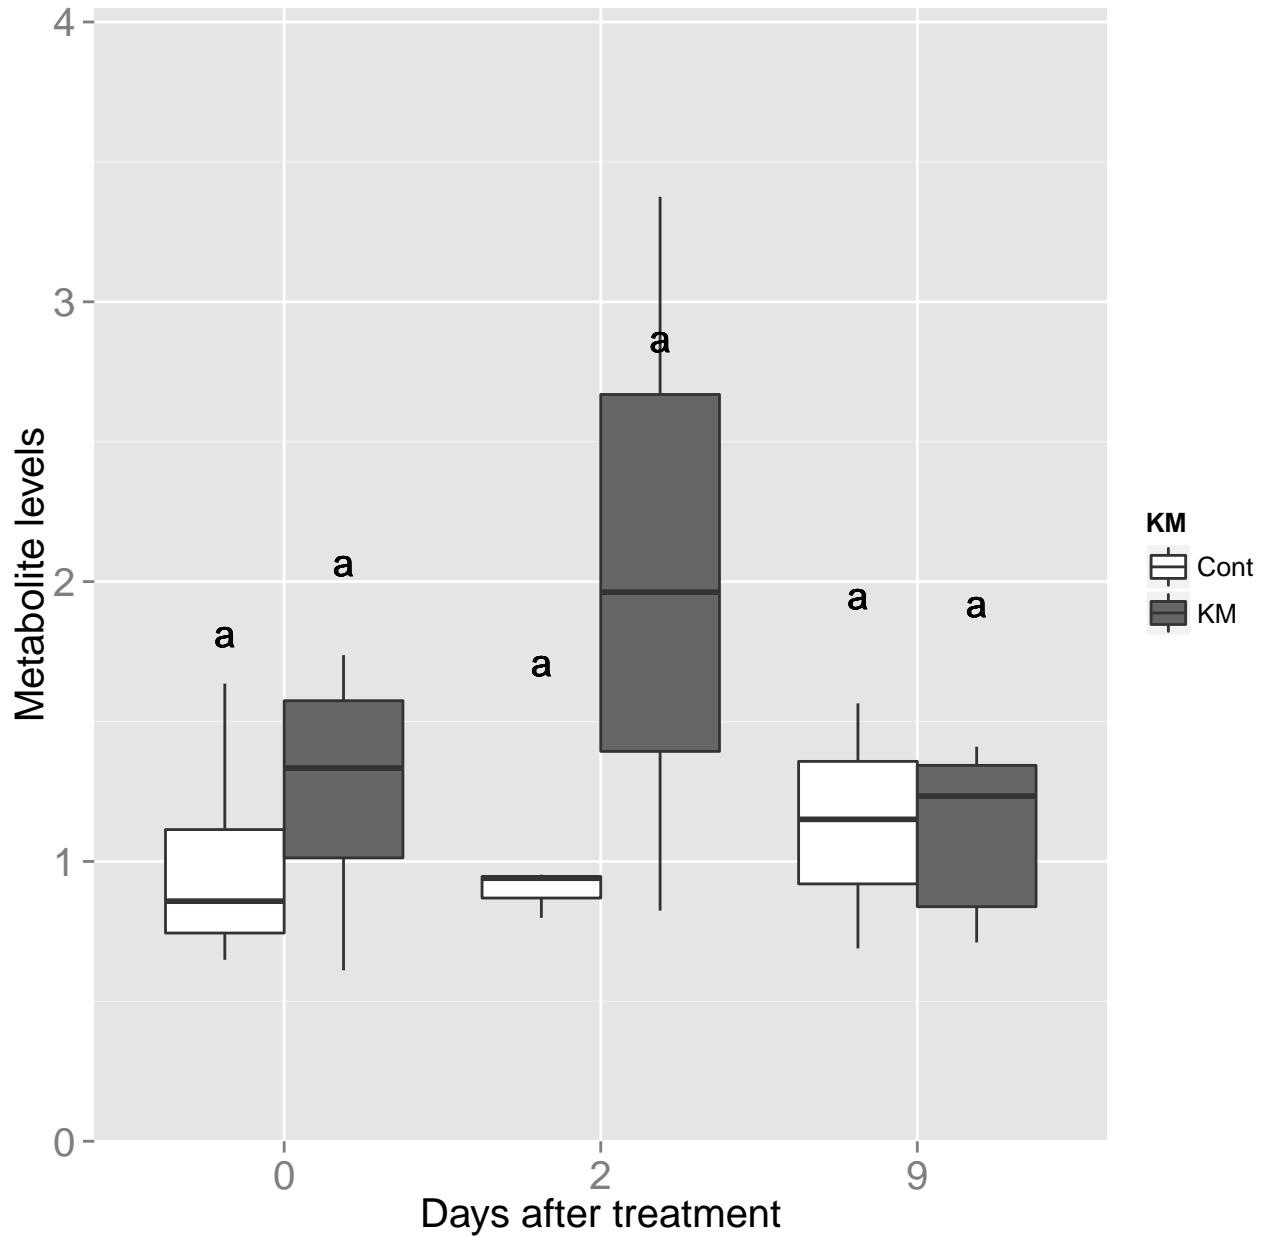

# Adenine

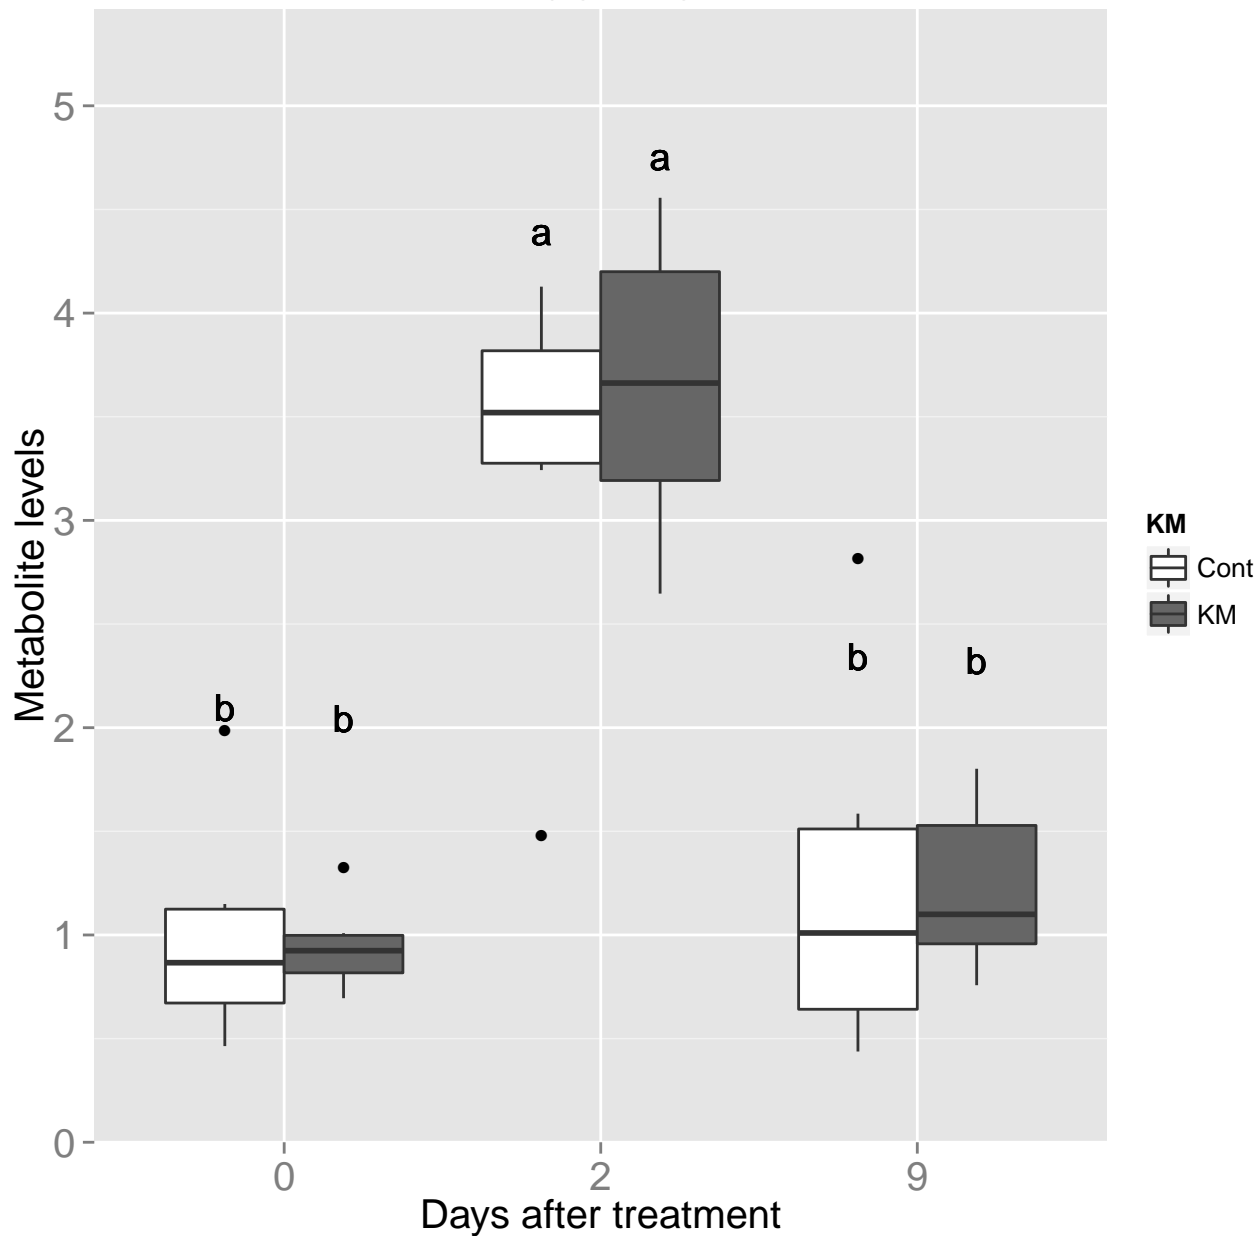



# X4.hydroxycinnamate

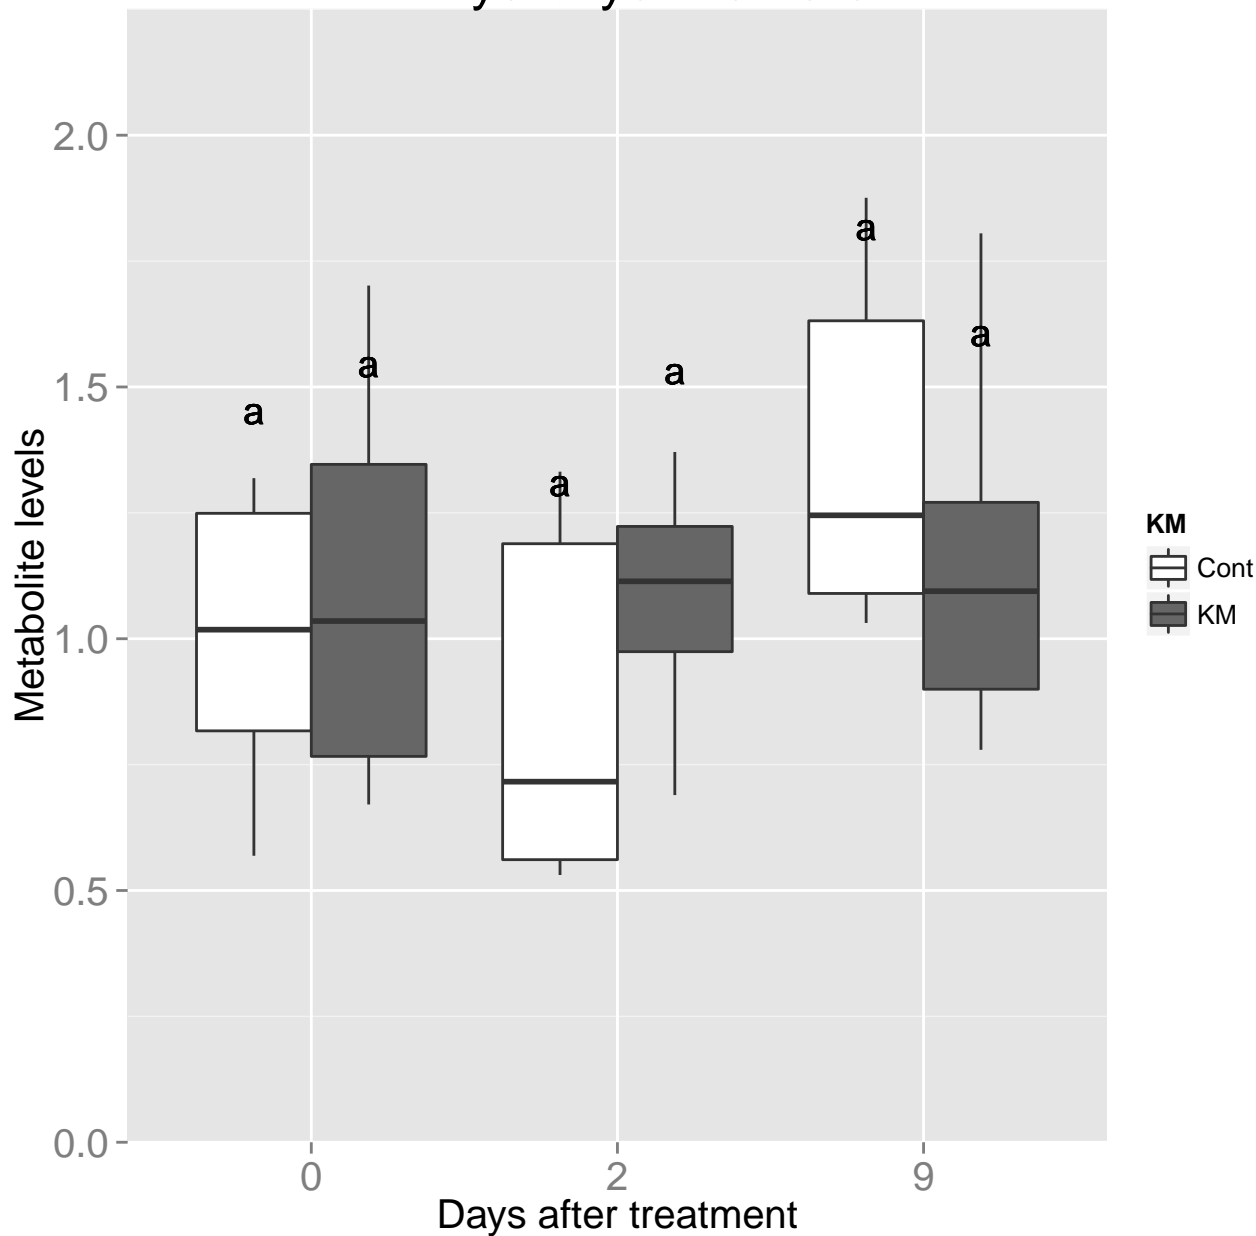

# Tryptophane

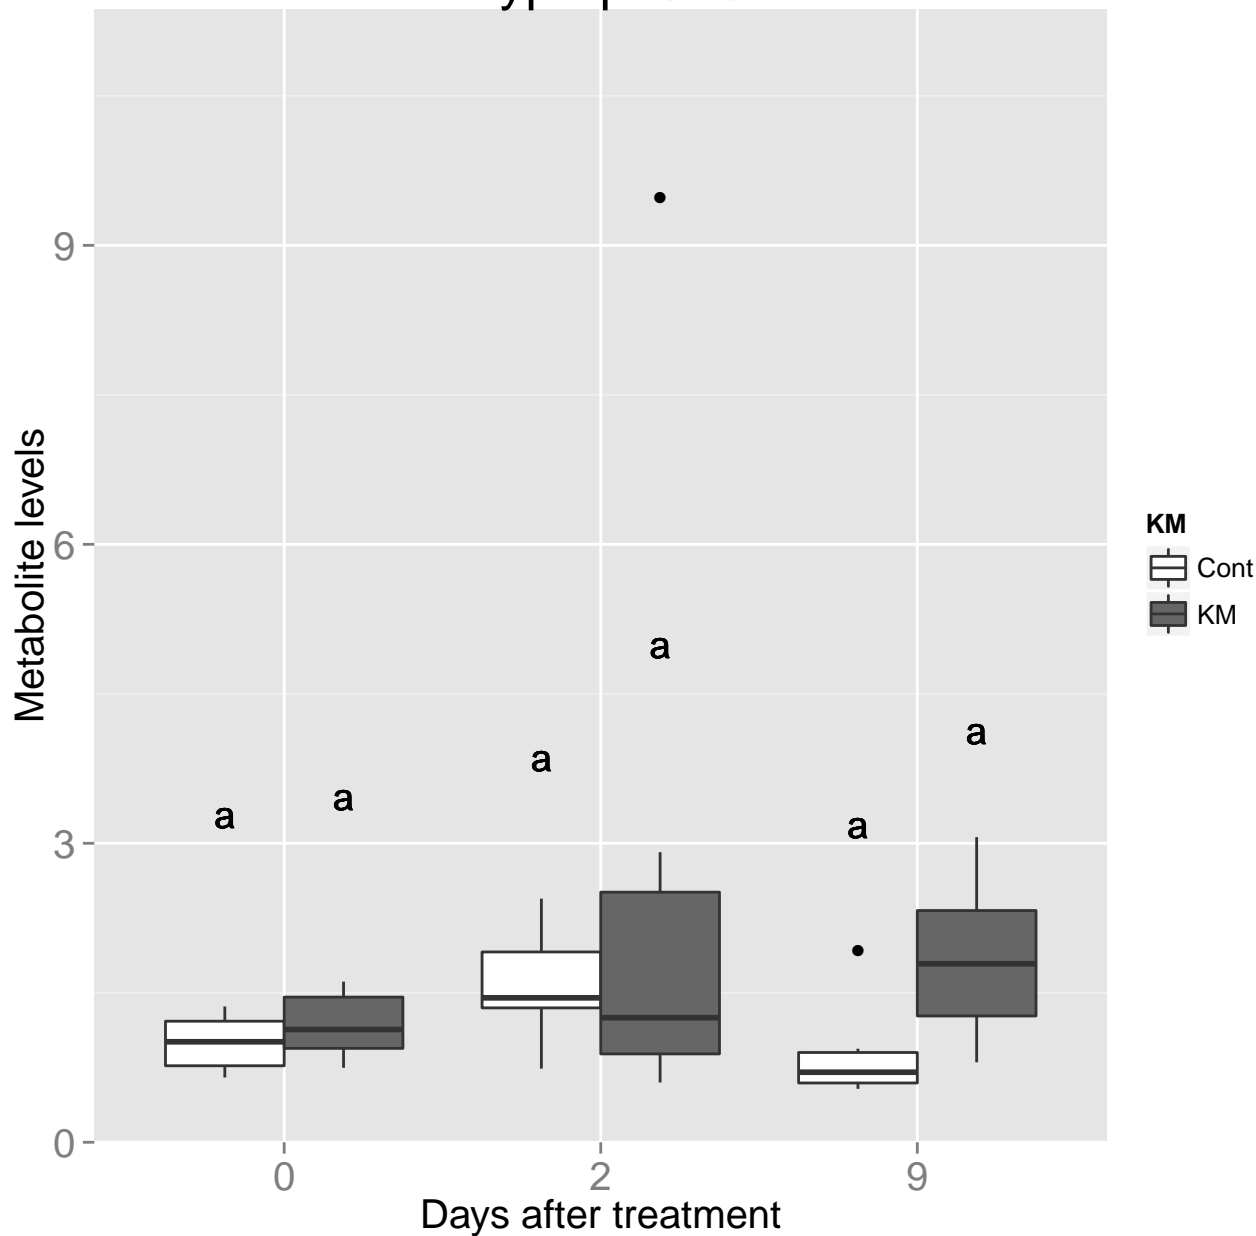

# Sucrose

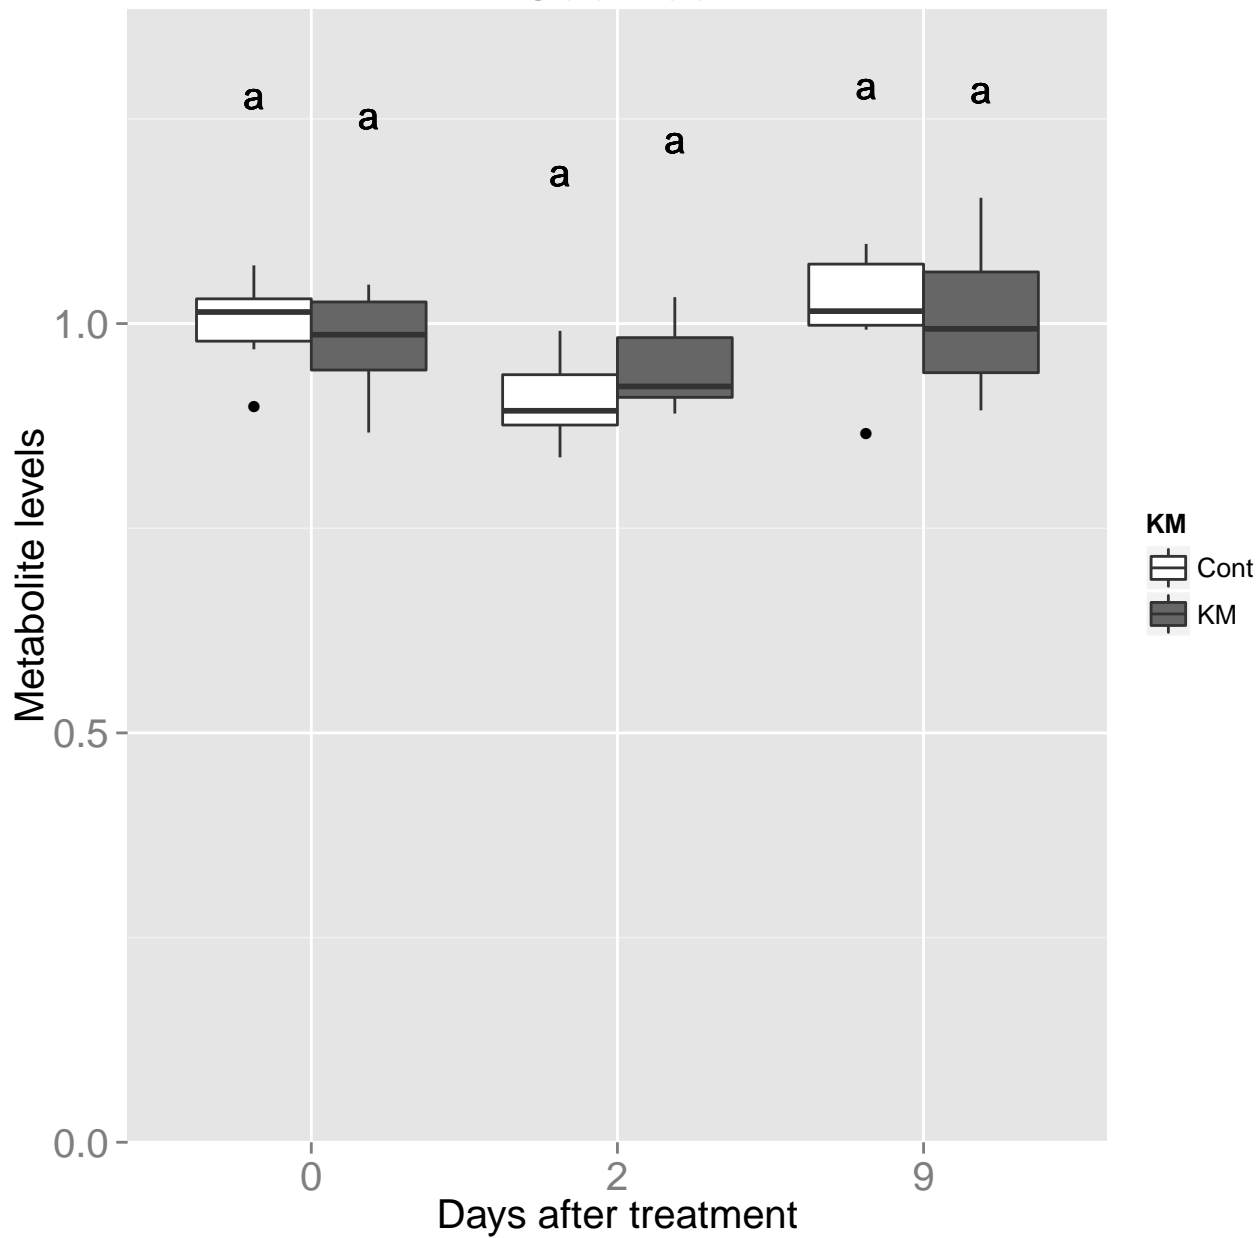

# Cellobiose

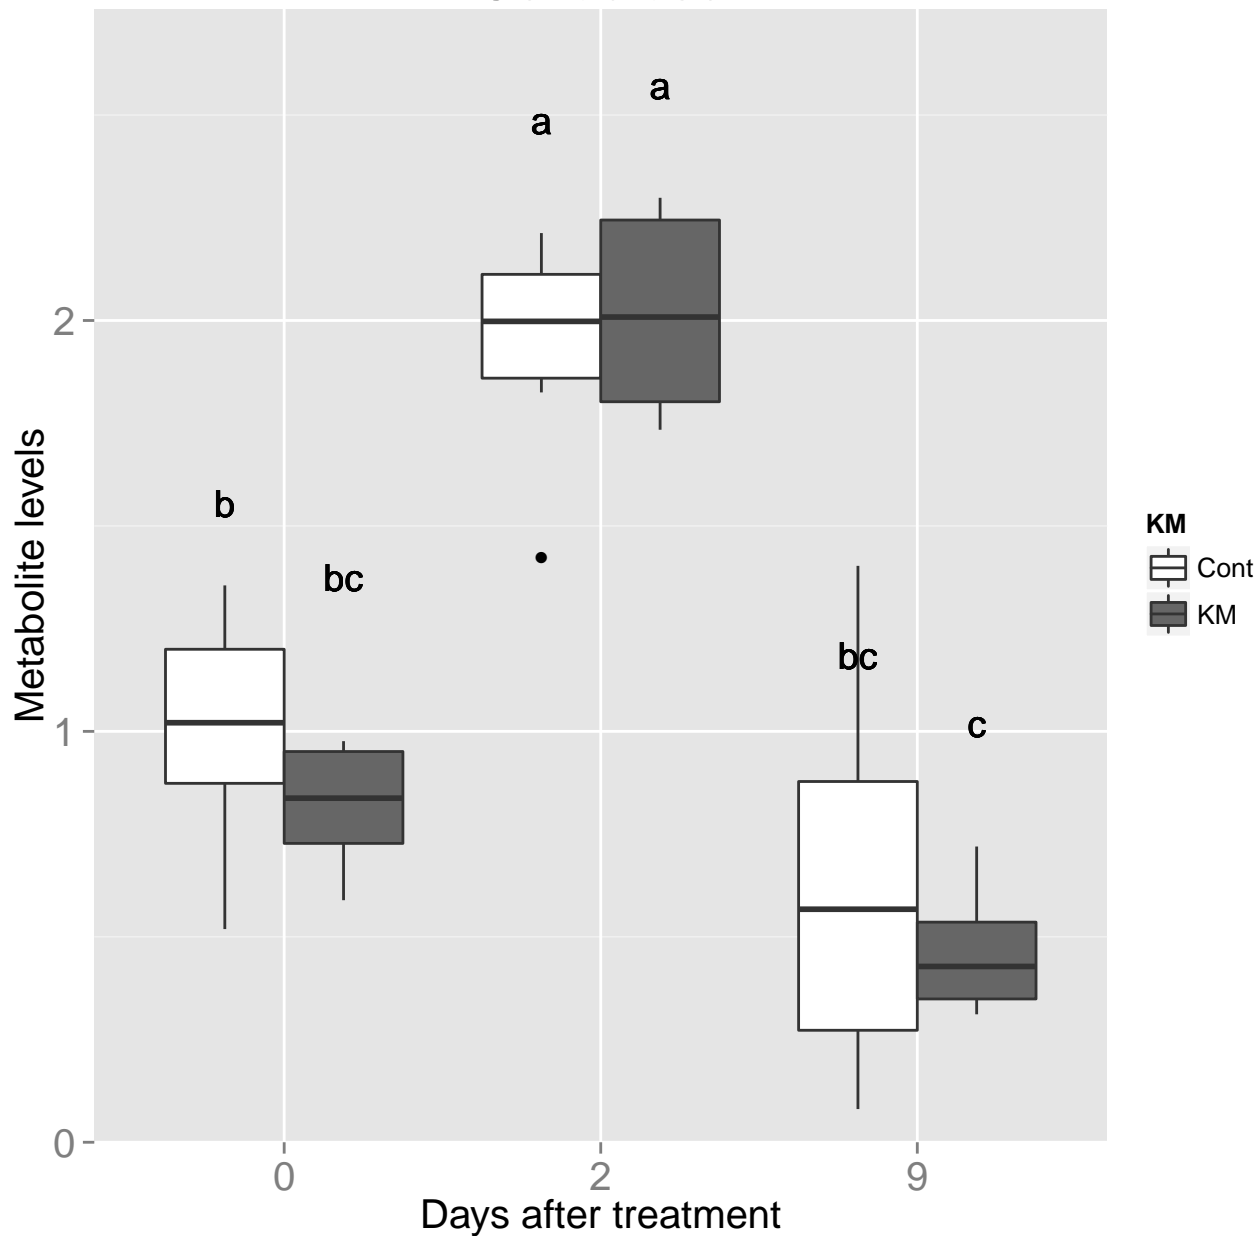

# Maltose

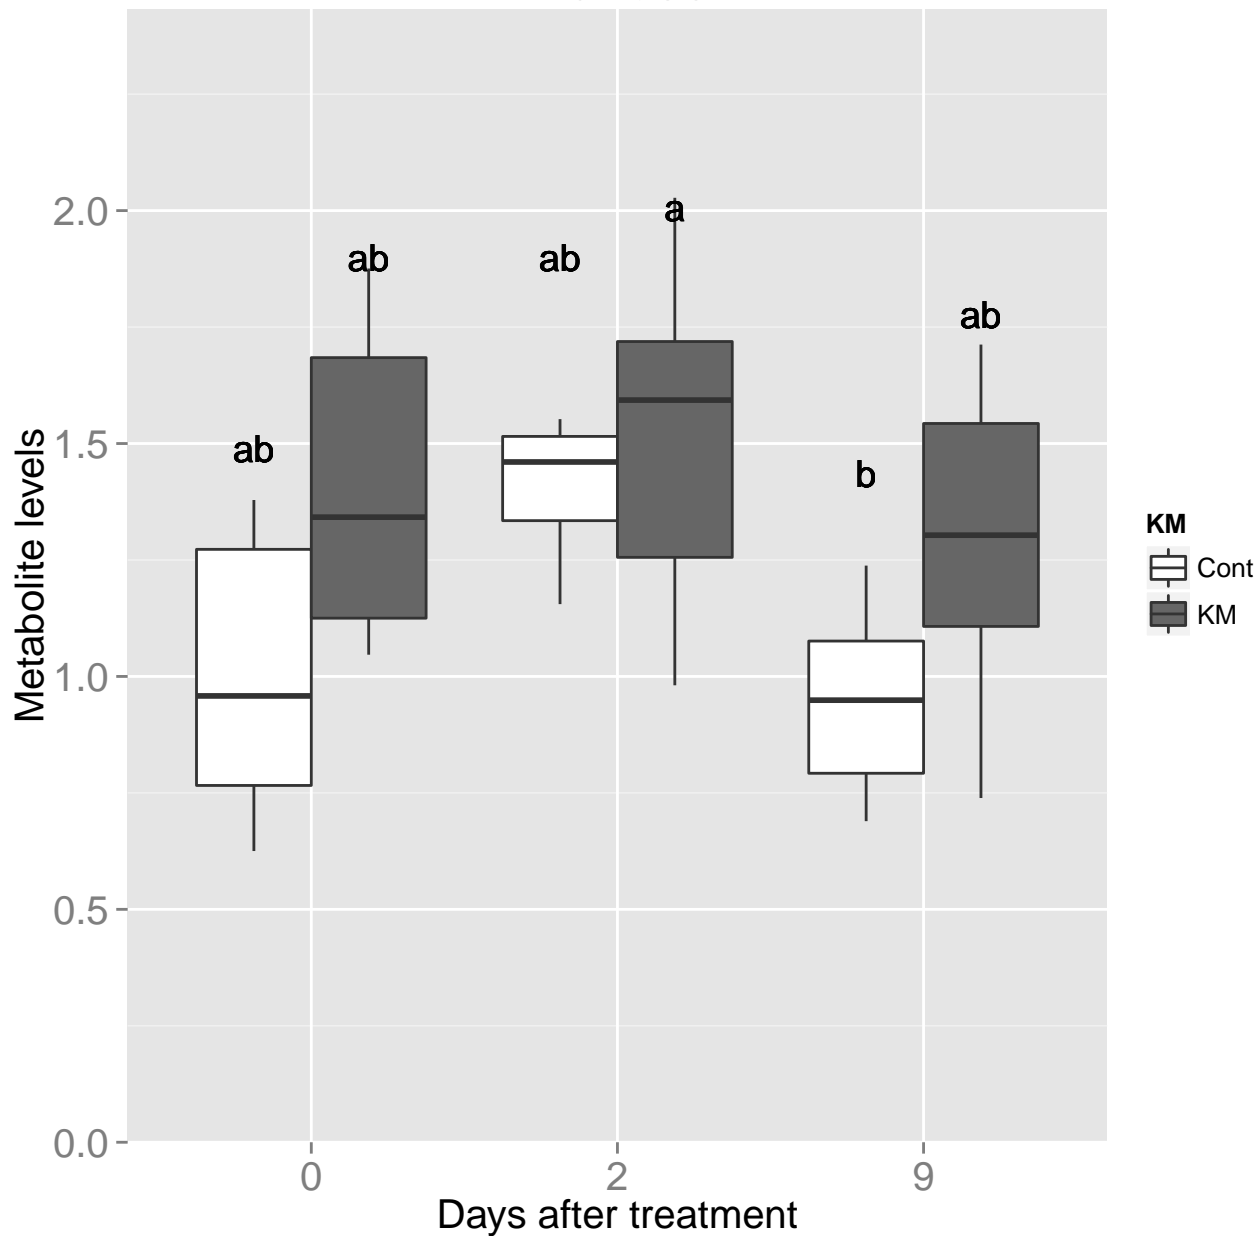

# Trehalose

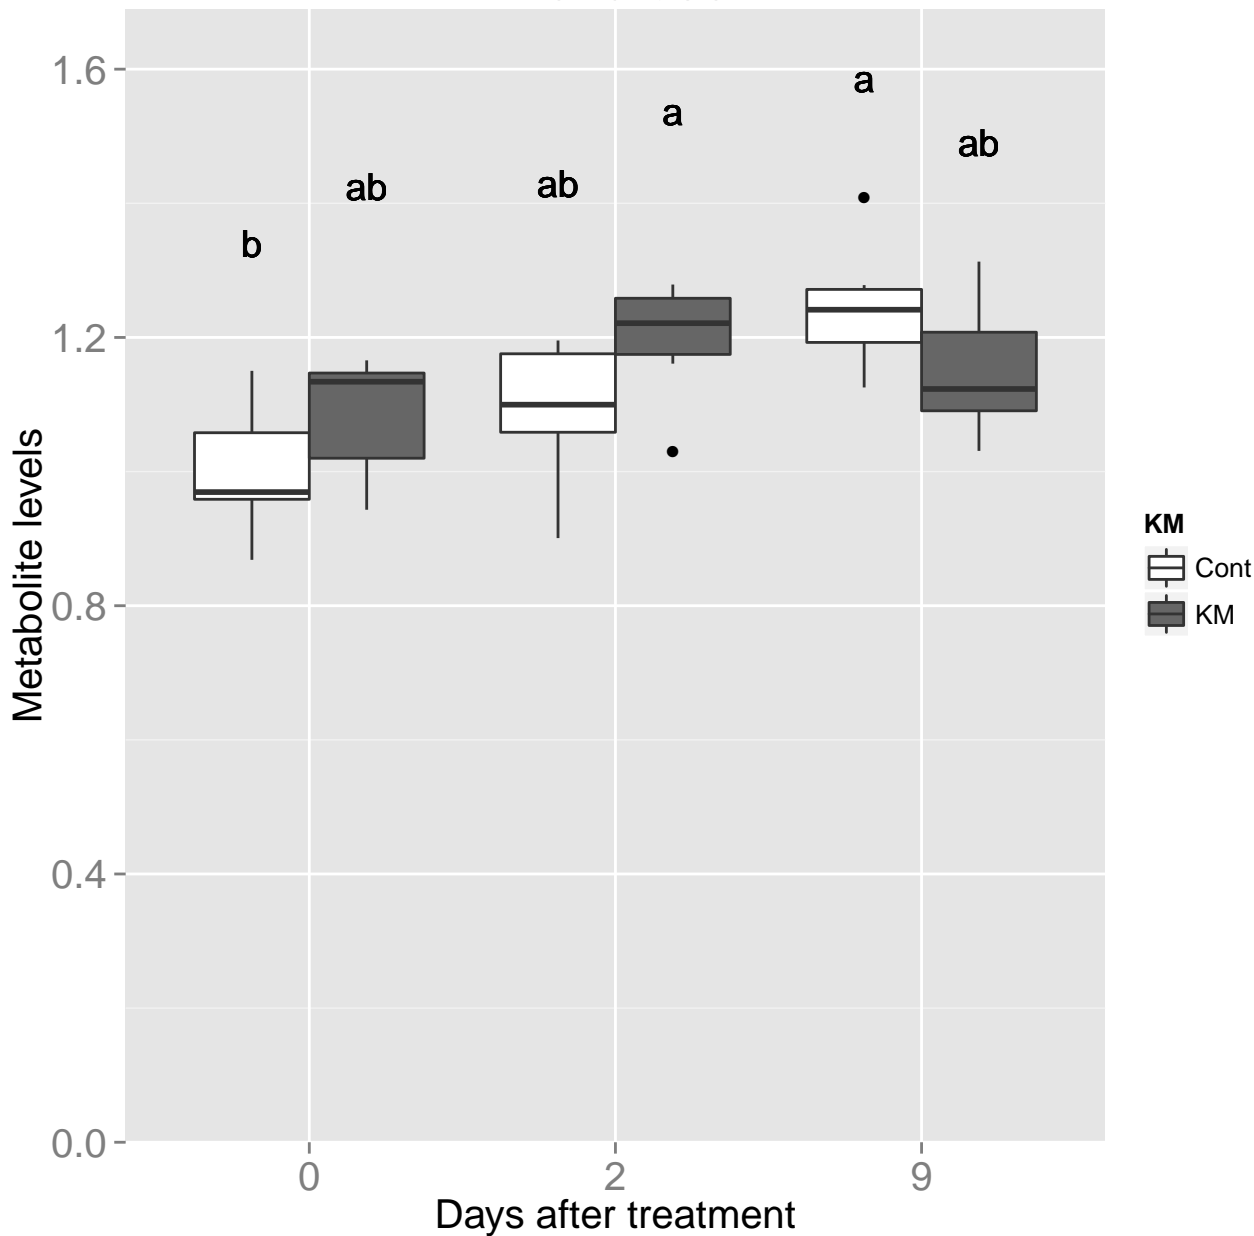

# Galactinol

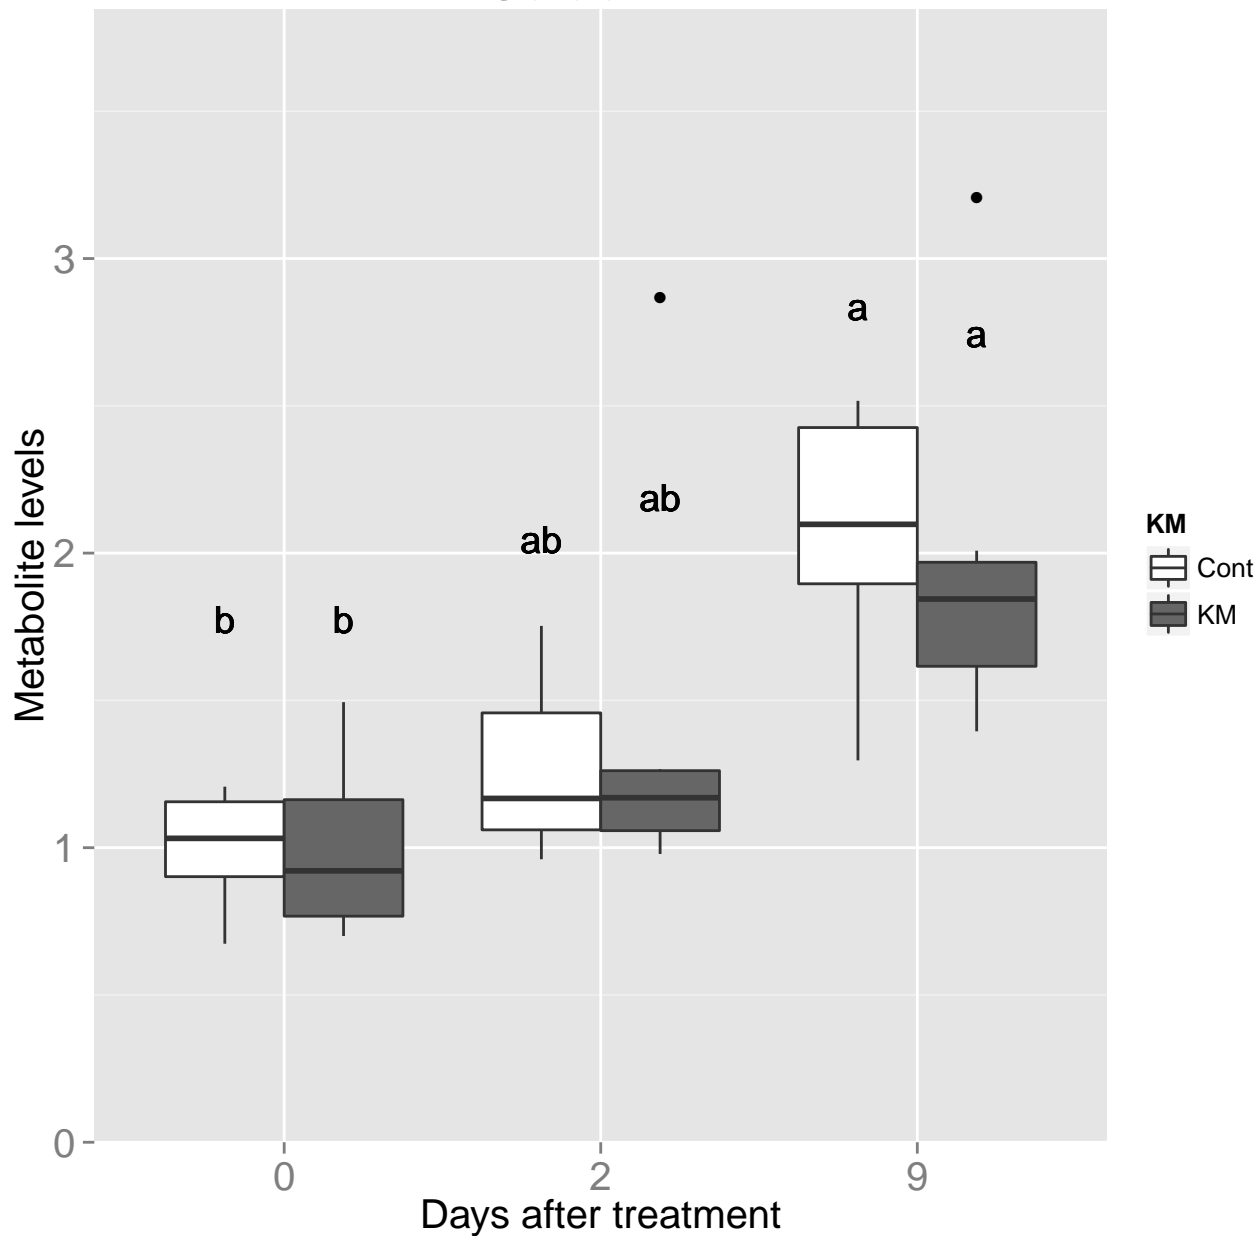

# Raffinose

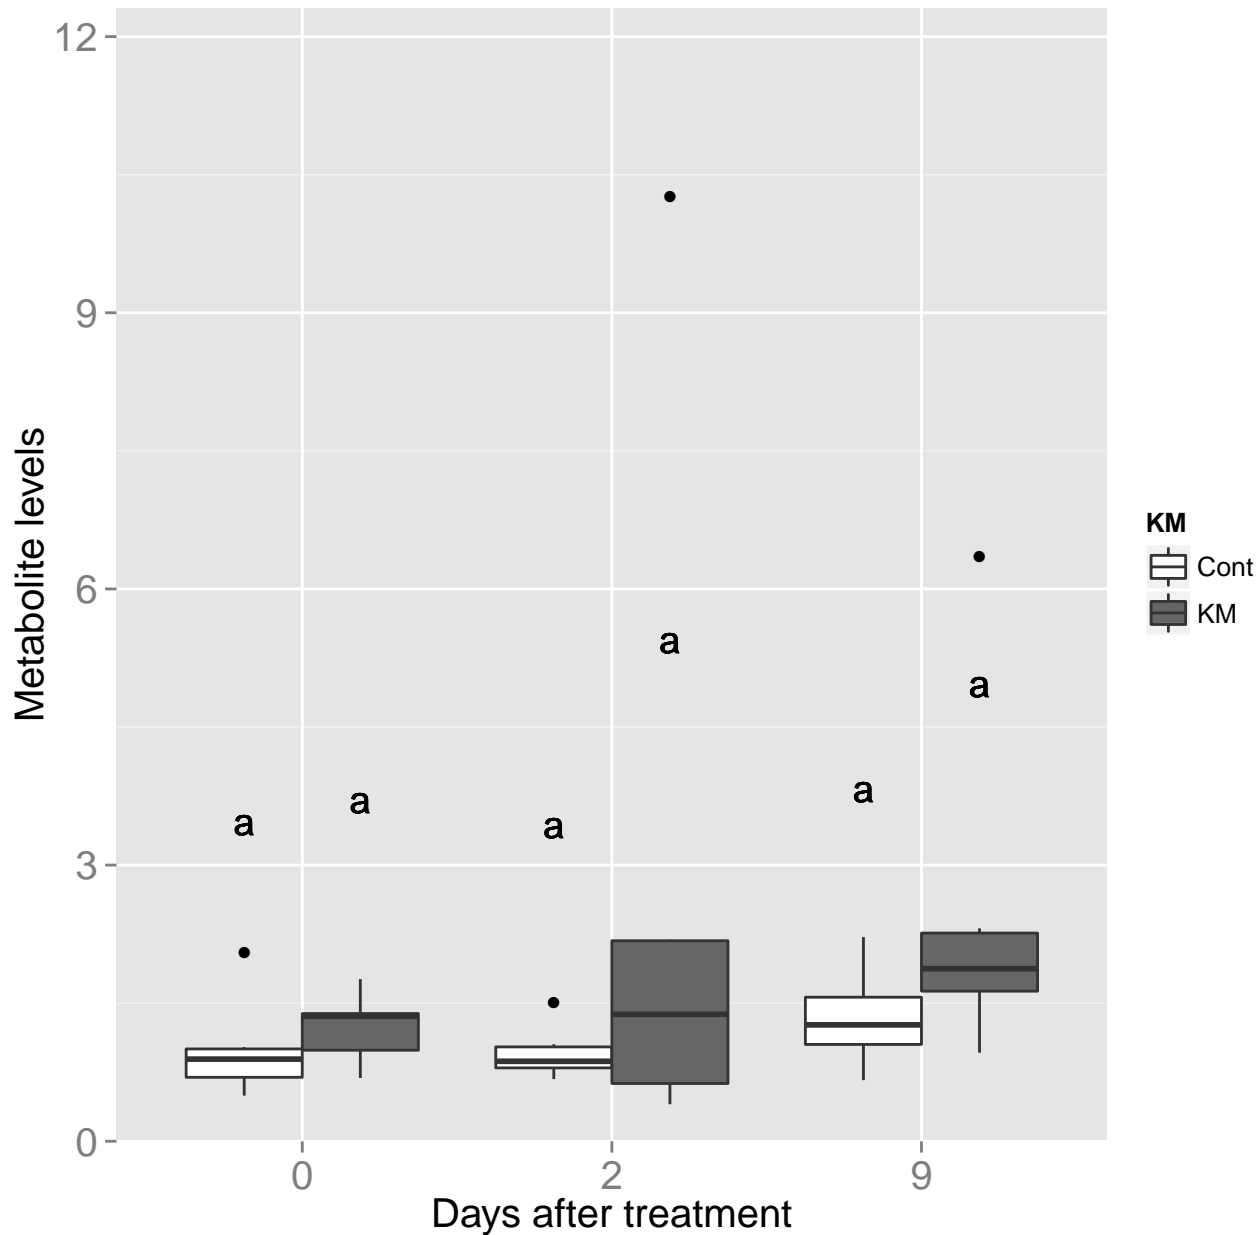

Supplement: supp_erv516_Supplementary_figures_S1_S4___Table_S1.pdf [file supp_erv516_Supplementary_figures_S1_S4___Table_S1.pdf]
